# Supplementary material
Source: publisher site journal article supplement (https://www.dovepress.com/get_supplementary_file.php?f=369832.xlsx)
Supplement: Supplementary file 1 [file get_supplementary_file.php]

## Sheet: Supplementary Material 1
Supplementary Material 1
Information on 147 active compounds contained in 5 Chinese herbs in JAKCP(RenShen,LingZhi,AiYe,HongJingtian and GouQizi herbs)
RenShen
MOLID	Mol name					OB			DL
MOL002879	Diop	390.62	7.44	0	4	43.59	0.79	0.26	0.39	0.28	3.6
MOL000449	Stigmasterol	412.77	7.64	1	1	43.83	1.44	1	0.76	0.22	5.57
MOL000358	beta-sitosterol	414.79	8.08	1	1	36.91	1.32	0.99	0.75	0.23	5.36
MOL003648	Inermin	284.28	2.44	1	5	65.83	0.91	0.36	0.54	0.3	11.73
MOL000422	kaempferol	286.25	1.77	4	6	41.88	0.26	-0.55	0.24	0	14.74
MOL004492	Chrysanthemaxanthin	584.96	8.24	2	3	38.72	0.51	-0.98	0.58	0.3	17.47
MOL005308	Aposiopolamine	271.34	1.39	1	4	66.65	0.66	0.4	0.22	0.35	3.54
MOL005314	Celabenzine	379.55	2.29	2	5	101.88	0.77	0.05	0.49	0.35	8.15
MOL005317	Deoxyharringtonine	515.66	3.13	1	9	39.27	0.19	-0.25	0.81	0.23	7.9
MOL005318	Dianthramine	289.26	2.05	5	7	40.45	-0.23	-0.97	0.2	0.42	5.14
MOL005320	arachidonate	304.52	6.41	1	2	45.57	1.27	0.58	0.2	0.26	7.56
MOL005321	Frutinone A	264.24	2.7	0	4	65.9	0.89	0.46	0.34	0.47	19.1
MOL005344	ginsenoside rh2	622.98	4.04	6	8	36.32	-0.51	-1.38	0.56	0.24	11.08
MOL005348	Ginsenoside-Rh4_qt	458.8	5.59	3	3	31.11	0.5	-0.18	0.78	0.25	6.97
MOL005356	Girinimbin	263.36	4.6	1	1	61.22	1.72	1.22	0.31	0.33	8.17
MOL005357	Gomisin B	514.62	2.73	1	9	31.99	0.6	0.18	0.83	0.19	7.81
MOL005360	malkangunin	432.56	1.84	2	7	57.71	0.22	-0.17	0.63	0.3	4.09
MOL005376	Panaxadiol	460.82	5.46	2	3	33.09	0.82	0.23	0.79	0.22	6.34
MOL005384	suchilactone	368.41	3.73	0	6	57.52	0.82	0.28	0.56	0.28	9.03
MOL005399	alexandrin_qt	414.79	8.08	1	1	36.91	1.3	0.88	0.75	0.23	5.53
MOL005401	ginsenoside Rg5_qt	442.8	6.8	2	2	39.56	0.88	0.21	0.79	0.24	5.65
MOL000787	Fumarine	353.4	2.95	0	6	59.26	0.56	-0.13	0.83	0.3	23.46
LingZhi
MOLID	Mol name					OB			DL
MOL011125	(+)-Ganoderic acid Mf	512.8	6.07	2	5	32.62	0.13	-0.8	0.82	0.28	7.01
MOL011127	(+)-Methyl ganolucidate A	514.77	3.68	1	6	31.14	-0.19	-0.92	0.82	0.26	11.3
MOL011129	methyl (4R)-4-[(5R,10S,13R,14R,17R)-4,4,10,13,14-pentamethyl-3,7,11,15-tetraoxo-2,5,6,12,16,17-hexahydro-1H-cyclopenta[a]phenanthren-17-yl]pentanoate	470.66	2.69	0	6	32.67	-0.21	-0.88	0.81	0.32	6.89
MOL011135	22,23-dimethylene ganodermic acid S	578.86	6.56	1	6	33.61	0.14	-1.05	0.71	0.33	10.18
MOL011136	22β-acetoxy-3α,15α-dihydroxylanosta-7,9(11),24-trien-26-oic acid	528.9	7.14	2	4	37.64	0.64	-0.06	0.8	0.25	7.82
MOL011137	campesta-7,22E-dien-3beta-ol	398.74	7.18	1	1	43.51	1.33	0.98	0.72	0.22	4.97
MOL011140	5alpha-Lanosta-7,9(11),24-triene-15alpha,26-dihydroxy-3-one	454.76	5.44	2	3	38.54	0.23	-0.91	0.81	0.25	5.87
MOL011156	epoxyganoderiol A	472.78	4.79	2	4	33.78	0.15	-0.78	0.83	0.25	6.68
MOL011157	epoxyganoderiol B	454.76	5.45	1	3	42.3	0.54	-0.36	0.83	0.25	5.14
MOL011158	epoxyganoderiol C	456.78	5.49	2	3	37.7	0.53	-0.35	0.83	0.24	4.89
MOL011159	ergosta-4,6,8(14),22-tetraene-3-one	406.71	6.99	0	1	48.32	1.51	1.15	0.75	0.29	5.98
MOL011160	ergosta-4,7,22-trien-3,6-dione	408.68	6.31	0	2	47.86	0.96	0.47	0.77	0.29	5.53
MOL011162	Ergosta-7,22-dien-3beta-yl palmitate	637.2	14.16	0	2	37.6	1.48	0.75	0.43	0.19	8.08
MOL011164	ergosta-7,22-dien-3β,5α,6α-triol	430.74	5.15	3	3	31.43	0.17	-0.43	0.77	0.25	6.19
MOL011165	ergosta-7,22-diene-3beta-yl linoleate	661.22	14.18	0	2	45.11	1.58	0.53	0.37	0.21	11.19
MOL011166	ergosta-7,22-diene-3beta-yl palmitate	637.2	14.16	0	2	37.6	1.5	0.63	0.43	0.18	8.46
MOL011167	ergosta-7,22-diene-3beta-yl pentadecanoate	623.17	13.7	0	2	38.25	1.5	0.72	0.47	0.18	7.82
MOL011168	ergosta-7,9(11),22-trien-3β,5α,6α-triol	442.75	5.1	3	3	46.95	0.26	-0.48	0.78	0.23	5.37
MOL011169	Peroxyergosterol	428.72	6.73	1	3	44.39	0.86	0.43	0.82	0.24	4.06
MOL011171	ganoderal B	440.73	5.73	1	3	42.56	0.43	-0.43	0.81	0.28	6.99
MOL011172	ganoderan B	454.76	6.14	1	3	42.19	0.44	-0.4	0.81	0.29	6.69
MOL011183	(E,6R)-6-[(3S,5R,7S,10S,13R,14R,17R)-3,7-dihydroxy-4,4,10,13,14-pentamethyl-11,15-dioxo-2,3,5,6,7,12,16,17-octahydro-1H-cyclopenta[a]phenanthren-17-yl]-2-methylhept-2-enoic acid	500.74	3.85	3	6	30.54	-0.27	-1.1	0.82	0.29	7.39
MOL011189	Ganoderic acid DM	468.74	6.06	1	4	38.8	0.36	-0.45	0.83	0.3	6.25
MOL011206	(E,6R)-6-[(3R,5R,10S,13R,14R,15S,17R)-3,15-diacetoxy-4,4,10,13,14-pentamethyl-2,3,5,6,12,15,16,17-octahydro-1H-cyclopenta[a]phenanthren-17-yl]-2-methylhept-2-enoic acid	554.84	6.45	1	6	31.16	0.15	-0.8	0.76	0.29	7.81
MOL011209	ganoderic acid Mi	528.85	6.92	1	5	34.4	0.47	-0.38	0.81	0.26	9.01
MOL011214	(E,5S,6S)-5-acetoxy-6-[(3R,5R,10S,13R,14R,17R)-3-acetoxy-4,4,10,13,14-pentamethyl-2,3,5,6,12,15,16,17-octahydro-1H-cyclopenta[a]phenanthren-17-yl]-2-methylhept-2-enoic acid	554.84	6.38	1	6	31.46	0.03	-0.82	0.77	0.3	8.29
MOL011215	(E,5S,6S)-5-acetoxy-6-[(3R,5R,10S,13R,14R,17R)-3-hydroxy-4,4,10,13,14-pentamethyl-2,3,5,6,12,15,16,17-octahydro-1H-cyclopenta[a]phenanthren-17-yl]-2-methylhept-2-enoic acid	512.8	6	2	5	34.37	0.01	-0.78	0.83	0.29	7.93
MOL011218	ganoderic acid TQ	524.81	6.24	1	5	36.3	0.22	-0.75	0.78	0.29	7.42
MOL011219	Ganoderic acid TR	468.74	5.65	2	4	36.23	0.13	-0.78	0.83	0.29	7.64
MOL011221	ganoderic acid V	528.8	5.37	2	6	30.19	-0.11	-0.96	0.8	0.31	8.6
MOL011222	Ganoderic acid V1	512.75	4.02	2	6	30.18	-0.36	-1.28	0.8	0.33	6.47
MOL011224	Ganoderic acid X	512.8	6.07	2	5	33.55	0.17	-0.72	0.81	0.29	7.8
MOL011225	Ganoderic acid Y	454.76	6.79	2	3	38.64	0.62	-0.33	0.82	0.28	6.35
MOL011226	ganoderic acid Z	456.78	7.24	2	3	37.67	0.56	-0.19	0.82	0.27	8.2
MOL011229	Ganoderic aldehyde A	454.76	6.14	1	3	42.26	0.39	-0.58	0.81	0.29	8.1
MOL011235	Ganoderiol F	454.76	5.45	2	3	38.12	0.35	-0.59	0.82	0.24	6.13
MOL011241	Ganodermanondiol	456.78	5.57	2	3	37.64	0.46	-0.32	0.8	0.27	5.24
MOL011243	ganodermatriol	456.78	5.49	3	3	30.46	0.11	-0.97	0.82	0.23	7.06
MOL011244	ganodermenonol	438.76	6.55	1	2	44.69	0.81	0.03	0.8	0.26	6.72
MOL011245	Ganodermic acid R	554.84	6.45	1	6	31.16	0.12	-1.04	0.76	0.31	9.22
MOL011247	ganodermic acid T- Q	512.8	6.07	2	5	33.55	0.22	-0.6	0.81	0.27	7.17
MOL011248	ganodermic acid T- O	512.8	6.07	2	5	32.62	0.18	-0.79	0.82	0.27	7.24
MOL011250	Ganodermnonol	438.76	6.55	1	2	44.69	0.81	0.01	0.8	0.26	7.03
MOL011251	(5R,10S,13R,14R,17R)-17-[(E,2R)-7-hydroxy-6-methylhept-5-en-2-yl]-4,4,10,13,14-pentamethyl-1,2,5,6,12,15,16,17-octahydrocyclopenta[a]phenanthren-3-one	438.76	6.55	1	2	44.69	0.8	-0.04	0.8	0.25	6.05
MOL011256	ganolucidic acid E	484.74	4.96	2	5	32.85	-0.15	-1.17	0.82	0.3	7.21
MOL011258	ganosporelactone B	530.72	1.22	4	8	31.21	-0.88	-1.24	0.33	0.28	7.09
MOL011262	lanosta-7,9(11),24-trien-15α-acetoxy-3α-hydroxy-23-oxo-26-oic acid	526.78	4.93	2	6	31.86	-0.22	-1.1	0.8	0.3	7.52
MOL011264	lanosta-7,9(11),24-trien-3α-acetoxy-15α-hydroxy-23-oxo-26-oic acid	526.78	4.93	2	6	30.81	-0.23	-1.14	0.81	0.31	6.98
MOL011265	lanosta-7,9(11),24-trien-3α-acetoxy-26-oic acid	496.8	7.17	1	4	38.85	0.61	-0.36	0.84	0.29	7.1
MOL011266	Lucialdehyde A	438.76	6.84	1	2	44.78	0.94	0.13	0.8	0.27	7.32
MOL011267	Lucialdehyde B	452.74	6.11	0	3	43.12	0.53	-0.33	0.81	0.29	6.04
MOL011268	Lucialdehyde C	454.76	6.14	1	3	42.26	0.5	-0.37	0.81	0.27	7.46
MOL011270	(4R)-4-[(5R,7S,10S,13R,14R,17R)-7-hydroxy-3,11,15-triketo-4,4,10,13,14-pentamethyl-1,2,5,6,7,12,16,17-octahydrocyclopenta[a]phenanthren-17-yl]valeric acid	458.65	2.48	2	6	30.34	-0.2	-0.71	0.79	0.32	7.42
MOL011287	lucidone A	402.58	1.09	2	5	37.22	-0.13	-0.47	0.64	0.32	6.22
MOL011290	Lucidumol A	458.8	6.01	2	3	34.75	0.28	-0.47	0.8	0.26	6.82
MOL011303	methyl Ganoderic acid DM	482.77	6.31	0	4	39.55	0.49	-0.33	0.83	0.27	5.28
MOL011304	methyl Ganoderic acid TR	482.77	5.9	1	4	39.82	0.35	-0.62	0.83	0.26	7.49
MOL011309	methyl (4R)-4-[(5R,7S,10S,13R,14R,15S,17R)-7,15-dihydroxy-4,4,10,13,14-pentamethyl-3,11-dioxo-2,5,6,7,12,15,16,17-octahydro-1H-cyclopenta[a]phenanthren-17-yl]pentanoate	474.7	2.77	2	6	30.19	-0.36	-1.04	0.81	0.26	6.67
MOL000279	Cerevisterol	430.74	5.15	3	3	37.96	0.28	-0.39	0.77	0	5.31
MOL000282	ergosta-7,22E-dien-3beta-ol	398.74	7.18	1	1	43.51	1.32	0.91	0.72	0	5.11
MOL000358	beta-sitosterol	414.79	8.08	1	1	36.91	1.32	0.99	0.75	0.23	5.36
AiYe
MOLID	Mol name					OB			DL
MOL001040	(2R)-5,7-dihydroxy-2-(4-hydroxyphenyl)chroman-4-one	272.27	2.3	3	5	42.36	0.38	-0.48	0.21	0.41	16.83
MOL001494	Mandenol	308.56	6.99	0	2	42	1.46	1.14	0.19	0.25	5.39
MOL002883	Ethyl oleate (NF)	310.58	7.44	0	2	32.4	1.4	1.1	0.19	0.19	4.85
MOL000358	beta-sitosterol	414.79	8.08	1	1	36.91	1.32	0.99	0.75	0.23	5.36
MOL000449	Stigmasterol	412.77	7.64	1	1	43.83	1.44	1	0.76	0.22	5.57
MOL005720	24-methylenecyloartanone	438.81	7.82	0	1	41.11	1.52	1.26	0.79	0	4.36
MOL005735	dammaradienyl acetate	454.81	8.1	0	2	44.83	1.4	1.07	0.83	0	5.84
MOL005741	cycloartenol acetate	468.84	7.93	0	2	41.11	1.48	1.33	0.8	0	6.71
MOL000098	quercetin	302.25	1.5	5	7	46.43	0.05	-0.77	0.28	0.38	14.4
GouQizi
MOLID	Mol name					OB			DL
MOL001323	Sitosterol alpha1	426.8	8.15	1	1	43.28	1.41	0.97	0.78	0.24	5.64
MOL003578	Cycloartenol	426.8	7.55	1	1	38.69	1.53	1.33	0.78	0	5
MOL001494	Mandenol	308.56	6.99	0	2	42	1.46	1.14	0.19	0.25	5.39
MOL001495	Ethyl linolenate	306.54	6.55	0	2	46.1	1.54	1.12	0.2	0.25	6.2
MOL001979	LAN	426.8	8.12	1	1	42.12	1.52	1.18	0.75	0.23	5.84
MOL000449	Stigmasterol	412.77	7.64	1	1	43.83	1.44	1	0.76	0.22	5.57
MOL000358	beta-sitosterol	414.79	8.08	1	1	36.91	1.32	0.99	0.75	0.23	5.36
MOL005406	atropine	289.41	1.72	1	4	45.97	0.43	0.01	0.19	0.28	2.75
MOL005438	campesterol	400.76	7.63	1	1	37.58	1.34	0.95	0.71	0.22	4.83
MOL006209	cyanin	411.66	7.08	0	1	47.42	1.78	0.99	0.76	0.28	2.72
MOL007449	24-methylidenelophenol	412.77	7.75	1	1	44.19	1.41	1	0.75	0.24	5.1
MOL008173	daucosterol_qt	414.79	8.08	1	1	36.91	1.33	0.85	0.75	0.23	5.6
MOL008400	glycitein	284.28	2.32	2	5	50.48	0.56	-0.29	0.24	0.3	16.32
MOL010234	delta-Carotene	536.96	12.19	0	0	31.8	2.33	1.42	0.55	0.35	2.62
MOL000953	CLR	386.73	7.38	1	1	37.87	1.43	1.13	0.68	0.2	4.52
MOL009604	14b-pregnane	288.57	6.54	0	0	34.78	1.8	1.95	0.34	0.2	4.57
MOL009612	(24R)-4alpha-Methyl-24-ethylcholesta-7,25-dien-3beta-ylacetate	482.87	8.79	0	2	46.36	1.39	1	0.84	0.26	8.25
MOL009615	24-Methylenecycloartan-3beta,21-diol	456.83	6.7	2	2	37.32	0.95	0.3	0.8	0.23	5.67
MOL009617	24-ethylcholest-22-enol	414.79	7.89	1	1	37.09	1.33	0.99	0.75	0.21	5.32
MOL009618	24-ethylcholesta-5,22-dienol	412.77	7.64	1	1	43.83	1.31	0.84	0.76	0.22	5.76
MOL009620	24-methyl-31-norlanost-9(11)-enol	428.82	8.15	1	1	38	1.33	0.93	0.75	0.23	5.49
MOL009621	24-methylenelanost-8-enol	440.83	8.43	1	1	42.37	1.44	1.18	0.77	0.25	5.43
MOL009622	Fucosterol	412.77	7.83	1	1	43.78	1.34	1.01	0.76	0.24	5.44
MOL009631	31-Norcyclolaudenol	440.83	8.04	1	1	38.68	1.35	0.94	0.81	0.25	4.88
MOL009633	31-norlanost-9(11)-enol	414.79	7.9	1	1	38.35	1.34	1.03	0.72	0.22	5.37
MOL009634	31-norlanosterol	412.77	7.85	1	1	42.2	1.4	1.03	0.73	0.24	5.27
MOL009635	4,24-methyllophenol	414.79	7.95	1	1	37.83	1.43	1.1	0.75	0.22	4.9
MOL009639	Lophenol	400.76	7.7	1	1	38.13	1.36	1.1	0.71	0.2	4.76
MOL009640	4alpha,14alpha,24-trimethylcholesta-8,24-dienol	426.8	8.29	1	1	38.91	1.4	1.06	0.76	0.24	6.67
MOL009641	4alpha,24-dimethylcholesta-7,24-dienol	412.77	7.89	1	1	42.65	1.43	0.98	0.75	0.23	5.44
MOL009642	4alpha-methyl-24-ethylcholesta-7,24-dienol	426.8	8.35	1	1	42.3	1.45	1.08	0.78	0.23	5.83
MOL009644	6-Fluoroindole-7-Dehydrocholesterol	402.7	7.04	1	2	43.73	1.03	0.54	0.72	0.24	5.1
MOL009646	7-O-Methylluteolin-6-C-beta-glucoside_qt	318.3	2.01	4	7	40.77	0.33	-0.47	0.3	0.29	14.1
MOL009650	Atropine	289.41	1.72	1	4	42.16	0.57	0.39	0.19	0.26	5.27
MOL009651	Cryptoxanthin monoepoxide	568.96	9.5	1	2	46.95	1.49	-0.03	0.56	0.33	4.4
MOL009653	Cycloeucalenol	426.8	7.59	1	1	39.73	1.42	1.04	0.79	0.23	5.01
MOL009656	(E,E)-1-ethyl octadeca-3,13-dienoate	308.56	6.99	0	2	42	1.46	1.11	0.19	0.21	5.47
MOL009660	methyl (1R,4aS,7R,7aS)-4a,7-dihydroxy-7-methyl-1-[(2S,3R,4S,5S,6R)-3,4,5-trihydroxy-6-(hydroxymethyl)oxan-2-yl]oxy-1,5,6,7a-tetrahydrocyclopenta[d]pyran-4-carboxylate	406.43	-3.18	6	11	39.43	-1.43	-2.06	0.47	0.23	7.64
MOL009662	Lantadene A	552.87	7.21	1	5	38.68	0.32	-0.3	0.57	0.3	5.44
MOL009664	Physalin A	526.58	0.5	3	10	91.71	-0.78	-1.11	0.27	0.39	13.21
MOL009665	Physcion-8-O-beta-D-gentiobioside	608.6	-0.91	8	15	43.9	-2.68	-3.52	0.62	0.29	28.46
MOL009677	lanost-8-en-3beta-ol	428.82	8.37	1	1	34.23	1.48	1.25	0.74	0.22	5.48
MOL009678	lanost-8-enol	428.82	8.37	1	1	34.23	1.37	1.12	0.74	0.22	6.41
MOL009681	Obtusifoliol	426.8	8.15	1	1	42.55	1.47	1.25	0.76	0.24	5.91
MOL000098	quercetin	302.25	1.5	5	7	46.43	0.05	-0.77	0.28	0.38	14.4
HongJingtian
MOLID						OB				DL
MOL000513	gallic acid，	170.13	0.63	4	5	31.69	-0.09	-0.54	0.04	0.41	97.99
MOL002929	salidroside	300.34	-0.47	5	7	17.01	-0.82	-1.41	0.2	0.3	119.61
MOL013083	skimmin	324.31	-0.27	4	8	38.35	-1.02	-1.57	0.32	0.3	129.59
MOL006821	Epigallocatechin gallate	458.4	2.89	8	11	55.09	-0.57	-1.7	0.77	0.37/0.514(ETCM)	197.37
MOL000422	kaempferol	286.25	1.77	4	6	41.88	0.26	-0.55	0.24	0.2	111.13
MOL001002	ellagic acid	302.2	1.48	4	8	43.06	-0.44	-1.41	0.43	0.43	141.34
MOL000073	ent-Epicatechin	290.29	1.92	5	6	48.96	0.02	-0.64	0.24	0.34	110.38

## Sheet: Supplementary Material 2
Supplementary Material 2
Crossover active compounds of RS, LZ, AY,HJT and GQZ herbs in JAKCP
RS-MOL	LZ-MOL	AY-MOL	HJT-MOL	GQZ-MOL		NO.	Repetitive MOL	Abbreviations
MOL002879	MOL011129	MOL001040	MOL000513	MOL001323		A1	MOL000449	RS	AY	GQZ
MOL000449	MOL011137	MOL001494	MOL013083	MOL003578		A2	MOL000358	RS	LZ	AY
MOL000358	MOL011140	MOL002883	MOL006821	MOL001494		B1	MOL000422	RS	HJT
MOL003648	MOL011159	MOL000358	MOL000422	MOL001495		B2	MOL001494	AY	GQZ
MOL000422	MOL011168	MOL000449	crenulatin	MOL001979		C1	MOL000098	AY	GQZ
MOL005308	MOL011171	MOL000098	kenposide A	MOL000449
MOL005317	MOL011256		isolariciresinol-9，9'-acetonide	MOL000358
MOL005318	MOL011267		MOL001002	MOL005406
MOL005320	MOL011270		MOL000073	MOL005438
MOL005321	MOL011287			MOL006209
MOL005344	MOL011309			MOL007449
MOL005348	MOL000279			MOL008173
MOL005356	MOL000282			MOL008400
MOL005376	MOL000358			MOL000953
MOL005384				MOL009604
MOL005399				MOL009617
MOL000787				MOL009618
				MOL009620
				MOL009621
				MOL009622
				MOL009633
				MOL009634
				MOL009635
				MOL009639
				MOL009640
				MOL009641
				MOL009642
				MOL009644
				MOL009646
				MOL009650
				MOL009656
				MOL009665
				MOL009677
				MOL009678
				MOL009681
				MOL000098

## Sheet: Supplementary Material 3
Supplementary Material 3
Network of the relationship between 5 Chinese herbs, active compounds and targets in JAKCP
Network File		Type File
ID	Gene	Term	Type
RS1	SCN5A	A1	A1
RS1	ADRB2	A1	A1
RS1	CHRM3	A1	A1
A1	PGR	A1	A1
A1	NR3C2	A1	A1
A1	NCOA2	A1	A1
A1	ADH1C	A1	A1
A1	IGHG1	A1	A1
A1	RXRA	A1	A1
A1	NCOA1	A1	A1
A1	PTGS1	A1	A1
A1	PTGS2	A1	A1
A1	ADRA2A	A1	A1
A1	SLC6A2	A1	A1
A1	SLC6A3	A1	A1
A1	ADRB2	A1	A1
A1	AKR1B10	A1	A1
A1	PLAU	A1	A1
A1	LTA4H	A1	A1
A1	MAOB	A1	A1
A1	MAOA	A1	A1
A1	PRKACA	A1	A1
A1	CTRB1	A1	A1
A1	CHRM3	A1	A1
A1	CHRM1	A1	A1
A1	ADRB1	A1	A1
A1	SCN5A	A1	A1
A1	HTR2A	A1	A1
A1	ADRA1A	A1	A1
A1	GABRA3	A1	A1
A1	CHRM2	A1	A1
A1	ADRA1B	A1	A1
A1	GABRA1	A1	A1
A1	CHRNA7	A1	A1
A2	PGR	A1	A1
A2	NCOA2	A1	A1
A2	PTGS1	A1	A1
A2	PTGS2	A1	A1
A2	HSP90AA1	A1	A1
A2	PIK3CG	A1	A1
A2	KCNH2	A1	A1
A2	PRKACA	A1	A1
A2	DRD1	A1	A1
A2	CHRM3	A1	A1
A2	CHRM1	A1	A1
A2	SCN5A	A1	A1
A2	GABRA2	A1	A1
A2	CHRM4	A1	A1
A2	PDE3A	A1	A1
A2	HTR2A	A1	A1
A2	GABRA5	A1	A1
A2	ADRA1A	A1	A1
A2	GABRA3	A1	A1
A2	CHRM2	A1	A1
A2	ADRA1B	A1	A1
A2	ADRB2	A1	A1
A2	CHRNA2	A1	A1
A2	SLC6A4	A1	A1
A2	OPRM1	A1	A1
A2	GABRA1	A1	A1
A2	CHRNA7	A1	A1
A2	camC	A1	A1
A2	BCL2	A1	A1
A2	BAX	A1	A1
A2	CASP9	A1	A1
A2	JUN	A1	A1
A2	CASP3	A1	A1
A2	CASP8	A1	A1
A2	PRKCA	A1	A1
A2	TGFB1	A1	A1
A2	PON1	A1	A1
A2	MAP2	A1	A1
RS2	PTGS1	A1	A1
RS2	CHRM3	A1	A1
RS2	SCN5A	A1	A1
RS2	PTGS2	A1	A1
RS2	HTR3A	A1	A1
RS2	RXRA	A1	A1
RS2	ADRA1B	A1	A1
RS2	ADRB2	A1	A1
RS2	ADRA1D	A1	A1
RS2	SLC6A4	A1	A1
RS2	HSP90AB1	A1	A1
RS2	PIK3CA	A1	A1
RS2	CHRNA7	A1	A1
RS2	PRKACA	A1	A1
RS2	IGHG1	A1	A1
RS2	PRSS1	A1	A1
RS2	NCOA1	A1	A1
RS2	CALM1	A1	A1
B1	NOS2	A1	A1
B1	PTGS1	A1	A1
B1	AR	A1	A1
B1	PPARG	A2	A2
B1	PTGS2	A2	A2
B1	HSP90AA1	A2	A2
B1	PIK3CG	A2	A2
B1	PRKACA	A2	A2
B1	NCOA2	A2	A2
B1	DPP4	A2	A2
B1	PRSS1	A2	A2
B1	PGR	A2	A2
B1	F2R	A2	A2
B1	CHRM1	A2	A2
B1	NOS3	A2	A2
B1	GABRA2	A2	A2
B1	ACHE	A2	A2
B1	SLC6A2	A2	A2
B1	CHRM2	A2	A2
B1	ADRA1B	A2	A2
B1	GABRA1	A2	A2
B1	TOP2A	A2	A2
B1	F7	A2	A2
B1	CALM1	A2	A2
B1	RELA	A2	A2
B1	IKBKB	A2	A2
B1	AKT1	A2	A2
B1	BCL2	A2	A2
B1	BAX	A2	A2
B1	TNF	A2	A2
B1	JUN	A2	A2
B1	AHSA1	A2	A2
B1	CASP3	A2	A2
B1	MAPK8	A2	A2
B1	XDH	A2	A2
B1	MMP1	A2	A2
B1	STAT1	A2	A2
B1	cdk-1	A2	A2
B1	PPARG	A2	A2
B1	HMOX1	A2	A2
B1	CYP3A4	A2	A2
B1	CYP1A2	A2	A2
B1	CYP1A1	A2	A2
B1	ICAM1	A2	A2
B1	SELE	A2	A2
B1	VCAM1	A2	A2
B1	NR1I2	A2	A2
B1	CYP1B1	A2	A2
B1	ALOX5AP	A2	A2
B1	HAS2	A2	A2
B1	GSTP1	A2	A2
B1	AHR	A2	A2
B1	PSMD3	A2	A2
B1	SLC2A4	A2	A2
B1	NR1I3	A2	A2
B1	INSR	A2	A2
B1	DIO1	A2	A2
B1	PPP3CA	A2	A2
B1	PRXC1A	A2	A2
B1	GSTM1	A2	A2
B1	GSTM2	A2	A2
B1	AKR1C3	A2	A2
B1	SLPI	A2	A2
RS3	CHRM3	A2	A2
RS3	CHRM1	A2	A2
RS3	SLC6A2	A2	A2
RS3	SLC6A3	A2	A2
RS3	ADRB2	A2	A2
RS3	SLC6A4	A2	A2
RS3	GABRA1	A2	A2
RS3	DPP4	A2	A2
RS4	AR	A2	A2
RS4	NR3C2	A2	A2
RS5	PTGS1	A2	A2
RS5	PTGS2	A2	A2
RS5	HSP90AA1	A2	A2
RS6	PTGS1	A2	A2
RS6	PTGS2	A2	A2
RS6	RXRG	A2	A2
RS6	NCOA2	A2	A2
RS7	PTGS1	A2	A2
RS7	AR	A2	A2
RS7	SCN5A	A2	A2
RS7	PPARG	A2	A2
RS7	PTGS2	A2	A2
RS7	RXRA	A2	A2
RS7	PDE3A	A2	A2
RS7	ADRB2	A2	A2
RS7	GABRA1	A2	A2
RS7	DPP4	A2	A2
RS7	HSP90AA1	A2	A2
RS7	PIK3CG	A2	A2
RS7	CHRNA7	A2	A2
RS7	PRKACA	A2	A2
RS7	ACHE	A2	A2
RS8	BAX	A2	A2
RS8	TNF	A2	A2
RS8	CASP3	A2	A2
RS8	PTGS2	A2	A2
RS8	NFKBIA	A2	A2
RS8	IL1B	A2	A2
RS8	CASP1	A2	A2
RS8	IFNG	A2	A2
RS8	ADCYAP1	A2	A2
RS8	PSMG1	A2	A2
RS8	MAP2K4	A2	A2
RS8	SLC2A4	A2	A2
RS9	NR3C2	A2	A2
RS9	NCOA2	A2	A2
RS10	PTGS1	A2	A2
RS10	SCN5A	A2	A2
RS10	PTGS2	A2	A2
RS10	RXRA	A2	A2
RS10	ADRB2	A2	A2
RS10	GABRA1	A2	A2
RS10	PIK3CG	A2	A2
RS10	CHRNA7	A2	A2
RS10	PRKACA	A2	A2
RS10	NCOA2	A2	A2
RS11	NR3C1	A2	A2
RS12	KCNH2	A2	A2
RS12	SCN5A	A2	A2
RS12	F10	A2	A2
RS12	PTGS2	A2	A2
RS12	F7	A2	A2
RS12	PTPN1	A2	A2
RS12	ADRB2	A2	A2
RS12	HSP90AA1	A2	A2
RS12	NCOA1	A2	A2
RS12	KCNMA1	A2	A2
RS12	CALM1	A2	A2
RS12	PTGS1	A2	A2
RS12	RXRA	A2	A2
RS12	PDE3A	A2	A2
RS12	ADRA1D	A2	A2
RS12	PRKACA	A2	A2
RS13	PGR	A2	A2
RS14	PTGS1	A2	A2
RS14	CHRM3	A2	A2
RS14	KCNH2	A2	A2
RS14	CHRM1	A2	A2
RS14	SCN5A	A2	A2
RS14	F10	A2	A2
RS14	CHRM5	A2	A2
RS14	PTGS2	A2	A2
RS14	HTR3A	A2	A2
RS14	F7	A2	A2
RS14	CHRM4	A2	A2
RS14	OPRD1	A2	A2
RS14	HTR2A	A2	A2
RS14	ADRA1B	A2	A2
RS14	ADRB2	A2	A2
RS14	ADRA1D	A2	A2
RS14	OPRM1	A2	A2
RS14	HSP90AA1	A2	A2
RS14	PRKACA	AY1	drug3
RS14	CALM1	AY1	drug3
RS14	SLC6A4	AY1	drug3
RS14	CACNA1S	AY1	drug3
RS14	PDE3A	AY1	drug3
RS14	SLC6A3	AY1	drug3
RS14	PDE4A	AY1	drug3
RS14	TOP2A	AY1	drug3
RS14	DRD1	AY1	drug3
RS14	KDR	AY2	drug3
LZ1	NR3C2	B1	B1
LZ2	PGR	B1	B1
LZ2	NR3C2	B1	B1
LZ2	NCOA2	B1	B1
LZ3	NR3C2	B1	B1
LZ4	PGR	B1	B1
LZ5	NR3C2	B1	B1
LZ6	PGR	B1	B1
LZ6	NCOA2	B1	B1
LZ7	NR3C2	B1	B1
LZ8	PGR	B1	B1
LZ9	NR3C2	B1	B1
LZ10	NR3C2	B1	B1
LZ10	NCOA1	B1	B1
LZ11	NR3C2	B1	B1
LZ12	NR3C2	B1	B1
LZ13	PGR	B1	B1
A2	PGR	B1	B1
A2	NCOA2	B1	B1
A2	PTGS1	B1	B1
A2	PTGS2	B1	B1
A2	HSP90AA1	B1	B1
A2	PIK3CG	B1	B1
A2	KCNH2	B1	B1
A2	PRKACA	B1	B1
A2	DRD1	B1	B1
A2	CHRM3	B1	B1
A2	CHRM1	B1	B1
A2	SCN5A	B1	B1
A2	GABRA2	B1	B1
A2	CHRM4	B1	B1
A2	PDE3A	B1	B1
A2	HTR2A	B1	B1
A2	GABRA5	B1	B1
A2	ADRA1A	B1	B1
A2	GABRA3	B1	B1
A2	CHRM2	B1	B1
A2	ADRA1B	B1	B1
A2	ADRB2	B1	B1
A2	CHRNA2	B1	B1
A2	SLC6A4	B1	B1
A2	OPRM1	B1	B1
A2	GABRA1	B1	B1
A2	CHRNA7	B1	B1
A2	camC	B1	B1
A2	BCL2	B1	B1
A2	BAX	B1	B1
A2	CASP9	B1	B1
A2	JUN	B1	B1
A2	CASP3	B1	B1
A2	CASP8	B1	B1
A2	PRKCA	B1	B1
A2	TGFB1	B1	B1
A2	PON1	B1	B1
A2	MAP2	B1	B1
AY1	PTGS1	B1	B1
AY1	ESR1	B1	B1
AY1	PTGS2	B1	B1
AY1	HSP90AA1	B1	B1
AY1	PRKACA	B1	B1
AY1	DPEP1	B1	B1
AY1	PGR	B1	B1
AY1	NR3C2	B1	B1
AY1	NR3C1	B1	B1
B2	PTGS1	B1	B1
B2	PTGS2	B1	B1
B2	NCOA2	B1	B1
AY2	NCOA2	B1	B1
A2	PGR	B1	B1
A2	NCOA2	B1	B1
A2	PTGS1	B1	B1
A2	PTGS2	B1	B1
A2	HSP90AA1	B1	B1
A2	PIK3CG	B1	B1
A2	KCNH2	B1	B1
A2	PRKACA	B1	B1
A2	DRD1	B1	B1
A2	CHRM3	B1	B1
A2	CHRM1	B1	B1
A2	SCN5A	B1	B1
A2	GABRA2	B1	B1
A2	CHRM4	B1	B1
A2	PDE3A	B1	B1
A2	HTR2A	B1	B1
A2	GABRA5	B1	B1
A2	ADRA1A	B1	B1
A2	GABRA5	B1	B1
A2	CHRM2	B1	B1
A2	ADRA1B	B1	B1
A2	ADRB2	B1	B1
A2	CHRNA2	B1	B1
A2	SLC6A4	B1	B1
A2	OPRM1	B1	B1
A2	GABRA1	B1	B1
A2	CHRNA7	B1	B1
A2	camC	B1	B1
A2	BCL2	B1	B1
A2	BAX	B1	B1
A2	CASP9	B1	B1
A2	JUN	B1	B1
A2	CASP3	B1	B1
A2	CASP8	B1	B1
A2	PRKCA	B1	B1
A2	TGFB1	B1	B1
A2	PON1	B1	B1
A2	MAP2	B1	B1
A1	PGR	B1	B1
A1	NR3C2	B1	B1
A1	NCOA2	B1	B1
A1	ADH1C	B1	B1
A1	IGHG1	B1	B1
A1	RXRA	B1	B1
A1	NCOA1	B1	B1
A1	PTGS1	B1	B1
A1	PTGS2	B1	B1
A1	ADRA2A	B1	B1
A1	SLC6A2	B1	B1
A1	SLC6A3	B1	B1
A1	ADRB2	B1	B1
A1	AKR1B1	B1	B1
A1	PLAU	B1	B1
A1	LTA4H	B1	B1
A1	MAOB	B1	B1
A1	MAOA	B1	B1
A1	PRKACA	B1	B1
A1	CTRB1	B1	B1
A1	CHRM3	B2	B2
A1	CHRM1	B2	B2
A1	ADRB1	B2	B2
A1	SCN5A	B2	B2
A1	HTR2A	B2	B2
A1	ADRA1A	B2	B2
A1	GABRA3	C1	C1
A1	CHRM2	C1	C1
A1	ADRA1B	C1	C1
A1	GABRA1	C1	C1
A1	CHRNA7	C1	C1
C1	PTGS1	C1	C1
C1	AR	C1	C1
C1	PPARG	C1	C1
C1	PTGS2	C1	C1
C1	HSP90AA1	C1	C1
C1	PIK3CG	C1	C1
C1	NCOA2	C1	C1
C1	DPP4	C1	C1
C1	AKR1B1	C1	C1
C1	PRSS1	C1	C1
C1	TOP2A	C1	C1
C1	F2R	C1	C1
C1	KCNH2	C1	C1
C1	SCN5A	C1	C1
C1	F10	C1	C1
C1	ADRB2	C1	C1
C1	MMP3	C1	C1
C1	PRKACA	C1	C1
C1	F7	C1	C1
C1	NOS3	C1	C1
C1	RXRA	C1	C1
C1	ACHE	C1	C1
C1	GABRA1	C1	C1
C1	MAOB	C1	C1
C1	RELA	C1	C1
C1	EGFR	C1	C1
C1	AKT1	C1	C1
C1	VEGFA	C1	C1
C1	CCND1	C1	C1
C1	BCL2	C1	C1
C1	BCL2L1	C1	C1
C1	FOS	C1	C1
C1	CDKN1A	C1	C1
C1	EIF6	C1	C1
C1	BAX	C1	C1
C1	CASP9	C1	C1
C1	PLAU	C1	C1
C1	MMP2	C1	C1
C1	MMP9	C1	C1
C1	MAPK1	C1	C1
C1	IL10	C1	C1
C1	EGF	C1	C1
C1	RB1	C1	C1
C1	TNF	C1	C1
C1	JUN	C1	C1
C1	IL6	C1	C1
C1	AHSA1	C1	C1
C1	CASP3	C1	C1
C1	TP53	C1	C1
C1	ELK1	C1	C1
C1	NFKBIA	C1	C1
C1	POR	C1	C1
C1	ODC1	C1	C1
C1	XDH	C1	C1
C1	CASP8	C1	C1
C1	TOP1	C1	C1
C1	RAF1	C1	C1
C1	SOD1	C1	C1
C1	PRKCA	C1	C1
C1	MMP1	C1	C1
C1	HIF1A	C1	C1
C1	STAT1	C1	C1
C1	RUNX1T1	C1	C1
C1	cdk-1	C1	C1
C1	HSPA5	C1	C1
C1	ERBB2	C1	C1
C1	PPARG	C1	C1
C1	ACACA	C1	C1
C1	HMOX1	C1	C1
C1	CYP3A4	C1	C1
C1	CYP1A2	C1	C1
C1	CAV1	C1	C1
C1	MYC	C1	C1
C1	F3	C1	C1
C1	GJA1	C1	C1
C1	CYP1A1	C1	C1
C1	ICAM1	C1	C1
C1	IL1B	C1	C1
C1	CCL2	C1	C1
C1	SELE	C1	C1
C1	VCAM1	C1	C1
C1	PTGER3	C1	C1
C1	CXCL8	C1	C1
C1	PRKCB	C1	C1
C1	BIRC5	C1	C1
C1	DUOX2	C1	C1
C1	NOS3	C1	C1
C1	HSPB1	C1	C1
C1	TGFB1	C1	C1
C1	SULT1E1	C1	C1
C1	MGAM	C1	C1
C1	IL2	C1	C1
C1	NR1I2	C1	C1
C1	CYP1B1	C1	C1
C1	CCNB1	C1	C1
C1	PLAT	C1	C1
C1	THBD	C1	C1
C1	SERPINE1	C1	C1
C1	COL1A1	C1	C1
C1	IFNG	C1	C1
C1	ALOX5	C1	C1
C1	PTEN	C1	C1
C1	IL1A	C1	C1
C1	MPO	C1	C1
C1	TOP2A	C1	C1
C1	NCF1	C1	C1
C1	ABCA2	C1	C1
C1	HAS2	C1	C1
C1	GSTP1	C1	C1
C1	NFE2L2	C1	C1
C1	NQO1	C1	C1
C1	TNKS	C1	C1
C1	AHR	C1	C1
C1	PSMD3	C1	C1
C1	SLC2A4	C1	C1
C1	COL8A1	C1	C1
C1	TOP2A	C1	C1
C1	CXCL11	C1	C1
C1	CXCL2	C1	C1
C1	DCAF5	C1	C1
C1	NR1I3	C1	C1
C1	CHEK2	C1	C1
C1	INSR	C1	C1
C1	CLDN4	C1	C1
C1	PPARA	C1	C1
C1	PPARD	C1	C1
C1	HSF1	C1	C1
C1	CRP	C1	C1
C1	CXCL10	C1	C1
C1	CHUK	C1	C1
C1	SPP1	C1	C1
C1	RUNX2	C1	C1
C1	RASSF1	C1	C1
C1	E2F1	C1	C1
C1	E2F2	C1	C1
C1	ACP3	C1	C1
C1	CTSD	C1	C1
C1	IGFBP3	C1	C1
C1	IGF2	C1	C1
C1	CD40LG	C1	C1
C1	IRF1	C1	C1
C1	ERBB3	C1	C1
C1	PON1	C1	C1
C1	DIO1	C1	C1
C1	PCOLCE	C1	C1
C1	NPEPPS	C1	C1
C1	HK2	C1	C1
C1	NKX3-1	C1	C1
C1	RASA1	C1	C1
C1	PRXC1A	C1	C1
C1	GSTM1	C1	C1
C1	GSTM2	C1	C1
HJT1	PTGS1	C1	C1
HJT1	PTGS2	C1	C1
HJT1	MAOB	C1	C1
HJT1	PGR	C1	C1
HJT1	PTPN1	C1	C1
HJT1	TOP2A	C1	C1
HJT1	HSP90AA1	C1	C1
HJT1	PIK3CG	C1	C1
HJT1	CASP9	C1	C1
HJT1	CASP3	C1	C1
HJT1	TP53	C1	C1
HJT1	FASN	C1	C1
HJT1	FASLG	C1	C1
HJT1	MGST1	C1	C1
HJT1	CYP3A43	C1	C1
HJT2	PTGS2	C1	C1
HJT2	PTPN1	C1	C1
HJT2	HSP90AA1	C1	C1
HJT3	FYN	C1	C1
HJT3	RELA	C1	C1
HJT3	IKBKB	C1	C1
HJT3	IRF3	C1	C1
HJT3	TBK1	C1	C1
HJT3	AGT	C1	C1
HJT3	EGFR	C1	C1
HJT3	STAT3	C1	C1
HJT3	AKT1	C1	C1
HJT3	VEGFA	C1	C1
HJT3	FGFR1	C1	C1
HJT3	CCND1	C1	C1
HJT3	BCL2	C1	C1
HJT3	BCL2L1	C1	C1
HJT3	FOS	C1	C1
HJT3	CDKN1A	C1	C1
HJT3	EIF6	C1	C1
HJT3	BAX	C1	C1
HJT3	CASP9	C1	C1
HJT3	FLT1	C1	C1
HJT3	KDR	C1	C1
HJT3	EGR1	C1	C1
HJT3	RPSA	C1	C1
HJT3	PDGFB	C1	C1
HJT3	PLAU	C1	C1
HJT3	MMP2	C1	C1
HJT3	MMP9	C1	C1
HJT3	MAPK3	C1	C1
HJT3	MAPK1	C1	C1
HJT3	IL10	C1	C1
HJT3	EGF	C1	C1
HJT3	FGF10	C1	C1
HJT3	RB1	C1	C1
HJT3	CDK4	C1	C1
HJT3	PDGFRB	C1	C1
HJT3	TNF	C1	C1
HJT3	JUN	C1	C1
HJT3	IL6	C1	C1
HJT3	NOS2	C1	C1
HJT3	CDK6	C1	C1
HJT3	EEF1E1	C1	C1
HJT3	AHSA1	C1	C1
HJT3	CASP3	C1	C1
HJT3	TP53	C1	C1
HJT3	ELANE	C1	C1
HJT3	MMP14	C1	C1
HJT3	ELK1	C1	C1
HJT3	MAP2K1	C1	C1
HJT3	IVL	C1	C1
HJT3	MAPK8	C1	C1
HJT3	PLCG1	C1	C1
HJT3	PTGS2	C1	C1
HJT3	NFKBIA	C1	C1
HJT3	RPS6KB1	C1	C1
HJT3	POR	C1	C1
HJT3	ODC1	C1	C1
HJT3	XDH	C1	C1
HJT3	CASP8	C1	C1
HJT3	FASN	C1	C1
HJT3	TOP1	C1	C1
HJT3	LDLR	C1	C1
HJT3	MDM2	C1	C1
HJT3	RASGRF2	C1	C1
HJT3	RAF1	C1	C1
HJT3	BAK1	C1	C1
HJT3	BCL2L10	C1	C1
HJT3	BBC3	C1	C1
HJT3	MAP3K1	C1	C1
HJT3	BCL2L2	C1	C1
HJT3	BAD	C1	C1
HJT3	COMT	C1	C1
HJT3	SOD1	C1	C1
HJT3	CAT	C1	C1
HJT3	SAA1	C1	C1
HJT3	PRKCA	C1	C1
HJT3	PRKCE	C1	C1
HJT3	TEP1	C1	C1
HJT3	HTT	C1	C1
HJT3	TIMP1	C1	C1
HJT3	TIMP2	C1	C1
HJT3	TDP1	C1	C1
HJT3	GDPD5	C1	C1
HJT3	MMP1	C1	C1
HJT3	MMP3	C1	C1
HJT3	MMP13	C1	C1
HJT3	CDKN1C	C1	C1
HJT3	HIF1A	C1	C1
HJT3	IGF1R	C1	C1
HJT3	STAT1	C1	C1
HJT3	FOSL1	C1	C1
HJT3	FOSL2	C1	C1
HJT3	FOSB	C1	C1
HJT3	JUNB	C1	C1
HJT3	JUND	C1	C1
HJT3	RUNX1T1	C1	C1
HJT3	PCNA	C1	C1
HJT3	ARHGAP35	C1	C1
HJT3	MMP7	C1	C1
HJT3	EPHA2	C1	C1
HJT3	EDNRA	C1	C1
HJT3	EDN1	C1	C1
HJT3	VIM	C1	C1
HJT3	HSPA5	C1	C1
HJT3	ERBB2	C1	C1
HJT3	RPS6KA1	C1	C1
HJT3	FOXO1	C1	C1
HJT3	CD4	C1	C1
HJT3	DHFR	C1	C1
HJT3	PIM2	C1	C1
HJT3	FGF2	C1	C1
HJT3	HOXD1	C1	C1
HJT3	FAS	C1	C1
HJT3	MADD	C1	C1
HJT3	CYP3A7	C1	C1
HJT3	OXSM	C1	C1
HJT3	ESR1	C1	C1
HJT3	FCER1A	C1	C1
HJT3	PPARG	C1	C1
HJT3	CEBPA	C1	C1
HJT3	TLR4	C1	C1
HJT3	ACACA	C1	C1
HJT3	SP1	C1	C1
HJT3	ME1	C1	C1
HJT3	G6PD	C1	C1
HJT3	SREBF2	C1	C1
HJT3	SRD5A2	C1	C1
HJT3	CAV1	C1	C1
HJT3	CREB1	C1	C1
HJT3	IL6ST	C1	C1
HJT3	CDH1	GQZ1	drug5
HJT3	CYP7A1	GQZ1	drug5
HJT3	MAPK7	GQZ1	drug5
HJT3	MUC5AC	GQZ1	drug5
HJT3	CAMKK2	GQZ1	drug5
B1	NOS2	GQZ1	drug5
B1	PTGS1	GQZ10	drug5
B1	AR	GQZ11	drug5
B1	PPARG	GQZ12	drug5
B1	PTGS2	GQZ12	drug5
B1	HSP90AA1	GQZ12	drug5
B1	PIK3CG	GQZ12	drug5
B1	PRKACA	GQZ12	drug5
B1	NCOA2	GQZ12	drug5
B1	DPP4	GQZ12	drug5
B1	PRSS1	GQZ12	drug5
B1	PGR	GQZ12	drug5
B1	F2R	GQZ12	drug5
B1	CHRM1	GQZ12	drug5
B1	NOS3	GQZ12	drug5
B1	GABRA2	GQZ12	drug5
B1	ACHE	GQZ12	drug5
B1	SLC6A2	GQZ12	drug5
B1	CHRM2	GQZ12	drug5
B1	ADRA1B	GQZ12	drug5
B1	GABRA1	GQZ12	drug5
B1	TOP2A	GQZ12	drug5
B1	F7	GQZ12	drug5
B1	CALM1	GQZ12	drug5
B1	RELA	GQZ12	drug5
B1	IKBKB	GQZ12	drug5
B1	AKT1	GQZ13	drug5
B1	BCL2	GQZ13	drug5
B1	BAX	GQZ13	drug5
B1	TNF	GQZ13	drug5
B1	JUN	GQZ14	drug5
B1	AHSA1	GQZ14	drug5
B1	CASP3	GQZ14	drug5
B1	MAPK8	GQZ15	drug5
B1	XDH	GQZ16	drug5
B1	MMP1	GQZ16	drug5
B1	STAT1	GQZ17	drug5
B1	cdk-1	GQZ18	drug5
B1	PPARG	GQZ19	drug5
B1	HMOX1	GQZ19	drug5
B1	CYP3A4	GQZ19	drug5
B1	CYP1A2	GQZ2	drug5
B1	CYP1A1	GQZ20	drug5
B1	ICAM1	GQZ21	drug5
B1	SELE	GQZ21	drug5
B1	VCAM1	GQZ21	drug5
B1	NR1I2	GQZ22	drug5
B1	CYP1B1	GQZ23	drug5
B1	ALOX5AP	GQZ24	drug5
B1	HAS2	GQZ25	drug5
B1	GSTP1	GQZ25	drug5
B1	AHR	GQZ25	drug5
B1	PSMD3	GQZ26	drug5
B1	SLC2A4	GQZ27	drug5
B1	NR1I3	GQZ27	drug5
B1	INSR	GQZ27	drug5
B1	DIO1	GQZ28	drug5
B1	PPP3CA	GQZ28	drug5
B1	PRXC1A	GQZ28	drug5
B1	GSTM1	GQZ28	drug5
B1	GSTM2	GQZ28	drug5
B1	AKR1C3	GQZ29	drug5
B1	SLPI	GQZ29	drug5
HJT4	IGF2	GQZ29	drug5
HJT4	CD40LG	GQZ29	drug5
HJT4	IRF1	GQZ29	drug5
HJT4	ERBB3	GQZ29	drug5
HJT4	PON1	GQZ29	drug5
HJT4	DIO1	GQZ29	drug5
HJT4	PCOLCE	GQZ29	drug5
HJT4	NPEPPS	GQZ29	drug5
HJT4	HK2	GQZ29	drug5
HJT4	NKX3-1	GQZ29	drug5
HJT4	RASA1	GQZ29	drug5
HJT4	GSTM1	GQZ29	drug5
HJT4	GSTM2	GQZ29	drug5
HJT4	HTR3A	GQZ29	drug5
HJT4	F7	GQZ29	drug5
HJT4	CHRM4	GQZ29	drug5
HJT4	OPRD1	GQZ29	drug5
HJT4	ADRA1B	GQZ29	drug5
HJT4	ADRB2	GQZ29	drug5
HJT4	ADRA1D	GQZ29	drug5
HJT4	OPRM1	GQZ29	drug5
HJT4	LGALS8	GQZ29	drug5
HJT4	GAPDH	GQZ29	drug5
HJT4	PTGES2	GQZ29	drug5
HJT4	SLC6A4	GQZ29	drug5
HJT4	CACNA1S	GQZ3	drug5
HJT4	PDE3A	GQZ3	drug5
HJT4	SLC6A3	GQZ30	drug5
HJT4	CDKN2A	GQZ31	drug5
HJT4	ADORA3	GQZ32	drug5
HJT4	KDM4C	GQZ32	drug5
HJT4	KDR	GQZ33	drug5
HJT4	STAT3	GQZ33	drug5
HJT4	DPP4	GQZ34	drug5
HJT4	FOLH1	GQZ34	drug5
HJT4	PYGM	GQZ34	drug5
HJT4	HDAC1	GQZ4	drug5
HJT4	GAA	GQZ4	drug5
HJT4	CDK1	GQZ4	drug5
HJT4	HSPA5	GQZ5	drug5
HJT4	AKR1C3	GQZ5	drug5
HJT5	PPM1B	GQZ5	drug5
HJT5	PPP1CC	GQZ5	drug5
HJT5	PPP2R5A	GQZ5	drug5
HJT5	ADORA1	GQZ5	drug5
HJT5	PTAFR	GQZ5	drug5
HJT5	ADORA2A	GQZ5	drug5
HJT5	ADORA2B	GQZ5	drug5
HJT5	ADORA3	GQZ5	drug5
HJT5	RORC	GQZ5	drug5
HJT5	ATP1A1	GQZ5	drug5
HJT5	STAT3	GQZ5	drug5
HJT5	SLC5A2	GQZ5	drug5
HJT5	SLC29A1	GQZ5	drug5
HJT5	HRAS	GQZ5	drug5
HJT5	TNF	GQZ5	drug5
HJT5	CHIA	GQZ5	drug5
HJT5	MAPK14	GQZ5	drug5
HJT5	VEGFA	GQZ5	drug5
HJT5	FGF1	GQZ5	drug5
HJT5	FGF2	GQZ5	drug5
HJT5	HPSE	GQZ5	drug5
HJT5	SLC5A1	GQZ5	drug5
HJT6	EDNRA	GQZ5	drug5
HJT6	HSP90AB1	GQZ6	drug5
HJT6	GSK3B	GQZ7	drug5
HJT6	GCGR	GQZ8	drug5
HJT6	ADORA2A	GQZ9	drug5
HJT6	ADORA2B	GQZ9	drug5
HJT6	EDNRB	GQZ9	drug5
HJT6	BRAF	HJT1	drug4
HJT6	SHBG	HJT1	drug4
HJT6	HSP90AA1	HJT1	drug4
HJT6	ABL1	HJT1	drug4
HJT6	PIK3CD	HJT1	drug4
HJT6	PRKDC	HJT1	drug4
HJT6	HCK	HJT1	drug4
HJT6	SYK	HJT1	drug4
HJT6	CHEK1	HJT1	drug4
HJT6	WEE1	HJT1	drug4
HJT6	HDAC3	HJT1	drug4
HJT6	HDAC6	HJT1	drug4
HJT6	EIF2AK3	HJT1	drug4
HJT7	CDK2	HJT1	drug4
HJT7	ESR1	HJT1	drug4
HJT7	AR	HJT2	drug4
HJT7	PGR	HJT2	drug4
HJT7	HSP90AA1	HJT2	drug4
HJT7	RELA	HJT3	drug4
HJT7	VEGFA	HJT3	drug4
HJT7	CDKN1A	HJT3	drug4
HJT7	MMP2	HJT3	drug4
HJT7	MMP9	HJT3	drug4
HJT7	NFKBIA	HJT3	drug4
HJT7	CXCL8	HJT3	drug4
HJT7	PRKCB	HJT3	drug4
HJT7	GSTP1	HJT3	drug4
HJT7	IGF2	HJT3	drug4
HJT7	GSTM1	HJT3	drug4
HJT7	GSTM2	HJT3	drug4
HJT7	GSTA1	HJT3	drug4
HJT7	GSTA2	HJT3	drug4
HJT8	PTGS1	HJT3	drug4
HJT8	ESR1	HJT3	drug4
HJT8	PTGS2	HJT3	drug4
HJT8	HSP90AA1	HJT3	drug4
HJT8	PRKACA	HJT3	drug4
GQZ1	PGR	HJT3	drug4
GQZ1	PTGS2	HJT3	drug4
GQZ1	GABRA1	HJT3	drug4
GQZ1	ADH1C	HJT3	drug4
GQZ1	camC	HJT3	drug4
GQZ1	NR3C2	HJT3	drug4
GQZ2	NR3C2	HJT3	drug4
B2	PTGS1	HJT3	drug4
B2	PTGS2	HJT3	drug4
B2	NCOA2	HJT3	drug4
GQZ3	PTGS1	HJT3	drug4
GQZ3	NCOA2	HJT3	drug4
GQZ4	PGR	HJT3	drug4
GQZ4	NR3C2	HJT3	drug4
GQZ4	NCOA2	HJT3	drug4
A1	PGR	HJT3	drug4
A1	NR3C2	HJT3	drug4
A1	NCOA2	HJT3	drug4
A1	ADH1C	HJT3	drug4
A1	IGHG1	HJT3	drug4
A1	RXRA	HJT3	drug4
A1	NCOA1	HJT3	drug4
A1	PTGS1	HJT3	drug4
A1	PTGS2	HJT3	drug4
A1	ADRA2A	HJT3	drug4
A1	SLC6A2	HJT3	drug4
A1	SLC6A3	HJT3	drug4
A1	ADRB2	HJT3	drug4
A1	AKR1B10	HJT3	drug4
A1	PLAU	HJT3	drug4
A1	LTA4H	HJT3	drug4
A1	MAOB	HJT3	drug4
A1	MAOA	HJT3	drug4
A1	PRKACA	HJT3	drug4
A1	CTRB1	HJT3	drug4
A1	CHRM3	HJT3	drug4
A1	CHRM1	HJT3	drug4
A1	ADRB1	HJT3	drug4
A1	SCN5A	HJT3	drug4
A1	HTR2A	HJT3	drug4
A1	ADRA1A	HJT3	drug4
A1	HTR2A	HJT3	drug4
A1	CHRM2	HJT3	drug4
A1	ADRA1B	HJT3	drug4
A1	GABRA1	HJT3	drug4
A1	CHRNA7	HJT3	drug4
A2	PGR	HJT3	drug4
A2	NCOA2	HJT3	drug4
A2	PTGS1	HJT3	drug4
A2	PTGS2	HJT3	drug4
A2	HSP90AA1	HJT3	drug4
A2	PIK3CG	HJT3	drug4
A2	KCNH2	HJT3	drug4
A2	PRKACA	HJT3	drug4
A2	DRD1	HJT3	drug4
A2	CHRM3	HJT3	drug4
A2	CHRM1	HJT3	drug4
A2	SCN5A	HJT3	drug4
A2	GABRA2	HJT3	drug4
A2	CHRM4	HJT3	drug4
A2	PDE3A	HJT3	drug4
A2	HTR2A	HJT3	drug4
A2	GABRA5	HJT3	drug4
A2	ADRA1A	HJT3	drug4
A2	GABRA3	HJT3	drug4
A2	CHRM2	HJT3	drug4
A2	ADRA1B	HJT3	drug4
A2	ADRB2	HJT3	drug4
A2	CHRNA2	HJT3	drug4
A2	SLC6A4	HJT3	drug4
A2	OPRM1	HJT3	drug4
A2	GABRA1	HJT3	drug4
A2	CHRNA7	HJT3	drug4
A2	camC	HJT3	drug4
A2	BCL2	HJT3	drug4
A2	BAX	HJT3	drug4
A2	CASP9	HJT3	drug4
A2	JUN	HJT3	drug4
A2	CASP3	HJT3	drug4
A2	CASP8	HJT3	drug4
A2	PRKCA	HJT3	drug4
A2	TGFB1	HJT3	drug4
A2	PON1	HJT3	drug4
A2	MAP2	HJT3	drug4
GQZ5	DRD1	HJT3	drug4
GQZ5	CHRM3	HJT3	drug4
GQZ5	CHRM1	HJT3	drug4
GQZ5	ADRB1	HJT3	drug4
GQZ5	CHRM5	HJT3	drug4
GQZ5	ADRA2A	HJT3	drug4
GQZ5	ADRA2C	HJT3	drug4
GQZ5	CHRM4	HJT3	drug4
GQZ5	OPRD1	HJT3	drug4
GQZ5	HTR2A	HJT3	drug4
GQZ5	SLC6A2	HJT3	drug4
GQZ5	ADRA1A	HJT3	drug4
GQZ5	HTR2C	HJT3	drug4
GQZ5	CHRM2	HJT3	drug4
GQZ5	ADRA2B	HJT3	drug4
GQZ5	ADRA1B	HJT3	drug4
GQZ5	SLC6A3	HJT3	drug4
GQZ5	ADRB2	HJT3	drug4
GQZ5	SLC6A4	HJT3	drug4
GQZ5	DRD2	HJT3	drug4
GQZ5	OPRM1	HJT3	drug4
GQZ5	GABRA1	HJT3	drug4
GQZ5	HTR1B	HJT3	drug4
GQZ5	HRH1	HJT3	drug4
GQZ5	HTR1A	HJT3	drug4
GQZ6	PGR	HJT3	drug4
GQZ7	PTGS2	HJT3	drug4
GQZ8	HSP90AA1	HJT3	drug4
GQZ9	PGR	HJT3	drug4
GQZ9	NCOA2	HJT3	drug4
GQZ9	NR3C2	HJT3	drug4
GQZ10	PGR	HJT4	drug4
GQZ11	NCOA2	HJT4	drug4
GQZ12	PTGS1	HJT4	drug4
GQZ12	ESR1	HJT4	drug4
GQZ12	AR	HJT4	drug4
GQZ12	PPARG	HJT4	drug4
GQZ12	PTGS2	HJT4	drug4
GQZ12	RXRA	HJT4	drug4
GQZ12	PDE3A	HJT4	drug4
GQZ12	ESR2	HJT4	drug4
GQZ12	MAPK14	HJT4	drug4
GQZ12	GSK3B	HJT4	drug4
GQZ12	HSP90AA1	HJT4	drug4
GQZ12	CDK2	HJT4	drug4
GQZ12	CHEK1	HJT4	drug4
GQZ12	PRSS1	HJT4	drug4
GQZ12	PIM1	HJT4	drug4
GQZ12	CCNA2	HJT4	drug4
GQZ12	CALM1	HJT4	drug4
GQZ12	PRKACA	HJT4	drug4
GQZ12	NCOA1	HJT4	drug4
GQZ12	NOS2	HJT4	drug4
GQZ12	APP	HJT4	drug4
GQZ12	MMP13	HJT4	drug4
GQZ12	MMP8	HJT4	drug4
GQZ13	PGR	HJT4	drug4
GQZ13	NR3C2	HJT4	drug4
GQZ13	camC	HJT4	drug4
GQZ13	NCOA2	HJT4	drug4
GQZ14	PTGS2	HJT4	drug4
GQZ14	PGR	HJT4	drug4
GQZ14	NCOA2	HJT4	drug4
GQZ15	PGR	HJT4	drug4
GQZ16	PGR	HJT4	drug4
GQZ16	NR3C2	HJT4	drug4
GQZ17	PGR	HJT4	drug4
GQZ18	PGR	HJT4	drug4
GQZ19	PGR	HJT4	drug4
GQZ19	NR3C2	HJT4	drug4
GQZ19	NCOA2	HJT4	drug4
GQZ20	PGR	HJT4	drug4
GQZ21	PGR	HJT5	drug4
GQZ21	NR3C2	HJT5	drug4
GQZ21	NCOA2	HJT5	drug4
GQZ22	PGR	HJT5	drug4
GQZ23	PGR	HJT5	drug4
GQZ24	PGR	HJT5	drug4
GQZ25	PGR	HJT5	drug4
GQZ25	NR3C2	HJT5	drug4
GQZ25	NCOA2	HJT5	drug4
GQZ26	PGR	HJT5	drug4
GQZ27	PGR	HJT5	drug4
GQZ27	NR3C2	HJT5	drug4
GQZ27	NR3C1	HJT5	drug4
GQZ28	PTGS2	HJT5	drug4
GQZ28	TOP2A	HJT5	drug4
GQZ28	HSP90AA1	HJT5	drug4
GQZ28	NCOA2	HJT5	drug4
GQZ28	CALM1	HJT5	drug4
GQZ29	DRD1	HJT5	drug4
GQZ29	CHRM3	HJT5	drug4
GQZ29	CHRM1	HJT5	drug4
GQZ29	DRD5	HJT5	drug4
GQZ29	ADRB1	HJT6	drug4
GQZ29	SCN5A	HJT6	drug4
GQZ29	CHRM5	HJT6	drug4
GQZ29	ADRA2A	HJT6	drug4
GQZ29	HTR1A	HJT6	drug4
GQZ29	ADRA2C	HJT6	drug4
GQZ29	CHRM4	HJT6	drug4
GQZ29	OPRD1	HJT6	drug4
GQZ29	HRH1	HJT6	drug4
GQZ29	HTR2A	HJT6	drug4
GQZ29	SLC6A2	HJT6	drug4
GQZ29	ADRA1A	HJT6	drug4
GQZ29	HTR2C	HJT6	drug4
GQZ29	CHRM2	HJT6	drug4
GQZ29	ADRA2B	HJT6	drug4
GQZ29	ADRA1B	HJT6	drug4
GQZ29	SLC6A3	HJT6	drug4
GQZ29	ADRB2	HJT6	drug4
GQZ29	SLC6A4	HJT6	drug4
GQZ29	DRD2	HJT6	drug4
GQZ29	OPRM1	HJT7	drug4
GQZ29	GABRA1	HJT7	drug4
GQZ29	HTR1B	HJT7	drug4
GQZ30	NCOA2	HJT7	drug4
GQZ31	TOP2A	HJT7	drug4
GQZ32	PGR	HJT7	drug4
GQZ32	NR3C2	HJT7	drug4
GQZ33	PGR	HJT7	drug4
GQZ33	NR3C2	HJT7	drug4
GQZ34	PGR	HJT7	drug4
GQZ34	NR3C2	HJT7	drug4
GQZ34	NCOA2	HJT7	drug4
C1	PTGS1	HJT7	drug4
C1	AR	HJT7	drug4
C1	PPARG	HJT7	drug4
C1	PTGS2	HJT7	drug4
C1	HSP90AA1	HJT7	drug4
C1	PIK3CG	HJT7	drug4
C1	NCOA2	HJT7	drug4
C1	DPP4	HJT8	drug4
C1	AKR1B10	HJT8	drug4
C1	PRSS1	HJT8	drug4
C1	TOP2A	HJT8	drug4
C1	F2R	HJT8	drug4
C1	KCNH2	LZ1	drug2
C1	SCN5A	LZ10	drug2
C1	F10	LZ10	drug2
C1	ADRB2	LZ11	drug2
C1	MMP3	LZ12	drug2
C1	PRKACA	LZ13	drug2
C1	F7	LZ2	drug2
C1	NOS3	LZ2	drug2
C1	RXRA	LZ2	drug2
C1	ACHE	LZ3	drug2
C1	GABRA1	LZ4	drug2
C1	MAOB	LZ5	drug2
C1	RELA	LZ6	drug2
C1	EGFR	LZ6	drug2
C1	AKT1	LZ7	drug2
C1	VEGFA	LZ8	drug2
C1	CCND1	LZ9	drug2
C1	BCL2	RS1	drug1
C1	BCL2L1	RS1	drug1
C1	FOS	RS1	drug1
C1	CDKN1A	RS10	drug1
C1	EIF6	RS10	drug1
C1	BAX	RS10	drug1
C1	CASP9	RS10	drug1
C1	PLAU	RS10	drug1
C1	MMP2	RS10	drug1
C1	MMP9	RS10	drug1
C1	MAPK1	RS10	drug1
C1	IL10	RS10	drug1
C1	EGF	RS10	drug1
C1	RB1	RS11	drug1
C1	TNF	RS12	drug1
C1	JUN	RS12	drug1
C1	IL6	RS12	drug1
C1	AHSA1	RS12	drug1
C1	CASP3	RS12	drug1
C1	TP53	RS12	drug1
C1	ELK1	RS12	drug1
C1	NFKBIA	RS12	drug1
C1	POR	RS12	drug1
C1	ODC1	RS12	drug1
C1	XDH	RS12	drug1
C1	CASP8	RS12	drug1
C1	TOP1	RS12	drug1
C1	RAF1	RS12	drug1
C1	SOD1	RS12	drug1
C1	PRKCA	RS12	drug1
C1	MMP1	RS13	drug1
C1	HIF1A	RS14	drug1
C1	STAT1	RS14	drug1
C1	RUNX1T1	RS14	drug1
C1	cdk-1	RS14	drug1
C1	HSPA5	RS14	drug1
C1	ERBB2	RS14	drug1
C1	PPARG	RS14	drug1
C1	ACACA	RS14	drug1
C1	HMOX1	RS14	drug1
C1	CYP3A4	RS14	drug1
C1	CYP1A2	RS14	drug1
C1	CAV1	RS14	drug1
C1	MYC	RS14	drug1
C1	F3	RS14	drug1
C1	GJA1	RS14	drug1
C1	CYP1A1	RS14	drug1
C1	ICAM1	RS14	drug1
C1	IL1B	RS14	drug1
C1	CCL2	RS14	drug1
C1	SELE	RS14	drug1
C1	VCAM1	RS14	drug1
C1	PTGER3	RS14	drug1
C1	CXCL8	RS14	drug1
C1	PRKCB	RS14	drug1
C1	BIRC5	RS14	drug1
C1	DUOX2	RS14	drug1
C1	NOS3	RS14	drug1
C1	HSPB1	RS14	drug1
C1	TGFB1	RS2	drug1
C1	SULT1E1	RS2	drug1
C1	MGAM	RS2	drug1
C1	IL2	RS2	drug1
C1	NR1I2	RS2	drug1
C1	CYP1B1	RS2	drug1
C1	CCNB1	RS2	drug1
C1	PLAT	RS2	drug1
C1	THBD	RS2	drug1
C1	SERPINE1	RS2	drug1
C1	COL1A1	RS2	drug1
C1	IFNG	RS2	drug1
C1	ALOX5	RS2	drug1
C1	PTEN	RS2	drug1
C1	IL1A	RS2	drug1
C1	MPO	RS2	drug1
C1	TOP2A	RS2	drug1
C1	NCF1	RS2	drug1
C1	ABCA2	RS3	drug1
C1	HAS2	RS3	drug1
C1	GSTP1	RS3	drug1
C1	NFE2L2	RS3	drug1
C1	NQO1	RS3	drug1
C1	TNKS	RS3	drug1
C1	AHR	RS3	drug1
C1	PSMD3	RS3	drug1
C1	SLC2A4	RS4	drug1
C1	COL8A1	RS4	drug1
C1	TOP2A	RS5	drug1
C1	CXCL11	RS5	drug1
C1	CXCL2	RS5	drug1
C1	DCAF5	RS6	drug1
C1	NR1I3	RS6	drug1
C1	CHEK2	RS6	drug1
C1	INSR	RS6	drug1
C1	CLDN4	RS7	drug1
C1	PPARA	RS7	drug1
C1	PPARD	RS7	drug1
C1	HSF1	RS7	drug1
C1	CRP	RS7	drug1
C1	CXCL10	RS7	drug1
C1	CHUK	RS7	drug1
C1	SPP1	RS7	drug1
C1	RUNX2	RS7	drug1
C1	RASSF1	RS7	drug1
C1	E2F1	RS7	drug1
C1	E2F2	RS7	drug1
C1	ACP3	RS7	drug1
C1	CTSD	RS7	drug1
C1	IGFBP3	RS7	drug1
C1	IGF2	RS8	drug1
C1	CD40LG	RS8	drug1
C1	IRF1	RS8	drug1
C1	ERBB3	RS8	drug1
C1	PON1	RS8	drug1
C1	DIO1	RS8	drug1
C1	PCOLCE	RS8	drug1
C1	NPEPPS	RS8	drug1
C1	HK2	RS8	drug1
C1	NKX3-1	RS8	drug1
C1	RASA1	RS8	drug1
C1	PRXC1A	RS8	drug1
C1	GSTM1	RS9	drug1
C1	GSTM2	RS9	drug1
RS	RS1	SCN5A	gene
RS	RS2	ADRB2	gene
RS	RS3	CHRM3	gene
RS	RS4	PGR	gene
RS	RS5	NR3C2	gene
RS	RS6	NCOA2	gene
RS	RS7	ADH1C	gene
RS	RS8	IGHG1	gene
RS	RS9	RXRA	gene
RS	RS10	NCOA1	gene
RS	RS11	PTGS1	gene
RS	RS12	PTGS2	gene
RS	RS13	ADRA2A	gene
RS	RS14	SLC6A2	gene
RS	A1	SLC6A3	gene
RS	A2	ADRB2	gene
RS	B1	AKR1B10	gene
LZ	LZ1	PLAU	gene
LZ	LZ2	LTA4H	gene
LZ	LZ3	MAOB	gene
LZ	LZ4	MAOA	gene
LZ	LZ5	PRKACA	gene
LZ	LZ6	CTRB1	gene
LZ	LZ7	CHRM3	gene
LZ	LZ8	CHRM1	gene
LZ	LZ9	ADRB1	gene
LZ	LZ10	SCN5A	gene
LZ	LZ11	HTR2A	gene
LZ	LZ12	ADRA1A	gene
LZ	LZ13	GABRA3	gene
LZ	A2	CHRM2	gene
AY	AY1	ADRA1B	gene
AY	AY2	GABRA1	gene
AY	A1	CHRNA7	gene
AY	A2	PGR	gene
AY	B2	NCOA2	gene
AY	C1	PTGS1	gene
HJT	HJT1	PTGS2	gene
HJT	HJT2	HSP90AA1	gene
HJT	HJT3	PIK3CG	gene
HJT	HJT4	KCNH2	gene
HJT	HJT5	PRKACA	gene
HJT	HJT6	DRD1	gene
HJT	HJT7	CHRM3	gene
HJT	HJT8	CHRM1	gene
HJT	B1	SCN5A	gene
GQZ	GQZ1	GABRA2	gene
GQZ	GQZ2	CHRM4	gene
GQZ	GQZ3	PDE3A	gene
GQZ	GQZ4	HTR2A	gene
GQZ	GQZ5	GABRA5	gene
GQZ	GQZ6	ADRA1A	gene
GQZ	GQZ7	GABRA3	gene
GQZ	GQZ8	CHRM2	gene
GQZ	GQZ9	ADRA1B	gene
GQZ	GQZ10	ADRB2	gene
GQZ	GQZ11	CHRNA2	gene
GQZ	GQZ12	SLC6A4	gene
GQZ	GQZ13	OPRM1	gene
GQZ	GQZ14	GABRA1	gene
GQZ	GQZ15	CHRNA7	gene
GQZ	GQZ16	camC	gene
GQZ	GQZ17	BCL2	gene
GQZ	GQZ18	BAX	gene
GQZ	GQZ19	CASP9	gene
GQZ	GQZ20	JUN	gene
GQZ	GQZ21	CASP3	gene
GQZ	GQZ22	CASP8	gene
GQZ	GQZ23	PRKCA	gene
GQZ	GQZ24	TGFB1	gene
GQZ	GQZ25	PON1	gene
GQZ	GQZ26	MAP2	gene
GQZ	GQZ27	PTGS1	gene
GQZ	GQZ28	CHRM3	gene
GQZ	GQZ29	SCN5A	gene
GQZ	GQZ30	PTGS2	gene
GQZ	GQZ31	HTR3A	gene
GQZ	GQZ32	RXRA	gene
GQZ	GQZ33	ADRA1B	gene
GQZ	GQZ34	ADRB2	gene
GQZ	A1	ADRA1D	gene
GQZ	A2	SLC6A4	gene
GQZ	B2	HSP90AB1	gene
GQZ	C1	PIK3CA	gene

## Sheet: Supplementary Material 4
Supplementary Material 4
Information on the 140 intersection targets of AIDS and JAKCP140 intersection targets of AIDS and JAKCP
JAKCP targets	AIDS targets	AIDS-JAKCP intersection targets
SCN5A	CXCL12	VIM
ADRB2	IL10	VEGFA
CHRM3	IFNG	VCAM1
PGR	AICDA	TP53
NR3C2	CCR5	TOP2A
NCOA2	CCL3	TNF
ADH1C	CD4	TLR4
IGHG1	TNF	TIMP1
RXRA	HLA-C	TGFB1
NCOA1	IL6	STAT3
PTGS1	CCL2	STAT1
PTGS2	CX3CR1	SPP1
ADRA2A	CD209	SP1
SLC6A2	IL4R	SOD1
SLC6A3	CCL3L1	SLPI
AKR1B10	CXCR4	SLC6A4
PLAU	CCL11	SLC6A3
LTA4H	KIR3DL1	SERPINE1
MAOB	B2M	SELE
MAOA	ITIH4	RXRG
PRKACA	CCR2	RELA
CTRB1	HLA-B	RB1
CHRM1	CXCR1	RAF1
ADRB1	CD9	PTGS2
HTR2A	CCL5	PTGS1
ADRA1A	TLR3	PTEN
GABRA3	IL2	PRKDC
CHRM2	IFNA1	PRKCA
ADRA1B	HLA-A	PRKACA
GABRA1	IL1B	PPARG
CHRNA7	IL4	PLAU
HSP90AA1	CCR3	PLAT
PIK3CG	TAT	PIK3CG
KCNH2	CCL4	PIK3CA
DRD1	ALB	PGR
GABRA2	APOBEC3G	PDGFRB
CHRM4	TP53	PDGFB
PDE3A	CSF2	PCNA
GABRA5	CXCL8	OPRM1
CHRNA2	CYP2B6	NR3C2
SLC6A4	CYP3A4	NR3C1
OPRM1	ABCB1	NR1I2
camC	NFKB1	NOS3
BCL2	BCL6	NOS2
BAX	IL2RA	NFKBIA
CASP9	HLA-DRB1	MYC
JUN	CSF3	MPO
CASP3	OSM	MMP9
CASP8	MYC	MMP7
PRKCA	CXCL10	MMP2
TGFB1	IFNA2	MMP1
PON1	MAPK1	MDM2
MAP2	EPO	MAPK8
HTR3A	DHPS	MAPK3
ADRA1D	TKT	MAPK14
HSP90AB1	CD40LG	MAPK1
PIK3CA	BST2	MAP2K1
PRSS1	IL12B	MAP2
CALM1	BCL2	LDLR
NOS2	DHFR	KDR
AR	ERVW-1	JUN
PPARG	CASP8	IRF3
DPP4	CRP	INSR
F2R	S100B	IL6ST
NOS3	STAT3	IL6
ACHE	CD40	IL2
TOP2A	LTA	IL1B
F7	IL16	IL1A
RELA	CDK9	IL10
IKBKB	APOE	IKBKB
AKT1	IL1A	IFNG
TNF	FGF2	ICAM1
AHSA1	ADA	HTR2A
MAPK8	MBL2	HSPB1
XDH	NOS2	HSPA5
MMP1	VEGFA	HSP90AA1
STAT1	CASP3	HRAS
cdk-1	HLA-G	HIF1A
HMOX1	TGFB1	HCK
CYP3A4	IL7	GSTP1
CYP1A2	STAT1	GAA
CYP1A1	HCK	FYN
ICAM1	NR3C1	FOS
SELE	ICAM1	FLT1
VCAM1	IL1R1	FGFR1
NR1I2	IL13	FGF2
CYP1B1	HLA-DQB1	FGF1
ALOX5AP	MAPK3	FASN
HAS2	IL15	FASLG
GSTP1	CCNT1	FAS
AHR	IDO1	F3
PSMD3	VCAM1	ESR1
SLC2A4	FAS	ERBB2
NR1I3	UNG	ELANE
INSR	BAX	EGFR
DIO1	CCR1	EGF
PPP3CA	IL5	EDNRB
PRXC1A	APOBEC3F	EDN1
GSTM1	TFRC	DRD2
GSTM2	PAK2	DPP4
AKR1C3	CLEC12A	DHFR
SLPI	IL18	CYP3A7
RXRG	CD38	CYP3A4
NFKBIA	SLPI	CYP1B1
IL1B	KAT5	CYP1A2
CASP1	CD79A	CXCL8
IFNG	ERVK-6	CXCL11
ADCYAP1	LCK	CXCL10
PSMG1	MME	CTSD
MAP2K4	NFKBIA	CRP
NR3C1	AKT1	COMT
F10	PPIA	CDKN2A
PTPN1	CCND1	CDKN1A
KCNMA1	APP	CDK4
CHRM5	DPP4	CDK1
OPRD1	TJP1	CDH1
CACNA1S	CR1	CD40LG
PDE4A	CYP2D6	CD4
KDR	IL10RA	CCND1
ESR1	IFNB1	CCNA2
DPEP1	MMP2	CCL2
AKR1B1	KITLG	CAT
MMP3	GFAP	CASP9
EGFR	IL2RB	CASP8
VEGFA	MAPK8	CASP3
CCND1	FASLG	CASP1
BCL2L1	CCR7	BRAF
FOS	CD28	BIRC5
CDKN1A	SRC	BCL2L1
EIF6	CTLA4	BCL2
MMP2	SOD1	BAX
MMP9	CXCR6	BAK1
MAPK1	HCP5	BAD
IL10	CYP3A5	AR
EGF	MCM3AP	APP
RB1	FYN	ALOX5
IL6	BRCA1	AKT1
TP53	POLR2L	AHSA1
ELK1	KDR	AHR
POR	CCL27	ACHE
ODC1	ITGAL
TOP1	HLA-DPB1
RAF1	IL3
SOD1	HSP90AA1
HIF1A	INS
RUNX1T1	IL1RN
HSPA5	CLEC7A
ERBB2	TLR4
ACACA	SST
CAV1	TF
MYC	NOD2
F3	CLEC4M
GJA1	TNFRSF1A
CCL2	FCGR3B
PTGER3	GPR15
CXCL8	EGFR
PRKCB	VIM
BIRC5	AKT2
DUOX2	MAPK10
HSPB1	CYP2C19
SULT1E1	LTF
MGAM	NDUFA2
IL2	BCL2L1
CCNB1	LYN
PLAT	MAPK14
THBD	MTOR
SERPINE1	TAC1
COL1A1	MT-CYB
ALOX5	HLA-E
PTEN	BRCA2
IL1A	MBP
MPO	NR1I2
NCF1	TSG101
ABCA2	APOBEC3H
NFE2L2	CXCR2
NQO1	PAX5
TNKS	PHB
COL8A1	FCGR1A
CXCL11	BMP6
CXCL2	CYP51A1
DCAF5	RAF1
CHEK2	PHB2
CLDN4	ACHE
PPARA	IL12A
PPARD	GJB2
HSF1	SOD2
CRP	LACTB
CXCL10	IGF1
CHUK	MT-ND1
SPP1	CYCS
RUNX2	TRIM5
RASSF1	PTGS2
E2F1	IL6R
E2F2	FADD
ACP3	ERBB2
CTSD	MYO7A
IGFBP3	POMC
IGF2	TLR2
CD40LG	CR2
IRF1	CTSD
ERBB3	KLK3
PCOLCE	OPA1
NPEPPS	CDH23
HK2	PDGFB
NKX3-1	FCER2
RASA1	BDNF
FASN	CDKN1A
FASLG	MAPT
MGST1	SP1
CYP3A43	CXCL1
FYN	HSPA5
IRF3	POLG
TBK1	IGHE
AGT	SERPINA1
STAT3	CTNNBL1
FGFR1	CASP1
FLT1	MUC1
EGR1	AIPL1
RPSA	CDKN2A
PDGFB	HLA-DRA
MAPK3	AKT3
FGF10	APOBEC4
CDK4	CAT
PDGFRB	CD44
CDK6	MMP9
EEF1E1	ITGA4
ELANE	CSF1
MMP14	HSPB1
MAP2K1	CCRL2
IVL	VDR
PLCG1	SELE
RPS6KB1	AFP
LDLR	BAK1
MDM2	TXNRD2
RASGRF2	FGF1
BAK1	APCS
BCL2L10	ITGB7
BBC3	CCR8
MAP3K1	PARP1
BCL2L2	C5AR1
BAD	POLG2
COMT	ITGAM
CAT	TWNK
SAA1	PIK3CG
PRKCE	SMAD3
TEP1	YY1
HTT	HLA-DPA1
TIMP1	CD69
TIMP2	PAX6
TDP1	NOS3
GDPD5	RELA
MMP13	PIK3CA
CDKN1C	FGFR2
IGF1R	CD274
FOSL1	TTR
FOSL2	CYP2C9
FOSB	MPO
JUNB	OTOF
JUND	KRT7
PCNA	GLUL
ARHGAP35	SYP
MMP7	IKBKB
EPHA2	HLA-DMA
EDNRA	HLA-S
EDN1	SERPINE1
VIM	PECAM1
RPS6KA1	SLC17A5
FOXO1	JUN
CD4	IRF3
DHFR	DCK
PIM2	CASP9
FGF2	ESR1
HOXD1	IFNGR1
FAS	LBR
MADD	ITGB1
CYP3A7	CTNNB1
OXSM	NDUFS2
FCER1A	FOS
CEBPA	SELL
TLR4	DYSF
SP1	TRIM22
ME1	COMT
G6PD	TYMS
SREBF2	MAP2K1
SRD5A2	GLS
CREB1	KPNA2
IL6ST	NOS1
CDH1	ITGB2
CYP7A1	GSTP1
MAPK7	APOBEC1
MUC5AC	CIITA
CAMKK2	RAB8B
LGALS8	P4HB
GAPDH	ABCB6
PTGES2	USH1C
CDKN2A	MDM2
ADORA3	PPARG
KDM4C	LIF
FOLH1	ELN
PYGM	APOB
HDAC1	USH2A
GAA	CCR6
CDK1	SLC25A4
PPM1B	PRKACA
PPP1CC	OPRM1
PPP2R5A	RHOA
ADORA1	EZR
PTAFR	HSPD1
ADORA2A	REN
ADORA2B	TNFRSF8
RORC	TG
ATP1A1	F2
SLC5A2	CD80
SLC29A1	ALOX5
HRAS	ACE
CHIA	HIF1A
MAPK14	ANXA5
FGF1	CDK4
HPSE	PCDH15
SLC5A1	GPT
GSK3B	HSPA4
GCGR	EGF
EDNRB	APOBEC3B
BRAF	APOBEC2
SHBG	HIBCH
ABL1	IFNL3
PIK3CD	ABCA4
PRKDC	ITGB3
HCK	IL18R1
SYK	POLR2A
CHEK1	STAR
WEE1	PANK2
HDAC3	NEFL
HDAC6	ABCC1
EIF2AK3	ADIPOQ
CDK2	MIR155
GSTA1	KRT14
GSTA2	PAK1
ADRA2C	RAC1
HTR2C	ABCB11
ADRA2B	PTPRC
DRD2	IRF4
HTR1B	PROM1
HRH1	APOL1
HTR1A	PEX11B
ESR2	TNFRSF1B
PIM1	CX3CL1
CCNA2	MT-CO1
APP	ABCB7
MMP8	ALK
DRD5	HP
	TLR9
	BAD
	USH1G
	UGT1A1
	PCNA
	RBP4
	GPX1
	CDK1
	SPTLC2
	IDH3A
	IDH3B
	NNT
	ADAR
	TCL1A
	EIF2AK2
	MMP1
	DNASE1
	RAI1
	CEP290
	CCL7
	GAA
	BCL2A1
	IMPDH1
	GRIN1
	RHO
	TNFRSF11B
	EDN1
	H2AX
	PRKAR1A
	PLAUR
	SMARCB1
	CCK
	ACKR1
	RNASET2
	NDUFA5
	TFB1M
	CXCR3
	FGFR3
	KHDRBS1
	CD86
	LRAT
	CIB2
	AHR
	GRIN2A
	TULP1
	PDCD1
	DES
	ELANE
	SNCA
	PTGS1
	HLA-F
	MMP7
	IGHM
	AR
	RPS27A
	TFAP2A
	LDLR
	PRTN3
	ATM
	HLA-DRB4
	SLC6A3
	BLVRB
	GSR
	CYP11B2
	PPIG
	PLAU
	NAGLU
	SFTPD
	MT-ND2
	DYRK1A
	POLR1H
	SPP1
	RNF39
	HRAS
	IFNAR1
	HLA-DRB5
	HLA-DRB3
	NKX2-1
	NEU1
	DUT
	KIT
	IL6ST
	OXA1L
	SDHB
	RPGRIP1
	BBS1
	HSPA9
	HTN3
	MICB
	MUC7
	PRKCA
	MKI67
	EIF5A
	CYP2A6
	PRL
	DRD2
	TXN
	COX5A
	NR2E3
	VSX2
	MT-ATP6
	WHRN
	BRAF
	IL7R
	VIP
	MAP2
	CYP11B1
	FASN
	NGF
	PDZD7
	GTPBP3
	CRB1
	NAT2
	CST3
	TIMM8A
	PTEN
	RPE65
	INSR
	ADGRV1
	CFP
	NMT2
	ITGAV
	LDHA
	TNFSF10
	MT-CO3
	RAB32
	TOMM34
	MRPL18
	BID
	FBXW11
	DGUOK
	AMACR
	SDCCAG8
	CYP24A1
	KRT19
	CNGB3
	HSPA8
	SLC26A4
	SMARCA4
	GH1
	CD14
	MIR21
	MPP1
	CALCA
	MS4A1
	GDF6
	FECH
	XPO1
	GPX4
	APAF1
	TIMP1
	COX4I1
	SLC6A4
	EDNRB
	IGSF6
	ALPP
	GRIN2B
	UGT2B7
	NR3C2
	PIK3C3
	RDH12
	CRX
	LCA5
	PRPH2
	CALB2
	CD8A
	CFB
	GLS2
	TSPO
	SLC1A2
	FCGR2A
	PRDX5
	MIF
	FTH1
	PIK3C2A
	DSPP
	MT-ND4
	SOX2
	POLR2F
	CCNA2
	CDH1
	TOP2A
	NME1
	MAPK9
	LRP1
	RP2
	LEP
	CD27
	HTR2A
	MT-TS2
	BIRC5
	IFNA5
	IFNA6
	IFNA21
	IFNA10
	IFNA13
	IFNA4
	IFNA8
	IFNA17
	IFNA7
	IFNA14
	IFNA16
	FCGR3A
	IQCB1
	CEP250
	RS1
	APOA1
	GUCY2D
	CLEC6A
	VDAC1
	FXN
	PAX3
	SLC25A19
	ENO2
	KRT20
	ABO
	CS
	KRT17
	RLBP1
	RNASEL
	DLAT
	HK1
	FGF3
	SPATA7
	HMGCR
	NPPB
	MFN2
	PRMT6
	HLA-DQA1
	CCNT2
	HIVEP2
	SPG7
	F9
	TNFSF13B
	PLAT
	MTR
	PINK1
	CD3D
	LDHB
	PTK2B
	PRPF31
	PRKCD
	OTX2
	MT-ND6
	CALB1
	ATL1
	BCHE
	GRIN2D
	CD34
	RBL2
	ARSG
	ESPN
	CDH23-AS1
	USH2A-AS1
	USH2A-AS2
	MYH9
	CYP19A1
	MDH2
	UCP2
	RXRG
	GGT1
	AGXT
	IDE
	FLT1
	ASPM
	NT5C
	TNFSF11
	TGFA
	PTK2
	POMGNT1
	GZMB
	CHAT
	EEF1A1
	APEX1
	IDH1
	DGKI
	PARD3B
	CYP27B1
	TGFB2
	JAK2
	PRPF8
	CD59
	HSD3B1
	CBS
	IL18BP
	CD163
	RPA1
	PRKDC
	ALDH7A1
	IFNL4
	NCAM1
	HLA-DOA
	KARS1
	GRIN2C
	TP63
	POU5F1
	LBP
	PGK1
	COL2A1
	SIX6
	RAX
	YWHAQ
	RB1
	BEST1
	LDHD
	LTB
	HSPA1A
	IKBKG
	HADHA
	PDGFRB
	APOBEC3A
	CCR9
	MT-ND5
	OGDH
	PIK3R1
	CD151
	PCK2
	PDK4
	MRPL28
	SUCLA2
	SOX10
	PEX6
	PNP
	UCHL1
	NME2
	CXCR5
	MECP2
	GNAQ
	COL11A1
	KRAS
	MITF
	KRT5
	FGFR1
	CYBB
	CLRN1
	IL8RA
	GPR13
	SDF1
	IFG
	IL4RA
	SCYA3L1
	NKAT3
	V28
	IFI
	LD78
	NKB1
	IMD69
	AMB11
	KIR3DS1
	LIG3
	LIG1
	DNMT3L
	BLMH
	POLA1
	SLC22A6
	TYMP
	ORM1
	rplA
	SLC16A1
	TK1
	SLC22A1
	SLC22A8
	SLC22A7
	SLC47A1
	SLC47A2
	IFNAR2
	CYP1A2
	PGR
	TUBB1
	CYP2C8
	CYP3A7
	ABCC10
	CYP1B1
	SLCO1B3
	MAP4
	ABCC2
	CRBN
	SLC15A1
	SLC15A2
	SLC6A14
	TUBB
	ABCC3
	SLC22A3
	ABCG2
	TUBA4A
	RALBP1
	SLCO1B1
	HCG18
	ERVK-32
	PSORS1C1
	HCG17
	SNHG32
	GABBR1
	TNXB
	ERVK-20
	ERVK-18
	OR12D3
	DDR1
	ZNRD1
	LINC02571
	OR5V1
	NRSN1
	CHP1
	H3P19
	TPPP
	TMED2
	PDLIM7
	GPAT3
	TRBV20OR9-2
	ARC
	F3
	GC
	BMP1
	LOC107987479
	CCL18
	CXCL11
	H3P40
	H3P9
	GORASP1
	SUB1
	TAP2
	WNK1
	SYT1
	PTN
	INTS2
	MIR146B
	PSMD8
	IL21
	CRK
	ERVK-8
	PRNP
	SLK
	SPAG9
	ARHGEF7
	SOCS1
	ERVK-10
	ACCS
	JAM3
	MICA
	NAF1
	CD24
	ENTPD4
	ENTPD1
	GRAP2
	LAS1L
	ERVK-9
	ERVK-21
	ERVK-19
	AHSA1
	TIA1
	THBS1
	TGM2
	PRDX2
	C3
	C4BPA
	CDKN2B
	ERVK-25
	AIMP2
	CARD14
	ERVK-24
	ACTR2
	TRG
	INSRR
	FGF5
	ZHX2
	ANGPTL2
	CA14
	MSTN
	IL17A
	PLA2G15
	FUT1
	POLDIP2
	NXT1
	IGHV3-75
	CLEC9A
	GPI
	LAMP3
	NCR3
	RNF19A
	ACSS2
	RTEL1
	TLR7
	ASCC1
	MIR375
	ATP6V1E1
	PIN1
	USE1
	PRCP
	CASC1
	PGPEP1
	DNAJB12
	PML
	PLK1
	YBX1
	MIR150
	CYP4F3
	LSAMP
	LGALS1
	C6orf120
	TBATA
	MYD88
	DUSP5
	CYTB
	ERVK-7
	MST1R

## Sheet: Supplementary Material 5
Supplementary Material 5
The exported information of PPI network diagram of intersection targets for JAKCP and AIDS by String
SUID	AverageShortestPathLength	BetweennessCentrality	ClosenessCentrality	ClusteringCoefficient	Degree	Eccentricity	IsSingleNode	name	NeighborhoodConnectivity	NumberOfDirectedEdges	NumberOfUndirectedEdges	PartnerOfMultiEdgedNodePairs	Radiality	selected	SelfLoops	shared name	Stress	TopologicalCoefficient
72	3.52713	0	0.283516	0	1	5	FALSE	PLAT	8	1	0	0	0.578811	FALSE	0	PLAT	0	0
73	2.9845	0	0.335065	1	3	6	FALSE	SELE	16	3	0	0	0.669251	FALSE	0	SELE	0	0.5
74	2.62791	0.00189926	0.380531	0.238095	7	5	FALSE	IRF3	16.7143	7	0	0	0.728682	FALSE	0	IRF3	254	0.301299
75	2.84496	0	0.351499	0	1	4	FALSE	HSPA5	33	1	0	0	0.692506	FALSE	0	HSPA5	0	0
76	2.5814	1.346e-05	0.387387	0.833333	4	5	FALSE	IL6ST	27.75	4	0	0	0.736434	FALSE	0	IL6ST	2	0.4625
77	3.76744	0	0.265432	0	1	6	FALSE	GAA	4	1	0	0	0.53876	FALSE	0	GAA	0	0
78	2.41085	0.00128593	0.414791	0.464286	8	5	FALSE	PPARG	24.875	8	0	0	0.764858	FALSE	0	PPARG	254	0.33
79	2.51163	2.728e-05	0.398148	0.9	5	4	FALSE	FLT1	23.2	5	0	0	0.748062	FALSE	0	FLT1	6	0.3625
80	2.33333	0.00159828	0.428571	0.488889	10	4	FALSE	KDR	21.9	10	0	0	0.777778	FALSE	0	KDR	216	0.27375
81	2.65891	0	0.376093	1	4	4	FALSE	FGFR1	23.5	4	0	0	0.723514	FALSE	0	FGFR1	0	0.47
82	2.50388	0.0004331	0.399381	0.733333	6	4	FALSE	FGF1	28.3333	6	0	0	0.749354	FALSE	0	FGF1	76	0.435897
83	3.10853	0	0.321696	0	1	5	FALSE	FASN	19	1	0	0	0.648579	FALSE	0	FASN	0	0
84	2.53488	0.00224743	0.394495	0.6	6	5	FALSE	MMP1	16.1667	6	0	0	0.744186	FALSE	0	MMP1	262	0.269444
85	2.68217	0.0125984	0.372832	0.333333	3	5	FALSE	MPO	16	3	0	0	0.719638	FALSE	0	MPO	750	0.348148
86	2.77519	0.0156687	0.360335	0.166667	4	5	FALSE	PLAU	12.75	4	0	0	0.704134	FALSE	0	PLAU	1176	0.360294
87	2.06202	0.00369401	0.484962	0.485294	17	4	FALSE	ERBB2	26.4706	17	0	0	0.822997	FALSE	0	ERBB2	804	0.249723
88	2.35659	0.00420865	0.424342	0.5	8	4	FALSE	MMP2	21.375	8	0	0	0.773902	FALSE	0	MMP2	456	0.27057
89	1.66667	0	0.6	0	1	2	FALSE	NR1I2	3	1	0	0	0.666667	FALSE	0	NR1I2	0	0
90	1.33333	0	0.75	1	2	2	FALSE	CYP3A7	2.5	2	0	0	0.833333	FALSE	0	CYP3A7	0	0.833333
91	1	0.666667	1	0.333333	3	1	FALSE	CYP3A4	1.66667	3	0	0	1	FALSE	0	CYP3A4	4	0.666667
92	1.33333	0	0.75	1	2	2	FALSE	CYP1A2	2.5	2	0	0	0.833333	FALSE	0	CYP1A2	0	0.833333
93	2.22481	0.00290424	0.449477	0.512821	13	4	FALSE	HCK	25.6923	13	0	0	0.795866	FALSE	0	HCK	496	0.282333
94	2.12403	0.00936007	0.470803	0.356725	19	5	FALSE	STAT1	22.8947	19	0	0	0.812662	FALSE	0	STAT1	1392	0.23362
95	2.23256	0.00624835	0.447917	0.454545	12	4	FALSE	IFNG	24.0833	12	0	0	0.794574	FALSE	0	IFNG	936	0.261775
96	2.63566	0.0096644	0.379412	0.2	6	5	FALSE	ELANE	10.3333	6	0	0	0.72739	FALSE	0	ELANE	790	0.210884
97	3.48062	0	0.287305	1	2	6	FALSE	SLPI	5.5	2	0	0	0.586563	FALSE	0	SLPI	0	0.611111
98	2.65891	0.0088876	0.376093	0.2	5	5	FALSE	CTSD	12.8	5	0	0	0.723514	FALSE	0	CTSD	846	0.273913
99	2.94574	0	0.339474	1	2	5	FALSE	CRP	25	2	0	0	0.675711	FALSE	0	CRP	0	0.735294
100	3.44961	0.0112134	0.289888	0	2	5	FALSE	SLC6A4	3.5	2	0	0	0.591731	FALSE	0	SLC6A4	824	0.5
101	4.32558	0.00046879	0.231183	0	2	6	FALSE	COMT	2	2	0	0	0.445736	FALSE	0	COMT	16	0.5
102	2.11628	0.0236144	0.472527	0.467836	19	4	FALSE	SP1	24.4737	19	0	0	0.813953	FALSE	0	SP1	2602	0.249194
103	2.26357	0.0131917	0.441781	0.32967	14	4	FALSE	MMP9	18.7143	14	0	0	0.789406	FALSE	0	MMP9	1392	0.221939
104	3.08527	0.00027471	0.324121	0	2	5	FALSE	SLC6A3	8.5	2	0	0	0.652455	FALSE	0	SLC6A3	30	0.5
105	2.82946	0.00155017	0.353425	0.333333	6	5	FALSE	MMP7	8.33333	6	0	0	0.69509	FALSE	0	MMP7	98	0.281609
106	2.24806	0.0019163	0.444828	0.551282	13	4	FALSE	NFKBIA	25.2308	13	0	0	0.79199	FALSE	0	NFKBIA	328	0.283492
107	2.8062	0	0.356354	1	3	5	FALSE	LDLR	18.3333	3	0	0	0.698966	FALSE	0	LDLR	0	0.555556
108	2.55039	0.00055741	0.392097	0.8	5	4	FALSE	CD4	24	5	0	0	0.741602	FALSE	0	CD4	76	0.4
109	2.37984	0.0014969	0.420195	0.527273	11	4	FALSE	CDKN2A	21.8182	11	0	0	0.770026	FALSE	0	CDKN2A	278	0.287081
110	1.92248	0.0392393	0.520161	0.361823	27	4	FALSE	EGFR	22.2593	27	0	0	0.846253	FALSE	0	EGFR	4094	0.196985
111	2.64341	0.00046075	0.378299	0.75	8	5	FALSE	PCNA	18.75	8	0	0	0.726098	FALSE	0	PCNA	72	0.360577
112	2.58915	0.00096876	0.386228	0.638889	9	4	FALSE	CDK4	16.6667	9	0	0	0.735142	FALSE	0	CDK4	168	0.30303
113	2.41085	0.0015378	0.414791	0.551282	13	5	FALSE	IL10	18.9231	13	0	0	0.764858	FALSE	0	IL10	244	0.27033
114	2.06202	0.00505145	0.484962	0.542105	20	5	FALSE	FOS	26.1	20	0	0	0.822997	FALSE	0	FOS	1096	0.248571
115	2.51938	0.00195042	0.396923	0.52381	7	5	FALSE	VCAM1	19	7	0	0	0.74677	FALSE	0	VCAM1	358	0.296875
116	2.44961	0.00296985	0.408228	0.6	10	5	FALSE	ICAM1	19.3	10	0	0	0.758398	FALSE	0	ICAM1	484	0.27971
117	2.34109	0.00150091	0.427152	0.602564	13	5	FALSE	CCL2	23.4615	13	0	0	0.776486	FALSE	0	CCL2	268	0.296982
118	2.34884	0.00120809	0.425743	0.4	6	4	FALSE	FASLG	22.1667	6	0	0	0.775194	FALSE	0	FASLG	194	0.263889
119	2.02326	0.0332989	0.494253	0.305376	31	5	FALSE	TNF	17.871	31	0	0	0.829457	FALSE	0	TNF	4046	0.17871
120	2.4186	0.0007557	0.413462	0.533333	6	4	FALSE	FAS	20.8333	6	0	0	0.763566	FALSE	0	FAS	128	0.274123
121	2.50388	0.00209995	0.399381	0.511111	10	5	FALSE	TLR4	18.7	10	0	0	0.749354	FALSE	0	TLR4	308	0.279104
122	2.1938	0.00711976	0.45583	0.417582	14	4	FALSE	FGF2	23.4286	14	0	0	0.801034	FALSE	0	FGF2	878	0.256672
123	2.13178	0.00787103	0.469091	0.45614	19	4	FALSE	IL1B	21.2632	19	0	0	0.81137	FALSE	0	IL1B	1266	0.219208
124	2.4186	0.00077885	0.413462	0.666667	9	5	FALSE	IL1A	26.1111	9	0	0	0.763566	FALSE	0	IL1A	134	0.348148
125	2.46512	0.00172941	0.40566	0.333333	7	5	FALSE	CASP1	18.1429	7	0	0	0.755814	FALSE	0	CASP1	228	0.26087
126	2.15504	0.0058839	0.464029	0.447619	15	4	FALSE	MAP2K1	25.6667	15	0	0	0.807494	FALSE	0	MAP2K1	964	0.263918
127	2.27132	0.00347218	0.440273	0.484848	12	4	FALSE	PRKCA	22.75	12	0	0	0.788114	FALSE	0	PRKCA	444	0.267647
128	2.55039	0.00027674	0.392097	0.666667	7	5	FALSE	BRAF	23.2857	7	0	0	0.741602	FALSE	0	BRAF	42	0.399015
129	2.45736	0.0101829	0.40694	0.410256	13	4	FALSE	CDK1	15.6154	13	0	0	0.757106	FALSE	0	CDK1	1274	0.239053
130	3.23256	0	0.309353	1	3	5	FALSE	TOP2A	9	3	0	0	0.627907	FALSE	0	TOP2A	0	0.642857
131	2.68217	0.00273979	0.372832	0.611111	9	5	FALSE	CCNA2	14.3333	9	0	0	0.719638	FALSE	0	CCNA2	484	0.304965
132	2.45736	0.00695568	0.40694	0.6	5	5	FALSE	BIRC5	23.4	5	0	0	0.757106	FALSE	0	BIRC5	726	0.316216
133	2.62791	0.000103	0.380531	0.9	5	5	FALSE	BAX	20.2	5	0	0	0.728682	FALSE	0	BAX	26	0.374074
134	2.72868	0	0.366477	1	4	5	FALSE	BAK1	18.75	4	0	0	0.711886	FALSE	0	BAK1	0	0.407609
135	2.72093	0	0.367521	1	4	4	FALSE	NR3C2	19.25	4	0	0	0.713178	FALSE	0	NR3C2	0	0.4375
136	2.33333	0.00159942	0.428571	0.577778	10	4	FALSE	PGR	24.7	10	0	0	0.777778	FALSE	0	PGR	304	0.30875
137	2.26357	0.0054823	0.441781	0.241758	14	4	FALSE	PRKACA	17.2143	14	0	0	0.789406	FALSE	0	PRKACA	710	0.201681
138	2.07752	0.0100695	0.481343	0.444444	19	4	FALSE	NR3C1	25.1579	19	0	0	0.820413	FALSE	0	NR3C1	1568	0.244251
139	1.96899	0.0153165	0.507874	0.358974	27	4	FALSE	MAPK8	23	27	0	0	0.838501	FALSE	0	MAPK8	2490	0.211009
140	2.14729	0.0144247	0.465704	0.248366	18	4	FALSE	CASP8	18.2778	18	0	0	0.808786	FALSE	0	CASP8	1752	0.192398
141	2.03101	0.0320462	0.492366	0.310345	29	4	FALSE	IL6	19.3103	29	0	0	0.828165	FALSE	0	IL6	4552	0.197044
142	1.94574	0.0291243	0.513944	0.289773	33	4	FALSE	RELA	19.6667	33	0	0	0.842377	FALSE	0	RELA	4218	0.185535
143	2.17054	0.0210513	0.460714	0.366667	21	4	FALSE	CXCL8	18.4286	21	0	0	0.80491	FALSE	0	CXCL8	2778	0.207063
144	2.81395	0.00278615	0.355372	0.666667	6	5	FALSE	DRD2	11.1667	6	0	0	0.697674	FALSE	0	DRD2	186	0.289474
145	2.49612	0.0261117	0.400621	0.6	5	4	FALSE	HTR2A	18.6	5	0	0	0.750646	FALSE	0	HTR2A	1786	0.283077
146	2.45736	0.00272247	0.40694	0.466667	10	4	FALSE	CXCL10	16.8	10	0	0	0.757106	FALSE	0	CXCL10	408	0.254545
147	2.64341	0.00120047	0.378299	0.5	5	5	FALSE	SPP1	17.8	5	0	0	0.726098	FALSE	0	SPP1	118	0.32
148	2.45736	0.00037927	0.40694	0.7	5	4	FALSE	EDNRB	24	5	0	0	0.757106	FALSE	0	EDNRB	60	0.338028
149	2.50388	0.00114531	0.399381	0.8	6	4	FALSE	OPRM1	19.1667	6	0	0	0.749354	FALSE	0	OPRM1	230	0.299479
150	2.75194	0.00028345	0.36338	0.733333	6	4	FALSE	CXCL11	12.8333	6	0	0	0.70801	FALSE	0	CXCL11	32	0.320833
151	2.53488	0.0183848	0.394495	0.535714	8	4	FALSE	SERPINE1	15.625	8	0	0	0.744186	FALSE	0	SERPINE1	1746	0.274554
152	2.17829	0.00603846	0.459075	0.472527	14	4	FALSE	TGFB1	25	14	0	0	0.803618	FALSE	0	TGFB1	948	0.265957
153	2.31008	0.00499398	0.432886	0.474359	13	4	FALSE	TIMP1	18.4615	13	0	0	0.781654	FALSE	0	TIMP1	616	0.230769
154	2.04651	0.0409506	0.488636	0.268398	22	4	FALSE	APP	19.0455	22	0	0	0.825581	FALSE	0	APP	4282	0.184907
155	2.27132	0.0187027	0.440273	0.5	9	5	FALSE	PTGS2	25.8889	9	0	0	0.788114	FALSE	0	PTGS2	1698	0.28642
156	3.5969	0.00050016	0.278017	0	2	6	FALSE	PTGS1	2.5	2	0	0	0.567183	FALSE	0	PTGS1	32	0.5
157	3.21705	0.00316342	0.310843	0	2	6	FALSE	ALOX5	5.5	2	0	0	0.630491	FALSE	0	ALOX5	244	0.5
158	2.03101	0.00877848	0.492366	0.480519	22	4	FALSE	MYC	26.3182	22	0	0	0.828165	FALSE	0	MYC	1596	0.245964
159	1.86822	0.0362723	0.53527	0.317734	29	4	FALSE	VEGFA	21.3793	29	0	0	0.855297	FALSE	0	VEGFA	4610	0.181181
160	2.43411	0.00020494	0.410828	0.5	4	5	FALSE	VIM	31.75	4	0	0	0.760982	FALSE	0	VIM	52	0.407051
161	2.02326	0.00454948	0.494253	0.516667	16	4	FALSE	HIF1A	27.6875	16	0	0	0.829457	FALSE	0	HIF1A	912	0.249437
162	2.4031	0.00245967	0.416129	0.361111	9	5	FALSE	IKBKB	19.2222	9	0	0	0.76615	FALSE	0	IKBKB	324	0.251462
163	1.94574	0.0206438	0.513944	0.34023	30	4	FALSE	HRAS	20.6667	30	0	0	0.842377	FALSE	0	HRAS	2802	0.193146
164	2.00775	0.0189353	0.498069	0.403162	23	4	FALSE	ESR1	23.5217	23	0	0	0.832041	FALSE	0	ESR1	2254	0.219829
165	2.11628	0.0084867	0.472527	0.48366	18	4	FALSE	CDKN1A	22.1111	18	0	0	0.813953	FALSE	0	CDKN1A	1600	0.218922
166	2.18605	0.00509735	0.457447	0.538462	14	5	FALSE	BCL2	24.4286	14	0	0	0.802326	FALSE	0	BCL2	794	0.251841
167	2.42636	0.00069508	0.412141	0.583333	9	5	FALSE	BAD	24.4444	9	0	0	0.762274	FALSE	0	BAD	126	0.339506
168	2.06977	0.0154378	0.483146	0.336842	20	4	FALSE	EDN1	22.8	20	0	0	0.821705	FALSE	0	EDN1	1744	0.223529
169	2.20155	0.00492933	0.454225	0.390476	15	4	FALSE	AR	24.1333	15	0	0	0.799742	FALSE	0	AR	758	0.259498
170	2.21705	0.00199876	0.451049	0.545455	12	4	FALSE	PTEN	24.75	12	0	0	0.797158	FALSE	0	PTEN	368	0.266129
171	1.90698	0.0230721	0.52439	0.36553	33	4	FALSE	JUN	22.3939	33	0	0	0.848837	FALSE	0	JUN	4028	0.201747
172	2.30233	0.00088796	0.434343	0.535714	8	4	FALSE	CD40LG	28.625	8	0	0	0.782946	FALSE	0	CD40LG	148	0.321629
173	2.48837	0.00057908	0.401869	0.533333	6	5	FALSE	RXRG	26	6	0	0	0.751938	FALSE	0	RXRG	102	0.385572
174	2.35659	0.00044307	0.424342	0.678571	8	4	FALSE	PIK3CG	24.75	8	0	0	0.773902	FALSE	0	PIK3CG	60	0.309375
175	2	0.00960103	0.5	0.434783	23	4	FALSE	FYN	23.4783	23	0	0	0.833333	FALSE	0	FYN	1388	0.219423
176	2.10078	0.0128155	0.476015	0.409357	19	4	FALSE	PDGFB	20.3684	19	0	0	0.816537	FALSE	0	PDGFB	1678	0.201668
177	2.62016	5.004e-05	0.381657	0.833333	4	5	FALSE	CASP9	22.75	4	0	0	0.729974	FALSE	0	CASP9	14	0.399123
178	2.27132	0.00419831	0.440273	0.533333	10	5	FALSE	NOS2	25.7	10	0	0	0.788114	FALSE	0	NOS2	476	0.285556
179	2.52713	0.00107719	0.395706	0.6	5	5	FALSE	PRKDC	23.8	5	0	0	0.745478	FALSE	0	PRKDC	138	0.357576
180	2.30233	0.00647666	0.434343	0.333333	15	5	FALSE	CASP3	17.5333	15	0	0	0.782946	FALSE	0	CASP3	872	0.211245
181	2.51163	0	0.398148	1	3	4	FALSE	INSR	39.3333	3	0	0	0.748062	FALSE	0	INSR	0	0.561905
182	2.1938	0.00664213	0.45583	0.483516	14	5	FALSE	BCL2L1	23.1429	14	0	0	0.801034	FALSE	0	BCL2L1	1000	0.241071
183	2.26357	0.00087059	0.441781	0.555556	9	4	FALSE	NOS3	24.6667	9	0	0	0.789406	FALSE	0	NOS3	136	0.277154
184	2.75969	0	0.36236	1	2	5	FALSE	SOD1	23.5	2	0	0	0.706718	FALSE	0	SOD1	0	0.534091
185	1.7907	0.0831482	0.558442	0.264808	42	4	FALSE	TP53	19.2619	42	0	0	0.868217	FALSE	0	TP53	9498	0.167495
186	2.13178	0.0112515	0.469091	0.4	20	4	FALSE	RB1	21.25	20	0	0	0.81137	FALSE	0	RB1	2046	0.221354
187	2	0.019254	0.5	0.395257	23	4	FALSE	EGF	21.087	23	0	0	0.833333	FALSE	0	EGF	2314	0.193458
188	1.68992	0.125872	0.591743	0.222041	50	4	FALSE	STAT3	18.88	50	0	0	0.885013	FALSE	0	STAT3	13276	0.157333
189	1.75969	0.0971584	0.568282	0.198732	44	4	FALSE	PIK3CA	17.25	44	0	0	0.873385	FALSE	0	PIK3CA	9288	0.147436
190	1.7907	0.0335317	0.558442	0.311522	38	4	FALSE	MAPK3	21.3947	38	0	0	0.868217	FALSE	0	MAPK3	5712	0.179788
191	2.16279	0.00898122	0.462366	0.580952	15	4	FALSE	PDGFRB	23.9333	15	0	0	0.806202	FALSE	0	PDGFRB	932	0.246735
192	2.22481	0.020034	0.449477	0.309091	11	4	FALSE	CDH1	25.0909	11	0	0	0.795866	FALSE	0	CDH1	1964	0.271739
193	2.48837	0.00181854	0.401869	0.545455	11	5	FALSE	MDM2	18.6364	11	0	0	0.751938	FALSE	0	MDM2	274	0.278155
194	2.18605	0.00240449	0.457447	0.538462	14	4	FALSE	RAF1	26.2857	14	0	0	0.802326	FALSE	0	RAF1	466	0.276692
195	2.42636	0.00074874	0.412141	0.533333	6	5	FALSE	HSPB1	25	6	0	0	0.762274	FALSE	0	HSPB1	84	0.333333
196	2.68992	0.00017062	0.371758	0.666667	3	5	FALSE	CAT	18.6667	3	0	0	0.718346	FALSE	0	CAT	18	0.380952
197	1.97674	0.02046	0.505882	0.32266	29	4	FALSE	MAPK14	22.1379	29	0	0	0.837209	FALSE	0	MAPK14	3002	0.204981
198	2.14729	0.00613861	0.465704	0.466667	16	5	FALSE	CCND1	24.25	16	0	0	0.808786	FALSE	0	CCND1	1228	0.2425
199	2.03101	0.00506659	0.492366	0.54386	19	4	FALSE	IL2	29.5789	19	0	0	0.828165	FALSE	0	IL2	1082	0.271366
200	1.75969	0.0791654	0.568282	0.273077	40	4	FALSE	MAPK1	20.35	40	0	0	0.873385	FALSE	0	MAPK1	8678	0.168182
201	1.77519	0.0949614	0.563319	0.218816	44	4	FALSE	AKT1	18.0455	44	0	0	0.870801	FALSE	0	AKT1	9040	0.158094
202	2.84496	0	0.351499	0	1	4	FALSE	AHSA1	33	1	0	0	0.692506	FALSE	0	AHSA1	0	0
203	1.85271	0.0942754	0.539749	0.270833	33	3	FALSE	HSP90AA1	19.8788	33	0	0	0.857881	FALSE	0	HSP90AA1	8244	0.176677
204	3.75969	0.004517	0.265979	0	2	5	FALSE	CYP1B1	2	2	0	0	0.540052	FALSE	0	CYP1B1	348	0.5
205	2.8062	0.0193098	0.356354	0	2	4	FALSE	AHR	17.5	2	0	0	0.698966	FALSE	0	AHR	1316	0.5

## Sheet: Supplementary Material 6
Supplementary Material 6
The exported information of the intersection targets network of PPI of AIDS and PPI of JAKCP by BisoGenet
SUID	annotation.Taxon	AverageShortestPathLength	Betweenness	BetweennessCentrality	bg.annotation.DbId	bg.annotation.DbRelease	bg.annotation.Description	bg.annotation.EntityType	bg.annotation.GO	bg.annotation.ID	bg.annotation.InputName	bg.annotation.IsSeed	bg.annotation.KEGG	bg.annotation.Name	bg.annotation.SourceOrganism	bg.annotation.XNames	Closeness	ClosenessCentrality	ClusteringCoefficient	Degree	Eccentricity	Eigenvector	IsSingleNode	LAC	Matching.Attribute	name	NeighborhoodConnectivity	Network	NumberOfDirectedEdges	NumberOfUndirectedEdges	PartnerOfMultiEdgedNodePairs	Radiality	selected	SelfLoops	shared name	Stress	Subgragh	TopologicalCoefficient
596645	taxon:9606	2.95115		1.366e-05	180226	1902	integrin subunit alpha M	gene	biological_process-&-1&-GO:0010668-&&-ectodermal cell differentiation-%%-GO:0050900-&&-leukocyte migration-%%-GO:0030198-&&-extracellular matrix organization-%%-GO:0043312-&&-neutrophil degranulation-%%-GO:0007155-&&-cell adhesion-%%-GO:0007229-&&-integrin-mediated signaling pathway-%%-GO:0034142-&&-toll-like receptor 4 signaling pathway|cellular_component-&-1&-GO:0035579-&&-specific granule memb…	G:9606:ITGAM	ITGAM	TRUE	KEGG-&-1&-hsa05202-&&-Transcriptional misregulation in cancer-%%-hsa04514-&&-Cell adhesion molecules (CAMs)-%%-hsa05150-&&-Staphylococcus aureus infection-%%-hsa05133-&&-Pertussis-%%-hsa04610-&&-Complement and coagulation cascades-%%-hsa05146-&&-Amoebiasis-%%-hsa04810-&&-Regulation of actin cytoskeleton-%%-hsa05134-&&-Legionellosis-%%-hsa05152-&&-Tuberculosis-%%-hsa04145-&&-Phagosome-%%-hsa04670-…	ITGAM	Homo sapiens (Human)-&&-9606	Gene Symbol-&-1&-ITGAM		0.338851	0.0761905	15	4		FALSE		ITGAM	ITGAM	58		0	15	0	0.674808	FALSE	0	ITGAM	16236		0.079889
596646	taxon:9606	2.94667		3.6e-06	180227	1902	integrin subunit alpha L	gene	biological_process-&-1&-GO:0007157-&&-heterophilic cell-cell adhesion via plasma membrane cell adhesion molecules-%%-GO:0043113-&&-receptor clustering-%%-GO:0007155-&&-cell adhesion-%%-GO:0006954-&&-inflammatory response-%%-GO:0050900-&&-leukocyte migration-%%-GO:0007160-&&-cell-matrix adhesion-%%-GO:0030198-&&-extracellular matrix organization-%%-GO:0006928-&&-movement of cell or subcellular com…	G:9606:ITGAL	ITGAL	TRUE	KEGG-&-1&-hsa05416-&&-Viral myocarditis-%%-hsa05144-&&-Malaria-%%-hsa04514-&&-Cell adhesion molecules (CAMs)-%%-hsa04670-&&-Leukocyte transendothelial migration-%%-hsa05150-&&-Staphylococcus aureus infection-%%-hsa04015-&&-Rap1 signaling pathway-%%-hsa05169-&&-Epstein-Barr virus infection-%%-hsa05323-&&-Rheumatoid arthritis-%%-hsa04650-&&-Natural killer cell mediated cytotoxicity-%%-hsa04810-&&-R…	ITGAL	Homo sapiens (Human)-&&-9606	Gene Symbol-&-1&-ITGAL		0.339367	0.138889	11	4		FALSE		ITGAL	ITGAL	95.8889		0	10	0	0.675556	FALSE	1	ITGAL	6076		0.127238
596647	taxon:9606	2.56115		0.00020594	180225	1902	integrin subunit alpha V	gene	biological_process-&-1&-GO:0007204-&&-positive regulation of cytosolic calcium ion concentration-%%-GO:0030335-&&-positive regulation of cell migration-%%-GO:0010745-&&-negative regulation of macrophage derived foam cell differentiation-%%-GO:0030198-&&-extracellular matrix organization-%%-GO:2000425-&&-regulation of apoptotic cell clearance-%%-GO:0010888-&&-negative regulation of lipid storage-%…	G:9606:ITGAV		FALSE	KEGG-&-1&-hsa05222-&&-Small cell lung cancer-%%-hsa04514-&&-Cell adhesion molecules (CAMs)-%%-hsa05418-&&-Fluid shear stress and atherosclerosis-%%-hsa05163-&&-Human cytomegalovirus infection-%%-hsa04510-&&-Focal adhesion-%%-hsa05205-&&-Proteoglycans in cancer-%%-hsa04810-&&-Regulation of actin cytoskeleton-%%-hsa05165-&&-Human papillomavirus infection-%%-hsa05200-&&-Pathways in cancer-%%-hsa0415…	ITGAV	Homo sapiens (Human)-&&-9606	Gene Symbol-&-1&-ITGAV		0.390449	0.0904255	48	4		FALSE		ITGAV	ITGAV	139.958		0	48	0	0.739808	FALSE	0	ITGAV	333554		0.0412975
596648	taxon:9606	3.11936		2.63e-06	180230	1902	integrin subunit alpha 9	gene	biological_process-&-1&-GO:0030198-&&-extracellular matrix organization-%%-GO:0030593-&&-neutrophil chemotaxis-%%-GO:0042060-&&-wound healing-%%-GO:0007155-&&-cell adhesion-%%-GO:0007229-&&-integrin-mediated signaling pathway|cellular_component-&-1&-GO:0005886-&&-plasma membrane-%%-GO:0034679-&&-integrin alpha9-beta1 complex-%%-GO:0008305-&&-integrin complex-%%-GO:0009925-&&-basal plasma membrane…	G:9606:ITGA9		FALSE	KEGG-&-1&-hsa05410-&&-Hypertrophic cardiomyopathy (HCM)-%%-hsa04514-&&-Cell adhesion molecules (CAMs)-%%-hsa05414-&&-Dilated cardiomyopathy (DCM)-%%-hsa04510-&&-Focal adhesion-%%-hsa05412-&&-Arrhythmogenic right ventricular cardiomyopathy (ARVC)-%%-hsa04810-&&-Regulation of actin cytoskeleton-%%-hsa05165-&&-Human papillomavirus infection-%%-hsa04151-&&-PI3K-Akt signaling pathway-%%-hsa04512-&&-EC…	ITGA9	Homo sapiens (Human)-&&-9606	Gene Symbol-&-1&-ITGA9		0.320579	0.2	7	5		FALSE		ITGA9	ITGA9	85.2		0	6	0	0.646774	FALSE	1	ITGA9	4396		0.22026
596649	taxon:9606	3.01077		3.63e-06	180231	1902	it alpha 7	gene	biological_process-&-1&-GO:0030198-&&-extracellular matrix organization-%%-GO:0007517-&&-muscle organ development-%%-GO:0034113-&&-heterotypic cell-cell adhesion-%%-GO:0035987-&&-endodermal cell differentiation-%%-GO:0007160-&&-cell-matrix adhesion-%%-GO:0008360-&&-regulation of cell shape-%%-GO:0007229-&&-integrin-mediated signaling pathway|cellular_component-&-1&-GO:0009986-&&-cell surface-%%-G…	G:9606:ITGA7		FALSE	KEGG-&-1&-hsa05410-&&-Hypertrophic cardiomyopathy (HCM)-%%-hsa05414-&&-Dilated cardiomyopathy (DCM)-%%-hsa04510-&&-Focal adhesion-%%-hsa05412-&&-Arrhythmogenic right ventricular cardiomyopathy (ARVC)-%%-hsa05165-&&-Human papillomavirus infection-%%-hsa04810-&&-Regulation of actin cytoskeleton-%%-hsa04151-&&-PI3K-Akt signaling pathway-%%-hsa04512-&&-ECM-receptor interaction	ITGA7	Homo sapiens (Human)-&&-9606	Gene Symbol-&-1&-ITGA7		0.332141	0.138889	11	5		FALSE		ITGA7	ITGA7	63.1111		0	10	0	0.664872	FALSE	1	ITGA7	5192		0.125055
596650	taxon:9606	3.0859		1.5e-07	180228	1902	integrin subunit alpha E	gene	biological_process-&-1&-GO:0030198-&&-extracellular matrix organization-%%-GO:0007155-&&-cell adhesion-%%-GO:0007229-&&-integrin-mediated signaling pathway|cellular_component-&-1&-GO:0005886-&&-plasma membrane-%%-GO:0009897-&&-external side of plasma membrane-%%-GO:0008305-&&-integrin complex|molecular_function-&-1&-GO:0046872-&&-metal ion binding	G:9606:ITGAE		FALSE	KEGG-&-1&-hsa04810-&&-Regulation of actin cytoskeleton	ITGAE	Homo sapiens (Human)-&&-9606	Gene Symbol-&-1&-ITGAE		0.324055	0.333333	4	5		FALSE		ITGAE	ITGAE	159		0	4	0	0.65235	FALSE	0	ITGAE	514		0.263704
596651	taxon:9606	3.03205		5.4e-07	180229	1902	integrin subunit alpha D	gene	biological_process-&-1&-GO:0006955-&&-immune response-%%-GO:0030198-&&-extracellular matrix organization-%%-GO:0034113-&&-heterotypic cell-cell adhesion-%%-GO:0007229-&&-integrin-mediated signaling pathway|cellular_component-&-1&-GO:0009986-&&-cell surface-%%-GO:0005886-&&-plasma membrane-%%-GO:0008305-&&-integrin complex|molecular_function-&-1&-GO:0046872-&&-metal ion binding	G:9606:ITGAD		FALSE	KEGG-&-1&-hsa04810-&&-Regulation of actin cytoskeleton	ITGAD	Homo sapiens (Human)-&&-9606	Gene Symbol-&-1&-ITGAD		0.32981	0.333333	4	5		FALSE		ITGAD	ITGAD	135		0	4	0	0.661325	FALSE	0	ITGAD	1414		0.258142
596652	taxon:9606	2.38821	249.979	0.00012953	180234	1902	heterogeneous nuclear ribonucleoprotein H3	gene	biological_process-&-1&-GO:0006396-&&-RNA processing-%%-GO:0008380-&&-RNA splicing-%%-GO:0000398-&&-mRNA splicing, via spliceosome-%%-GO:0030855-&&-epithelial cell differentiation|cellular_component-&-1&-GO:0005634-&&-nucleus-%%-GO:0005681-&&-spliceosomal complex-%%-GO:0005654-&&-nucleoplasm|molecular_function-&-1&-GO:0000166-&&-nucleotide binding-%%-GO:0003723-&&-RNA binding-%%-GO:0005515-&&-pro…	G:9606:HNRNPH3		FALSE		HNRNPH3	Homo sapiens (Human)-&&-9606	Gene Symbol-&-1&-HNRNPH3	0.502472	0.418724	0.258003	88	4	0.0240528	FALSE	27.2917	HNRNPH3	HNRNPH3	251.128	28.212	0	87	0	0.768632	FALSE	1	HNRNPH3	389892	Infinity	0.0533584
596653	taxon:9606	2.3959	342.555	0.00019446	180235	1902	heterogeneous nuclear ribonucleoprotein H2	gene	biological_process-&-1&-GO:0010467-&&-gene expression-%%-GO:0000398-&&-mRNA splicing, via spliceosome|cellular_component-&-1&-GO:0030529-&&-intracellular ribonucleoprotein complex-%%-GO:0005634-&&-nucleus-%%-GO:0005829-&&-cytosol-%%-GO:0005654-&&-nucleoplasm-%%-GO:0016020-&&-membrane|molecular_function-&-1&-GO:0000166-&&-nucleotide binding-%%-GO:0003723-&&-RNA binding-%%-GO:0005515-&&-protein bin…	G:9606:HNRNPH2		FALSE		HNRNPH2	Homo sapiens (Human)-&&-9606	Gene Symbol-&-1&-HNRNPH2	0.50343	0.41738	0.212533	101	4	0.024098	FALSE	27.1944	HNRNPH2	HNRNPH2	207.889	28.0289	0	100	0	0.76735	FALSE	1	HNRNPH2	509158	Infinity	0.044882
596654	taxon:9606	2.5859		0.00010841	180232	1902	integrin subunit alpha 5	gene	biological_process-&-1&-GO:0030335-&&-positive regulation of cell migration-%%-GO:0050900-&&-leukocyte migration-%%-GO:0030198-&&-extracellular matrix organization-%%-GO:0046718-&&-viral entry into host cell-%%-GO:0007157-&&-heterophilic cell-cell adhesion via plasma membrane cell adhesion molecules-%%-GO:0007229-&&-integrin-mediated signaling pathway-%%-GO:0050731-&&-positive regulation of pepti…	G:9606:ITGA5		FALSE	KEGG-&-1&-hsa05206-&&-MicroRNAs in cancer-%%-hsa05133-&&-Pertussis-%%-hsa04510-&&-Focal adhesion-%%-hsa05205-&&-Proteoglycans in cancer-%%-hsa05165-&&-Human papillomavirus infection-%%-hsa04810-&&-Regulation of actin cytoskeleton-%%-hsa04151-&&-PI3K-Akt signaling pathway-%%-hsa04512-&&-ECM-receptor interaction-%%-hsa05410-&&-Hypertrophic cardiomyopathy (HCM)-%%-hsa04145-&&-Phagosome-%%-hsa05414-&…	ITGA5	Homo sapiens (Human)-&&-9606	Gene Symbol-&-1&-ITGA5		0.386713	0.0935897	40	4		FALSE		ITGA5	ITGA5	148.775		0	40	0	0.735684	FALSE	0	ITGA5	197968		0.0463462
596655	taxon:9606	2.17526	3734.57	0.00082348	180233	1902	heterogeneous nuclear ribonucleoprotein K	gene	biological_process-&-1&-GO:0006396-&&-RNA processing-%%-GO:1902165-&&-regulation of intrinsic apoptotic signaling pathway in response to DNA damage by p53 class mediator-%%-GO:0007165-&&-signal transduction-%%-GO:0045716-&&-positive regulation of low-density lipoprotein particle receptor biosynthetic process-%%-GO:0048260-&&-positive regulation of receptor-mediated endocytosis-%%-GO:0072369-&&-re…	G:9606:HNRNPK		FALSE	KEGG-&-1&-hsa05206-&&-MicroRNAs in cancer-%%-hsa05168-&&-Herpes simplex infection-%%-hsa05203-&&-Viral carcinogenesis-%%-hsa03040-&&-Spliceosome	HNRNPK	Homo sapiens (Human)-&&-9606	Gene Symbol-&-1&-HNRNPK	0.539184	0.459716	0.146731	246	4	0.0557661	FALSE	42.3711	HNRNPK	HNRNPK	212.025	65.9862	0	245	0	0.804124	FALSE	1	HNRNPK	3123272	Infinity	0.03423
596656	taxon:9606	2.27692	852.846	0.00036562	180238	1902	heterogeneous nuclear ribonucleoprotein F	gene	biological_process-&-1&-GO:0006396-&&-RNA processing-%%-GO:0043484-&&-regulation of RNA splicing-%%-GO:0010467-&&-gene expression-%%-GO:0000398-&&-mRNA splicing, via spliceosome-%%-GO:0008543-&&-fibroblast growth factor receptor signaling pathway|cellular_component-&-1&-GO:0005634-&&-nucleus-%%-GO:0005829-&&-cytosol-%%-GO:0005654-&&-nucleoplasm-%%-GO:0071013-&&-catalytic step 2 spliceosome-%%-GO:…	G:9606:HNRNPF		FALSE		HNRNPF	Homo sapiens (Human)-&&-9606	Gene Symbol-&-1&-HNRNPF	0.51743	0.439189	0.170344	148	4	0.0354543	FALSE	31.0909	HNRNPF	HNRNPF	225.757	35.1326	0	148	0	0.787179	FALSE	0	HNRNPF	1224130	Infinity	0.0410368
596657	taxon:9606	2.22436	1873.41	0.00125802	180239	1902	heterogeneous nuclear ribonucleoprotein D	gene	biological_process-&-1&-GO:0097167-&&-circadian regulation of translation-%%-GO:0000723-&&-telomere maintenance-%%-GO:0021549-&&-cerebellum development-%%-GO:1901355-&&-response to rapamycin-%%-GO:0051592-&&-response to calcium ion-%%-GO:0006401-&&-RNA catabolic process-%%-GO:0045727-&&-positive regulation of translation-%%-GO:0042752-&&-regulation of circadian rhythm-%%-GO:1905663-&&-positive re…	G:9606:HNRNPD		FALSE		HNRNPD	Homo sapiens (Human)-&&-9606	Gene Symbol-&-1&-HNRNPD	0.524831	0.449568	0.108441	218	4	0.0394915	FALSE	32.9708	HNRNPD	HNRNPD	170.014	42.2416	0	217	0	0.79594	FALSE	1	HNRNPD	2850992	Infinity	0.0291648
596658	taxon:9606	2.25308	1355.24	0.00047669	180236	1902	heterogeneous nuclear ribonucleoprotein H1	gene	biological_process-&-1&-GO:0008543-&&-fibroblast growth factor receptor signaling pathway-%%-GO:0006396-&&-RNA processing-%%-GO:0010467-&&-gene expression-%%-GO:0000398-&&-mRNA splicing, via spliceosome-%%-GO:0043484-&&-regulation of RNA splicing|cellular_component-&-1&-GO:0005634-&&-nucleus-%%-GO:0005829-&&-cytosol-%%-GO:0005654-&&-nucleoplasm-%%-GO:0071013-&&-catalytic step 2 spliceosome-%%-GO:…	G:9606:HNRNPH1		FALSE		HNRNPH1	Homo sapiens (Human)-&&-9606	Gene Symbol-&-1&-HNRNPH1	0.525249	0.443837	0.165649	176	4	0.0411093	FALSE	34.1752	HNRNPH1	HNRNPH1	211.381	42.9552	0	176	0	0.791154	FALSE	0	HNRNPH1	1531928	Infinity	0.0373774
596659	taxon:9606	2.24321	1674.43	0.00037273	180242	1902	heterogeneous nuclear ribonucleoprotein A2/B1	gene	biological_process-&-1&-GO:1990428-&&-miRNA transport-%%-GO:0000122-&&-negative regulation of transcription from RNA polymerase II promoter-%%-GO:0000398-&&-mRNA splicing, via spliceosome-%%-GO:1905663-&&-positive regulation of telomerase RNA reverse transcriptase activity-%%-GO:0044806-&&-G-quadruplex DNA unwinding-%%-GO:0050658-&&-RNA transport-%%-GO:0010467-&&-gene expression-%%-GO:0048025-&&-…	G:9606:HNRNPA2B1		FALSE		HNRNPA2B1	Homo sapiens (Human)-&&-9606	Gene Symbol-&-1&-HNRNPA2B1	0.526295	0.445791	0.164807	175	4	0.0421967	FALSE	33.9429	HNRNPA2B1	HNRNPA2B1	216.647	42.5228	0	174	0	0.792799	FALSE	1	HNRNPA2B1	1381076	Infinity	0.0377556
596660	taxon:9606	3.0291		3.96e-06	163858	1902	A-kinase anchoring protein 14	gene	cellular_component-&-1&-GO:0005737-&&-cytoplasm	G:9606:AKAP14		FALSE		AKAP14	Homo sapiens (Human)-&&-9606	Gene Symbol-&-1&-AKAP14		0.330131	0.222222	9	5		FALSE		AKAP14	AKAP14	62.5556		0	9	0	0.661816	FALSE	0	AKAP14	4264		0.135911
596661	taxon:9606	2.0541	5038.84	0.00392442	180243	1902	heterogeneous nuclear ribonucleoprotein A1	gene	biological_process-&-1&-GO:0051028-&&-mRNA transport-%%-GO:0051170-&&-nuclear import-%%-GO:0000398-&&-mRNA splicing, via spliceosome-%%-GO:0032212-&&-positive regulation of telomere maintenance via telomerase-%%-GO:0008543-&&-fibroblast growth factor receptor signaling pathway-%%-GO:0032211-&&-negative regulation of telomere maintenance via telomerase-%%-GO:0006405-&&-RNA export from nucleus-%%-G…	G:9606:HNRNPA1		FALSE	KEGG-&-1&-hsa03040-&&-Spliceosome	HNRNPA1	Homo sapiens (Human)-&&-9606	Gene Symbol-&-1&-HNRNPA1	0.550417	0.486831	0.0898074	433	4	0.0691679	FALSE	53.3934	HNRNPA1	HNRNPA1	147.879	101.214	0	432	0	0.824316	FALSE	1	HNRNPA1	8921146	Infinity	0.0212834
596662	taxon:9606	2.25397	1508.06	0.0004677	180240	1902	C (C1/C2)	gene	biological_process-&-1&-GO:0043044-&&-ATP-dependent chromatin remodeling-%%-GO:0001649-&&-osteoblast differentiation-%%-GO:0000398-&&-mRNA splicing, via spliceosome-%%-GO:0032211-&&-negative regulation of telomere maintenance via telomerase-%%-GO:0070935-&&-3'-UTR-mediated mRNA stabilization-%%-GO:0008380-&&-RNA splicing-%%-GO:0010467-&&-gene expression|cellular_component-&-1&-GO:0070062-&&-extra…	G:9606:HNRNPC		FALSE	KEGG-&-1&-hsa03040-&&-Spliceosome	HNRNPC	Homo sapiens (Human)-&&-9606	Gene Symbol-&-1&-HNRNPC	0.520284	0.443661	0.161616	146	4	0.0360919	FALSE	28.5812	HNRNPC	HNRNPC	237.75	33.0983	0	145	0	0.791004	FALSE	1	HNRNPC	1422298	Infinity	0.0418611
596663	taxon:9606	2.38782	174.407	0.00011187	180241	1902	heterogeneous nuclear ribonucleoprotein A/B	gene	biological_process-&-1&-GO:0001837-&&-epithelial to mesenchymal transition-%%-GO:0045893-&&-positive regulation of transcription, DNA-templated|cellular_component-&-1&-GO:0030529-&&-intracellular ribonucleoprotein complex-%%-GO:0090575-&&-RNA polymerase II transcription factor complex-%%-GO:0005654-&&-nucleoplasm-%%-GO:0005634-&&-nucleus-%%-GO:0005737-&&-cytoplasm|molecular_function-&-1&-GO:00001…	G:9606:HNRNPAB		FALSE		HNRNPAB	Homo sapiens (Human)-&&-9606	Gene Symbol-&-1&-HNRNPAB	0.503238	0.418792	0.251866	79	4	0.0239433	FALSE	23.2698	HNRNPAB	HNRNPAB	280.38	23.7072	0	79	0	0.768697	FALSE	0	HNRNPAB	347272	Infinity	0.059425
596664	taxon:9606	3.05385		4e-08	180246	1902	one cut homeobox 1	gene	biological_process-&-1&-GO:0006366-&&-transcription from RNA polymerase II promoter-%%-GO:0007219-&&-Notch signaling pathway-%%-GO:0030335-&&-positive regulation of cell migration-%%-GO:0007492-&&-endoderm development-%%-GO:0002064-&&-epithelial cell development-%%-GO:0030512-&&-negative regulation of transforming growth factor beta receptor signaling pathway-%%-GO:0009653-&&-anatomical structure…	G:9606:ONECUT1		FALSE	KEGG-&-1&-hsa04950-&&-Maturity onset diabetes of the young-%%-hsa04550-&&-Signaling pathways regulating pluripotency of stem cells	ONECUT1	Homo sapiens (Human)-&&-9606	Gene Symbol-&-1&-ONECUT1		0.327456	0.333333	4	5		FALSE		ONECUT1	ONECUT1	199.25		0	4	0	0.657692	FALSE	0	ONECUT1	254		0.32947
596665	taxon:9606	2.98885		5.64e-06	163862	1902	motile sperm domain containing 2	gene	biological_process-&-1&-GO:0043312-&&-neutrophil degranulation|cellular_component-&-1&-GO:0035579-&&-specific granule membrane-%%-GO:0016021-&&-integral component of membrane-%%-GO:0005886-&&-plasma membrane-%%-GO:0016020-&&-membrane	G:9606:MOSPD2		FALSE		MOSPD2	Homo sapiens (Human)-&&-9606	Gene Symbol-&-1&-MOSPD2		0.334577	0	8	5		FALSE		MOSPD2	MOSPD2	108.875		0	8	0	0.668526	FALSE	0	MOSPD2	10466		0.16029
596666	taxon:9606	2.86256		7.29e-06	180247	1902	hepatocyte nuclear factor 4 gamma	gene	biological_process-&-1&-GO:0006367-&&-transcription initiation from RNA polymerase II promoter-%%-GO:0030522-&&-intracellular receptor signaling pathway-%%-GO:0006357-&&-regulation of transcription from RNA polymerase II promoter-%%-GO:0045944-&&-positive regulation of transcription from RNA polymerase II promoter-%%-GO:0043401-&&-steroid hormone mediated signaling pathway|cellular_component-&-1&…	G:9606:HNF4G		FALSE	KEGG-&-1&-hsa04950-&&-Maturity onset diabetes of the young	HNF4G	Homo sapiens (Human)-&&-9606	Gene Symbol-&-1&-HNF4G		0.349337	0.0384615	13	4		FALSE		HNF4G	HNF4G	126.077		0	13	0	0.689573	FALSE	0	HNF4G	14580		0.100468
596667	taxon:9606	2.76667		0	163867	1902	fatty acid amide hydrolase 2	gene	biological_process-&-1&-GO:0019369-&&-arachidonic acid metabolic process|cellular_component-&-1&-GO:0016021-&&-integral component of membrane-%%-GO:0005811-&&-lipid particle|molecular_function-&-1&-GO:0102077-&&-oleamide hydrolase activity-%%-GO:0103073-&&-anandamide amidohydrolase activity-%%-GO:0017064-&&-fatty acid amide hydrolase activity	G:9606:FAAH2		FALSE		FAAH2	Homo sapiens (Human)-&&-9606	Gene Symbol-&-1&-FAAH2		0.361446	0	1	4		FALSE		FAAH2	FAAH2	2132		0	1	0	0.705556	FALSE	0	FAAH2	0		0
596668	taxon:9606	2.48256	149.54	0.00016048	180248	1902	hepatocyte nuclear factor 4 alpha	gene	biological_process-&-1&-GO:0030308-&&-negative regulation of cell growth-%%-GO:0023019-&&-signal transduction involved in regulation of gene expression-%%-GO:0045893-&&-positive regulation of transcription, DNA-templated-%%-GO:0006629-&&-lipid metabolic process-%%-GO:0006591-&&-ornithine metabolic process-%%-GO:0006805-&&-xenobiotic metabolic process-%%-GO:0008285-&&-negative regulation of cell p…	G:9606:HNF4A		FALSE	KEGG-&-1&-hsa04950-&&-Maturity onset diabetes of the young-%%-hsa04152-&&-AMPK signaling pathway	HNF4A	Homo sapiens (Human)-&&-9606	Gene Symbol-&-1&-HNF4A	0.478277	0.402809	0.157477	77	4	0.00835792	FALSE	14.0732	HNF4A	HNF4A	154.147	14.4453	0	76	0	0.752906	FALSE	1	HNF4A	356288	Infinity	0.0385656
596669	taxon:9606	2.70179		4.999e-05	180249	1902	forkhead box A3	gene	biological_process-&-1&-GO:0016569-&&-covalent chromatin modification-%%-GO:0045944-&&-positive regulation of transcription from RNA polymerase II promoter-%%-GO:0007283-&&-spermatogenesis-%%-GO:0009267-&&-cellular response to starvation-%%-GO:0030154-&&-cell differentiation-%%-GO:0001678-&&-cellular glucose homeostasis-%%-GO:0006351-&&-transcription, DNA-templated-%%-GO:0007275-&&-multicellular …	G:9606:FOXA3		FALSE	KEGG-&-1&-hsa04950-&&-Maturity onset diabetes of the young	FOXA3	Homo sapiens (Human)-&&-9606	Gene Symbol-&-1&-FOXA3		0.370124	0.05	40	4		FALSE		FOXA3	FOXA3	105.35		0	40	0	0.716368	FALSE	0	FOXA3	99058		0.0449039
596670	taxon:9606	2.38474	559.523	0.00047079	180254	1902	nuclear receptor subfamily 4 group A member 1	gene	biological_process-&-1&-GO:0006367-&&-transcription initiation from RNA polymerase II promoter-%%-GO:0061469-&&-regulation of type B pancreatic cell proliferation-%%-GO:0045444-&&-fat cell differentiation-%%-GO:0045786-&&-negative regulation of cell cycle-%%-GO:0007165-&&-signal transduction-%%-GO:0035767-&&-endothelial cell chemotaxis-%%-GO:0071376-&&-cellular response to corticotropin-releasing…	G:9606:NR4A1		FALSE	KEGG-&-1&-hsa04934-&&-Cushing syndrome-%%-hsa04010-&&-MAPK signaling pathway-%%-hsa04925-&&-Aldosterone synthesis and secretion-%%-hsa04927-&&-Cortisol synthesis and secretion-%%-hsa04151-&&-PI3K-Akt signaling pathway	NR4A1	Homo sapiens (Human)-&&-9606	Gene Symbol-&-1&-NR4A1	0.499811	0.419332	0.0735624	106	4	0.0123233	FALSE	13.2769	NR4A1	NR4A1	137.519	14.2083	0	105	0	0.769209	FALSE	1	NR4A1	826708	Infinity	0.029237
596671	taxon:9606	2.72154		0	163870	1902	chondrosarcoma associated gene 1	gene		G:9606:CSAG1		FALSE		CSAG1	Homo sapiens (Human)-&&-9606	Gene Symbol-&-1&-CSAG1		0.367439	1	3	4		FALSE		CSAG1	CSAG1	884		0	3	0	0.713077	FALSE	0	CSAG1	0		0.369874
596672	taxon:9606	2.52628		0.00016173	180255	1902	heme oxygenase 2	gene	biological_process-&-1&-GO:0006979-&&-response to oxidative stress-%%-GO:0042167-&&-heme catabolic process-%%-GO:0043312-&&-neutrophil degranulation-%%-GO:0001666-&&-response to hypoxia-%%-GO:0006879-&&-cellular iron ion homeostasis-%%-GO:0006788-&&-heme oxidation-%%-GO:0055072-&&-iron ion homeostasis|cellular_component-&-1&-GO:0035579-&&-specific granule membrane-%%-GO:0005886-&&-plasma membrane…	G:9606:HMOX2		FALSE	KEGG-&-1&-hsa01100-&&-Metabolic pathways-%%-hsa00860-&&-Porphyrin and chlorophyll metabolism-%%-hsa04978-&&-Mineral absorption	HMOX2	Homo sapiens (Human)-&&-9606	Gene Symbol-&-1&-HMOX2		0.395839	0.048718	40	4		FALSE		HMOX2	HMOX2	140.425		0	40	0	0.74562	FALSE	0	HMOX2	230630		0.0380914
596673	taxon:9606	2.26051	505.227	0.00024753	180258	1902	high mobility group AT-hook 1	gene	biological_process-&-1&-GO:0006268-&&-DNA unwinding involved in DNA replication-%%-GO:0031936-&&-negative regulation of chromatin silencing-%%-GO:0006284-&&-base-excision repair-%%-GO:0006337-&&-nucleosome disassembly-%%-GO:0006355-&&-regulation of transcription, DNA-templated-%%-GO:0045893-&&-positive regulation of transcription, DNA-templated-%%-GO:0045892-&&-negative regulation of transcriptio…	G:9606:HMGA1		FALSE		HMGA1	Homo sapiens (Human)-&&-9606	Gene Symbol-&-1&-HMGA1	0.501709	0.442377	0.142271	86	4	0.0160485	FALSE	13.6719	HMGA1	HMGA1	215.453	14.1956	0	86	0	0.789915	FALSE	0	HMGA1	661306	Infinity	0.0378566
596674	taxon:9606	2.70269		2.2e-07	180259	1902	hylglutaryl-CoA synthase 2	gene	biological_process-&-1&-GO:0008299-&&-isoprenoid biosynthetic process-%%-GO:0006695-&&-cholesterol biosynthetic process-%%-GO:0046951-&&-ketone body biosynthetic process|cellular_component-&-1&-GO:0005759-&&-mitochondrial matrix-%%-GO:0005739-&&-mitochondrion-%%-GO:0005743-&&-mitochondrial inner membrane|molecular_function-&-1&-GO:0004421-&&-hydroxymethylglutaryl-CoA synthase activity	G:9606:HMGCS2		FALSE	KEGG-&-1&-hsa00280-&&-Valine, leucine and isoleucine degradation-%%-hsa00072-&&-Synthesis and degradation of ketone bodies-%%-hsa01100-&&-Metabolic pathways-%%-hsa00650-&&-Butanoate metabolism-%%-hsa00900-&&-Terpenoid backbone biosynthesis-%%-hsa03320-&&-PPAR signaling pathway	HMGCS2	Homo sapiens (Human)-&&-9606	Gene Symbol-&-1&-HMGCS2		0.370001	0.333333	3	4		FALSE		HMGCS2	HMGCS2	879.667		0	3	0	0.716218	FALSE	0	HMGCS2	2290		0.351593
596675	taxon:9606	2.85436		2.067e-05	180256	1902	heme oxygenase 1	gene	biological_process-&-1&-GO:0006979-&&-response to oxidative stress-%%-GO:0006879-&&-cellular iron ion homeostasis-%%-GO:0045080-&&-positive regulation of chemokine biosynthetic process-%%-GO:0034605-&&-cellular response to heat-%%-GO:0008217-&&-regulation of blood pressure-%%-GO:0043433-&&-negative regulation of sequence-specific DNA binding transcription factor activity-%%-GO:0043524-&&-negative…	G:9606:HMOX1	HMOX1	TRUE	KEGG-&-1&-hsa05206-&&-MicroRNAs in cancer-%%-hsa05418-&&-Fluid shear stress and atherosclerosis-%%-hsa04216-&&-Ferroptosis-%%-hsa05225-&&-Hepatocellular carcinoma-%%-hsa01100-&&-Metabolic pathways-%%-hsa04066-&&-HIF-1 signaling pathway-%%-hsa00860-&&-Porphyrin and chlorophyll metabolism-%%-hsa04978-&&-Mineral absorption-%%-hsa05200-&&-Pathways in cancer	HMOX1	Homo sapiens (Human)-&&-9606	Gene Symbol-&-1&-HMOX1		0.350341	0.0661765	19	4		FALSE		HMOX1	HMOX1	96.2353		0	18	0	0.69094	FALSE	1	HMOX1	29638		0.0760037
596676	taxon:9606	2.89218		1.27e-06	163872	1902	prune homolog 2	gene	biological_process-&-1&-GO:0006915-&&-apoptotic process|cellular_component-&-1&-GO:0005737-&&-cytoplasm|molecular_function-&-1&-GO:0016462-&&-pyrophosphatase activity-%%-GO:0046872-&&-metal ion binding	G:9606:PRUNE2		FALSE		PRUNE2	Homo sapiens (Human)-&&-9606	Gene Symbol-&-1&-PRUNE2		0.34576	0.454545	12	4		FALSE		PRUNE2	PRUNE2	145.583		0	12	0	0.684637	FALSE	0	PRUNE2	4258		0.137264
596677	taxon:9606	2.72513		3.774e-05	180257	1902	hyaluronan mediated motility receptor	gene	biological_process-&-1&-GO:0030214-&&-hyaluronan catabolic process-%%-GO:0000086-&&-G2/M transition of mitotic cell cycle|cellular_component-&-1&-GO:0009986-&&-cell surface-%%-GO:0005829-&&-cytosol-%%-GO:0005886-&&-plasma membrane-%%-GO:0016020-&&-membrane|molecular_function-&-1&-GO:0005540-&&-hyaluronic acid binding-%%-GO:0005515-&&-protein binding	G:9606:HMMR		FALSE	KEGG-&-1&-hsa04512-&&-ECM-receptor interaction	HMMR	Homo sapiens (Human)-&&-9606	Gene Symbol-&-1&-HMMR		0.366955	0.0812808	29	4		FALSE		HMMR	HMMR	123.379		0	29	0	0.712479	FALSE	0	HMMR	68342		0.056631
596678	taxon:9606	2.70385		1.188e-05	163878	1902	thiosulfate sulfurtransferase like domain containing 2	gene	biological_process-&-1&-GO:0008150-&&-biological_process|cellular_component-&-1&-GO:0005575-&&-cellular_component|molecular_function-&-1&-GO:0003674-&&-molecular_function-%%-GO:0005515-&&-protein binding	G:9606:TSTD2		FALSE		TSTD2	Homo sapiens (Human)-&&-9606	Gene Symbol-&-1&-TSTD2		0.369844	0.0916667	16	4		FALSE		TSTD2	TSTD2	207.688		0	16	0	0.716026	FALSE	0	TSTD2	29980		0.0870695
596679	taxon:9606	2.76679		7.114e-05	180261	1902	3-hydroxy-3-methylglutaryl-CoA reductase	gene	biological_process-&-1&-GO:0048661-&&-positive regulation of smooth muscle cell proliferation-%%-GO:0061179-&&-negative regulation of insulin secretion involved in cellular response to glucose stimulus-%%-GO:0070374-&&-positive regulation of ERK1 and ERK2 cascade-%%-GO:0055114-&&-oxidation-reduction process-%%-GO:0008299-&&-isoprenoid biosynthetic process-%%-GO:0015936-&&-coenzyme A metabolic pro…	G:9606:HMGCR		FALSE	KEGG-&-1&-hsa04976-&&-Bile secretion-%%-hsa04152-&&-AMPK signaling pathway-%%-hsa01100-&&-Metabolic pathways-%%-hsa00900-&&-Terpenoid backbone biosynthesis	HMGCR	Homo sapiens (Human)-&&-9606	Gene Symbol-&-1&-HMGCR		0.361429	0.105072	26	4		FALSE		HMGCR	HMGCR	117.25		0	25	0	0.705534	FALSE	1	HMGCR	109522		0.061577
596680	taxon:9606	2.70756		6.039e-05	180266	1902	high mobility group nucleosome binding domain 1	gene	biological_process-&-1&-GO:0010225-&&-response to UV-C-%%-GO:0006325-&&-chromatin organization-%%-GO:0040034-&&-regulation of development, heterochronic-%%-GO:0000720-&&-pyrimidine dimer repair by nucleotide-excision repair-%%-GO:0006357-&&-regulation of transcription from RNA polymerase II promoter-%%-GO:0048597-&&-post-embryonic camera-type eye morphogenesis-%%-GO:1901666-&&-positive regulation…	G:9606:HMGN1		FALSE	KEGG-&-1&-hsa05168-&&-Herpes simplex infection	HMGN1	Homo sapiens (Human)-&&-9606	Gene Symbol-&-1&-HMGN1		0.369336	0.0861539	28	4		FALSE		HMGN1	HMGN1	140.038		0	27	0	0.715406	FALSE	1	HMGN1	94260		0.0600827
596681	taxon:9606	2.7491		7.66e-06	163880	1902	apoptosis inducing factor, mitochondria associated 3	gene	biological_process-&-1&-GO:0097194-&&-execution phase of apoptosis-%%-GO:0055114-&&-oxidation-reduction process-%%-GO:0045454-&&-cell redox homeostasis|cellular_component-&-1&-GO:0005634-&&-nucleus-%%-GO:0005829-&&-cytosol-%%-GO:0005783-&&-endoplasmic reticulum-%%-GO:0005743-&&-mitochondrial inner membrane-%%-GO:0005739-&&-mitochondrion|molecular_function-&-1&-GO:0016491-&&-oxidoreductase activit…	G:9606:AIFM3		FALSE		AIFM3	Homo sapiens (Human)-&&-9606	Gene Symbol-&-1&-AIFM3		0.363755	0.166667	4	4		FALSE		AIFM3	AIFM3	562.5		0	4	0	0.708483	FALSE	0	AIFM3	6492		0.255338
596682	taxon:9606	2.62628		5.8e-06	180265	1902	high mobility group nucleosomal binding domain 2	gene	cellular_component-&-1&-GO:0005737-&&-cytoplasm-%%-GO:0005634-&&-nucleus-%%-GO:0000785-&&-chromatin|molecular_function-&-1&-GO:0003723-&&-RNA binding-%%-GO:0005515-&&-protein binding-%%-GO:0031492-&&-nucleosomal DNA binding	G:9606:HMGN2		FALSE		HMGN2	Homo sapiens (Human)-&&-9606	Gene Symbol-&-1&-HMGN2		0.380766	0.171429	17	4		FALSE		HMGN2	HMGN2	310.133		0	16	0	0.728953	FALSE	1	HMGN2	28532		0.105527
596683	taxon:9606	2.62769		5.41e-06	180270	1902	hydroxymethylbilane synthase	gene	biological_process-&-1&-GO:0006783-&&-heme biosynthetic process-%%-GO:0006782-&&-protoporphyrinogen IX biosynthetic process-%%-GO:0018160-&&-peptidyl-pyrromethane cofactor linkage|cellular_component-&-1&-GO:0005829-&&-cytosol-%%-GO:0005737-&&-cytoplasm|molecular_function-&-1&-GO:0004418-&&-hydroxymethylbilane synthase activity	G:9606:HMBS		FALSE	KEGG-&-1&-hsa01100-&&-Metabolic pathways-%%-hsa00860-&&-Porphyrin and chlorophyll metabolism	HMBS	Homo sapiens (Human)-&&-9606	Gene Symbol-&-1&-HMBS		0.380562	0.194444	9	4		FALSE		HMBS	HMBS	386.111		0	9	0	0.728718	FALSE	0	HMBS	17950		0.129319
596684	taxon:9606	2.33936		0.0001019	180268	1902	high mobility group box 2	gene	biological_process-&-1&-GO:0032728-&&-positive regulation of interferon-beta production-%%-GO:0045087-&&-innate immune response-%%-GO:0060326-&&-cell chemotaxis-%%-GO:0050829-&&-defense response to Gram-negative bacterium-%%-GO:0032496-&&-response to lipopolysaccharide-%%-GO:0045892-&&-negative regulation of transcription, DNA-templated-%%-GO:0045893-&&-positive regulation of transcription, DNA-t…	G:9606:HMGB2		FALSE		HMGB2	Homo sapiens (Human)-&&-9606	Gene Symbol-&-1&-HMGB2		0.427468	0.13691	47	4		FALSE		HMGB2	HMGB2	274.489		0	47	0	0.776774	FALSE	0	HMGB2	292544		0.0536135
596685	taxon:9606	2.39551	681.387	0.00037267	180269	1902	high mobility group box 1	gene	biological_process-&-1&-GO:0043537-&&-negative regulation of blood vessel endothelial cell migration-%%-GO:0043371-&&-negative regulation of CD4-positive, alpha-beta T cell differentiation-%%-GO:0050716-&&-positive regulation of interleukin-1 secretion-%%-GO:0032425-&&-positive regulation of mismatch repair-%%-GO:0034165-&&-positive regulation of toll-like receptor 9 signaling pathway-%%-GO:00017…	G:9606:HMGB1		FALSE	KEGG-&-1&-hsa03410-&&-Base excision repair-%%-hsa04217-&&-Necroptosis-%%-hsa04140-&&-Autophagy - animal	HMGB1	Homo sapiens (Human)-&&-9606	Gene Symbol-&-1&-HMGB1	0.501519	0.417447	0.0797391	98	4	0.0128051	FALSE	9.80645	HMGB1	HMGB1	156.969	10.3373	0	98	0	0.767415	FALSE	0	HMGB1	822764	Infinity	0.0339239
596686	taxon:9606	2.74795		2.92e-06	163889	1902	salt inducible kinase 1	gene	biological_process-&-1&-GO:0002028-&&-regulation of sodium ion transport-%%-GO:0035556-&&-intracellular signal transduction-%%-GO:0010830-&&-regulation of myotube differentiation-%%-GO:2000210-&&-positive regulation of anoikis-%%-GO:0007346-&&-regulation of mitotic cell cycle-%%-GO:0045595-&&-regulation of cell differentiation-%%-GO:0045721-&&-negative regulation of gluconeogenesis-%%-GO:0046777-…	G:9606:SIK1		FALSE	KEGG-&-1&-hsa04922-&&-Glucagon signaling pathway	SIK1	Homo sapiens (Human)-&&-9606	Gene Symbol-&-1&-SIK1		0.363908	0.269231	13	4		FALSE		SIK1	SIK1	229.385		0	13	0	0.708675	FALSE	0	SIK1	8612		0.111115
596687	taxon:9606	2.99231		1.85e-06	180282	1902	HLF, PAR bZIP transcription factor	gene	biological_process-&-1&-GO:0048511-&&-rhythmic process-%%-GO:0006366-&&-transcription from RNA polymerase II promoter-%%-GO:0045944-&&-positive regulation of transcription from RNA polymerase II promoter-%%-GO:0007275-&&-multicellular organism development-%%-GO:0035914-&&-skeletal muscle cell differentiation|cellular_component-&-1&-GO:0005634-&&-nucleus|molecular_function-&-1&-GO:0003677-&&-DNA b…	G:9606:HLF		FALSE		HLF	Homo sapiens (Human)-&&-9606	Gene Symbol-&-1&-HLF		0.33419	0.454545	13	5		FALSE		HLF	HLF	83.1818		0	12	0	0.667949	FALSE	1	HLF	3508		0.135327
596688	taxon:9606	2.98038		3.3e-06	163899	1902	COMM domain containing 7	gene	biological_process-&-1&-GO:0033209-&&-tumor necrosis factor-mediated signaling pathway-%%-GO:0045892-&&-negative regulation of transcription, DNA-templated-%%-GO:0032088-&&-negative regulation of NF-kappaB transcription factor activity-%%-GO:0006351-&&-transcription, DNA-templated|cellular_component-&-1&-GO:0070062-&&-extracellular exosome-%%-GO:0043231-&&-intracellular membrane-bounded organelle…	G:9606:COMMD7		FALSE		COMMD7	Homo sapiens (Human)-&&-9606	Gene Symbol-&-1&-COMMD7		0.335527	0.555556	9	4		FALSE		COMMD7	COMMD7	124.333		0	9	0	0.669936	FALSE	0	COMMD7	6394		0.157984
596689	taxon:9606	2.90692		3.88e-05	180280	1902	major histocompatibility complex, class I, E	gene	biological_process-&-1&-GO:0001916-&&-positive regulation of T cell mediated cytotoxicity-%%-GO:0002480-&&-antigen processing and presentation of exogenous peptide antigen via MHC class I, TAP-independent-%%-GO:0002474-&&-antigen processing and presentation of peptide antigen via MHC class I-%%-GO:0042270-&&-protection from natural killer cell mediated cytotoxicity-%%-GO:0032759-&&-positive regul…	G:9606:HLA-E	HLA-E	TRUE	KEGG-&-1&-hsa04612-&&-Antigen processing and presentation-%%-hsa05416-&&-Viral myocarditis-%%-hsa05168-&&-Herpes simplex infection-%%-hsa04514-&&-Cell adhesion molecules (CAMs)-%%-hsa05163-&&-Human cytomegalovirus infection-%%-hsa05170-&&-Human immunodeficiency virus 1 infection-%%-hsa04940-&&-Type I diabetes mellitus-%%-hsa05167-&&-Kaposi sarcoma-associated herpesvirus infection-%%-hsa05320-&&-A…	HLA-E	Homo sapiens (Human)-&&-9606	Gene Symbol-&-1&-HLA-E		0.344006	0.0455841	29	4		FALSE		HLA-E	HLA-E	42.9259		0	28	0	0.682179	FALSE	1	HLA-E	41288		0.0455504
596690	taxon:9606	2.79731		3.72e-06	180286	1902	major histocompatibility complex, class II, DR beta 5	gene	biological_process-&-1&-GO:0031295-&&-T cell costimulation-%%-GO:0019886-&&-antigen processing and presentation of exogenous peptide antigen via MHC class II-%%-GO:0050852-&&-T cell receptor signaling pathway-%%-GO:0060333-&&-interferon-gamma-mediated signaling pathway|cellular_component-&-1&-GO:0000139-&&-Golgi membrane-%%-GO:0042613-&&-MHC class II protein complex-%%-GO:0005765-&&-lysosomal mem…	G:9606:HLA-DRB5		FALSE	KEGG-&-1&-hsa04612-&&-Antigen processing and presentation-%%-hsa05416-&&-Viral myocarditis-%%-hsa05168-&&-Herpes simplex infection-%%-hsa04514-&&-Cell adhesion molecules (CAMs)-%%-hsa05310-&&-Asthma-%%-hsa05150-&&-Staphylococcus aureus infection-%%-hsa05323-&&-Rheumatoid arthritis-%%-hsa04940-&&-Type I diabetes mellitus-%%-hsa05322-&&-Systemic lupus erythematosus-%%-hsa05320-&&-Autoimmune thyroid…	HLA-DRB5	Homo sapiens (Human)-&&-9606	Gene Symbol-&-1&-HLA-DRB5		0.357487	0.327273	11	4		FALSE		HLA-DRB5	HLA-DRB5	255.727		0	11	0	0.700449	FALSE	0	HLA-DRB5	9912		0.155457
596691	taxon:9606	2.82179		8.07e-06	180287	1902	major histocompatibility complex, class II, DR beta 4	gene	biological_process-&-1&-GO:0031295-&&-T cell costimulation-%%-GO:0019886-&&-antigen processing and presentation of exogenous peptide antigen via MHC class II-%%-GO:0050852-&&-T cell receptor signaling pathway-%%-GO:0060333-&&-interferon-gamma-mediated signaling pathway|cellular_component-&-1&-GO:0000139-&&-Golgi membrane-%%-GO:0005765-&&-lysosomal membrane-%%-GO:0012507-&&-ER to Golgi transport v…	G:9606:HLA-DRB4		FALSE	KEGG-&-1&-hsa04612-&&-Antigen processing and presentation-%%-hsa05416-&&-Viral myocarditis-%%-hsa05168-&&-Herpes simplex infection-%%-hsa04514-&&-Cell adhesion molecules (CAMs)-%%-hsa05310-&&-Asthma-%%-hsa05150-&&-Staphylococcus aureus infection-%%-hsa05323-&&-Rheumatoid arthritis-%%-hsa05322-&&-Systemic lupus erythematosus-%%-hsa04940-&&-Type I diabetes mellitus-%%-hsa05320-&&-Autoimmune thyroid…	HLA-DRB4	Homo sapiens (Human)-&&-9606	Gene Symbol-&-1&-HLA-DRB4		0.354384	0.194444	9	4		FALSE		HLA-DRB4	HLA-DRB4	276.556		0	9	0	0.696368	FALSE	0	HLA-DRB4	13892		0.186184
596692	taxon:9606	2.76731		0.00013031	180291	1902	major histocompatibility complex, class II, DR alpha	gene	biological_process-&-1&-GO:0031295-&&-T cell costimulation-%%-GO:0006955-&&-immune response-%%-GO:0019886-&&-antigen processing and presentation of exogenous peptide antigen via MHC class II-%%-GO:0050852-&&-T cell receptor signaling pathway-%%-GO:0050890-&&-cognition-%%-GO:0002503-&&-peptide antigen assembly with MHC class II protein complex-%%-GO:0060333-&&-interferon-gamma-mediated signaling p…	G:9606:HLA-DRA	HLA-DRA	TRUE	KEGG-&-1&-hsa04612-&&-Antigen processing and presentation-%%-hsa05416-&&-Viral myocarditis-%%-hsa05168-&&-Herpes simplex infection-%%-hsa04514-&&-Cell adhesion molecules (CAMs)-%%-hsa05310-&&-Asthma-%%-hsa05150-&&-Staphylococcus aureus infection-%%-hsa05322-&&-Systemic lupus erythematosus-%%-hsa05323-&&-Rheumatoid arthritis-%%-hsa04940-&&-Type I diabetes mellitus-%%-hsa05320-&&-Autoimmune thyroid…	HLA-DRA	Homo sapiens (Human)-&&-9606	Gene Symbol-&-1&-HLA-DRA		0.361362	0.046371	34	4		FALSE		HLA-DRA	HLA-DRA	98.375		0	33	0	0.705449	FALSE	1	HLA-DRA	223216		0.053389
596693	taxon:9606	2.80833		1.977e-05	180288	1902	major histocompatibility complex, class II, DR beta 3	gene	biological_process-&-1&-GO:0031295-&&-T cell costimulation-%%-GO:0019886-&&-antigen processing and presentation of exogenous peptide antigen via MHC class II-%%-GO:0050852-&&-T cell receptor signaling pathway-%%-GO:0060333-&&-interferon-gamma-mediated signaling pathway-%%-GO:0007165-&&-signal transduction|cellular_component-&-1&-GO:0000139-&&-Golgi membrane-%%-GO:0042613-&&-MHC class II protein c…	G:9606:HLA-DRB3		FALSE	KEGG-&-1&-hsa05416-&&-Viral myocarditis-%%-hsa04612-&&-Antigen processing and presentation-%%-hsa05168-&&-Herpes simplex infection-%%-hsa04514-&&-Cell adhesion molecules (CAMs)-%%-hsa05310-&&-Asthma-%%-hsa05150-&&-Staphylococcus aureus infection-%%-hsa05322-&&-Systemic lupus erythematosus-%%-hsa05323-&&-Rheumatoid arthritis-%%-hsa04940-&&-Type I diabetes mellitus-%%-hsa05320-&&-Autoimmune thyroid…	HLA-DRB3	Homo sapiens (Human)-&&-9606	Gene Symbol-&-1&-HLA-DRB3		0.356083	0.106061	12	4		FALSE		HLA-DRB3	HLA-DRB3	219.833		0	12	0	0.698611	FALSE	0	HLA-DRB3	27414		0.138942
596694	taxon:9606	3.23115		2.2e-07	180294	1902	major histocompatibility complex, class II, DQ beta 1	gene	biological_process-&-1&-GO:0031295-&&-T cell costimulation-%%-GO:0002381-&&-immunoglobulin production involved in immunoglobulin mediated immune response-%%-GO:0006955-&&-immune response-%%-GO:0019886-&&-antigen processing and presentation of exogenous peptide antigen via MHC class II-%%-GO:0050852-&&-T cell receptor signaling pathway-%%-GO:0002455-&&-humoral immune response mediated by circulati…	G:9606:HLA-DQB1	HLA-DQB1	TRUE	KEGG-&-1&-hsa04612-&&-Antigen processing and presentation-%%-hsa05416-&&-Viral myocarditis-%%-hsa05168-&&-Herpes simplex infection-%%-hsa04514-&&-Cell adhesion molecules (CAMs)-%%-hsa05310-&&-Asthma-%%-hsa05150-&&-Staphylococcus aureus infection-%%-hsa04940-&&-Type I diabetes mellitus-%%-hsa05323-&&-Rheumatoid arthritis-%%-hsa05322-&&-Systemic lupus erythematosus-%%-hsa05320-&&-Autoimmune thyroid…	HLA-DQB1	Homo sapiens (Human)-&&-9606	Gene Symbol-&-1&-HLA-DQB1		0.309487	0.5	4	5		FALSE		HLA-DQB1	HLA-DQB1	38.5		0	4	0	0.628141	FALSE	0	HLA-DQB1	380		0.271127
596695	taxon:9606	2.86654		7.298e-05	180295	1902	major histocompatibility complex, class II, DQ alpha 2	gene	biological_process-&-1&-GO:0031295-&&-T cell costimulation-%%-GO:0006955-&&-immune response-%%-GO:0019886-&&-antigen processing and presentation of exogenous peptide antigen via MHC class II-%%-GO:0050852-&&-T cell receptor signaling pathway-%%-GO:0060333-&&-interferon-gamma-mediated signaling pathway|cellular_component-&-1&-GO:0000139-&&-Golgi membrane-%%-GO:0012507-&&-ER to Golgi transport vesi…	G:9606:HLA-DQA2		FALSE	KEGG-&-1&-hsa05416-&&-Viral myocarditis-%%-hsa04612-&&-Antigen processing and presentation-%%-hsa05168-&&-Herpes simplex infection-%%-hsa04514-&&-Cell adhesion molecules (CAMs)-%%-hsa05150-&&-Staphylococcus aureus infection-%%-hsa05310-&&-Asthma-%%-hsa05322-&&-Systemic lupus erythematosus-%%-hsa04940-&&-Type I diabetes mellitus-%%-hsa05323-&&-Rheumatoid arthritis-%%-hsa05320-&&-Autoimmune thyroid…	HLA-DQA2	Homo sapiens (Human)-&&-9606	Gene Symbol-&-1&-HLA-DQA2		0.348853	0.0217391	24	4		FALSE		HLA-DQA2	HLA-DQA2	63.0833		0	24	0	0.68891	FALSE	0	HLA-DQA2	108146		0.0542644
596696	taxon:9606	2.86244		0.00015231	180299	1902	major histocompatibility complex, class II, DP alpha 1	gene	biological_process-&-1&-GO:0071346-&&-cellular response to interferon-gamma-%%-GO:0031295-&&-T cell costimulation-%%-GO:0006955-&&-immune response-%%-GO:0019886-&&-antigen processing and presentation of exogenous peptide antigen via MHC class II-%%-GO:0050852-&&-T cell receptor signaling pathway-%%-GO:0032729-&&-positive regulation of interferon-gamma production-%%-GO:0050870-&&-positive regulati…	G:9606:HLA-DPA1	HLA-DPA1	TRUE	KEGG-&-1&-hsa04612-&&-Antigen processing and presentation-%%-hsa05416-&&-Viral myocarditis-%%-hsa05168-&&-Herpes simplex infection-%%-hsa04514-&&-Cell adhesion molecules (CAMs)-%%-hsa05150-&&-Staphylococcus aureus infection-%%-hsa05310-&&-Asthma-%%-hsa04940-&&-Type I diabetes mellitus-%%-hsa05323-&&-Rheumatoid arthritis-%%-hsa05322-&&-Systemic lupus erythematosus-%%-hsa05320-&&-Autoimmune thyroid…	HLA-DPA1	Homo sapiens (Human)-&&-9606	Gene Symbol-&-1&-HLA-DPA1		0.349353	0.0116144	42	4		FALSE		HLA-DPA1	HLA-DPA1	37.5238		0	42	0	0.689594	FALSE	0	HLA-DPA1	275924		0.0328554
596697	taxon:9606	2.84949		6.23e-06	180303	1902	major histocompatibility complex, class II, DM beta	gene	biological_process-&-1&-GO:0042102-&&-positive regulation of T cell proliferation-%%-GO:0019886-&&-antigen processing and presentation of exogenous peptide antigen via MHC class II-%%-GO:2001190-&&-positive regulation of T cell activation via T cell receptor contact with antigen bound to MHC molecule on antigen presenting cell-%%-GO:0002399-&&-MHC class II protein complex assembly-%%-GO:0002503-&…	G:9606:HLA-DMB		FALSE	KEGG-&-1&-hsa05416-&&-Viral myocarditis-%%-hsa04612-&&-Antigen processing and presentation-%%-hsa05168-&&-Herpes simplex infection-%%-hsa04514-&&-Cell adhesion molecules (CAMs)-%%-hsa05150-&&-Staphylococcus aureus infection-%%-hsa05310-&&-Asthma-%%-hsa05323-&&-Rheumatoid arthritis-%%-hsa04940-&&-Type I diabetes mellitus-%%-hsa05322-&&-Systemic lupus erythematosus-%%-hsa05320-&&-Autoimmune thyroid…	HLA-DMB	Homo sapiens (Human)-&&-9606	Gene Symbol-&-1&-HLA-DMB		0.35094	0.190476	7	4		FALSE		HLA-DMB	HLA-DMB	219.143		0	7	0	0.691752	FALSE	0	HLA-DMB	10620		0.15701
596698	taxon:9606	2.92551		4.6e-07	163919	1902	ng finger protein 187	gene	biological_process-&-1&-GO:0070936-&&-protein K48-linked ubiquitination-%%-GO:0043161-&&-proteasome-mediated ubiquitin-dependent protein catabolic process-%%-GO:0008284-&&-positive regulation of cell proliferation-%%-GO:0045893-&&-positive regulation of transcription, DNA-templated-%%-GO:0051865-&&-protein autoubiquitination|cellular_component-&-1&-GO:0005634-&&-nucleus-%%-GO:0005737-&&-cytoplasm…	G:9606:RNF187		FALSE		RNF187	Homo sapiens (Human)-&&-9606	Gene Symbol-&-1&-RNF187		0.34182	0.133333	8	4		FALSE		RNF187	RNF187	194.833		0	7	0	0.679081	FALSE	1	RNF187	1702		0.211692
596699	taxon:9606	2.9559		2.35e-06	163917	1902	pyrin and HIN domain family member 1	gene	biological_process-&-1&-GO:0007049-&&-cell cycle|cellular_component-&-1&-GO:0016607-&&-nuclear speck	G:9606:PYHIN1		FALSE		PYHIN1	Homo sapiens (Human)-&&-9606	Gene Symbol-&-1&-PYHIN1		0.338307	0	7	5		FALSE		PYHIN1	PYHIN1	113.571		0	7	0	0.674017	FALSE	0	PYHIN1	4216		0.155271
596700	taxon:9606	2.32846	2568.04	0.00174485	180306	1902	complex, class I, B	gene	biological_process-&-1&-GO:0002480-&&-antigen processing and presentation of exogenous peptide antigen via MHC class I, TAP-independent-%%-GO:0002474-&&-antigen processing and presentation of peptide antigen via MHC class I-%%-GO:0060337-&&-type I interferon signaling pathway-%%-GO:0050776-&&-regulation of immune response-%%-GO:0016032-&&-viral process-%%-GO:0002479-&&-antigen processing and pres…	G:9606:HLA-B	HLA-B	TRUE	KEGG-&-1&-hsa05416-&&-Viral myocarditis-%%-hsa04612-&&-Antigen processing and presentation-%%-hsa05168-&&-Herpes simplex infection-%%-hsa04514-&&-Cell adhesion molecules (CAMs)-%%-hsa05163-&&-Human cytomegalovirus infection-%%-hsa05170-&&-Human immunodeficiency virus 1 infection-%%-hsa04940-&&-Type I diabetes mellitus-%%-hsa05167-&&-Kaposi sarcoma-associated herpesvirus infection-%%-hsa05320-&&-A…	HLA-B	Homo sapiens (Human)-&&-9606	Gene Symbol-&-1&-HLA-B	0.518853	0.429468	0.0290762	288	4	0.0228871	FALSE	12.2154	HLA-B	HLA-B	87.6783	19.4119	0	287	0	0.77859	FALSE	1	HLA-B	3606378	Infinity	0.0177115
596701	taxon:9606	2.76667		0	163920	1902	chromosome 1 open reading frame 64	gene		G:9606:C1orf64		FALSE		C1orf64	Homo sapiens (Human)-&&-9606	Gene Symbol-&-1&-C1orf64		0.361446	0	1	4		FALSE		C1orf64	C1orf64	2132		0	1	0	0.705556	FALSE	0	C1orf64	0		0
596702	taxon:9606	2.56038	118.715	0.00029473	180305	1902	major histocompatibility complex, class I, C	gene	biological_process-&-1&-GO:0002480-&&-antigen processing and presentation of exogenous peptide antigen via MHC class I, TAP-independent-%%-GO:0002474-&&-antigen processing and presentation of peptide antigen via MHC class I-%%-GO:0060337-&&-type I interferon signaling pathway-%%-GO:0050776-&&-regulation of immune response-%%-GO:0016032-&&-viral process-%%-GO:0002479-&&-antigen processing and pres…	G:9606:HLA-C	HLA-C	TRUE	KEGG-&-1&-hsa05416-&&-Viral myocarditis-%%-hsa04612-&&-Antigen processing and presentation-%%-hsa05168-&&-Herpes simplex infection-%%-hsa04514-&&-Cell adhesion molecules (CAMs)-%%-hsa05170-&&-Human immunodeficiency virus 1 infection-%%-hsa05163-&&-Human cytomegalovirus infection-%%-hsa04940-&&-Type I diabetes mellitus-%%-hsa05167-&&-Kaposi sarcoma-associated herpesvirus infection-%%-hsa05320-&&-A…	HLA-C	Homo sapiens (Human)-&&-9606	Gene Symbol-&-1&-HLA-C	0.46844	0.390566	0.0590767	74	4	0.00705749	FALSE	7.90909	HLA-C	HLA-C	113.778	8.22173	0	73	0	0.739936	FALSE	1	HLA-C	457114	Infinity	0.0335037
596703	taxon:9606	2.54205		8.815e-05	180310	1902	hexokinase 2	gene	biological_process-&-1&-GO:0002931-&&-response to ischemia-%%-GO:0008637-&&-apoptotic mitochondrial changes-%%-GO:2000378-&&-negative regulation of reactive oxygen species metabolic process-%%-GO:0051156-&&-glucose 6-phosphate metabolic process-%%-GO:0001678-&&-cellular glucose homeostasis-%%-GO:0072655-&&-establishment of protein localization to mitochondrion-%%-GO:0072656-&&-maintenance of prot…	G:9606:HK2	HK2	TRUE	KEGG-&-1&-hsa04973-&&-Carbohydrate digestion and absorption-%%-hsa04930-&&-Type II diabetes mellitus-%%-hsa05230-&&-Central carbon metabolism in cancer-%%-hsa00052-&&-Galactose metabolism-%%-hsa01100-&&-Metabolic pathways-%%-hsa01200-&&-Carbon metabolism-%%-hsa00500-&&-Starch and sucrose metabolism-%%-hsa00010-&&-Glycolysis / Gluconeogenesis-%%-hsa00520-&&-Amino sugar and nucleotide sugar metabol…	HK2	Homo sapiens (Human)-&&-9606	Gene Symbol-&-1&-HK2		0.393383	0.0569106	42	4		FALSE		HK2	HK2	164.31		0	42	0	0.742991	FALSE	0	HK2	189124		0.0461586
596704	taxon:9606	2.37744		7.205e-05	180311	1902	hexokinase 1	gene	biological_process-&-1&-GO:0051156-&&-glucose 6-phosphate metabolic process-%%-GO:0001678-&&-cellular glucose homeostasis-%%-GO:0072655-&&-establishment of protein localization to mitochondrion-%%-GO:0072656-&&-maintenance of protein location in mitochondrion-%%-GO:0015758-&&-glucose transport-%%-GO:0006096-&&-glycolytic process-%%-GO:0061621-&&-canonical glycolysis-%%-GO:0046835-&&-carbohydrate …	G:9606:HK1		FALSE	KEGG-&-1&-hsa04973-&&-Carbohydrate digestion and absorption-%%-hsa04930-&&-Type II diabetes mellitus-%%-hsa05230-&&-Central carbon metabolism in cancer-%%-hsa01200-&&-Carbon metabolism-%%-hsa00052-&&-Galactose metabolism-%%-hsa01100-&&-Metabolic pathways-%%-hsa00500-&&-Starch and sucrose metabolism-%%-hsa00010-&&-Glycolysis / Gluconeogenesis-%%-hsa00520-&&-Amino sugar and nucleotide sugar metabol…	HK1	Homo sapiens (Human)-&&-9606	Gene Symbol-&-1&-HK1		0.420621	0.142643	37	4		FALSE		HK1	HK1	260.892		0	37	0	0.770427	FALSE	0	HK1	165128		0.0537921
596705	taxon:9606	3.03987		1e-07	163927	1902	cilia and flagella associated protein 57	gene		G:9606:CFAP57		FALSE		CFAP57	Homo sapiens (Human)-&&-9606	Gene Symbol-&-1&-CFAP57		0.328961	0	2	5		FALSE		CFAP57	CFAP57	239.5		0	2	0	0.660021	FALSE	0	CFAP57	604		0.510707
596706	taxon:9606	2.8459		9.44e-06	180308	1902	zinc finger and BTB domain containing 48	gene	biological_process-&-1&-GO:0006355-&&-regulation of transcription, DNA-templated-%%-GO:0010833-&&-telomere maintenance via telomere lengthening-%%-GO:0006351-&&-transcription, DNA-templated|cellular_component-&-1&-GO:0000781-&&-chromosome, telomeric region-%%-GO:0005829-&&-cytosol-%%-GO:0005654-&&-nucleoplasm|molecular_function-&-1&-GO:0003691-&&-double-stranded telomeric DNA binding-%%-GO:000370…	G:9606:ZBTB48		FALSE		ZBTB48	Homo sapiens (Human)-&&-9606	Gene Symbol-&-1&-ZBTB48		0.351383	0.0392157	20	4		FALSE		ZBTB48	ZBTB48	95.7778		0	19	0	0.69235	FALSE	1	ZBTB48	18102		0.0718362
596707	taxon:9606	2.88167		3.7e-06	163930	1902	PDLIM1 interacting kinase 1 like	gene	biological_process-&-1&-GO:0006468-&&-protein phosphorylation|cellular_component-&-1&-GO:0005654-&&-nucleoplasm|molecular_function-&-1&-GO:0004674-&&-protein serine/threonine kinase activity-%%-GO:0005524-&&-ATP binding-%%-GO:0005515-&&-protein binding	G:9606:PDIK1L		FALSE		PDIK1L	Homo sapiens (Human)-&&-9606	Gene Symbol-&-1&-PDIK1L		0.347021	0.3	5	4		FALSE		PDIK1L	PDIK1L	365		0	5	0	0.686389	FALSE	0	PDIK1L	13950		0.33728
596708	taxon:9606	2.61154		0.00017457	180314	1902	histidine triad nucleotide binding protein 1	gene	biological_process-&-1&-GO:0006355-&&-regulation of transcription, DNA-templated-%%-GO:0050850-&&-positive regulation of calcium-mediated signaling-%%-GO:0009154-&&-purine ribonucleotide catabolic process-%%-GO:0007165-&&-signal transduction-%%-GO:0072332-&&-intrinsic apoptotic signaling pathway by p53 class mediator-%%-GO:0006351-&&-transcription, DNA-templated|cellular_component-&-1&-GO:0005634…	G:9606:HINT1		FALSE		HINT1	Homo sapiens (Human)-&&-9606	Gene Symbol-&-1&-HINT1		0.382916	0.130817	70	4		FALSE		HINT1	HINT1	106.676		0	69	0	0.73141	FALSE	1	HINT1	358572		0.0354594
596709	taxon:9606	2.46462	257.156	0.00022604	180315	1902	ubiquitin conjugating enzyme E2 K	gene	biological_process-&-1&-GO:0010994-&&-free ubiquitin chain polymerization-%%-GO:0060340-&&-positive regulation of type I interferon-mediated signaling pathway-%%-GO:0070936-&&-protein K48-linked ubiquitination-%%-GO:0016567-&&-protein ubiquitination-%%-GO:0035458-&&-cellular response to interferon-beta-%%-GO:0010800-&&-positive regulation of peptidyl-threonine phosphorylation-%%-GO:0032434-&&-reg…	G:9606:UBE2K		FALSE	KEGG-&-1&-hsa04120-&&-Ubiquitin mediated proteolysis	UBE2K	Homo sapiens (Human)-&&-9606	Gene Symbol-&-1&-UBE2K	0.488174	0.405743	0.094851	84	4	0.00858777	FALSE	10.7442	UBE2K	UBE2K	142.854	11.0211	0	83	0	0.755897	FALSE	1	UBE2K	529298	Infinity	0.0345637
596710	taxon:9606	3.03936		5.41e-06	163929	1902	BCL2 interacting protein like	gene	biological_process-&-1&-GO:0006915-&&-apoptotic process-%%-GO:0008285-&&-negative regulation of cell proliferation-%%-GO:0040009-&&-regulation of growth rate|cellular_component-&-1&-GO:0005634-&&-nucleus-%%-GO:0005829-&&-cytosol|molecular_function-&-1&-GO:0005515-&&-protein binding-%%-GO:0042802-&&-identical protein binding	G:9606:BNIPL		FALSE		BNIPL	Homo sapiens (Human)-&&-9606	Gene Symbol-&-1&-BNIPL		0.329017	0.0909091	14	5		FALSE		BNIPL	BNIPL	69.8333		0	13	0	0.660107	FALSE	1	BNIPL	7784		0.116276
596711	taxon:9606	2.60154		0.0001088	180313	1902	human immunodeficiency virus type I enhancer binding protein 1	gene	biological_process-&-1&-GO:0007165-&&-signal transduction-%%-GO:0007275-&&-multicellular organism development-%%-GO:0000122-&&-negative regulation of transcription from RNA polymerase II promoter-%%-GO:0006366-&&-transcription from RNA polymerase II promoter|cellular_component-&-1&-GO:0005634-&&-nucleus-%%-GO:0005654-&&-nucleoplasm-%%-GO:0016604-&&-nuclear body-%%-GO:0005739-&&-mitochondrion|mole…	G:9606:HIVEP1		FALSE		HIVEP1	Homo sapiens (Human)-&&-9606	Gene Symbol-&-1&-HIVEP1		0.384388	0.0464576	42	4		FALSE		HIVEP1	HIVEP1	131.286		0	42	0	0.733077	FALSE	0	HIVEP1	174716		0.0425049
596712	taxon:9606	2.72654		9.29e-06	180318	1902	HIC ZBTB transcriptional repressor 1	gene	biological_process-&-1&-GO:0030178-&&-negative regulation of Wnt signaling pathway-%%-GO:0000122-&&-negative regulation of transcription from RNA polymerase II promoter-%%-GO:0006355-&&-regulation of transcription, DNA-templated-%%-GO:0008630-&&-intrinsic apoptotic signaling pathway in response to DNA damage-%%-GO:0016055-&&-Wnt signaling pathway-%%-GO:0043517-&&-positive regulation of DNA damage…	G:9606:HIC1		FALSE		HIC1	Homo sapiens (Human)-&&-9606	Gene Symbol-&-1&-HIC1		0.366765	0.264615	28	4		FALSE		HIC1	HIC1	171.538		0	27	0	0.712244	FALSE	1	HIC1	24966		0.0785432
596713	taxon:9606	2.91256		7.38e-06	180319	1902	hematopoietically expressed homeobox	gene	biological_process-&-1&-GO:0001570-&&-vasculogenesis-%%-GO:0007492-&&-endoderm development-%%-GO:0061010-&&-gall bladder development-%%-GO:0045892-&&-negative regulation of transcription, DNA-templated-%%-GO:0030878-&&-thyroid gland development-%%-GO:0035050-&&-embryonic heart tube development-%%-GO:0048853-&&-forebrain morphogenesis-%%-GO:0090009-&&-primitive streak formation-%%-GO:0030154-&&-ce…	G:9606:HHEX		FALSE	KEGG-&-1&-hsa05202-&&-Transcriptional misregulation in cancer-%%-hsa04950-&&-Maturity onset diabetes of the young	HHEX	Homo sapiens (Human)-&&-9606	Gene Symbol-&-1&-HHEX		0.34334	0.166667	12	4		FALSE		HHEX	HHEX	102.667		0	12	0	0.681239	FALSE	0	HHEX	12306		0.111081
596714	taxon:9606	2.62256		3.353e-05	180316	1902	huntingtin interacting protein 1	gene	biological_process-&-1&-GO:0006919-&&-activation of cysteine-type endopeptidase activity involved in apoptotic process-%%-GO:0042981-&&-regulation of apoptotic process-%%-GO:2000588-&&-positive regulation of platelet-derived growth factor receptor-beta signaling pathway-%%-GO:0061024-&&-membrane organization-%%-GO:0048268-&&-clathrin coat assembly-%%-GO:0099637-&&-neurotransmitter receptor transp…	G:9606:HIP1		FALSE	KEGG-&-1&-hsa05016-&&-Huntington disease	HIP1	Homo sapiens (Human)-&&-9606	Gene Symbol-&-1&-HIP1		0.381306	0.141129	34	4		FALSE		HIP1	HIP1	164.625		0	33	0	0.729573	FALSE	1	HIP1	81050		0.0551643
596715	taxon:9606	2.27141	1220.54	0.00202943	180317	1902	hypoxia inducible factor 1 alpha subunit	gene	biological_process-&-1&-GO:0032909-&&-regulation of transforming growth factor beta2 production-%%-GO:0001837-&&-epithelial to mesenchymal transition-%%-GO:0007165-&&-signal transduction-%%-GO:0014850-&&-response to muscle activity-%%-GO:0045893-&&-positive regulation of transcription, DNA-templated-%%-GO:0010575-&&-positive regulation of vascular endothelial growth factor production-%%-GO:000175…	G:9606:HIF1A	HIF1A	TRUE	KEGG-&-1&-hsa04137-&&-Mitophagy - animal-%%-hsa05230-&&-Central carbon metabolism in cancer-%%-hsa05211-&&-Renal cell carcinoma-%%-hsa05231-&&-Choline metabolism in cancer-%%-hsa05167-&&-Kaposi sarcoma-associated herpesvirus infection-%%-hsa05205-&&-Proteoglycans in cancer-%%-hsa04066-&&-HIF-1 signaling pathway-%%-hsa04659-&&-Th17 cell differentiation-%%-hsa05200-&&-Pathways in cancer-%%-hsa04919…	HIF1A	Homo sapiens (Human)-&&-9606	Gene Symbol-&-1&-HIF1A	0.512016	0.440255	0.0845913	172	4	0.020766	FALSE	19.9175	HIF1A	HIF1A	149.616	23.4449	0	172	0	0.788098	FALSE	0	HIF1A	3725428	Infinity	0.0271392
596716	taxon:9606	2.64513		4.698e-05	163933	1902	exocyst complex component 8	gene	biological_process-&-1&-GO:0016241-&&-regulation of macroautophagy-%%-GO:0051601-&&-exocyst localization-%%-GO:0007032-&&-endosome organization-%%-GO:0015031-&&-protein transport-%%-GO:0022617-&&-extracellular matrix disassembly-%%-GO:0001927-&&-exocyst assembly|cellular_component-&-1&-GO:0005829-&&-cytosol-%%-GO:0030426-&&-growth cone-%%-GO:0005886-&&-plasma membrane-%%-GO:0000145-&&-exocyst-%%-…	G:9606:EXOC8		FALSE		EXOC8	Homo sapiens (Human)-&&-9606	Gene Symbol-&-1&-EXOC8		0.378054	0.163218	30	4		FALSE		EXOC8	EXOC8	136.433		0	30	0	0.725812	FALSE	0	EXOC8	76188		0.0485799
596717	taxon:9606	3.04231		1.82e-06	163938	1902	interleukin 23 receptor	gene	biological_process-&-1&-GO:0050829-&&-defense response to Gram-negative bacterium-%%-GO:0042523-&&-positive regulation of tyrosine phosphorylation of Stat5 protein-%%-GO:0002827-&&-positive regulation of T-helper 1 type immune response-%%-GO:0032725-&&-positive regulation of granulocyte macrophage colony-stimulating factor production-%%-GO:0032729-&&-positive regulation of interferon-gamma produc…	G:9606:IL23R		FALSE	KEGG-&-1&-hsa04060-&&-Cytokine-cytokine receptor interaction-%%-hsa04630-&&-JAK-STAT signaling pathway-%%-hsa05321-&&-Inflammatory bowel disease (IBD)-%%-hsa04659-&&-Th17 cell differentiation-%%-hsa05200-&&-Pathways in cancer	IL23R	Homo sapiens (Human)-&&-9606	Gene Symbol-&-1&-IL23R		0.328698	0.166667	4	5		FALSE		IL23R	IL23R	103.5		0	4	0	0.659615	FALSE	0	IL23R	1880		0.280654
596718	taxon:9606	2.83308		2.075e-05	180322	1902	hepatocyte growth factor	gene	biological_process-&-1&-GO:0045766-&&-positive regulation of angiogenesis-%%-GO:0060326-&&-cell chemotaxis-%%-GO:0090201-&&-negative regulation of release of cytochrome c from mitochondria-%%-GO:0060665-&&-regulation of branching involved in salivary gland morphogenesis by mesenchymal-epithelial signaling-%%-GO:0032715-&&-negative regulation of interleukin-6 production-%%-GO:0001837-&&-epithelial…	G:9606:HGF		FALSE	KEGG-&-1&-hsa05218-&&-Melanoma-%%-hsa04510-&&-Focal adhesion-%%-hsa05225-&&-Hepatocellular carcinoma-%%-hsa01521-&&-EGFR tyrosine kinase inhibitor resistance-%%-hsa05205-&&-Proteoglycans in cancer-%%-hsa04014-&&-Ras signaling pathway-%%-hsa05200-&&-Pathways in cancer-%%-hsa04151-&&-PI3K-Akt signaling pathway-%%-hsa05144-&&-Malaria-%%-hsa05211-&&-Renal cell carcinoma-%%-hsa04015-&&-Rap1 signaling …	HGF	Homo sapiens (Human)-&&-9606	Gene Symbol-&-1&-HGF		0.352973	0.0384615	15	4		FALSE		HGF	HGF	126.692		0	14	0	0.694487	FALSE	1	HGF	28030		0.0897345
596719	taxon:9606	2.75859		8.202e-05	180320	1902	neuregulin 1	gene	biological_process-&-1&-GO:0045892-&&-negative regulation of transcription, DNA-templated-%%-GO:0048663-&&-neuron fate commitment-%%-GO:0007399-&&-nervous system development-%%-GO:0021842-&&-chemorepulsion involved in interneuron migration from the subpallium to the cortex-%%-GO:0045944-&&-positive regulation of transcription from RNA polymerase II promoter-%%-GO:0043496-&&-regulation of protein …	G:9606:NRG1		FALSE	KEGG-&-1&-hsa04012-&&-ErbB signaling pathway-%%-hsa01521-&&-EGFR tyrosine kinase inhibitor resistance	NRG1	Homo sapiens (Human)-&&-9606	Gene Symbol-&-1&-NRG1		0.362504	0.0418719	29	4		FALSE		NRG1	NRG1	93.3793		0	29	0	0.706902	FALSE	0	NRG1	109772		0.0478355
596720	taxon:9606	2.93333		1.33e-06	180326	1902	hemochromatosis	gene	biological_process-&-1&-GO:2000008-&&-regulation of protein localization to cell surface-%%-GO:0055072-&&-iron ion homeostasis-%%-GO:0006953-&&-acute-phase response-%%-GO:0097421-&&-liver regeneration-%%-GO:0060586-&&-multicellular organismal iron ion homeostasis-%%-GO:0048260-&&-positive regulation of receptor-mediated endocytosis-%%-GO:2000059-&&-negative regulation of protein ubiquitination in…	G:9606:HFE		FALSE		HFE	Homo sapiens (Human)-&&-9606	Gene Symbol-&-1&-HFE		0.340909	0.2	8	4		FALSE		HFE	HFE	153.833		0	7	0	0.677778	FALSE	1	HFE	3302		0.196505
596721	taxon:9606	2.80795		0.00010514	180327	1902	complement factor H	gene	biological_process-&-1&-GO:0006957-&&-complement activation, alternative pathway-%%-GO:0006956-&&-complement activation-%%-GO:0030449-&&-regulation of complement activation|cellular_component-&-1&-GO:0005576-&&-extracellular region-%%-GO:0070062-&&-extracellular exosome-%%-GO:0005615-&&-extracellular space-%%-GO:0072562-&&-blood microparticle|molecular_function-&-1&-GO:0043395-&&-heparan sulfate …	G:9606:CFH		FALSE	KEGG-&-1&-hsa05150-&&-Staphylococcus aureus infection-%%-hsa04610-&&-Complement and coagulation cascades	CFH	Homo sapiens (Human)-&&-9606	Gene Symbol-&-1&-CFH		0.356132	0.0952381	15	4		FALSE		CFH	CFH	132.867		0	15	0	0.698675	FALSE	0	CFH	174862		0.0840102
596722	taxon:9606	2.76667		0	180324	1902	complement factor H related 2	gene	cellular_component-&-1&-GO:0005576-&&-extracellular region	G:9606:CFHR2		FALSE		CFHR2	Homo sapiens (Human)-&&-9606	Gene Symbol-&-1&-CFHR2		0.361446	0	1	4		FALSE		CFHR2	CFHR2	2132		0	1	0	0.705556	FALSE	0	CFHR2	0		0
596723	taxon:9606	2.36295		7.258e-05	180331	1902	helicase, lymphoid-specific	gene	biological_process-&-1&-GO:0031508-&&-pericentric heterochromatin assembly-%%-GO:0007275-&&-multicellular organism development-%%-GO:0046651-&&-lymphocyte proliferation-%%-GO:0051301-&&-cell division-%%-GO:0007067-&&-mitotic nuclear division-%%-GO:0006346-&&-methylation-dependent chromatin silencing-%%-GO:0010216-&&-maintenance of DNA methylation-%%-GO:0006351-&&-transcription, DNA-templated|cell…	G:9606:HELLS		FALSE		HELLS	Homo sapiens (Human)-&&-9606	Gene Symbol-&-1&-HELLS		0.4232	0.114114	37	4		FALSE		HELLS	HELLS	300.378		0	37	0	0.772842	FALSE	0	HELLS	240878		0.0605262
596724	taxon:9606	2.76141		1.963e-05	180328	1902	hexosaminidase subunit beta	gene	biological_process-&-1&-GO:0007040-&&-lysosome organization-%%-GO:0009313-&&-oligosaccharide catabolic process-%%-GO:0043615-&&-astrocyte cell migration-%%-GO:0006874-&&-cellular calcium ion homeostasis-%%-GO:0008049-&&-male courtship behavior-%%-GO:0008360-&&-regulation of cell shape-%%-GO:0008654-&&-phospholipid biosynthetic process-%%-GO:0050885-&&-neuromuscular process controlling balance-%%-…	G:9606:HEXB		FALSE	KEGG-&-1&-hsa00531-&&-Glycosaminoglycan degradation-%%-hsa00520-&&-Amino sugar and nucleotide sugar metabolism-%%-hsa00604-&&-Glycosphingolipid biosynthesis - ganglio series-%%-hsa01100-&&-Metabolic pathways-%%-hsa04142-&&-Lysosome-%%-hsa00603-&&-Glycosphingolipid biosynthesis - globo and isoglobo series-%%-hsa00511-&&-Other glycan degradation	HEXB	Homo sapiens (Human)-&&-9606	Gene Symbol-&-1&-HEXB		0.362134	0.110526	22	4		FALSE		HEXB	HEXB	135.5		0	21	0	0.706432	FALSE	1	HEXB	32424		0.0689796
596725	taxon:9606	2.71333		2.975e-05	180329	1902	hexosaminidase subunit alpha	gene	biological_process-&-1&-GO:0030207-&&-chondroitin sulfate catabolic process-%%-GO:0030214-&&-hyaluronan catabolic process-%%-GO:0006687-&&-glycosphingolipid metabolic process-%%-GO:0042340-&&-keratan sulfate catabolic process-%%-GO:0005975-&&-carbohydrate metabolic process-%%-GO:0006024-&&-glycosaminoglycan biosynthetic process|cellular_component-&-1&-GO:0042582-&&-azurophil granule-%%-GO:0070062…	G:9606:HEXA		FALSE	KEGG-&-1&-hsa00520-&&-Amino sugar and nucleotide sugar metabolism-%%-hsa00531-&&-Glycosaminoglycan degradation-%%-hsa00604-&&-Glycosphingolipid biosynthesis - ganglio series-%%-hsa01100-&&-Metabolic pathways-%%-hsa04142-&&-Lysosome-%%-hsa00603-&&-Glycosphingolipid biosynthesis - globo and isoglobo series-%%-hsa00511-&&-Other glycan degradation	HEXA	Homo sapiens (Human)-&&-9606	Gene Symbol-&-1&-HEXA		0.36855	0.105747	30	4		FALSE		HEXA	HEXA	127.567		0	30	0	0.714444	FALSE	0	HEXA	61792		0.0560933
596726	taxon:9606	2.25769	3376.19	0.00151208	180335	1902	histone deacetylase 2	gene	biological_process-&-1&-GO:0071300-&&-cellular response to retinoic acid-%%-GO:2000757-&&-negative regulation of peptidyl-lysine acetylation-%%-GO:0031000-&&-response to caffeine-%%-GO:0043433-&&-negative regulation of sequence-specific DNA binding transcription factor activity-%%-GO:0032967-&&-positive regulation of collagen biosynthetic process-%%-GO:0061198-&&-fungiform papilla formation-%%-GO…	G:9606:HDAC2		FALSE	KEGG-&-1&-hsa05202-&&-Transcriptional misregulation in cancer-%%-hsa05016-&&-Huntington disease-%%-hsa04110-&&-Cell cycle-%%-hsa05034-&&-Alcoholism-%%-hsa05220-&&-Chronic myeloid leukemia-%%-hsa05203-&&-Viral carcinogenesis-%%-hsa05169-&&-Epstein-Barr virus infection-%%-hsa04330-&&-Notch signaling pathway-%%-hsa04213-&&-Longevity regulating pathway - multiple species-%%-hsa05200-&&-Pathways in ca…	HDAC2	Homo sapiens (Human)-&&-9606	Gene Symbol-&-1&-HDAC2	0.53159	0.44293	0.0980323	294	4	0.0389708	FALSE	36.314	HDAC2	HDAC2	140.675	59.9461	0	293	0	0.790385	FALSE	1	HDAC2	4342938	Infinity	0.0255262
596727	taxon:9606	2.45641		0.00010942	180332	1902	high density lipoprotein binding protein	gene	biological_process-&-1&-GO:0008203-&&-cholesterol metabolic process-%%-GO:0042157-&&-lipoprotein metabolic process-%%-GO:0006869-&&-lipid transport|cellular_component-&-1&-GO:0005886-&&-plasma membrane-%%-GO:0005829-&&-cytosol-%%-GO:0005634-&&-nucleus-%%-GO:0034364-&&-high-density lipoprotein particle|molecular_function-&-1&-GO:0003723-&&-RNA binding-%%-GO:0005515-&&-protein binding-%%-GO:0045296…	G:9606:HDLBP		FALSE		HDLBP	Homo sapiens (Human)-&&-9606	Gene Symbol-&-1&-HDLBP		0.407098	0.100565	60	4		FALSE		HDLBP	HDLBP	200.583		0	60	0	0.757265	FALSE	0	HDLBP	292260		0.0475834
596728	taxon:9606	2.51513	822.515	0.00020708	163949	1902	ring finger and CCCH-type domains 1	gene	biological_process-&-1&-GO:0050856-&&-regulation of T cell receptor signaling pathway-%%-GO:0033962-&&-cytoplasmic mRNA processing body assembly-%%-GO:0046007-&&-negative regulation of activated T cell proliferation-%%-GO:0030889-&&-negative regulation of B cell proliferation-%%-GO:0048535-&&-lymph node development-%%-GO:1901224-&&-positive regulation of NIK/NF-kappaB signaling-%%-GO:0043488-&&-r…	G:9606:RC3H1		FALSE		RC3H1	Homo sapiens (Human)-&&-9606	Gene Symbol-&-1&-RC3H1	0.501138	0.397594	0.0947712	153	4	0.0283057	FALSE	19.4314	RC3H1	RC3H1	119.17	20.7894	0	153	0	0.747479	FALSE	0	RC3H1	566166	Infinity	0.0325707
596729	taxon:9606	2.27564	1130.12	0.00044616	180333	1902	hepatoma derived growth factor	gene	biological_process-&-1&-GO:0007165-&&-signal transduction-%%-GO:0008283-&&-cell proliferation-%%-GO:0036498-&&-IRE1-mediated unfolded protein response-%%-GO:0000122-&&-negative regulation of transcription from RNA polymerase II promoter-%%-GO:0006351-&&-transcription, DNA-templated|cellular_component-&-1&-GO:0005737-&&-cytoplasm-%%-GO:0005615-&&-extracellular space-%%-GO:0005654-&&-nucleoplasm-%%…	G:9606:HDGF		FALSE		HDGF	Homo sapiens (Human)-&&-9606	Gene Symbol-&-1&-HDGF	0.514408	0.439437	0.103994	188	4	0.0341812	FALSE	24.0556	HDGF	HDGF	161.989	28.9739	0	188	0	0.787393	FALSE	0	HDGF	1442120	Infinity	0.0294882
596730	taxon:9606	2.17423	6558.93	0.0050355	180336	1902	histone deacetylase 1	gene	biological_process-&-1&-GO:0006346-&&-methylation-dependent chromatin silencing-%%-GO:0045893-&&-positive regulation of transcription, DNA-templated-%%-GO:0006476-&&-protein deacetylation-%%-GO:0061198-&&-fungiform papilla formation-%%-GO:1901796-&&-regulation of signal transduction by p53 class mediator-%%-GO:0045892-&&-negative regulation of transcription, DNA-templated-%%-GO:0090090-&&-negativ…	G:9606:HDAC1	HDAC1	TRUE	KEGG-&-1&-hsa05202-&&-Transcriptional misregulation in cancer-%%-hsa05206-&&-MicroRNAs in cancer-%%-hsa04110-&&-Cell cycle-%%-hsa05200-&&-Pathways in cancer-%%-hsa05165-&&-Human papillomavirus infection-%%-hsa04919-&&-Thyroid hormone signaling pathway-%%-hsa05016-&&-Huntington disease-%%-hsa05031-&&-Amphetamine addiction-%%-hsa05034-&&-Alcoholism-%%-hsa05220-&&-Chronic myeloid leukemia-%%-hsa0520…	HDAC1	Homo sapiens (Human)-&&-9606	Gene Symbol-&-1&-HDAC1	0.544069	0.459933	0.0626775	472	4	0.0441933	FALSE	39.3559	HDAC1	HDAC1	107.951	85.607	0	471	0	0.804295	FALSE	1	HDAC1	11019774	Infinity	0.0180771
596731	taxon:9606	2.24679	1909.05	0.00222171	180337	1902	huntingtin	gene	biological_process-&-1&-GO:0006890-&&-retrograde vesicle-mediated transport, Golgi to ER-%%-GO:0006915-&&-apoptotic process-%%-GO:0031587-&&-positive regulation of inositol 1,4,5-trisphosphate-sensitive calcium-release channel activity-%%-GO:0000132-&&-establishment of mitotic spindle orientation-%%-GO:1905337-&&-positive regulation of aggrephagy-%%-GO:0048513-&&-animal organ development-%%-GO:00…	G:9606:HTT	HTT	TRUE	KEGG-&-1&-hsa05016-&&-Huntington disease	HTT	Homo sapiens (Human)-&&-9606	Gene Symbol-&-1&-HTT	0.515814	0.445078	0.0400527	233	4	0.0209712	FALSE	15.981	HTT	HTT	114.55	20.4198	0	232	0	0.792201	FALSE	1	HTT	4240008	Infinity	0.0203325
596732	taxon:9606	2.70064		5.58e-06	163953	1902	MOB kinase activator 3C	gene	molecular_function-&-1&-GO:0046872-&&-metal ion binding-%%-GO:0005515-&&-protein binding	G:9606:MOB3C		FALSE		MOB3C	Homo sapiens (Human)-&&-9606	Gene Symbol-&-1&-MOB3C		0.370282	0.142857	8	4		FALSE		MOB3C	MOB3C	348		0	8	0	0.71656	FALSE	0	MOB3C	18680		0.138662
596733	taxon:9606	2.73564		2.632e-05	180342	1902	hematopoietic cell-specific Lyn substrate 1	gene	biological_process-&-1&-GO:0035556-&&-intracellular signal transduction-%%-GO:0042993-&&-positive regulation of transcription factor import into nucleus-%%-GO:0030041-&&-actin filament polymerization-%%-GO:0071345-&&-cellular response to cytokine stimulus-%%-GO:0000122-&&-negative regulation of transcription from RNA polymerase II promoter-%%-GO:0006355-&&-regulation of transcription, DNA-templat…	G:9606:HCLS1		FALSE	KEGG-&-1&-hsa05100-&&-Bacterial invasion of epithelial cells-%%-hsa05205-&&-Proteoglycans in cancer-%%-hsa05131-&&-Shigellosis-%%-hsa04530-&&-Tight junction-%%-hsa05130-&&-Pathogenic Escherichia coli infection	HCLS1	Homo sapiens (Human)-&&-9606	Gene Symbol-&-1&-HCLS1		0.365545	0.0797101	24	4		FALSE		HCLS1	HCLS1	133.542		0	24	0	0.710727	FALSE	0	HCLS1	48698		0.0632116
596734	taxon:9606	2.38987	438.12	0.00033918	180346	1902	host cell factor C1	gene	biological_process-&-1&-GO:0006366-&&-transcription from RNA polymerase II promoter-%%-GO:0043982-&&-histone H4-K8 acetylation-%%-GO:0043981-&&-histone H4-K5 acetylation-%%-GO:0007005-&&-mitochondrion organization-%%-GO:0010628-&&-positive regulation of gene expression-%%-GO:0050821-&&-protein stabilization-%%-GO:0006355-&&-regulation of transcription, DNA-templated-%%-GO:0045944-&&-positive regu…	G:9606:HCFC1		FALSE	KEGG-&-1&-hsa05168-&&-Herpes simplex infection	HCFC1	Homo sapiens (Human)-&&-9606	Gene Symbol-&-1&-HCFC1	0.496803	0.418432	0.0916013	97	4	0.0123626	FALSE	11.4082	HCFC1	HCFC1	166.316	12.2282	0	96	0	0.768355	FALSE	1	HCFC1	768580	Infinity	0.0355058
596735	taxon:9606	2.75321		2.535e-05	180347	1902	serpin family D member 1	gene	biological_process-&-1&-GO:0006935-&&-chemotaxis-%%-GO:0010951-&&-negative regulation of endopeptidase activity-%%-GO:0008218-&&-bioluminescence-%%-GO:0007596-&&-blood coagulation|cellular_component-&-1&-GO:0005576-&&-extracellular region-%%-GO:0070062-&&-extracellular exosome-%%-GO:0005615-&&-extracellular space|molecular_function-&-1&-GO:0004866-&&-endopeptidase inhibitor activity-%%-GO:0008201…	G:9606:SERPIND1		FALSE	KEGG-&-1&-hsa04610-&&-Complement and coagulation cascades	SERPIND1	Homo sapiens (Human)-&&-9606	Gene Symbol-&-1&-SERPIND1		0.363213	0	6	4		FALSE		SERPIND1	SERPIND1	558.5		0	5	0	0.707799	FALSE	1	SERPIND1	22212		0.253755
596736	taxon:9606	2.28821	881.602	0.00093545	180345	1902	HCK proto-oncogene, Src family tyrosine kinase	gene	biological_process-&-1&-GO:0007169-&&-transmembrane receptor protein tyrosine kinase signaling pathway-%%-GO:0038096-&&-Fc-gamma receptor signaling pathway involved in phagocytosis-%%-GO:0046777-&&-protein autophosphorylation-%%-GO:2000251-&&-positive regulation of actin cytoskeleton reorganization-%%-GO:0050690-&&-regulation of defense response to virus by virus-%%-GO:0030838-&&-positive regulat…	G:9606:HCK	HCK	TRUE	KEGG-&-1&-hsa04666-&&-Fc gamma R-mediated phagocytosis-%%-hsa04062-&&-Chemokine signaling pathway-%%-hsa05167-&&-Kaposi sarcoma-associated herpesvirus infection	HCK	Homo sapiens (Human)-&&-9606	Gene Symbol-&-1&-HCK	0.481765	0.437024	0.105241	99	4	0.00781624	FALSE	13.9434	HCK	HCK	140.897	15.8348	0	98	0	0.785299	FALSE	1	HCK	1620068	Infinity	0.0257892
596737	taxon:9606	2.55449		7.18e-05	180350	1902	hemoglobin subunit zeta	gene	biological_process-&-1&-GO:0015671-&&-oxygen transport-%%-GO:0000122-&&-negative regulation of transcription from RNA polymerase II promoter-%%-GO:0043249-&&-erythrocyte maturation|cellular_component-&-1&-GO:0005833-&&-hemoglobin complex-%%-GO:0070062-&&-extracellular exosome|molecular_function-&-1&-GO:0019825-&&-oxygen binding-%%-GO:0005344-&&-oxygen transporter activity-%%-GO:0005506-&&-iron io…	G:9606:HBZ		FALSE		HBZ	Homo sapiens (Human)-&&-9606	Gene Symbol-&-1&-HBZ		0.391468	0.133333	23	4		FALSE		HBZ	HBZ	273		0	22	0	0.740919	FALSE	1	HBZ	163418		0.078164
596738	taxon:9606	3.00821		3e-08	163966	1902	ankyrin repeat domain 35	gene		G:9606:ANKRD35		FALSE		ANKRD35	Homo sapiens (Human)-&&-9606	Gene Symbol-&-1&-ANKRD35		0.332424	0	2	5		FALSE		ANKRD35	ANKRD35	293.5		0	2	0	0.665299	FALSE	0	ANKRD35	198		0.513158
596739	taxon:9606	2.965		1.2e-07	180354	1902	hemoglobin subunit epsilon 1	gene	biological_process-&-1&-GO:0015671-&&-oxygen transport-%%-GO:0051291-&&-protein heterooligomerization-%%-GO:0014070-&&-response to organic cyclic compound-%%-GO:0007596-&&-blood coagulation|cellular_component-&-1&-GO:0005829-&&-cytosol-%%-GO:0005833-&&-hemoglobin complex-%%-GO:0072562-&&-blood microparticle|molecular_function-&-1&-GO:0019825-&&-oxygen binding-%%-GO:0005344-&&-oxygen transporter a…	G:9606:HBE1		FALSE		HBE1	Homo sapiens (Human)-&&-9606	Gene Symbol-&-1&-HBE1		0.337268	0.666667	6	5		FALSE		HBE1	HBE1	202.333		0	6	0	0.6725	FALSE	0	HBE1	490		0.274164
596740	taxon:9606	2.6159		6.134e-05	180355	1902	hemoglobin subunit delta	gene	biological_process-&-1&-GO:0015671-&&-oxygen transport-%%-GO:0007596-&&-blood coagulation|cellular_component-&-1&-GO:0005829-&&-cytosol-%%-GO:0005833-&&-hemoglobin complex-%%-GO:0072562-&&-blood microparticle|molecular_function-&-1&-GO:0019825-&&-oxygen binding-%%-GO:0005344-&&-oxygen transporter activity-%%-GO:0005506-&&-iron ion binding-%%-GO:0005515-&&-protein binding-%%-GO:0020037-&&-heme bin…	G:9606:HBD		FALSE		HBD	Homo sapiens (Human)-&&-9606	Gene Symbol-&-1&-HBD		0.382278	0.175824	16	4		FALSE		HBD	HBD	264.286		0	15	0	0.730684	FALSE	1	HBD	89882		0.0861242
596741	taxon:9606	2.6		1.888e-05	180352	1902	hemoglobin subunit gamma 2	gene	biological_process-&-1&-GO:0015671-&&-oxygen transport-%%-GO:0007596-&&-blood coagulation|cellular_component-&-1&-GO:0005829-&&-cytosol-%%-GO:0005833-&&-hemoglobin complex-%%-GO:0072562-&&-blood microparticle|molecular_function-&-1&-GO:0019825-&&-oxygen binding-%%-GO:0005344-&&-oxygen transporter activity-%%-GO:0005506-&&-iron ion binding-%%-GO:0020037-&&-heme binding	G:9606:HBG2		FALSE		HBG2	Homo sapiens (Human)-&&-9606	Gene Symbol-&-1&-HBG2		0.384615	0.30303	14	4		FALSE		HBG2	HBG2	377.083		0	13	0	0.733333	FALSE	1	HBG2	45520		0.11786
596742	taxon:9606	2.57872		1.053e-05	180353	1902	hemoglobin subunit gamma 1	gene	biological_process-&-1&-GO:0015671-&&-oxygen transport-%%-GO:0007596-&&-blood coagulation|cellular_component-&-1&-GO:0005829-&&-cytosol-%%-GO:0005833-&&-hemoglobin complex|molecular_function-&-1&-GO:0019825-&&-oxygen binding-%%-GO:0005344-&&-oxygen transporter activity-%%-GO:0005506-&&-iron ion binding-%%-GO:0020037-&&-heme binding	G:9606:HBG1		FALSE		HBG1	Homo sapiens (Human)-&&-9606	Gene Symbol-&-1&-HBG1		0.38779	0.181818	11	4		FALSE		HBG1	HBG1	441.091		0	11	0	0.73688	FALSE	0	HBG1	56048		0.131118
596743	taxon:9606	2.71756		8.548e-05	163974	1902	ubiquitin conjugating enzyme E2 U (putative)	gene	biological_process-&-1&-GO:0016574-&&-histone ubiquitination-%%-GO:0000209-&&-protein polyubiquitination-%%-GO:0006281-&&-DNA repair-%%-GO:0043161-&&-proteasome-mediated ubiquitin-dependent protein catabolic process|cellular_component-&-1&-GO:0000790-&&-nuclear chromatin-%%-GO:0033503-&&-HULC complex-%%-GO:0005737-&&-cytoplasm|molecular_function-&-1&-GO:0005524-&&-ATP binding-%%-GO:0061630-&&-ubi…	G:9606:UBE2U		FALSE	KEGG-&-1&-hsa04120-&&-Ubiquitin mediated proteolysis	UBE2U	Homo sapiens (Human)-&&-9606	Gene Symbol-&-1&-UBE2U		0.367977	0.0423529	51	4		FALSE		UBE2U	UBE2U	80.3725		0	51	0	0.713739	FALSE	0	UBE2U	157648		0.0356522
596744	taxon:9606	2.74654		2.652e-05	180357	1902	hemoglobin subunit beta	gene	biological_process-&-1&-GO:0015671-&&-oxygen transport-%%-GO:0070293-&&-renal absorption-%%-GO:0010942-&&-positive regulation of cell death-%%-GO:0051291-&&-protein heterooligomerization-%%-GO:0042542-&&-response to hydrogen peroxide-%%-GO:0070527-&&-platelet aggregation-%%-GO:0008217-&&-regulation of blood pressure-%%-GO:0015701-&&-bicarbonate transport-%%-GO:0007596-&&-blood coagulation-%%-GO:0…	G:9606:HBB		FALSE	KEGG-&-1&-hsa05144-&&-Malaria-%%-hsa05143-&&-African trypanosomiasis	HBB	Homo sapiens (Human)-&&-9606	Gene Symbol-&-1&-HBB		0.364095	0.126316	22	4		FALSE		HBB	HBB	164.6		0	21	0	0.70891	FALSE	1	HBB	59120		0.0799513
596745	taxon:9606	2.58718		0.00011766	180360	1902	hemoglobin subunit alpha 2	gene	biological_process-&-1&-GO:0015671-&&-oxygen transport-%%-GO:0042744-&&-hydrogen peroxide catabolic process-%%-GO:0010942-&&-positive regulation of cell death-%%-GO:0051291-&&-protein heterooligomerization-%%-GO:0042542-&&-response to hydrogen peroxide-%%-GO:0015701-&&-bicarbonate transport-%%-GO:0098869-&&-cellular oxidant detoxification-%%-GO:0006898-&&-receptor-mediated endocytosis|cellular_co…	G:9606:HBA2		FALSE	KEGG-&-1&-hsa05144-&&-Malaria-%%-hsa05143-&&-African trypanosomiasis	HBA2	Homo sapiens (Human)-&&-9606	Gene Symbol-&-1&-HBA2		0.386521	0.112957	45	4		FALSE		HBA2	HBA2	173.605		0	44	0	0.73547	FALSE	1	HBA2	285796		0.0540993
596746	taxon:9606	2.58718		0.00011766	180361	1902	hemoglobin subunit alpha 1	gene	biological_process-&-1&-GO:0015671-&&-oxygen transport-%%-GO:0042744-&&-hydrogen peroxide catabolic process-%%-GO:0010942-&&-positive regulation of cell death-%%-GO:0051291-&&-protein heterooligomerization-%%-GO:0042542-&&-response to hydrogen peroxide-%%-GO:0015701-&&-bicarbonate transport-%%-GO:0098869-&&-cellular oxidant detoxification-%%-GO:0006898-&&-receptor-mediated endocytosis|cellular_co…	G:9606:HBA1		FALSE	KEGG-&-1&-hsa05144-&&-Malaria-%%-hsa05143-&&-African trypanosomiasis	HBA1	Homo sapiens (Human)-&&-9606	Gene Symbol-&-1&-HBA1		0.386521	0.112957	45	4		FALSE		HBA1	HBA1	173.605		0	44	0	0.73547	FALSE	1	HBA1	285796		0.0540993
596747	taxon:9606	2.74731		1.44e-06	163977	1902	circadian associated repressor of transcription	gene	biological_process-&-1&-GO:0045475-&&-locomotor rhythm-%%-GO:0032922-&&-circadian regulation of gene expression-%%-GO:0045892-&&-negative regulation of transcription, DNA-templated-%%-GO:0006351-&&-transcription, DNA-templated|cellular_component-&-1&-GO:0005634-&&-nucleus-%%-GO:0016605-&&-PML body|molecular_function-&-1&-GO:0001046-&&-core promoter sequence-specific DNA binding-%%-GO:0005515-&&-p…	G:9606:CIART		FALSE		CIART	Homo sapiens (Human)-&&-9606	Gene Symbol-&-1&-CIART		0.363993	0.333333	3	4		FALSE		CIART	CIART	752.667		0	3	0	0.708782	FALSE	0	CIART	2878		0.337824
596748	taxon:9606	2.50231		3.704e-05	180367	1902	hydroxyacyl-CoA dehydrogenase	gene	biological_process-&-1&-GO:0014823-&&-response to activity-%%-GO:0046676-&&-negative regulation of insulin secretion-%%-GO:0006635-&&-fatty acid beta-oxidation-%%-GO:0032868-&&-response to insulin-%%-GO:0042493-&&-response to drug|cellular_component-&-1&-GO:0005737-&&-cytoplasm-%%-GO:0005759-&&-mitochondrial matrix-%%-GO:0005654-&&-nucleoplasm-%%-GO:0005739-&&-mitochondrion-%%-GO:0005743-&&-mitoc…	G:9606:HADH		FALSE	KEGG-&-1&-hsa01212-&&-Fatty acid metabolism-%%-hsa00280-&&-Valine, leucine and isoleucine degradation-%%-hsa00062-&&-Fatty acid elongation-%%-hsa01100-&&-Metabolic pathways-%%-hsa00310-&&-Lysine degradation-%%-hsa00650-&&-Butanoate metabolism-%%-hsa00071-&&-Fatty acid degradation-%%-hsa00380-&&-Tryptophan metabolism	HADH	Homo sapiens (Human)-&&-9606	Gene Symbol-&-1&-HADH		0.399631	0.128655	21	4		FALSE		HADH	HADH	273.421		0	20	0	0.749615	FALSE	1	HADH	80862		0.0699912
596749	taxon:9606	2.62115		3.726e-05	180365	1902	histidyl-tRNA synthetase	gene	biological_process-&-1&-GO:0006418-&&-tRNA aminoacylation for protein translation-%%-GO:0032543-&&-mitochondrial translation-%%-GO:0006412-&&-translation-%%-GO:0006427-&&-histidyl-tRNA aminoacylation|cellular_component-&-1&-GO:0005739-&&-mitochondrion-%%-GO:0005829-&&-cytosol-%%-GO:0005737-&&-cytoplasm|molecular_function-&-1&-GO:0004821-&&-histidine-tRNA ligase activity-%%-GO:0005524-&&-ATP bindi…	G:9606:HARS		FALSE	KEGG-&-1&-hsa00970-&&-Aminoacyl-tRNA biosynthesis	HARS	Homo sapiens (Human)-&&-9606	Gene Symbol-&-1&-HARS		0.381511	0.14175	43	4		FALSE		HARS	HARS	140.163		0	43	0	0.729808	FALSE	0	HARS	91188		0.0469087
596750	taxon:9606	2.4291	395.792	9.742e-05	180370	1902	hydroxyacyl-CoA dehydrogenase/3-ketoacyl-CoA thiolase/enoyl-CoA hydratase (trifunctional protein), alpha subunit	gene	biological_process-&-1&-GO:0035965-&&-cardiolipin acyl-chain remodeling-%%-GO:0006635-&&-fatty acid beta-oxidation-%%-GO:0032868-&&-response to insulin-%%-GO:0042493-&&-response to drug|cellular_component-&-1&-GO:0042645-&&-mitochondrial nucleoid-%%-GO:0031012-&&-extracellular matrix-%%-GO:0005739-&&-mitochondrion-%%-GO:0005743-&&-mitochondrial inner membrane-%%-GO:0016507-&&-mitochondrial fatty …	G:9606:HADHA		FALSE	KEGG-&-1&-hsa01212-&&-Fatty acid metabolism-%%-hsa00280-&&-Valine, leucine and isoleucine degradation-%%-hsa00640-&&-Propanoate metabolism-%%-hsa01100-&&-Metabolic pathways-%%-hsa00310-&&-Lysine degradation-%%-hsa01200-&&-Carbon metabolism-%%-hsa00062-&&-Fatty acid elongation-%%-hsa00650-&&-Butanoate metabolism-%%-hsa00410-&&-beta-Alanine metabolism-%%-hsa00071-&&-Fatty acid degradation-%%-hsa003…	HADHA	Homo sapiens (Human)-&&-9606	Gene Symbol-&-1&-HADHA	0.497927	0.411675	0.0993151	73	4	0.0135215	FALSE	7.69811	HADHA	HADHA	220.151	7.96597	0	73	0	0.761816	FALSE	0	HADHA	359450	Infinity	0.0499857
596751	taxon:9606	2.69744		1.483e-05	180371	1902	hydroxyacylglutathione hydrolase	gene	biological_process-&-1&-GO:0019243-&&-methylglyoxal catabolic process to D-lactate via S-lactoyl-glutathione-%%-GO:0006750-&&-glutathione biosynthetic process-%%-GO:0006090-&&-pyruvate metabolic process|cellular_component-&-1&-GO:0005829-&&-cytosol-%%-GO:0005759-&&-mitochondrial matrix-%%-GO:0070062-&&-extracellular exosome|molecular_function-&-1&-GO:0004416-&&-hydroxyacylglutathione hydrolase ac…	G:9606:HAGH		FALSE	KEGG-&-1&-hsa00620-&&-Pyruvate metabolism	HAGH	Homo sapiens (Human)-&&-9606	Gene Symbol-&-1&-HAGH		0.370722	0	6	4		FALSE		HAGH	HAGH	459.167		0	6	0	0.717094	FALSE	0	HAGH	22588		0.18138
596752	taxon:9606	2.24		0.00030327	180368	1902	hydroxyacyl-CoA dehydrogenase/3-ketoacyl-CoA thiolase/enoyl-CoA hydratase (trifunctional protein), beta subunit	gene	biological_process-&-1&-GO:0035965-&&-cardiolipin acyl-chain remodeling-%%-GO:0006635-&&-fatty acid beta-oxidation|cellular_component-&-1&-GO:0005739-&&-mitochondrion-%%-GO:0070062-&&-extracellular exosome-%%-GO:0042645-&&-mitochondrial nucleoid-%%-GO:0005783-&&-endoplasmic reticulum-%%-GO:0005741-&&-mitochondrial outer membrane-%%-GO:0005740-&&-mitochondrial envelope-%%-GO:0005743-&&-mitochondri…	G:9606:HADHB		FALSE	KEGG-&-1&-hsa01212-&&-Fatty acid metabolism-%%-hsa00280-&&-Valine, leucine and isoleucine degradation-%%-hsa01100-&&-Metabolic pathways-%%-hsa00062-&&-Fatty acid elongation-%%-hsa00071-&&-Fatty acid degradation	HADHB	Homo sapiens (Human)-&&-9606	Gene Symbol-&-1&-HADHB		0.446429	0.116827	65	4		FALSE		HADHB	HADHB	262.569		0	65	0	0.793333	FALSE	0	HADHB	579282		0.0446998
596753	taxon:9606	2.49744	806.232	0.00043305	180374	1902	histone cluster 1 H1 family member a	gene	biological_process-&-1&-GO:0007283-&&-spermatogenesis-%%-GO:0006334-&&-nucleosome assembly|cellular_component-&-1&-GO:0000786-&&-nucleosome-%%-GO:0005719-&&-nuclear euchromatin-%%-GO:0000790-&&-nuclear chromatin|molecular_function-&-1&-GO:0005515-&&-protein binding-%%-GO:0031490-&&-chromatin DNA binding	G:9606:HIST1H1A		FALSE		HIST1H1A	Homo sapiens (Human)-&&-9606	Gene Symbol-&-1&-HIST1H1A	0.493094	0.400411	0.101653	137	4	0.0205944	FALSE	18.1266	HIST1H1A	HIST1H1A	135.496	20.0601	0	137	0	0.750427	FALSE	0	HIST1H1A	1064128	Infinity	0.0355741
596754	taxon:9606	2.63192		3.421e-05	163990	1902	synaptotagmin 6	gene	biological_process-&-1&-GO:0060478-&&-acrosomal vesicle exocytosis-%%-GO:0048791-&&-calcium ion-regulated exocytosis of neurotransmitter-%%-GO:0017158-&&-regulation of calcium ion-dependent exocytosis-%%-GO:0006906-&&-vesicle fusion|cellular_component-&-1&-GO:0030054-&&-cell junction-%%-GO:0005886-&&-plasma membrane-%%-GO:0005829-&&-cytosol-%%-GO:0097038-&&-perinuclear endoplasmic reticulum-%%-GO…	G:9606:SYT6		FALSE		SYT6	Homo sapiens (Human)-&&-9606	Gene Symbol-&-1&-SYT6		0.37995	0.043956	16	4		FALSE		SYT6	SYT6	252.929		0	15	0	0.728013	FALSE	1	SYT6	57186		0.08607
596755	taxon:9606	2.48321	361.669	0.00011553	180375	1902	H3 histone family member 3B	gene	biological_process-&-1&-GO:0006997-&&-nucleus organization-%%-GO:0006334-&&-nucleosome assembly-%%-GO:0042692-&&-muscle cell differentiation-%%-GO:0006336-&&-DNA replication-independent nucleosome assembly-%%-GO:0031047-&&-gene silencing by RNA-%%-GO:0031508-&&-pericentric heterochromatin assembly-%%-GO:0035264-&&-multicellular organism growth-%%-GO:1902340-&&-negative regulation of chromosome co…	G:9606:H3F3B		FALSE	KEGG-&-1&-hsa05202-&&-Transcriptional misregulation in cancer-%%-hsa05034-&&-Alcoholism-%%-hsa05322-&&-Systemic lupus erythematosus	H3F3B	Homo sapiens (Human)-&&-9606	Gene Symbol-&-1&-H3F3B	0.495499	0.402705	0.154136	118	4	0.0212369	FALSE	21.4074	H3F3B	H3F3B	156.051	22.8765	0	118	0	0.752799	FALSE	0	H3F3B	560476	Infinity	0.0396162
596756	taxon:9606	2.25346	374.434	0.00052621	180372	1902	hydroxysteroid 17-beta dehydrogenase 10	gene	biological_process-&-1&-GO:0009083-&&-branched-chain amino acid catabolic process-%%-GO:0070901-&&-mitochondrial tRNA methylation-%%-GO:0006629-&&-lipid metabolic process-%%-GO:0055114-&&-oxidation-reduction process-%%-GO:0090646-&&-mitochondrial tRNA processing|cellular_component-&-1&-GO:0005737-&&-cytoplasm-%%-GO:0005739-&&-mitochondrion-%%-GO:0005759-&&-mitochondrial matrix-%%-GO:0005886-&&-pl…	G:9606:HSD17B10		FALSE	KEGG-&-1&-hsa00280-&&-Valine, leucine and isoleucine degradation-%%-hsa01100-&&-Metabolic pathways-%%-hsa05010-&&-Alzheimer disease	HSD17B10	Homo sapiens (Human)-&&-9606	Gene Symbol-&-1&-HSD17B10	0.499244	0.443762	0.112891	117	4	0.0180187	FALSE	17.4194	HSD17B10	HSD17B10	183.104	18.3682	0	116	0	0.79109	FALSE	1	HSD17B10	1077572	Infinity	0.0320332
596757	taxon:9606	2.41013	489.567	0.00047997	180378	1902	histone cluster 1 H2B family member d	gene	biological_process-&-1&-GO:0006334-&&-nucleosome assembly-%%-GO:0016567-&&-protein ubiquitination|cellular_component-&-1&-GO:0005634-&&-nucleus-%%-GO:0070062-&&-extracellular exosome-%%-GO:0000786-&&-nucleosome-%%-GO:0005829-&&-cytosol-%%-GO:0005654-&&-nucleoplasm|molecular_function-&-1&-GO:0003674-&&-molecular_function-%%-GO:0046982-&&-protein heterodimerization activity-%%-GO:0003677-&&-DNA bin…	G:9606:HIST1H2BD		FALSE	KEGG-&-1&-hsa05034-&&-Alcoholism-%%-hsa05203-&&-Viral carcinogenesis-%%-hsa05322-&&-Systemic lupus erythematosus	HIST1H2BD	Homo sapiens (Human)-&&-9606	Gene Symbol-&-1&-HIST1H2BD	0.498867	0.414916	0.0218579	184	4	0.0137688	FALSE	5.74627	HIST1H2BD	HIST1H2BD	95.5924	6.29459	0	184	0	0.764979	FALSE	0	HIST1H2BD	1902768	Infinity	0.0216221
596758	taxon:9606	2.76667		0	163994	1902	DIRAS family GTPase 1	gene	biological_process-&-1&-GO:0043406-&&-positive regulation of MAP kinase activity-%%-GO:0007264-&&-small GTPase mediated signal transduction|cellular_component-&-1&-GO:0005886-&&-plasma membrane-%%-GO:0005622-&&-intracellular|molecular_function-&-1&-GO:0005525-&&-GTP binding-%%-GO:0051019-&&-mitogen-activated protein kinase binding-%%-GO:0003924-&&-GTPase activity	G:9606:DIRAS1		FALSE		DIRAS1	Homo sapiens (Human)-&&-9606	Gene Symbol-&-1&-DIRAS1		0.361446	0	1	4		FALSE		DIRAS1	DIRAS1	2132		0	1	0	0.705556	FALSE	0	DIRAS1	0		0
596759	taxon:9606	2.48321	361.669	0.00011553	180376	1902	H3 histone family member 3A	gene	biological_process-&-1&-GO:0006997-&&-nucleus organization-%%-GO:0006334-&&-nucleosome assembly-%%-GO:0042692-&&-muscle cell differentiation-%%-GO:0006336-&&-DNA replication-independent nucleosome assembly-%%-GO:0031047-&&-gene silencing by RNA-%%-GO:0031508-&&-pericentric heterochromatin assembly-%%-GO:0035264-&&-multicellular organism growth-%%-GO:1902340-&&-negative regulation of chromosome co…	G:9606:H3F3A		FALSE	KEGG-&-1&-hsa05202-&&-Transcriptional misregulation in cancer-%%-hsa05034-&&-Alcoholism-%%-hsa05322-&&-Systemic lupus erythematosus	H3F3A	Homo sapiens (Human)-&&-9606	Gene Symbol-&-1&-H3F3A	0.495499	0.402705	0.154136	118	4	0.0212369	FALSE	21.4074	H3F3A	H3F3A	156.051	22.8765	0	118	0	0.752799	FALSE	0	H3F3A	560476	Infinity	0.0396162
596760	taxon:9606	2.44679		4.567e-05	180377	1902	histone cluster 1 H2B family member b	gene	biological_process-&-1&-GO:0006334-&&-nucleosome assembly-%%-GO:0016567-&&-protein ubiquitination|cellular_component-&-1&-GO:0005634-&&-nucleus-%%-GO:0005829-&&-cytosol-%%-GO:0005654-&&-nucleoplasm-%%-GO:0000784-&&-nuclear chromosome, telomeric region-%%-GO:0000786-&&-nucleosome|molecular_function-&-1&-GO:0046982-&&-protein heterodimerization activity-%%-GO:0003677-&&-DNA binding-%%-GO:0005515-&&…	G:9606:HIST1H2BB		FALSE	KEGG-&-1&-hsa05034-&&-Alcoholism-%%-hsa05203-&&-Viral carcinogenesis-%%-hsa05322-&&-Systemic lupus erythematosus	HIST1H2BB	Homo sapiens (Human)-&&-9606	Gene Symbol-&-1&-HIST1H2BB		0.408698	0.456831	61	4		FALSE		HIST1H2BB	HIST1H2BB	263.984		0	61	0	0.758868	FALSE	0	HIST1H2BB	210758		0.0616458
596761	taxon:9606	2.50487	94.3714	3.717e-05	180382	1902	histone cluster 1 H2A family member e	gene	biological_process-&-1&-GO:0006342-&&-chromatin silencing-%%-GO:0008285-&&-negative regulation of cell proliferation|cellular_component-&-1&-GO:0005634-&&-nucleus-%%-GO:0000790-&&-nuclear chromatin-%%-GO:0070062-&&-extracellular exosome-%%-GO:0000786-&&-nucleosome|molecular_function-&-1&-GO:0046982-&&-protein heterodimerization activity-%%-GO:0003677-&&-DNA binding	G:9606:HIST1H2AE		FALSE	KEGG-&-1&-hsa05034-&&-Alcoholism-%%-hsa05322-&&-Systemic lupus erythematosus-%%-hsa04217-&&-Necroptosis	HIST1H2AE	Homo sapiens (Human)-&&-9606	Gene Symbol-&-1&-HIST1H2AE	0.494201	0.399222	0.377638	76	4	0.022518	FALSE	31.0484	HIST1H2AE	HIST1H2AE	262.338	31.5607	0	75	0	0.749188	FALSE	1	HIST1H2AE	201594	Infinity	0.0684776
596762	taxon:9606	2.25128	2355.1	0.00089535	180380	1902	H2A histone family member X	gene	biological_process-&-1&-GO:0071480-&&-cellular response to gamma radiation-%%-GO:0006342-&&-chromatin silencing-%%-GO:0021987-&&-cerebral cortex development-%%-GO:0010212-&&-response to ionizing radiation-%%-GO:0006334-&&-nucleosome assembly-%%-GO:0006303-&&-double-strand break repair via nonhomologous end joining-%%-GO:0045739-&&-positive regulation of DNA repair-%%-GO:0090398-&&-cellular senesc…	G:9606:H2AFX		FALSE	KEGG-&-1&-hsa05034-&&-Alcoholism-%%-hsa05322-&&-Systemic lupus erythematosus-%%-hsa04217-&&-Necroptosis	H2AFX	Homo sapiens (Human)-&&-9606	Gene Symbol-&-1&-H2AFX	0.530522	0.444191	0.105425	236	4	0.0419848	FALSE	31.2222	H2AFX	H2AFX	167.902	44.0198	0	235	0	0.791453	FALSE	1	H2AFX	2627780	Infinity	0.0299412
596763	taxon:9606	2.75962		2.31e-06	180381	1902	histone cluster 1 H2A family member d	gene	biological_process-&-1&-GO:0006342-&&-chromatin silencing-%%-GO:0008150-&&-biological_process|cellular_component-&-1&-GO:0005634-&&-nucleus-%%-GO:0000790-&&-nuclear chromatin-%%-GO:0070062-&&-extracellular exosome-%%-GO:0000786-&&-nucleosome|molecular_function-&-1&-GO:0003674-&&-molecular_function-%%-GO:0046982-&&-protein heterodimerization activity-%%-GO:0003677-&&-DNA binding	G:9606:HIST1H2AD		FALSE	KEGG-&-1&-hsa05034-&&-Alcoholism-%%-hsa05322-&&-Systemic lupus erythematosus-%%-hsa04217-&&-Necroptosis	HIST1H2AD	Homo sapiens (Human)-&&-9606	Gene Symbol-&-1&-HIST1H2AD		0.362369	0.426667	25	4		FALSE		HIST1H2AD	HIST1H2AD	216.36		0	25	0	0.706731	FALSE	0	HIST1H2AD	12452		0.110066
596764	taxon:9606	2.55359		5.985e-05	180386	1902	histone cluster 1 H1 family member d	gene	biological_process-&-1&-GO:0016584-&&-nucleosome positioning-%%-GO:0098532-&&-histone H3-K27 trimethylation-%%-GO:0000122-&&-negative regulation of transcription from RNA polymerase II promoter-%%-GO:0006334-&&-nucleosome assembly-%%-GO:0080182-&&-histone H3-K4 trimethylation|cellular_component-&-1&-GO:0000786-&&-nucleosome-%%-GO:0005719-&&-nuclear euchromatin-%%-GO:0000790-&&-nuclear chromatin|m…	G:9606:HIST1H1D		FALSE		HIST1H1D	Homo sapiens (Human)-&&-9606	Gene Symbol-&-1&-HIST1H1D		0.391606	0.123755	38	4		FALSE		HIST1H1D	HIST1H1D	262.526		0	38	0	0.741068	FALSE	0	HIST1H1D	159182		0.0756323
596765	taxon:9606	2.43115	307.049	8.816e-05	180387	1902	histone cluster 1 H1 family member c	gene	biological_process-&-1&-GO:0016584-&&-nucleosome positioning-%%-GO:0098532-&&-histone H3-K27 trimethylation-%%-GO:0000122-&&-negative regulation of transcription from RNA polymerase II promoter-%%-GO:0006334-&&-nucleosome assembly-%%-GO:0080182-&&-histone H3-K4 trimethylation|cellular_component-&-1&-GO:0005634-&&-nucleus-%%-GO:0035327-&&-transcriptionally active chromatin-%%-GO:0000786-&&-nucleos…	G:9606:HIST1H1C		FALSE		HIST1H1C	Homo sapiens (Human)-&&-9606	Gene Symbol-&-1&-HIST1H1C	0.500379	0.411327	0.205746	86	4	0.0240591	FALSE	19.3971	HIST1H1C	HIST1H1C	255.093	19.9674	0	86	0	0.761474	FALSE	0	HIST1H1C	392784	Infinity	0.0583417
596766	taxon:9606	2.52474		7.162e-05	180384	1902	histone cluster 1 H1 family member b	gene	biological_process-&-1&-GO:0000122-&&-negative regulation of transcription from RNA polymerase II promoter-%%-GO:0051574-&&-positive regulation of histone H3-K9 methylation-%%-GO:0050821-&&-protein stabilization-%%-GO:0030307-&&-positive regulation of cell growth-%%-GO:0006325-&&-chromatin organization-%%-GO:0006334-&&-nucleosome assembly-%%-GO:0071169-&&-establishment of protein localization to …	G:9606:HIST1H1B		FALSE		HIST1H1B	Homo sapiens (Human)-&&-9606	Gene Symbol-&-1&-HIST1H1B		0.39608	0.16776	61	4		FALSE		HIST1H1B	HIST1H1B	231.803		0	61	0	0.745876	FALSE	0	HIST1H1B	263654		0.0629506
596767	taxon:9606	2.64321		1.996e-05	180385	1902	histone cluster 1 H1 family member e	gene	biological_process-&-1&-GO:0016584-&&-nucleosome positioning-%%-GO:0098532-&&-histone H3-K27 trimethylation-%%-GO:0000122-&&-negative regulation of transcription from RNA polymerase II promoter-%%-GO:0006334-&&-nucleosome assembly-%%-GO:0080182-&&-histone H3-K4 trimethylation|cellular_component-&-1&-GO:0005634-&&-nucleus-%%-GO:0005720-&&-nuclear heterochromatin-%%-GO:0070062-&&-extracellular exos…	G:9606:HIST1H1E		FALSE		HIST1H1E	Homo sapiens (Human)-&&-9606	Gene Symbol-&-1&-HIST1H1E		0.378329	0.312195	41	4		FALSE		HIST1H1E	HIST1H1E	270.341		0	41	0	0.726132	FALSE	0	HIST1H1E	91820		0.0957466
596768	taxon:9606	2.72872		3.74e-05	180391	1902	granzyme B	gene	biological_process-&-1&-GO:0006915-&&-apoptotic process-%%-GO:0016485-&&-protein processing-%%-GO:0042267-&&-natural killer cell mediated cytotoxicity-%%-GO:1900740-&&-positive regulation of protein insertion into mitochondrial membrane involved in apoptotic signaling pathway-%%-GO:0019835-&&-cytolysis|cellular_component-&-1&-GO:0005829-&&-cytosol-%%-GO:0005634-&&-nucleus-%%-GO:0005739-&&-mitocho…	G:9606:GZMB		FALSE	KEGG-&-1&-hsa05202-&&-Transcriptional misregulation in cancer-%%-hsa04210-&&-Apoptosis-%%-hsa05332-&&-Graft-versus-host disease-%%-hsa04940-&&-Type I diabetes mellitus-%%-hsa05320-&&-Autoimmune thyroid disease-%%-hsa04650-&&-Natural killer cell mediated cytotoxicity-%%-hsa05330-&&-Allograft rejection	GZMB	Homo sapiens (Human)-&&-9606	Gene Symbol-&-1&-GZMB		0.366472	0.126984	30	4		FALSE		GZMB	GZMB	132.321		0	29	0	0.71188	FALSE	1	GZMB	65498		0.062068
596769	taxon:9606	2.42038		2.546e-05	180388	1902	H1 histone family member 0	gene	biological_process-&-1&-GO:0006309-&&-apoptotic DNA fragmentation-%%-GO:0006334-&&-nucleosome assembly|cellular_component-&-1&-GO:0005634-&&-nucleus-%%-GO:0000786-&&-nucleosome-%%-GO:0005719-&&-nuclear euchromatin-%%-GO:0016604-&&-nuclear body-%%-GO:0000790-&&-nuclear chromatin-%%-GO:0015629-&&-actin cytoskeleton-%%-GO:0005654-&&-nucleoplasm-%%-GO:0005794-&&-Golgi apparatus|molecular_function-&-1…	G:9606:H1F0		FALSE		H1F0	Homo sapiens (Human)-&&-9606	Gene Symbol-&-1&-H1F0		0.413157	0.161376	28	4		FALSE		H1F0	H1F0	330.929		0	28	0	0.763269	FALSE	0	H1F0	89600		0.0731902
596770	taxon:9606	2.74564		1.99e-06	180392	1902	granzyme A	gene	biological_process-&-1&-GO:0006915-&&-apoptotic process-%%-GO:0043065-&&-positive regulation of apoptotic process-%%-GO:0043392-&&-negative regulation of DNA binding-%%-GO:0019835-&&-cytolysis-%%-GO:0032078-&&-negative regulation of endodeoxyribonuclease activity-%%-GO:0051603-&&-proteolysis involved in cellular protein catabolic process-%%-GO:0006955-&&-immune response-%%-GO:0051354-&&-negative …	G:9606:GZMA		FALSE	KEGG-&-1&-hsa04080-&&-Neuroactive ligand-receptor interaction	GZMA	Homo sapiens (Human)-&&-9606	Gene Symbol-&-1&-GZMA		0.364214	0.183333	18	4		FALSE		GZMA	GZMA	212.875		0	17	0	0.70906	FALSE	1	GZMA	10900		0.103177
596771	taxon:9606	2.91436		4.98e-06	164008	1902	family with sequence similarity 187 member B	gene	cellular_component-&-1&-GO:0016021-&&-integral component of membrane	G:9606:FAM187B		FALSE		FAM187B	Homo sapiens (Human)-&&-9606	Gene Symbol-&-1&-FAM187B		0.343129	0.0277778	9	4		FALSE		FAM187B	FAM187B	130.333		0	9	0	0.68094	FALSE	0	FAM187B	10504		0.148573
596772	taxon:9606	3.19282		5.27e-06	180393	1902	guanylate cyclase 2D, retinal	gene	biological_process-&-1&-GO:0035556-&&-intracellular signal transduction-%%-GO:0006182-&&-cGMP biosynthetic process-%%-GO:0006468-&&-protein phosphorylation-%%-GO:0007168-&&-receptor guanylyl cyclase signaling pathway-%%-GO:0022400-&&-regulation of rhodopsin mediated signaling pathway-%%-GO:0007601-&&-visual perception|cellular_component-&-1&-GO:0005640-&&-nuclear outer membrane-%%-GO:0005887-&&-i…	G:9606:GUCY2D		FALSE	KEGG-&-1&-hsa04740-&&-Olfactory transduction-%%-hsa04744-&&-Phototransduction-%%-hsa00230-&&-Purine metabolism	GUCY2D	Homo sapiens (Human)-&&-9606	Gene Symbol-&-1&-GUCY2D		0.313203	0	3	5		FALSE		GUCY2D	GUCY2D	131.667		0	3	0	0.63453	FALSE	0	GUCY2D	3298		0.335043
596773	taxon:9606	2.70013		3.945e-05	164012	1902	toll like receptor adaptor molecule 1	gene	biological_process-&-1&-GO:0045087-&&-innate immune response-%%-GO:0051092-&&-positive regulation of NF-kappaB transcription factor activity-%%-GO:0010508-&&-positive regulation of autophagy-%%-GO:0030890-&&-positive regulation of B cell proliferation-%%-GO:0045080-&&-positive regulation of chemokine biosynthetic process-%%-GO:0031398-&&-positive regulation of protein ubiquitination-%%-GO:0032760…	G:9606:TICAM1		FALSE	KEGG-&-1&-hsa05168-&&-Herpes simplex infection-%%-hsa04620-&&-Toll-like receptor signaling pathway-%%-hsa05160-&&-Hepatitis C-%%-hsa05133-&&-Pertussis-%%-hsa05142-&&-Chagas disease (American trypanosomiasis)-%%-hsa05164-&&-Influenza A-%%-hsa05167-&&-Kaposi sarcoma-associated herpesvirus infection-%%-hsa04621-&&-NOD-like receptor signaling pathway-%%-hsa05165-&&-Human papillomavirus infection-%%-h…	TICAM1	Homo sapiens (Human)-&&-9606	Gene Symbol-&-1&-TICAM1		0.370353	0.191597	37	4		FALSE		TICAM1	TICAM1	119.229		0	36	0	0.716645	FALSE	1	TICAM1	82980		0.05046
596774	taxon:9606	2.405		9.666e-05	180396	1902	glycogen synthase 1	gene	biological_process-&-1&-GO:0007507-&&-heart development-%%-GO:0005978-&&-glycogen biosynthetic process|cellular_component-&-1&-GO:0005829-&&-cytosol-%%-GO:0016234-&&-inclusion body-%%-GO:0016020-&&-membrane|molecular_function-&-1&-GO:0061547-&&-glycogen synthase activity, transferring glucose-1-phosphate-%%-GO:0004373-&&-glycogen (starch) synthase activity-%%-GO:0005536-&&-glucose binding-%%-GO:0…	G:9606:GYS1		FALSE	KEGG-&-1&-hsa04910-&&-Insulin signaling pathway-%%-hsa04931-&&-Insulin resistance-%%-hsa04152-&&-AMPK signaling pathway-%%-hsa04922-&&-Glucagon signaling pathway-%%-hsa01100-&&-Metabolic pathways-%%-hsa04151-&&-PI3K-Akt signaling pathway-%%-hsa00500-&&-Starch and sucrose metabolism	GYS1	Homo sapiens (Human)-&&-9606	Gene Symbol-&-1&-GYS1		0.4158	0.0935961	29	4		FALSE		GYS1	GYS1	280.414		0	29	0	0.765833	FALSE	0	GYS1	191256		0.060267
596775	taxon:9606	3.28667		0	164013	1902	tetratricopeptide repeat domain 9B	gene	biological_process-&-1&-GO:0008150-&&-biological_process|cellular_component-&-1&-GO:0005575-&&-cellular_component|molecular_function-&-1&-GO:0003674-&&-molecular_function	G:9606:TTC9B		FALSE		TTC9B	Homo sapiens (Human)-&&-9606	Gene Symbol-&-1&-TTC9B		0.30426	0	1	5		FALSE		TTC9B	TTC9B	221		0	1	0	0.618889	FALSE	0	TTC9B	0		0
596776	taxon:9606	2.92308		7.9e-06	180402	1902	glucuronidase beta	gene	biological_process-&-1&-GO:0005975-&&-carbohydrate metabolic process-%%-GO:0030214-&&-hyaluronan catabolic process-%%-GO:0043312-&&-neutrophil degranulation-%%-GO:0006027-&&-glycosaminoglycan catabolic process|cellular_component-&-1&-GO:0005615-&&-extracellular space-%%-GO:1904813-&&-ficolin-1-rich granule lumen-%%-GO:0070062-&&-extracellular exosome-%%-GO:0035578-&&-azurophil granule lumen-%%-GO…	G:9606:GUSB		FALSE	KEGG-&-1&-hsa00531-&&-Glycosaminoglycan degradation-%%-hsa00983-&&-Drug metabolism - other enzymes-%%-hsa01100-&&-Metabolic pathways-%%-hsa04142-&&-Lysosome-%%-hsa00860-&&-Porphyrin and chlorophyll metabolism-%%-hsa00040-&&-Pentose and glucuronate interconversions	GUSB	Homo sapiens (Human)-&&-9606	Gene Symbol-&-1&-GUSB		0.342105	0.0714286	10	4		FALSE		GUSB	GUSB	133.125		0	9	0	0.679487	FALSE	1	GUSB	11926		0.137591
596777	taxon:9606	2.77115		1.241e-05	164023	1902	zinc finger protein 420	gene	biological_process-&-1&-GO:0006355-&&-regulation of transcription, DNA-templated-%%-GO:0042981-&&-regulation of apoptotic process-%%-GO:0006351-&&-transcription, DNA-templated|cellular_component-&-1&-GO:0070062-&&-extracellular exosome-%%-GO:0005654-&&-nucleoplasm|molecular_function-&-1&-GO:0003677-&&-DNA binding-%%-GO:0046872-&&-metal ion binding-%%-GO:0005515-&&-protein binding-%%-GO:0003700-&&…	G:9606:ZNF420		FALSE		ZNF420	Homo sapiens (Human)-&&-9606	Gene Symbol-&-1&-ZNF420		0.360861	0.236364	11	4		FALSE		ZNF420	ZNF420	244.364		0	11	0	0.704808	FALSE	0	ZNF420	17280		0.128247
596778	taxon:9606	2.88731		3.69e-06	164021	1902	NLR family pyrin domain containing 4	gene	biological_process-&-1&-GO:0006954-&&-inflammatory response-%%-GO:0032479-&&-regulation of type I interferon production|cellular_component-&-1&-GO:0005829-&&-cytosol-%%-GO:0070062-&&-extracellular exosome|molecular_function-&-1&-GO:0005524-&&-ATP binding	G:9606:NLRP4		FALSE		NLRP4	Homo sapiens (Human)-&&-9606	Gene Symbol-&-1&-NLRP4		0.346343	0.238095	7	4		FALSE		NLRP4	NLRP4	172.714		0	7	0	0.685449	FALSE	0	NLRP4	5258		0.166276
596779	taxon:9606	2.88526		0.00011119	164027	1902	coiled-coil domain containing 155	gene	biological_process-&-1&-GO:0051225-&&-spindle assembly-%%-GO:0048477-&&-oogenesis-%%-GO:0007283-&&-spermatogenesis-%%-GO:0090220-&&-chromosome localization to nuclear envelope involved in homologous chromosome segregation-%%-GO:0034397-&&-telomere localization-%%-GO:0000724-&&-double-strand break repair via homologous recombination-%%-GO:0007129-&&-synapsis-%%-GO:0051653-&&-spindle localization-%…	G:9606:CCDC155		FALSE		CCDC155	Homo sapiens (Human)-&&-9606	Gene Symbol-&-1&-CCDC155		0.34659	0.00757576	33	4		FALSE		CCDC155	CCDC155	39.3939		0	33	0	0.685791	FALSE	0	CCDC155	210182		0.036979
596780	taxon:9606	2.63103		1.518e-05	180408	1902	guanylate cyclase 1 soluble subunit beta	gene	biological_process-&-1&-GO:0007263-&&-nitric oxide mediated signal transduction-%%-GO:0071732-&&-cellular response to nitric oxide-%%-GO:0006182-&&-cGMP biosynthetic process-%%-GO:0038060-&&-nitric oxide-cGMP-mediated signaling pathway-%%-GO:0008015-&&-blood circulation|cellular_component-&-1&-GO:0008074-&&-guanylate cyclase complex, soluble-%%-GO:0005886-&&-plasma membrane|molecular_function-&-1…	G:9606:GUCY1B3		FALSE	KEGG-&-1&-hsa04611-&&-Platelet activation-%%-hsa04022-&&-cGMP-PKG signaling pathway-%%-hsa04270-&&-Vascular smooth muscle contraction-%%-hsa00230-&&-Purine metabolism-%%-hsa04970-&&-Salivary secretion-%%-hsa04924-&&-Renin secretion-%%-hsa04730-&&-Long-term depression-%%-hsa04540-&&-Gap junction-%%-hsa04921-&&-Oxytocin signaling pathway-%%-hsa04713-&&-Circadian entrainment	GUCY1B3	Homo sapiens (Human)-&&-9606	Gene Symbol-&-1&-GUCY1B3		0.38008	0.428571	8	4		FALSE		GUCY1B3	GUCY1B3	412.875		0	8	0	0.728162	FALSE	0	GUCY1B3	12472		0.140721
596781	taxon:9606	2.76962		4.03e-06	180409	1902	guanylate cyclase 1 soluble subunit alpha	gene	biological_process-&-1&-GO:0007263-&&-nitric oxide mediated signal transduction-%%-GO:0052565-&&-response to defense-related host nitric oxide production-%%-GO:0060087-&&-relaxation of vascular smooth muscle-%%-GO:0006182-&&-cGMP biosynthetic process-%%-GO:0008217-&&-regulation of blood pressure-%%-GO:0030828-&&-positive regulation of cGMP biosynthetic process-%%-GO:0008015-&&-blood circulation|c…	G:9606:GUCY1A3		FALSE	KEGG-&-1&-hsa04611-&&-Platelet activation-%%-hsa04022-&&-cGMP-PKG signaling pathway-%%-hsa04270-&&-Vascular smooth muscle contraction-%%-hsa00230-&&-Purine metabolism-%%-hsa04970-&&-Salivary secretion-%%-hsa04730-&&-Long-term depression-%%-hsa04924-&&-Renin secretion-%%-hsa04540-&&-Gap junction-%%-hsa04713-&&-Circadian entrainment-%%-hsa04921-&&-Oxytocin signaling pathway	GUCY1A3	Homo sapiens (Human)-&&-9606	Gene Symbol-&-1&-GUCY1A3		0.361061	0.25	8	4		FALSE		GUCY1A3	GUCY1A3	313.75		0	8	0	0.705064	FALSE	0	GUCY1A3	7114		0.16403
596782	taxon:9606	2.85974		6.74e-06	180414	1902	guanylate cyclase 1 soluble subunit alpha 2	gene	biological_process-&-1&-GO:0035556-&&-intracellular signal transduction-%%-GO:0007165-&&-signal transduction-%%-GO:0030828-&&-positive regulation of cGMP biosynthetic process-%%-GO:0006182-&&-cGMP biosynthetic process|cellular_component-&-1&-GO:0005886-&&-plasma membrane-%%-GO:0008074-&&-guanylate cyclase complex, soluble|molecular_function-&-1&-GO:0004016-&&-adenylate cyclase activity-%%-GO:0005…	G:9606:GUCY1A2		FALSE	KEGG-&-1&-hsa04611-&&-Platelet activation-%%-hsa04022-&&-cGMP-PKG signaling pathway-%%-hsa04270-&&-Vascular smooth muscle contraction-%%-hsa00230-&&-Purine metabolism-%%-hsa04730-&&-Long-term depression-%%-hsa04924-&&-Renin secretion-%%-hsa04970-&&-Salivary secretion-%%-hsa04540-&&-Gap junction-%%-hsa04713-&&-Circadian entrainment-%%-hsa04921-&&-Oxytocin signaling pathway	GUCY1A2	Homo sapiens (Human)-&&-9606	Gene Symbol-&-1&-GUCY1A2		0.349682	0.266667	10	4		FALSE		GUCY1A2	GUCY1A2	169.4		0	10	0	0.690043	FALSE	0	GUCY1A2	11664		0.137085
596783	taxon:9606	2.58038		4.762e-05	180415	1902	general transcription factor IIIC subunit 2	gene	biological_process-&-1&-GO:0042797-&&-tRNA transcription from RNA polymerase III promoter-%%-GO:0006383-&&-transcription from RNA polymerase III promoter-%%-GO:0006351-&&-transcription, DNA-templated-%%-GO:0042791-&&-5S class rRNA transcription from RNA polymerase III type 1 promoter|cellular_component-&-1&-GO:0000127-&&-transcription factor TFIIIC complex-%%-GO:0005654-&&-nucleoplasm|molecular_f…	G:9606:GTF3C2		FALSE		GTF3C2	Homo sapiens (Human)-&&-9606	Gene Symbol-&-1&-GTF3C2		0.387539	0.12439	41	4		FALSE		GTF3C2	GTF3C2	208.463		0	41	0	0.736603	FALSE	0	GTF3C2	123138		0.0632768
596784	taxon:9606	2.58269		5.208e-05	164028	1902	SPC24, NDC80 kinetochore complex component	gene	biological_process-&-1&-GO:0051301-&&-cell division-%%-GO:0007067-&&-mitotic nuclear division-%%-GO:0007062-&&-sister chromatid cohesion|cellular_component-&-1&-GO:0005634-&&-nucleus-%%-GO:0031262-&&-Ndc80 complex-%%-GO:0005829-&&-cytosol-%%-GO:0005730-&&-nucleolus-%%-GO:0000777-&&-condensed chromosome kinetochore|molecular_function-&-1&-GO:0005515-&&-protein binding	G:9606:SPC24		FALSE		SPC24	Homo sapiens (Human)-&&-9606	Gene Symbol-&-1&-SPC24		0.387193	0.16	26	4		FALSE		SPC24	SPC24	169.615		0	26	0	0.736218	FALSE	0	SPC24	88154		0.0515081
596785	taxon:9606	3.12064		5.6e-06	180413	1902	guanylate cyclase activator 1A	gene	biological_process-&-1&-GO:0007601-&&-visual perception-%%-GO:0071277-&&-cellular response to calcium ion-%%-GO:0007165-&&-signal transduction-%%-GO:0031284-&&-positive regulation of guanylate cyclase activity-%%-GO:0007602-&&-phototransduction-%%-GO:0000272-&&-polysaccharide catabolic process-%%-GO:0022400-&&-regulation of rhodopsin mediated signaling pathway|cellular_component-&-1&-GO:0001917-&…	G:9606:GUCA1A		FALSE	KEGG-&-1&-hsa04744-&&-Phototransduction	GUCA1A	Homo sapiens (Human)-&&-9606	Gene Symbol-&-1&-GUCA1A		0.320447	0	2	5		FALSE		GUCA1A	GUCA1A	209		0	2	0	0.64656	FALSE	0	GUCA1A	6596		0.5
596786	taxon:9606	2.75667		1.533e-05	164035	1902	homeodomain interacting protein kinase 4	gene	biological_process-&-1&-GO:0018105-&&-peptidyl-serine phosphorylation-%%-GO:0016572-&&-histone phosphorylation-%%-GO:0046777-&&-protein autophosphorylation-%%-GO:1901796-&&-regulation of signal transduction by p53 class mediator|cellular_component-&-1&-GO:0005737-&&-cytoplasm-%%-GO:0005634-&&-nucleus|molecular_function-&-1&-GO:0004674-&&-protein serine/threonine kinase activity-%%-GO:0005524-&&-A…	G:9606:HIPK4		FALSE	KEGG-&-1&-hsa04218-&&-Cellular senescence	HIPK4	Homo sapiens (Human)-&&-9606	Gene Symbol-&-1&-HIPK4		0.362757	0.0766667	25	4		FALSE		HIPK4	HIPK4	141.04		0	25	0	0.707222	FALSE	0	HIPK4	40422		0.0721026
596787	taxon:9606	2.7241		0	180427	1902	G protein-coupled receptor 15	gene	biological_process-&-1&-GO:0072678-&&-T cell migration-%%-GO:0007186-&&-G-protein coupled receptor signaling pathway|cellular_component-&-1&-GO:0005886-&&-plasma membrane-%%-GO:0005887-&&-integral component of plasma membrane|molecular_function-&-1&-GO:0004930-&&-G-protein coupled receptor activity	G:9606:GPR15	GPR15	TRUE		GPR15	Homo sapiens (Human)-&&-9606	Gene Symbol-&-1&-GPR15		0.367093	1	2	4		FALSE		GPR15	GPR15	1217		0	2	0	0.71265	FALSE	0	GPR15	0		0.516115
596788	taxon:9606	3.45167		1.049e-05	180431	1902	C-X-C motif chemokine receptor 3	gene	biological_process-&-1&-GO:0007204-&&-positive regulation of cytosolic calcium ion concentration-%%-GO:0006915-&&-apoptotic process-%%-GO:0019722-&&-calcium-mediated signaling-%%-GO:0006928-&&-movement of cell or subcellular component-%%-GO:0010818-&&-T cell chemotaxis-%%-GO:0007155-&&-cell adhesion-%%-GO:0006954-&&-inflammatory response-%%-GO:0002685-&&-regulation of leukocyte migration-%%-GO:00…	G:9606:CXCR3		FALSE	KEGG-&-1&-hsa04062-&&-Chemokine signaling pathway-%%-hsa04060-&&-Cytokine-cytokine receptor interaction	CXCR3	Homo sapiens (Human)-&&-9606	Gene Symbol-&-1&-CXCR3		0.289715	0.0277778	11	5		FALSE		CXCR3	CXCR3	11.7778		0	10	0	0.591389	FALSE	1	CXCR3	21004		0.171875
596789	taxon:9606	2.76667		0	164047	1902	chromosome 19 open reading frame 18	gene	biological_process-&-1&-GO:0008150-&&-biological_process|cellular_component-&-1&-GO:0016021-&&-integral component of membrane-%%-GO:0070062-&&-extracellular exosome|molecular_function-&-1&-GO:0003674-&&-molecular_function	G:9606:C19orf18		FALSE		C19orf18	Homo sapiens (Human)-&&-9606	Gene Symbol-&-1&-C19orf18		0.361446	0	1	4		FALSE		C19orf18	C19orf18	2132		0	1	0	0.705556	FALSE	0	C19orf18	0		0
596790	taxon:9606	2.72474		4.6e-07	180429	1902	G protein-coupled receptor 12	gene	biological_process-&-1&-GO:0006874-&&-cellular calcium ion homeostasis-%%-GO:0007186-&&-G-protein coupled receptor signaling pathway|cellular_component-&-1&-GO:0005887-&&-integral component of plasma membrane|molecular_function-&-1&-GO:0004930-&&-G-protein coupled receptor activity-%%-GO:0031210-&&-phosphatidylcholine binding	G:9606:GPR12		FALSE		GPR12	Homo sapiens (Human)-&&-9606	Gene Symbol-&-1&-GPR12		0.367007	0	2	4		FALSE		GPR12	GPR12	1203		0	2	0	0.712543	FALSE	0	GPR12	3576		0.514335
596791	taxon:9606	2.91115		2.548e-05	180438	1902	C-C motif chemokine receptor 10	gene	biological_process-&-1&-GO:0006935-&&-chemotaxis-%%-GO:0070098-&&-chemokine-mediated signaling pathway-%%-GO:0007204-&&-positive regulation of cytosolic calcium ion concentration-%%-GO:0007186-&&-G-protein coupled receptor signaling pathway-%%-GO:0006955-&&-immune response|cellular_component-&-1&-GO:0009986-&&-cell surface-%%-GO:0005886-&&-plasma membrane-%%-GO:0005887-&&-integral component of pl…	G:9606:CCR10		FALSE	KEGG-&-1&-hsa04672-&&-Intestinal immune network for IgA production-%%-hsa04062-&&-Chemokine signaling pathway-%%-hsa04060-&&-Cytokine-cytokine receptor interaction	CCR10	Homo sapiens (Human)-&&-9606	Gene Symbol-&-1&-CCR10		0.343506	0.142857	8	4		FALSE		CCR10	CCR10	169.25		0	8	0	0.681474	FALSE	0	CCR10	23440		0.180096
596792	taxon:9606	2.9809		2.79e-06	180442	1902	glycosylphosphatidylinositol specific phospholipase D1	gene	biological_process-&-1&-GO:0010867-&&-positive regulation of triglyceride biosynthetic process-%%-GO:0001503-&&-ossification-%%-GO:0035690-&&-cellular response to drug-%%-GO:0010595-&&-positive regulation of endothelial cell migration-%%-GO:0010907-&&-positive regulation of glucose metabolic process-%%-GO:0010897-&&-negative regulation of triglyceride catabolic process-%%-GO:0002430-&&-complement…	G:9606:GPLD1		FALSE	KEGG-&-1&-hsa01100-&&-Metabolic pathways-%%-hsa00563-&&-Glycosylphosphatidylinositol (GPI)-anchor biosynthesis	GPLD1	Homo sapiens (Human)-&&-9606	Gene Symbol-&-1&-GPLD1		0.335469	0.2	6	5		FALSE		GPLD1	GPLD1	118		0	6	0	0.66985	FALSE	0	GPLD1	3978		0.188
596793	taxon:9606	2.61974		8.811e-05	180443	1902	glucose-6-phosphate isomerase	gene	biological_process-&-1&-GO:0001707-&&-mesoderm formation-%%-GO:0007611-&&-learning or memory-%%-GO:0043524-&&-negative regulation of neuron apoptotic process-%%-GO:0033574-&&-response to testosterone-%%-GO:0001525-&&-angiogenesis-%%-GO:0061621-&&-canonical glycolysis-%%-GO:0006959-&&-humoral immune response-%%-GO:0042593-&&-glucose homeostasis-%%-GO:0043278-&&-response to morphine-%%-GO:0032355-&…	G:9606:GPI		FALSE	KEGG-&-1&-hsa00010-&&-Glycolysis / Gluconeogenesis-%%-hsa00520-&&-Amino sugar and nucleotide sugar metabolism-%%-hsa00030-&&-Pentose phosphate pathway-%%-hsa01200-&&-Carbon metabolism-%%-hsa01100-&&-Metabolic pathways-%%-hsa00500-&&-Starch and sucrose metabolism	GPI	Homo sapiens (Human)-&&-9606	Gene Symbol-&-1&-GPI		0.381717	0.173016	38	4		FALSE		GPI	GPI	185.556		0	37	0	0.730043	FALSE	1	GPI	182692		0.0618056
596794	taxon:9606	2.89103		3.07e-06	180440	1902	glycoprotein M6B	gene	biological_process-&-1&-GO:0085029-&&-extracellular matrix assembly-%%-GO:0007399-&&-nervous system development-%%-GO:0015031-&&-protein transport-%%-GO:2000009-&&-negative regulation of protein localization to cell surface-%%-GO:0032956-&&-regulation of actin cytoskeleton organization-%%-GO:0030501-&&-positive regulation of bone mineralization-%%-GO:0001503-&&-ossification-%%-GO:0030154-&&-cell …	G:9606:GPM6B		FALSE		GPM6B	Homo sapiens (Human)-&&-9606	Gene Symbol-&-1&-GPM6B		0.345898	0	8	4		FALSE		GPM6B	GPM6B	170.125		0	8	0	0.684829	FALSE	0	GPM6B	8828		0.149801
596795	taxon:9606	2.70885		4.891e-05	180446	1902	glypican 1	gene	biological_process-&-1&-GO:2001016-&&-positive regulation of skeletal muscle cell differentiation-%%-GO:0050900-&&-leukocyte migration-%%-GO:0032288-&&-myelin assembly-%%-GO:0006027-&&-glycosaminoglycan catabolic process-%%-GO:0006024-&&-glycosaminoglycan biosynthetic process-%%-GO:0014037-&&-Schwann cell differentiation-%%-GO:0030200-&&-heparan sulfate proteoglycan catabolic process-%%-GO:000741…	G:9606:GPC1		FALSE	KEGG-&-1&-hsa05418-&&-Fluid shear stress and atherosclerosis-%%-hsa05205-&&-Proteoglycans in cancer	GPC1	Homo sapiens (Human)-&&-9606	Gene Symbol-&-1&-GPC1		0.369161	0	9	4		FALSE		GPC1	GPC1	281.667		0	9	0	0.715192	FALSE	0	GPC1	47444		0.115882
596796	taxon:9606	2.83346		4.01e-06	180450	1902	inhibitor of DNA binding 4, HLH protein	gene	biological_process-&-1&-GO:0008284-&&-positive regulation of cell proliferation-%%-GO:0000082-&&-G1/S transition of mitotic cell cycle-%%-GO:0021766-&&-hippocampus development-%%-GO:0048715-&&-negative regulation of oligodendrocyte differentiation-%%-GO:0045892-&&-negative regulation of transcription, DNA-templated-%%-GO:0034613-&&-cellular protein localization-%%-GO:0000122-&&-negative regulatio…	G:9606:ID4		FALSE	KEGG-&-1&-hsa04350-&&-TGF-beta signaling pathway-%%-hsa04550-&&-Signaling pathways regulating pluripotency of stem cells	ID4	Homo sapiens (Human)-&&-9606	Gene Symbol-&-1&-ID4		0.352925	0.363636	11	4		FALSE		ID4	ID4	226.364		0	11	0	0.694423	FALSE	0	ID4	10858		0.160884
596797	taxon:9606	2.72949		3.351e-05	180451	1902	inhibitor of DNA binding 3, HLH protein	gene	biological_process-&-1&-GO:0030903-&&-notochord development-%%-GO:0045662-&&-negative regulation of myoblast differentiation-%%-GO:0007507-&&-heart development-%%-GO:0007517-&&-muscle organ development-%%-GO:0045892-&&-negative regulation of transcription, DNA-templated-%%-GO:0009611-&&-response to wounding-%%-GO:0000122-&&-negative regulation of transcription from RNA polymerase II promoter-%%-G…	G:9606:ID3		FALSE	KEGG-&-1&-hsa04350-&&-TGF-beta signaling pathway-%%-hsa04550-&&-Signaling pathways regulating pluripotency of stem cells	ID3	Homo sapiens (Human)-&&-9606	Gene Symbol-&-1&-ID3		0.366369	0.0662879	35	4		FALSE		ID3	ID3	101.515		0	34	0	0.711752	FALSE	1	ID3	67996		0.0468638
596798	taxon:9606	2.41038	217.491	0.00080684	180454	1902	mitochondrial ribosomal protein L58	gene	biological_process-&-1&-GO:0070125-&&-mitochondrial translational elongation-%%-GO:0070126-&&-mitochondrial translational termination|cellular_component-&-1&-GO:0005762-&&-mitochondrial large ribosomal subunit-%%-GO:0005759-&&-mitochondrial matrix-%%-GO:0005739-&&-mitochondrion-%%-GO:0005743-&&-mitochondrial inner membrane|molecular_function-&-1&-GO:0016150-&&-translation release factor activity,…	G:9606:MRPL58		FALSE		MRPL58	Homo sapiens (Human)-&&-9606	Gene Symbol-&-1&-MRPL58	0.470107	0.414872	0.0589266	166	4	0.0116994	FALSE	8.375	MRPL58	MRPL58	83.5361	8.84896	0	166	0	0.764936	FALSE	0	MRPL58	1245486	Infinity	0.0187629
596799	taxon:9606	2.74667		7.01e-06	180455	1902	interferon regulatory factor 8	gene	biological_process-&-1&-GO:0032729-&&-positive regulation of interferon-gamma production-%%-GO:0042832-&&-defense response to protozoan-%%-GO:0071346-&&-cellular response to interferon-gamma-%%-GO:0060261-&&-positive regulation of transcription initiation from RNA polymerase II promoter-%%-GO:0030099-&&-myeloid cell differentiation-%%-GO:0032735-&&-positive regulation of interleukin-12 production…	G:9606:IRF8		FALSE	KEGG-&-1&-hsa05133-&&-Pertussis	IRF8	Homo sapiens (Human)-&&-9606	Gene Symbol-&-1&-IRF8		0.364078	0.157143	23	4		FALSE		IRF8	IRF8	162.571		0	22	0	0.708889	FALSE	1	IRF8	23894		0.0798017
596800	taxon:9606	2.57103		0.00011302	180452	1902	inhibitor of DNA binding 2, HLH protein	gene	biological_process-&-1&-GO:0045777-&&-positive regulation of blood pressure-%%-GO:0048541-&&-Peyer's patch development-%%-GO:0060749-&&-mammary gland alveolus development-%%-GO:0045578-&&-negative regulation of B cell differentiation-%%-GO:0045892-&&-negative regulation of transcription, DNA-templated-%%-GO:0045600-&&-positive regulation of fat cell differentiation-%%-GO:0000122-&&-negative regul…	G:9606:ID2		FALSE	KEGG-&-1&-hsa05202-&&-Transcriptional misregulation in cancer-%%-hsa04390-&&-Hippo signaling pathway-%%-hsa04350-&&-TGF-beta signaling pathway-%%-hsa04550-&&-Signaling pathways regulating pluripotency of stem cells	ID2	Homo sapiens (Human)-&&-9606	Gene Symbol-&-1&-ID2		0.38895	0.0655738	64	4		FALSE		ID2	ID2	129		0	63	0	0.738162	FALSE	1	ID2	254524		0.0387562
596801	taxon:9606	2.69346		4.816e-05	180453	1902	inhibitor of DNA binding 1, HLH protein	gene	biological_process-&-1&-GO:1901653-&&-cellular response to peptide-%%-GO:0007507-&&-heart development-%%-GO:0045892-&&-negative regulation of transcription, DNA-templated-%%-GO:0000122-&&-negative regulation of transcription from RNA polymerase II promoter-%%-GO:0030509-&&-BMP signaling pathway-%%-GO:0045668-&&-negative regulation of osteoblast differentiation-%%-GO:0010628-&&-positive regulation…	G:9606:ID1		FALSE	KEGG-&-1&-hsa04390-&&-Hippo signaling pathway-%%-hsa04350-&&-TGF-beta signaling pathway-%%-hsa04015-&&-Rap1 signaling pathway-%%-hsa04550-&&-Signaling pathways regulating pluripotency of stem cells	ID1	Homo sapiens (Human)-&&-9606	Gene Symbol-&-1&-ID1		0.371269	0.0371795	40	4		FALSE		ID1	ID1	95.2		0	40	0	0.717756	FALSE	0	ID1	93248		0.039539
596802	taxon:9606	2.48641	814.305	0.00068581	180462	1902	intercellular adhesion molecule 1	gene	biological_process-&-1&-GO:0051092-&&-positive regulation of NF-kappaB transcription factor activity-%%-GO:0097368-&&-establishment of Sertoli cell barrier-%%-GO:0030198-&&-extracellular matrix organization-%%-GO:0071312-&&-cellular response to alkaloid-%%-GO:0046813-&&-receptor-mediated virion attachment to host cell-%%-GO:0090557-&&-establishment of endothelial intestinal barrier-%%-GO:0010477-…	G:9606:ICAM1	ICAM1	TRUE	KEGG-&-1&-hsa05416-&&-Viral myocarditis-%%-hsa04514-&&-Cell adhesion molecules (CAMs)-%%-hsa05418-&&-Fluid shear stress and atherosclerosis-%%-hsa05150-&&-Staphylococcus aureus infection-%%-hsa05323-&&-Rheumatoid arthritis-%%-hsa05167-&&-Kaposi sarcoma-associated herpesvirus infection-%%-hsa04933-&&-AGE-RAGE signaling pathway in diabetic complications-%%-hsa04064-&&-NF-kappa B signaling pathway-%…	ICAM1	Homo sapiens (Human)-&&-9606	Gene Symbol-&-1&-ICAM1	0.503622	0.402186	0.147679	161	4	0.0368461	FALSE	30.5294	ICAM1	ICAM1	154.528	33.0816	0	160	0	0.752265	FALSE	1	ICAM1	2533412	Infinity	0.0401078
596803	taxon:9606	2.92385		7.1e-06	180463	1902	islet cell autoantigen 1	gene	biological_process-&-1&-GO:0006836-&&-neurotransmitter transport-%%-GO:0050796-&&-regulation of insulin secretion|cellular_component-&-1&-GO:0030667-&&-secretory granule membrane-%%-GO:0005737-&&-cytoplasm-%%-GO:0030672-&&-synaptic vesicle membrane-%%-GO:0000139-&&-Golgi membrane-%%-GO:0005829-&&-cytosol-%%-GO:0030054-&&-cell junction-%%-GO:0043231-&&-intracellular membrane-bounded organelle|mole…	G:9606:ICA1		FALSE	KEGG-&-1&-hsa04940-&&-Type I diabetes mellitus	ICA1	Homo sapiens (Human)-&&-9606	Gene Symbol-&-1&-ICA1		0.342015	0.0545455	11	4		FALSE		ICA1	ICA1	95.5455		0	11	0	0.679359	FALSE	0	ICA1	10058		0.102041
596804	taxon:9606	2.67808		6.915e-05	180460	1902	intercellular adhesion molecule 3	gene	biological_process-&-1&-GO:0007155-&&-cell adhesion-%%-GO:0030198-&&-extracellular matrix organization-%%-GO:0016337-&&-single organismal cell-cell adhesion-%%-GO:0050776-&&-regulation of immune response-%%-GO:0002223-&&-stimulatory C-type lectin receptor signaling pathway-%%-GO:0006909-&&-phagocytosis|cellular_component-&-1&-GO:0070062-&&-extracellular exosome-%%-GO:0005886-&&-plasma membrane-%%…	G:9606:ICAM3		FALSE	KEGG-&-1&-hsa04514-&&-Cell adhesion molecules (CAMs)	ICAM3	Homo sapiens (Human)-&&-9606	Gene Symbol-&-1&-ICAM3		0.373402	0.111111	10	4		FALSE		ICAM3	ICAM3	289.3		0	10	0	0.720321	FALSE	0	ICAM3	50828		0.110983
596805	taxon:9606	2.22769	652.623	0.00020202	180466	1902	isoleucyl-tRNA synthetase	gene	biological_process-&-1&-GO:0006428-&&-isoleucyl-tRNA aminoacylation-%%-GO:0006418-&&-tRNA aminoacylation for protein translation-%%-GO:0001649-&&-osteoblast differentiation-%%-GO:0006450-&&-regulation of translational fidelity|cellular_component-&-1&-GO:0005829-&&-cytosol-%%-GO:0070062-&&-extracellular exosome-%%-GO:0005737-&&-cytoplasm-%%-GO:0016020-&&-membrane|molecular_function-&-1&-GO:0002161…	G:9606:IARS		FALSE	KEGG-&-1&-hsa00970-&&-Aminoacyl-tRNA biosynthesis	IARS	Homo sapiens (Human)-&&-9606	Gene Symbol-&-1&-IARS	0.508664	0.448895	0.155207	95	4	0.0195933	FALSE	14.0435	IARS	IARS	233.074	15.0712	0	95	0	0.795385	FALSE	0	IARS	698058	Infinity	0.0392446
596806	taxon:9606	2.60205		2.616e-05	164083	1902	essential meiotic structure-specific endonuclease 1	gene	biological_process-&-1&-GO:0031297-&&-replication fork processing-%%-GO:0072429-&&-response to intra-S DNA damage checkpoint signaling-%%-GO:0036297-&&-interstrand cross-link repair-%%-GO:0000712-&&-resolution of meiotic recombination intermediates-%%-GO:0006302-&&-double-strand break repair-%%-GO:0031573-&&-intra-S DNA damage checkpoint-%%-GO:0090305-&&-nucleic acid phosphodiester bond hydrolysi…	G:9606:EME1		FALSE	KEGG-&-1&-hsa03440-&&-Homologous recombination-%%-hsa03460-&&-Fanconi anemia pathway	EME1	Homo sapiens (Human)-&&-9606	Gene Symbol-&-1&-EME1		0.384312	0.110526	20	4		FALSE		EME1	EME1	236.45		0	20	0	0.732991	FALSE	0	EME1	71694		0.0748258
596807	taxon:9606	2.82308		2.9e-06	180469	1902	tenascin C	gene	biological_process-&-1&-GO:0007528-&&-neuromuscular junction development-%%-GO:0008284-&&-positive regulation of cell proliferation-%%-GO:0071774-&&-response to fibroblast growth factor-%%-GO:0060739-&&-mesenchymal-epithelial cell signaling involved in prostate gland development-%%-GO:0007162-&&-negative regulation of cell adhesion-%%-GO:0071300-&&-cellular response to retinoic acid-%%-GO:0030198…	G:9606:TNC		FALSE	KEGG-&-1&-hsa05206-&&-MicroRNAs in cancer-%%-hsa04510-&&-Focal adhesion-%%-hsa05165-&&-Human papillomavirus infection-%%-hsa04151-&&-PI3K-Akt signaling pathway-%%-hsa04512-&&-ECM-receptor interaction	TNC	Homo sapiens (Human)-&&-9606	Gene Symbol-&-1&-TNC		0.354223	0.5	5	4		FALSE		TNC	TNC	345.8		0	5	0	0.696154	FALSE	0	TNC	3578		0.224109
596808	taxon:9606	2.77744		1.683e-05	180474	1902	5-hydroxytryptamine receptor 6	gene	biological_process-&-1&-GO:0098664-&&-G-protein coupled serotonin receptor signaling pathway-%%-GO:0007268-&&-chemical synaptic transmission-%%-GO:0032008-&&-positive regulation of TOR signaling-%%-GO:0007187-&&-G-protein coupled receptor signaling pathway, coupled to cyclic nucleotide second messenger-%%-GO:0021795-&&-cerebral cortex cell migration|cellular_component-&-1&-GO:0005886-&&-plasma me…	G:9606:HTR6		FALSE	KEGG-&-1&-hsa04726-&&-Serotonergic synapse-%%-hsa04024-&&-cAMP signaling pathway-%%-hsa04020-&&-Calcium signaling pathway-%%-hsa04080-&&-Neuroactive ligand-receptor interaction	HTR6	Homo sapiens (Human)-&&-9606	Gene Symbol-&-1&-HTR6		0.360044	0.0615385	26	4		FALSE		HTR6	HTR6	98.4231		0	26	0	0.703761	FALSE	0	HTR6	33730		0.0545139
596809	taxon:9606	2.85154		1.17e-06	164088	1902	unc-45 myosin chaperone B	gene	biological_process-&-1&-GO:0007517-&&-muscle organ development-%%-GO:0002088-&&-lens development in camera-type eye-%%-GO:0030154-&&-cell differentiation-%%-GO:0061077-&&-chaperone-mediated protein folding|cellular_component-&-1&-GO:0005829-&&-cytosol|molecular_function-&-1&-GO:0051879-&&-Hsp90 protein binding-%%-GO:0005515-&&-protein binding	G:9606:UNC45B		FALSE		UNC45B	Homo sapiens (Human)-&&-9606	Gene Symbol-&-1&-UNC45B		0.350688	0.285714	7	4		FALSE		UNC45B	UNC45B	296.286		0	7	0	0.69141	FALSE	0	UNC45B	3636		0.227692
596810	taxon:9606	2.76667		0	164092	1902	outer dense fiber of sperm tails 4	gene	biological_process-&-1&-GO:0007283-&&-spermatogenesis-%%-GO:0030154-&&-cell differentiation-%%-GO:0007275-&&-multicellular organism development|cellular_component-&-1&-GO:0016021-&&-integral component of membrane-%%-GO:0001520-&&-outer dense fiber	G:9606:ODF4		FALSE		ODF4	Homo sapiens (Human)-&&-9606	Gene Symbol-&-1&-ODF4		0.361446	0	1	4		FALSE		ODF4	ODF4	2132		0	1	0	0.705556	FALSE	0	ODF4	0		0
596811	taxon:9606	3.05603		2e-08	180477	1902	5-hydroxytryptamine receptor 3A	gene	biological_process-&-1&-GO:0098664-&&-G-protein coupled serotonin receptor signaling pathway-%%-GO:0071363-&&-cellular response to growth factor stimulus-%%-GO:0007210-&&-serotonin receptor signaling pathway-%%-GO:0045471-&&-response to ethanol-%%-GO:0098655-&&-cation transmembrane transport-%%-GO:0034220-&&-ion transmembrane transport-%%-GO:0032414-&&-positive regulation of ion transmembrane tra…	G:9606:HTR3A	HTR3A	TRUE	KEGG-&-1&-hsa04726-&&-Serotonergic synapse-%%-hsa04742-&&-Taste transduction	HTR3A	Homo sapiens (Human)-&&-9606	Gene Symbol-&-1&-HTR3A		0.327222	0	2	4		FALSE		HTR3A	HTR3A	298.5		0	2	0	0.657329	FALSE	0	HTR3A	180		0.551948
596812	taxon:9606	2.70397		2.19e-06	164098	1902	coiled-coil domain containing 50	gene	biological_process-&-1&-GO:0007605-&&-sensory perception of sound|cellular_component-&-1&-GO:0005829-&&-cytosol|molecular_function-&-1&-GO:0031625-&&-ubiquitin protein ligase binding-%%-GO:0005515-&&-protein binding	G:9606:CCDC50		FALSE		CCDC50	Homo sapiens (Human)-&&-9606	Gene Symbol-&-1&-CCDC50		0.369826	0.212121	12	4		FALSE		CCDC50	CCDC50	287.083		0	12	0	0.716004	FALSE	0	CCDC50	7696		0.121472
596813	taxon:9606	2.55141	360.891	0.00021218	164096	1902	spindle and centriole associated protein 1	gene	biological_process-&-1&-GO:0090307-&&-mitotic spindle assembly-%%-GO:0046599-&&-regulation of centriole replication-%%-GO:0051301-&&-cell division-%%-GO:0051310-&&-metaphase plate congression|cellular_component-&-1&-GO:0005814-&&-centriole-%%-GO:0005819-&&-spindle-%%-GO:0005813-&&-centrosome|molecular_function-&-1&-GO:0005515-&&-protein binding	G:9606:SPICE1		FALSE		SPICE1	Homo sapiens (Human)-&&-9606	Gene Symbol-&-1&-SPICE1	0.463346	0.39194	0.0685883	98	4	0.00530928	FALSE	6.18421	SPICE1	SPICE1	86.2755	6.44252	0	98	0	0.741432	FALSE	0	SPICE1	426166	Infinity	0.0249689
596814	taxon:9606	2.87846		1.138e-05	180480	1902	5-hydroxytryptamine receptor 2A	gene	biological_process-&-1&-GO:0006874-&&-cellular calcium ion homeostasis-%%-GO:0050731-&&-positive regulation of peptidyl-tyrosine phosphorylation-%%-GO:0045600-&&-positive regulation of fat cell differentiation-%%-GO:0014065-&&-phosphatidylinositol 3-kinase signaling-%%-GO:0030431-&&-sleep-%%-GO:0051209-&&-release of sequestered calcium ion into cytosol-%%-GO:0008219-&&-cell death-%%-GO:0050795-&&…	G:9606:HTR2A	HTR2A	TRUE	KEGG-&-1&-hsa04726-&&-Serotonergic synapse-%%-hsa04020-&&-Calcium signaling pathway-%%-hsa04750-&&-Inflammatory mediator regulation of TRP channels-%%-hsa04080-&&-Neuroactive ligand-receptor interaction-%%-hsa04540-&&-Gap junction	HTR2A	Homo sapiens (Human)-&&-9606	Gene Symbol-&-1&-HTR2A		0.347408	0.0196078	18	4		FALSE		HTR2A	HTR2A	82.3333		0	18	0	0.686923	FALSE	0	HTR2A	18466		0.074753
596815	taxon:9606	3.22769		4.98e-06	180484	1902	5-hydroxytryptamine receptor 1B	gene	biological_process-&-1&-GO:0007268-&&-chemical synaptic transmission-%%-GO:0035690-&&-cellular response to drug-%%-GO:0071312-&&-cellular response to alkaloid-%%-GO:0030818-&&-negative regulation of cAMP biosynthetic process-%%-GO:0002031-&&-G-protein coupled receptor internalization-%%-GO:0042756-&&-drinking behavior-%%-GO:0007198-&&-adenylate cyclase-inhibiting serotonin receptor signaling path…	G:9606:HTR1B	HTR1B	TRUE	KEGG-&-1&-hsa04726-&&-Serotonergic synapse-%%-hsa04024-&&-cAMP signaling pathway-%%-hsa04080-&&-Neuroactive ligand-receptor interaction-%%-hsa04742-&&-Taste transduction	HTR1B	Homo sapiens (Human)-&&-9606	Gene Symbol-&-1&-HTR1B		0.309819	0.0666667	8	5		FALSE		HTR1B	HTR1B	74.1667		0	7	0	0.628718	FALSE	1	HTR1B	4930		0.228972
596816	taxon:9606	3.05962		8e-08	164100	1902	NIMA related kinase 10	gene	biological_process-&-1&-GO:0043406-&&-positive regulation of MAP kinase activity-%%-GO:0070372-&&-regulation of ERK1 and ERK2 cascade-%%-GO:1902749-&&-regulation of cell cycle G2/M phase transition-%%-GO:0006468-&&-protein phosphorylation-%%-GO:0031954-&&-positive regulation of protein autophosphorylation|cellular_component-&-1&-GO:1902911-&&-protein kinase complex|molecular_function-&-1&-GO:0004…	G:9606:NEK10		FALSE		NEK10	Homo sapiens (Human)-&&-9606	Gene Symbol-&-1&-NEK10		0.326838	0	2	5		FALSE		NEK10	NEK10	315		0	2	0	0.656731	FALSE	0	NEK10	496		0.523333
596817	taxon:9606	3.07705		4.44e-06	180485	1902	ptamine receptor 1A	gene	biological_process-&-1&-GO:0007210-&&-serotonin receptor signaling pathway-%%-GO:0008284-&&-positive regulation of cell proliferation-%%-GO:0046883-&&-regulation of hormone secretion-%%-GO:0008283-&&-cell proliferation-%%-GO:0042310-&&-vasoconstriction-%%-GO:0001662-&&-behavioral fear response-%%-GO:0042053-&&-regulation of dopamine metabolic process-%%-GO:0007198-&&-adenylate cyclase-inhibiting …	G:9606:HTR1A	HTR1A	TRUE	KEGG-&-1&-hsa04726-&&-Serotonergic synapse-%%-hsa04024-&&-cAMP signaling pathway-%%-hsa04080-&&-Neuroactive ligand-receptor interaction-%%-hsa04742-&&-Taste transduction	HTR1A	Homo sapiens (Human)-&&-9606	Gene Symbol-&-1&-HTR1A		0.324986	0.1	7	4		FALSE		HTR1A	HTR1A	59		0	6	0	0.653825	FALSE	1	HTR1A	7920		0.205634
596818	taxon:9606	2.81949		4.57e-06	164110	1902	ring finger protein 38	gene	biological_process-&-1&-GO:0008584-&&-male gonad development-%%-GO:0016567-&&-protein ubiquitination-%%-GO:0043161-&&-proteasome-mediated ubiquitin-dependent protein catabolic process|cellular_component-&-1&-GO:0005634-&&-nucleus-%%-GO:0005654-&&-nucleoplasm-%%-GO:0036126-&&-sperm flagellum|molecular_function-&-1&-GO:0008270-&&-zinc ion binding-%%-GO:0061630-&&-ubiquitin protein ligase activity-%…	G:9606:RNF38		FALSE		RNF38	Homo sapiens (Human)-&&-9606	Gene Symbol-&-1&-RNF38		0.354674	0.24359	15	4		FALSE		RNF38	RNF38	220.308		0	14	0	0.696752	FALSE	1	RNF38	14942		0.121498
596819	taxon:9606	2.49013		0.00026149	180494	1902	heparan sulfate proteoglycan 2	gene	biological_process-&-1&-GO:0030198-&&-extracellular matrix organization-%%-GO:0030203-&&-glycosaminoglycan metabolic process-%%-GO:0022617-&&-extracellular matrix disassembly-%%-GO:0001523-&&-retinoid metabolic process-%%-GO:0006027-&&-glycosaminoglycan catabolic process-%%-GO:0006024-&&-glycosaminoglycan biosynthetic process-%%-GO:0001525-&&-angiogenesis-%%-GO:0044267-&&-cellular protein metabol…	G:9606:HSPG2		FALSE	KEGG-&-1&-hsa05205-&&-Proteoglycans in cancer-%%-hsa05161-&&-Hepatitis B-%%-hsa04512-&&-ECM-receptor interaction	HSPG2	Homo sapiens (Human)-&&-9606	Gene Symbol-&-1&-HSPG2		0.401586	0.0745968	32	4		FALSE		HSPG2	HSPG2	184.781		0	32	0	0.751645	FALSE	0	HSPG2	340904		0.0465753
596820	taxon:9606	2.62128		2.33e-06	180495	1902	DnaJ heat shock protein family (Hsp40) member C4	gene	biological_process-&-1&-GO:0006457-&&-protein folding-%%-GO:0006986-&&-response to unfolded protein|cellular_component-&-1&-GO:0016020-&&-membrane-%%-GO:0016021-&&-integral component of membrane|molecular_function-&-1&-GO:0051082-&&-unfolded protein binding-%%-GO:0005515-&&-protein binding	G:9606:DNAJC4		FALSE		DNAJC4	Homo sapiens (Human)-&&-9606	Gene Symbol-&-1&-DNAJC4		0.381493	0.333333	4	4		FALSE		DNAJC4	DNAJC4	841		0	4	0	0.729786	FALSE	0	DNAJC4	11352		0.276018
596821	taxon:9606	2.08538	3807.06	0.00204998	180499	1902	heat shock protein family D (Hsp60) member 1	gene	biological_process-&-1&-GO:0051604-&&-protein maturation-%%-GO:0002368-&&-B cell cytokine production-%%-GO:0043032-&&-positive regulation of macrophage activation-%%-GO:0043627-&&-response to estrogen-%%-GO:0016032-&&-viral process-%%-GO:0050870-&&-positive regulation of T cell activation-%%-GO:0006458-&&-'de novo' protein folding-%%-GO:0002931-&&-response to ischemia-%%-GO:0032727-&&-positive re…	G:9606:HSPD1	HSPD1	TRUE	KEGG-&-1&-hsa05152-&&-Tuberculosis-%%-hsa03018-&&-RNA degradation-%%-hsa04940-&&-Type I diabetes mellitus-%%-hsa05134-&&-Legionellosis	HSPD1	Homo sapiens (Human)-&&-9606	Gene Symbol-&-1&-HSPD1	0.526085	0.479528	0.0886878	223	4	0.0407038	FALSE	28.6115	HSPD1	HSPD1	203.086	35.5792	0	222	0	0.819103	FALSE	1	HSPD1	5130346	Infinity	0.0293784
596822	taxon:9606	2.23487	394.579	0.00028951	180496	1902	DnaJ heat shock protein family (Hsp40) member B1	gene	biological_process-&-1&-GO:0051085-&&-chaperone mediated protein folding requiring cofactor-%%-GO:0032781-&&-positive regulation of ATPase activity-%%-GO:0090084-&&-negative regulation of inclusion body assembly-%%-GO:0006986-&&-response to unfolded protein-%%-GO:0097201-&&-negative regulation of transcription from RNA polymerase II promoter in response to stress-%%-GO:1900034-&&-regulation of ce…	G:9606:DNAJB1		FALSE	KEGG-&-1&-hsa05164-&&-Influenza A-%%-hsa04141-&&-Protein processing in endoplasmic reticulum	DNAJB1	Homo sapiens (Human)-&&-9606	Gene Symbol-&-1&-DNAJB1	0.501138	0.447453	0.127171	85	4	0.0127988	FALSE	12.4423	DNAJB1	DNAJB1	209.647	12.9484	0	85	0	0.794188	FALSE	0	DNAJB1	753540	Infinity	0.0356139
596823	taxon:9606	2.43564	581.454	0.00046848	180497	1902	heat shock protein family E (Hsp10) member 1	gene	biological_process-&-1&-GO:0006457-&&-protein folding-%%-GO:0001649-&&-osteoblast differentiation-%%-GO:0006919-&&-activation of cysteine-type endopeptidase activity involved in apoptotic process-%%-GO:0006986-&&-response to unfolded protein-%%-GO:0051085-&&-chaperone mediated protein folding requiring cofactor|cellular_component-&-1&-GO:0070062-&&-extracellular exosome-%%-GO:0005739-&&-mitochond…	G:9606:HSPE1		FALSE		HSPE1	Homo sapiens (Human)-&&-9606	Gene Symbol-&-1&-HSPE1	0.497177	0.41057	0.0999565	118	4	0.0129416	FALSE	12.8033	HSPE1	HSPE1	132.534	13.5847	0	118	0	0.760726	FALSE	0	HSPE1	1033780	Infinity	0.0307964
596824	taxon:9606	2.82987		3.97e-06	180500	1902	heat shock protein 90 alpha family class B member 3, pseudogene	gene	biological_process-&-1&-GO:0006457-&&-protein folding-%%-GO:0006950-&&-response to stress-%%-GO:0008150-&&-biological_process|cellular_component-&-1&-GO:0005737-&&-cytoplasm-%%-GO:0070062-&&-extracellular exosome|molecular_function-&-1&-GO:0005524-&&-ATP binding-%%-GO:0003674-&&-molecular_function-%%-GO:0051082-&&-unfolded protein binding	G:9606:HSP90AB3P		FALSE		HSP90AB3P	Homo sapiens (Human)-&&-9606	Gene Symbol-&-1&-HSP90AB3P		0.353373	0.171429	15	4		FALSE		HSP90AB3P	HSP90AB3P	126.8		0	15	0	0.695021	FALSE	0	HSP90AB3P	8990		0.0872819
596825	taxon:9606	2.03295	10591.3	0.0142753	180501	1902	heat shock protein 90 alpha family class B member 1	gene	biological_process-&-1&-GO:0045597-&&-positive regulation of cell differentiation-%%-GO:0060334-&&-regulation of interferon-gamma-mediated signaling pathway-%%-GO:0006986-&&-response to unfolded protein-%%-GO:0097435-&&-supramolecular fiber organization-%%-GO:1903660-&&-negative regulation of complement-dependent cytotoxicity-%%-GO:0001890-&&-placenta development-%%-GO:0043312-&&-neutrophil degra…	G:9606:HSP90AB1	HSP90AB1	TRUE	KEGG-&-1&-hsa04612-&&-Antigen processing and presentation-%%-hsa04657-&&-IL-17 signaling pathway-%%-hsa05418-&&-Fluid shear stress and atherosclerosis-%%-hsa05215-&&-Prostate cancer-%%-hsa04915-&&-Estrogen signaling pathway-%%-hsa04141-&&-Protein processing in endoplasmic reticulum-%%-hsa04621-&&-NOD-like receptor signaling pathway-%%-hsa04659-&&-Th17 cell differentiation-%%-hsa05200-&&-Pathways …	HSP90AB1	Homo sapiens (Human)-&&-9606	Gene Symbol-&-1&-HSP90AB1	0.557384	0.491896	0.0356925	648	3	0.0626405	FALSE	40.0256	HSP90AB1	HSP90AB1	106.232	96.5116	0	647	0	0.827842	FALSE	1	HSP90AB1	27550110	Infinity	0.0154027
596826	taxon:9606	1.93179	14577.7	0.0264869	180506	1902	heat shock protein 90 alpha family class A member 1	gene	biological_process-&-1&-GO:0038096-&&-Fc-gamma receptor signaling pathway involved in phagocytosis-%%-GO:0043254-&&-regulation of protein complex assembly-%%-GO:0006986-&&-response to unfolded protein-%%-GO:0050821-&&-protein stabilization-%%-GO:0009408-&&-response to heat-%%-GO:0043312-&&-neutrophil degranulation-%%-GO:0051973-&&-positive regulation of telomerase activity-%%-GO:0031396-&&-regula…	G:9606:HSP90AA1	HSP90AA1	TRUE	KEGG-&-1&-hsa04612-&&-Antigen processing and presentation-%%-hsa04657-&&-IL-17 signaling pathway-%%-hsa05418-&&-Fluid shear stress and atherosclerosis-%%-hsa05215-&&-Prostate cancer-%%-hsa04915-&&-Estrogen signaling pathway-%%-hsa04141-&&-Protein processing in endoplasmic reticulum-%%-hsa04621-&&-NOD-like receptor signaling pathway-%%-hsa04659-&&-Th17 cell differentiation-%%-hsa04217-&&-Necroptos…	HSP90AA1	Homo sapiens (Human)-&&-9606	Gene Symbol-&-1&-HSP90AA1	0.566467	0.517653	0.0301502	813	3	0.0669152	FALSE	42.8971	HSP90AA1	HSP90AA1	96.5906	122.767	0	812	0	0.844701	FALSE	1	HSP90AA1	42593056	Infinity	0.0128459
596827	taxon:9606	2.59115	181.611	0.00024717	180507	1902	heat shock protein family B (small) member 2	gene	biological_process-&-1&-GO:0009408-&&-response to heat-%%-GO:0006986-&&-response to unfolded protein-%%-GO:0043085-&&-positive regulation of catalytic activity|cellular_component-&-1&-GO:0005634-&&-nucleus-%%-GO:0005829-&&-cytosol-%%-GO:0005737-&&-cytoplasm|molecular_function-&-1&-GO:0008047-&&-enzyme activator activity-%%-GO:0005515-&&-protein binding	G:9606:HSPB2		FALSE	KEGG-&-1&-hsa05205-&&-Proteoglycans in cancer	HSPB2	Homo sapiens (Human)-&&-9606	Gene Symbol-&-1&-HSPB2	0.463346	0.385928	0.0396491	78	4	0.00588549	FALSE	6.18182	HSPB2	HSPB2	90.7368	6.39286	0	77	0	0.734808	FALSE	1	HSPB2	388588	Infinity	0.0288886
596828	taxon:9606	2.08115	1911.66	0.00121461	180510	1902	heat shock protein family A (Hsp70) member 9	gene	biological_process-&-1&-GO:0006457-&&-protein folding-%%-GO:0045647-&&-negative regulation of erythrocyte differentiation-%%-GO:0043066-&&-negative regulation of apoptotic process-%%-GO:0030218-&&-erythrocyte differentiation-%%-GO:1902037-&&-negative regulation of hematopoietic stem cell differentiation-%%-GO:0006611-&&-protein export from nucleus|cellular_component-&-1&-GO:0070062-&&-extracellul…	G:9606:HSPA9		FALSE	KEGG-&-1&-hsa05152-&&-Tuberculosis-%%-hsa03018-&&-RNA degradation	HSPA9	Homo sapiens (Human)-&&-9606	Gene Symbol-&-1&-HSPA9	0.529035	0.480503	0.103653	209	4	0.0405292	FALSE	25.7114	HSPA9	HSPA9	211.325	34.72	0	209	0	0.819808	FALSE	0	HSPA9	3560108	Infinity	0.0303702
596829	taxon:9606	2.01269	5617.82	0.00425426	180511	1902	heat shock protein family A (Hsp70) member 8	gene	biological_process-&-1&-GO:0045892-&&-negative regulation of transcription, DNA-templated-%%-GO:0006986-&&-response to unfolded protein-%%-GO:0061738-&&-late endosomal microautophagy-%%-GO:0043312-&&-neutrophil degranulation-%%-GO:0051726-&&-regulation of cell cycle-%%-GO:1902904-&&-negative regulation of supramolecular fiber organization-%%-GO:0006457-&&-protein folding-%%-GO:0043254-&&-regulati…	G:9606:HSPA8		FALSE	KEGG-&-1&-hsa04612-&&-Antigen processing and presentation-%%-hsa05162-&&-Measles-%%-hsa04915-&&-Estrogen signaling pathway-%%-hsa05145-&&-Toxoplasmosis-%%-hsa05164-&&-Influenza A-%%-hsa04010-&&-MAPK signaling pathway-%%-hsa04141-&&-Protein processing in endoplasmic reticulum-%%-hsa04213-&&-Longevity regulating pathway - multiple species-%%-hsa03040-&&-Spliceosome-%%-hsa04144-&&-Endocytosis-%%-hsa…	HSPA8	Homo sapiens (Human)-&&-9606	Gene Symbol-&-1&-HSPA8	0.548133	0.496847	0.0823825	380	4	0.0581103	FALSE	41.6255	HSPA8	HSPA8	166.587	80.7548	0	379	0	0.831218	FALSE	1	HSPA8	10476520	Infinity	0.0227478
596830	taxon:9606	2.12949	3401.15	0.0135194	180508	1902	heat shock protein family B (small) member 1	gene	biological_process-&-1&-GO:0001895-&&-retina homeostasis-%%-GO:0038033-&&-positive regulation of endothelial cell chemotaxis by VEGF-activated vascular endothelial growth factor receptor signaling pathway-%%-GO:0006446-&&-regulation of translational initiation-%%-GO:0006986-&&-response to unfolded protein-%%-GO:0006928-&&-movement of cell or subcellular component-%%-GO:0070527-&&-platelet aggrega…	G:9606:HSPB1	HSPB1	TRUE	KEGG-&-1&-hsa04010-&&-MAPK signaling pathway-%%-hsa04370-&&-VEGF signaling pathway-%%-hsa05146-&&-Amoebiasis	HSPB1	Homo sapiens (Human)-&&-9606	Gene Symbol-&-1&-HSPB1	0.527767	0.469597	0.0346778	417	4	0.0373487	FALSE	27.4091	HSPB1	HSPB1	108.684	39.2663	0	416	0	0.811752	FALSE	1	HSPB1	21646036	Infinity	0.0171631
596831	taxon:9606	2.08231	8461.33	0.0091149	180514	1902	heat shock protein family A (Hsp70) member 5	gene	biological_process-&-1&-GO:0010976-&&-positive regulation of neuron projection development-%%-GO:0006987-&&-activation of signaling protein activity involved in unfolded protein response-%%-GO:0030182-&&-neuron differentiation-%%-GO:0036498-&&-IRE1-mediated unfolded protein response-%%-GO:0051402-&&-neuron apoptotic process-%%-GO:0030335-&&-positive regulation of cell migration-%%-GO:0006983-&&-E…	G:9606:HSPA5	HSPA5	TRUE	KEGG-&-1&-hsa04612-&&-Antigen processing and presentation-%%-hsa05020-&&-Prion diseases-%%-hsa04918-&&-Thyroid hormone synthesis-%%-hsa04141-&&-Protein processing in endoplasmic reticulum-%%-hsa03060-&&-Protein export	HSPA5	Homo sapiens (Human)-&&-9606	Gene Symbol-&-1&-HSPA5	0.553878	0.480236	0.0678915	447	3	0.0660033	FALSE	44.0496	HSPA5	HSPA5	147.933	94.8614	0	446	0	0.819615	FALSE	1	HSPA5	16967630	Infinity	0.022084
596832	taxon:9606	2.72474		5.744e-05	164130	1902	shugoshin 1	gene	biological_process-&-1&-GO:0010457-&&-centriole-centriole cohesion-%%-GO:0045132-&&-meiotic chromosome segregation-%%-GO:0051301-&&-cell division-%%-GO:0007067-&&-mitotic nuclear division-%%-GO:0008608-&&-attachment of spindle microtubules to kinetochore-%%-GO:0007062-&&-sister chromatid cohesion-%%-GO:0007059-&&-chromosome segregation|cellular_component-&-1&-GO:0005829-&&-cytosol-%%-GO:0000922-&…	G:9606:SGO1		FALSE	KEGG-&-1&-hsa04114-&&-Oocyte meiosis	SGO1	Homo sapiens (Human)-&&-9606	Gene Symbol-&-1&-SGO1		0.367007	0.0833333	59	4		FALSE		SGO1	SGO1	104.667		0	58	0	0.712543	FALSE	1	SGO1	131098		0.0477507
596833	taxon:9606	2.04641	4187.52	0.00336594	180515	1902	heat shock protein family A (Hsp70) member 4	gene	biological_process-&-1&-GO:0006986-&&-response to unfolded protein-%%-GO:0045040-&&-protein import into mitochondrial outer membrane-%%-GO:0051131-&&-chaperone-mediated protein complex assembly|cellular_component-&-1&-GO:0070062-&&-extracellular exosome-%%-GO:0005829-&&-cytosol|molecular_function-&-1&-GO:0005524-&&-ATP binding-%%-GO:0005515-&&-protein binding	G:9606:HSPA4	HSPA4	TRUE	KEGG-&-1&-hsa04612-&&-Antigen processing and presentation-%%-hsa04530-&&-Tight junction	HSPA4	Homo sapiens (Human)-&&-9606	Gene Symbol-&-1&-HSPA4	0.534601	0.488661	0.0686789	308	4	0.0408767	FALSE	28.1543	HSPA4	HSPA4	159.14	45.9275	0	308	0	0.825598	FALSE	0	HSPA4	7840746	Infinity	0.0223157
596834	taxon:9606	2.75885		0	164131	1902	family with sequence similarity 19 member A4, C-C motif chemokine like	gene	biological_process-&-1&-GO:0042391-&&-regulation of membrane potential-%%-GO:0051930-&&-regulation of sensory perception of pain|cellular_component-&-1&-GO:0005576-&&-extracellular region|molecular_function-&-1&-GO:0005515-&&-protein binding	G:9606:FAM19A4		FALSE		FAM19A4	Homo sapiens (Human)-&&-9606	Gene Symbol-&-1&-FAM19A4		0.36247	1	2	4		FALSE		FAM19A4	FAM19A4	1095		0	2	0	0.706859	FALSE	0	FAM19A4	0		0.504841
596835	taxon:9606	2.65282		3.85e-06	180512	1902	heat shock protein family A (Hsp70) member 7	gene	biological_process-&-1&-GO:0008150-&&-biological_process|cellular_component-&-1&-GO:0070062-&&-extracellular exosome-%%-GO:0072562-&&-blood microparticle-%%-GO:0008180-&&-COP9 signalosome|molecular_function-&-1&-GO:0005524-&&-ATP binding-%%-GO:0003674-&&-molecular_function	G:9606:HSPA7		FALSE		HSPA7	Homo sapiens (Human)-&&-9606	Gene Symbol-&-1&-HSPA7		0.376957	0.304348	23	4		FALSE		HSPA7	HSPA7	308.652		0	23	0	0.72453	FALSE	0	HSPA7	23798		0.112181
596836	taxon:9606	2.39538	133.745	8.487e-05	180513	1902	heat shock protein family A (Hsp70) member 6	gene	biological_process-&-1&-GO:0043312-&&-neutrophil degranulation-%%-GO:0034605-&&-cellular response to heat-%%-GO:0070370-&&-cellular heat acclimation-%%-GO:0006986-&&-response to unfolded protein-%%-GO:0042026-&&-protein refolding|cellular_component-&-1&-GO:0034774-&&-secretory granule lumen-%%-GO:1904813-&&-ficolin-1-rich granule lumen-%%-GO:0005737-&&-cytoplasm-%%-GO:0070062-&&-extracellular exo…	G:9606:HSPA6		FALSE	KEGG-&-1&-hsa04612-&&-Antigen processing and presentation-%%-hsa05162-&&-Measles-%%-hsa04915-&&-Estrogen signaling pathway-%%-hsa04010-&&-MAPK signaling pathway-%%-hsa05164-&&-Influenza A-%%-hsa05145-&&-Toxoplasmosis-%%-hsa04141-&&-Protein processing in endoplasmic reticulum-%%-hsa04213-&&-Longevity regulating pathway - multiple species-%%-hsa03040-&&-Spliceosome-%%-hsa04144-&&-Endocytosis-%%-hsa…	HSPA6	Homo sapiens (Human)-&&-9606	Gene Symbol-&-1&-HSPA6	0.49699	0.417469	0.171753	72	4	0.0140411	FALSE	14.2353	HSPA6	HSPA6	211.597	14.5373	0	72	0	0.767436	FALSE	0	HSPA6	312192	Infinity	0.0453847
596837	taxon:9606	2.76667		0	164129	1902	protein phosphatase 2C like domain containing 1	gene	biological_process-&-1&-GO:0006470-&&-protein dephosphorylation|molecular_function-&-1&-GO:0004722-&&-protein serine/threonine phosphatase activity	G:9606:PP2D1		FALSE		PP2D1	Homo sapiens (Human)-&&-9606	Gene Symbol-&-1&-PP2D1		0.361446	0	1	4		FALSE		PP2D1	PP2D1	2132		0	1	0	0.705556	FALSE	0	PP2D1	0		0
596838	taxon:9606	2.16718	2070.47	0.0008994	180518	1902	heat shock protein family A (Hsp70) member 1B	gene	biological_process-&-1&-GO:0010628-&&-positive regulation of gene expression-%%-GO:1901673-&&-regulation of mitotic spindle assembly-%%-GO:0070434-&&-positive regulation of nucleotide-binding oligomerization domain containing 2 signaling pathway-%%-GO:0050821-&&-protein stabilization-%%-GO:0051092-&&-positive regulation of NF-kappaB transcription factor activity-%%-GO:0090084-&&-negative regulati…	G:9606:HSPA1B		FALSE	KEGG-&-1&-hsa04612-&&-Antigen processing and presentation-%%-hsa05162-&&-Measles-%%-hsa04915-&&-Estrogen signaling pathway-%%-hsa05145-&&-Toxoplasmosis-%%-hsa04010-&&-MAPK signaling pathway-%%-hsa05164-&&-Influenza A-%%-hsa04213-&&-Longevity regulating pathway - multiple species-%%-hsa04141-&&-Protein processing in endoplasmic reticulum-%%-hsa03040-&&-Spliceosome-%%-hsa04144-&&-Endocytosis-%%-hsa…	HSPA1B	Homo sapiens (Human)-&&-9606	Gene Symbol-&-1&-HSPA1B	0.529035	0.461429	0.100657	224	4	0.0400004	FALSE	26.9156	HSPA1B	HSPA1B	190.683	37.4667	0	224	0	0.80547	FALSE	0	HSPA1B	3335572	Infinity	0.0303919
596839	taxon:9606	2.16718	2070.47	0.0008994	180519	1902	heat shock protein family A (Hsp70) member 1A	gene	biological_process-&-1&-GO:0010628-&&-positive regulation of gene expression-%%-GO:1901673-&&-regulation of mitotic spindle assembly-%%-GO:0070434-&&-positive regulation of nucleotide-binding oligomerization domain containing 2 signaling pathway-%%-GO:0050821-&&-protein stabilization-%%-GO:0051092-&&-positive regulation of NF-kappaB transcription factor activity-%%-GO:0090084-&&-negative regulati…	G:9606:HSPA1A		FALSE	KEGG-&-1&-hsa04612-&&-Antigen processing and presentation-%%-hsa05020-&&-Prion diseases-%%-hsa05162-&&-Measles-%%-hsa04915-&&-Estrogen signaling pathway-%%-hsa05145-&&-Toxoplasmosis-%%-hsa04010-&&-MAPK signaling pathway-%%-hsa05164-&&-Influenza A-%%-hsa04141-&&-Protein processing in endoplasmic reticulum-%%-hsa04213-&&-Longevity regulating pathway - multiple species-%%-hsa03040-&&-Spliceosome-%%-…	HSPA1A	Homo sapiens (Human)-&&-9606	Gene Symbol-&-1&-HSPA1A	0.529035	0.461429	0.100657	224	4	0.0400004	FALSE	26.9156	HSPA1A	HSPA1A	190.683	37.4667	0	224	0	0.80547	FALSE	0	HSPA1A	3335572	Infinity	0.0303919
596840	taxon:9606	2.25846		0.00016243	180516	1902	heat shock protein family A (Hsp70) member 2	gene	biological_process-&-1&-GO:0007283-&&-spermatogenesis-%%-GO:0007286-&&-spermatid development-%%-GO:0009409-&&-response to cold-%%-GO:0090084-&&-negative regulation of inclusion body assembly-%%-GO:0006986-&&-response to unfolded protein-%%-GO:0042026-&&-protein refolding-%%-GO:0007140-&&-male meiosis-%%-GO:0009408-&&-response to heat|cellular_component-&-1&-GO:0072687-&&-meiotic spindle-%%-GO:007…	G:9606:HSPA2		FALSE	KEGG-&-1&-hsa04612-&&-Antigen processing and presentation-%%-hsa05162-&&-Measles-%%-hsa04915-&&-Estrogen signaling pathway-%%-hsa05164-&&-Influenza A-%%-hsa05145-&&-Toxoplasmosis-%%-hsa04010-&&-MAPK signaling pathway-%%-hsa04141-&&-Protein processing in endoplasmic reticulum-%%-hsa04213-&&-Longevity regulating pathway - multiple species-%%-hsa03040-&&-Spliceosome-%%-hsa04144-&&-Endocytosis-%%-hsa…	HSPA2	Homo sapiens (Human)-&&-9606	Gene Symbol-&-1&-HSPA2		0.442779	0.150725	70	4		FALSE		HSPA2	HSPA2	228.1		0	70	0	0.790256	FALSE	0	HSPA2	482474		0.0397941
596841	taxon:9606	2.26577	601.272	0.00045985	180517	1902	heat shock protein family A (Hsp70) member 1 like	gene	biological_process-&-1&-GO:1903955-&&-positive regulation of protein targeting to mitochondrion-%%-GO:0007339-&&-binding of sperm to zona pellucida-%%-GO:0006986-&&-response to unfolded protein-%%-GO:0042026-&&-protein refolding-%%-GO:1900034-&&-regulation of cellular response to heat|cellular_component-&-1&-GO:0002199-&&-zona pellucida receptor complex-%%-GO:0005759-&&-mitochondrial matrix-%%-GO…	G:9606:HSPA1L		FALSE	KEGG-&-1&-hsa04612-&&-Antigen processing and presentation-%%-hsa05162-&&-Measles-%%-hsa04915-&&-Estrogen signaling pathway-%%-hsa05145-&&-Toxoplasmosis-%%-hsa05164-&&-Influenza A-%%-hsa04010-&&-MAPK signaling pathway-%%-hsa04213-&&-Longevity regulating pathway - multiple species-%%-hsa04141-&&-Protein processing in endoplasmic reticulum-%%-hsa03040-&&-Spliceosome-%%-hsa04144-&&-Endocytosis-%%-hsa…	HSPA1L	Homo sapiens (Human)-&&-9606	Gene Symbol-&-1&-HSPA1L	0.513808	0.441351	0.114212	137	4	0.0245328	FALSE	19.871	HSPA1L	HSPA1L	187.358	22.2743	0	137	0	0.789038	FALSE	0	HSPA1L	1242522	Infinity	0.033516
596842	taxon:9606	2.76615		3.761e-05	164133	1902	deltex E3 ubiquitin ligase 3L	gene	biological_process-&-1&-GO:0006974-&&-cellular response to DNA damage stimulus-%%-GO:0000209-&&-protein polyubiquitination-%%-GO:0006302-&&-double-strand break repair-%%-GO:0010390-&&-histone monoubiquitination|cellular_component-&-1&-GO:0005634-&&-nucleus-%%-GO:0005829-&&-cytosol-%%-GO:0005737-&&-cytoplasm-%%-GO:0005654-&&-nucleoplasm|molecular_function-&-1&-GO:0004842-&&-ubiquitin-protein trans…	G:9606:DTX3L		FALSE	KEGG-&-1&-hsa04330-&&-Notch signaling pathway	DTX3L	Homo sapiens (Human)-&&-9606	Gene Symbol-&-1&-DTX3L		0.361513	0.0838384	47	4		FALSE		DTX3L	DTX3L	162.444		0	46	0	0.705641	FALSE	1	DTX3L	135124		0.0867521
596843	taxon:9606	2.85346		3.587e-05	180522	1902	heat shock transcription factor 4	gene	biological_process-&-1&-GO:0007601-&&-visual perception-%%-GO:0008284-&&-positive regulation of cell proliferation-%%-GO:0045944-&&-positive regulation of transcription from RNA polymerase II promoter-%%-GO:0048468-&&-cell development-%%-GO:0070207-&&-protein homotrimerization-%%-GO:0033169-&&-histone H3-K9 demethylation-%%-GO:0000122-&&-negative regulation of transcription from RNA polymerase II…	G:9606:HSF4		FALSE		HSF4	Homo sapiens (Human)-&&-9606	Gene Symbol-&-1&-HSF4		0.350452	0.142857	17	4		FALSE		HSF4	HSF4	123.333		0	16	0	0.69109	FALSE	1	HSF4	75978		0.0960938
596844	taxon:9606	3.04487		4e-08	164138	1902	uridine phosphorylase 2	gene	biological_process-&-1&-GO:0009116-&&-nucleoside metabolic process-%%-GO:0009166-&&-nucleotide catabolic process-%%-GO:0043097-&&-pyrimidine nucleoside salvage-%%-GO:0044206-&&-UMP salvage-%%-GO:0046135-&&-pyrimidine nucleoside catabolic process-%%-GO:0046108-&&-uridine metabolic process|cellular_component-&-1&-GO:0045098-&&-type III intermediate filament-%%-GO:0005829-&&-cytosol|molecular_functi…	G:9606:UPP2		FALSE	KEGG-&-1&-hsa00983-&&-Drug metabolism - other enzymes-%%-hsa00240-&&-Pyrimidine metabolism-%%-hsa01100-&&-Metabolic pathways	UPP2	Homo sapiens (Human)-&&-9606	Gene Symbol-&-1&-UPP2		0.328421	0	4	5		FALSE		UPP2	UPP2	205		0	3	0	0.659188	FALSE	1	UPP2	174		0.512563
596845	taxon:9606	2.25782	1278.29	0.00051147	180520	1902	DnaJ heat shock protein family (Hsp40) member A1	gene	biological_process-&-1&-GO:1903748-&&-negative regulation of establishment of protein localization to mitochondrion-%%-GO:0051223-&&-regulation of protein transport-%%-GO:1901998-&&-toxin transport-%%-GO:0030317-&&-flagellated sperm motility-%%-GO:0043066-&&-negative regulation of apoptotic process-%%-GO:0043508-&&-negative regulation of JUN kinase activity-%%-GO:0007283-&&-spermatogenesis-%%-GO:…	G:9606:DNAJA1		FALSE	KEGG-&-1&-hsa04141-&&-Protein processing in endoplasmic reticulum	DNAJA1	Homo sapiens (Human)-&&-9606	Gene Symbol-&-1&-DNAJA1	0.517228	0.442905	0.115136	156	4	0.0285755	FALSE	21.4444	DNAJA1	DNAJA1	198.288	24.4339	0	156	0	0.790363	FALSE	0	DNAJA1	1554142	Infinity	0.0351179
596846	taxon:9606	2.69833		3.48e-05	180521	1902	DnaJ heat shock protein family (Hsp40) member B2	gene	biological_process-&-1&-GO:0061077-&&-chaperone-mediated protein folding-%%-GO:0031396-&&-regulation of protein ubiquitination-%%-GO:0032091-&&-negative regulation of protein binding-%%-GO:0032781-&&-positive regulation of ATPase activity-%%-GO:0090084-&&-negative regulation of inclusion body assembly-%%-GO:1903644-&&-regulation of chaperone-mediated protein folding-%%-GO:0006986-&&-response to u…	G:9606:DNAJB2		FALSE	KEGG-&-1&-hsa04141-&&-Protein processing in endoplasmic reticulum	DNAJB2	Homo sapiens (Human)-&&-9606	Gene Symbol-&-1&-DNAJB2		0.370599	0.127731	35	4		FALSE		DNAJB2	DNAJB2	130.743		0	35	0	0.716944	FALSE	0	DNAJB2	65222		0.0548059
596847	taxon:9606	2.85718		4.23e-06	180527	1902	hydroxysteroid 17-beta dehydrogenase 3	gene	biological_process-&-1&-GO:0061370-&&-testosterone biosynthetic process-%%-GO:0006702-&&-androgen biosynthetic process-%%-GO:0030539-&&-male genitalia development-%%-GO:0055114-&&-oxidation-reduction process|cellular_component-&-1&-GO:0005783-&&-endoplasmic reticulum-%%-GO:0005789-&&-endoplasmic reticulum membrane-%%-GO:0043231-&&-intracellular membrane-bounded organelle|molecular_function-&-1&-G…	G:9606:HSD17B3		FALSE	KEGG-&-1&-hsa00140-&&-Steroid hormone biosynthesis-%%-hsa01100-&&-Metabolic pathways	HSD17B3	Homo sapiens (Human)-&&-9606	Gene Symbol-&-1&-HSD17B3		0.349996	0.043956	14	4		FALSE		HSD17B3	HSD17B3	123.571		0	14	0	0.69047	FALSE	0	HSD17B3	11922		0.0992287
596848	taxon:9606	2.45103	365.362	0.00040139	180524	1902	heat shock transcription factor 1	gene	biological_process-&-1&-GO:0008285-&&-negative regulation of cell proliferation-%%-GO:0009299-&&-mRNA transcription-%%-GO:0051028-&&-mRNA transport-%%-GO:0034605-&&-cellular response to heat-%%-GO:0043280-&&-positive regulation of cysteine-type endopeptidase activity involved in apoptotic process-%%-GO:2001033-&&-negative regulation of double-strand break repair via nonhomologous end joining-%%-G…	G:9606:HSF1	HSF1	TRUE	KEGG-&-1&-hsa05134-&&-Legionellosis	HSF1	Homo sapiens (Human)-&&-9606	Gene Symbol-&-1&-HSF1	0.481414	0.407992	0.0725945	99	4	0.0100301	FALSE	10	HSF1	HSF1	135.732	10.3674	0	98	0	0.758162	FALSE	1	HSF1	805382	Infinity	0.0322895
596849	taxon:9606	2.51679		5.882e-05	180525	1902	hydrogenase 4	gene	biological_process-&-1&-GO:0033540-&&-fatty acid beta-oxidation using acyl-CoA oxidase-%%-GO:0036111-&&-very long-chain fatty-acyl-CoA metabolic process-%%-GO:0008209-&&-androgen metabolic process-%%-GO:0008210-&&-estrogen metabolic process-%%-GO:0001649-&&-osteoblast differentiation-%%-GO:0036112-&&-medium-chain fatty-acyl-CoA metabolic process-%%-GO:0000038-&&-very long-chain fatty acid metabol…	G:9606:HSD17B4		FALSE	KEGG-&-1&-hsa01212-&&-Fatty acid metabolism-%%-hsa00120-&&-Primary bile acid biosynthesis-%%-hsa01100-&&-Metabolic pathways-%%-hsa04146-&&-Peroxisome-%%-hsa01040-&&-Biosynthesis of unsaturated fatty acids	HSD17B4	Homo sapiens (Human)-&&-9606	Gene Symbol-&-1&-HSD17B4		0.397331	0.104202	37	4		FALSE		HSD17B4	HSD17B4	229.371		0	36	0	0.747201	FALSE	1	HSD17B4	142742		0.0609003
596850	taxon:9606	2.645		4.408e-05	180534	1902	factor 1	gene	biological_process-&-1&-GO:0090162-&&-establishment of epithelial cell polarity-%%-GO:0061626-&&-pharyngeal arch artery morphogenesis-%%-GO:0060412-&&-ventricular septum morphogenesis-%%-GO:0007219-&&-Notch signaling pathway-%%-GO:0042668-&&-auditory receptor cell fate determination-%%-GO:0045892-&&-negative regulation of transcription, DNA-templated-%%-GO:0045608-&&-negative regulation of audito…	G:9606:HES1		FALSE	KEGG-&-1&-hsa04950-&&-Maturity onset diabetes of the young-%%-hsa05169-&&-Epstein-Barr virus infection-%%-hsa04330-&&-Notch signaling pathway-%%-hsa05165-&&-Human papillomavirus infection-%%-hsa05200-&&-Pathways in cancer-%%-hsa05224-&&-Breast cancer-%%-hsa03460-&&-Fanconi anemia pathway	HES1	Homo sapiens (Human)-&&-9606	Gene Symbol-&-1&-HES1		0.378072	0.104167	33	4		FALSE		HES1	HES1	152.121		0	33	0	0.725833	FALSE	0	HES1	85038		0.0547945
596851	taxon:9606	2.31487	874.212	0.00054945	180535	1902	protein arginine methyltransferase 1	gene	biological_process-&-1&-GO:0006479-&&-protein methylation-%%-GO:0046985-&&-positive regulation of hemoglobin biosynthetic process-%%-GO:0045653-&&-negative regulation of megakaryocyte differentiation-%%-GO:1900745-&&-positive regulation of p38MAPK cascade-%%-GO:0006977-&&-DNA damage response, signal transduction by p53 class mediator resulting in cell cycle arrest-%%-GO:0031175-&&-neuron projecti…	G:9606:PRMT1		FALSE	KEGG-&-1&-hsa04068-&&-FoxO signaling pathway-%%-hsa04922-&&-Glucagon signaling pathway	PRMT1	Homo sapiens (Human)-&&-9606	Gene Symbol-&-1&-PRMT1	0.511025	0.431989	0.128257	156	4	0.0322424	FALSE	28.1212	PRMT1	PRMT1	201.844	30.4174	0	155	0	0.780855	FALSE	1	PRMT1	1631884	Infinity	0.0388174
596852	taxon:9606	2.82308		1.04e-05	180533	1902	heat shock factor binding protein 1	gene	biological_process-&-1&-GO:0006936-&&-muscle contraction-%%-GO:0035987-&&-endodermal cell differentiation-%%-GO:0000122-&&-negative regulation of transcription from RNA polymerase II promoter-%%-GO:1900034-&&-regulation of cellular response to heat|cellular_component-&-1&-GO:0005634-&&-nucleus-%%-GO:0005856-&&-cytoskeleton-%%-GO:0005654-&&-nucleoplasm|molecular_function-&-1&-GO:0005515-&&-protein…	G:9606:HSBP1		FALSE		HSBP1	Homo sapiens (Human)-&&-9606	Gene Symbol-&-1&-HSBP1		0.354223	0.183824	19	4		FALSE		HSBP1	HSBP1	131.882		0	18	0	0.696154	FALSE	1	HSBP1	27114		0.0875122
596853	taxon:9606	2.64333		5.722e-05	180536	1902	protein arginine methyltransferase 2	gene	biological_process-&-1&-GO:0006479-&&-protein methylation-%%-GO:0043065-&&-positive regulation of apoptotic process-%%-GO:2000134-&&-negative regulation of G1/S transition of mitotic cell cycle-%%-GO:0045892-&&-negative regulation of transcription, DNA-templated-%%-GO:0045893-&&-positive regulation of transcription, DNA-templated-%%-GO:0032088-&&-negative regulation of NF-kappaB transcription fac…	G:9606:PRMT2		FALSE		PRMT2	Homo sapiens (Human)-&&-9606	Gene Symbol-&-1&-PRMT2		0.37831	0.0634249	46	4		FALSE		PRMT2	PRMT2	122.318		0	45	0	0.726111	FALSE	1	PRMT2	128196		0.0439896
596854	taxon:9606	2.64564		5.9e-07	180542	1902	ArfGAP with FG repeats 2	gene	biological_process-&-1&-GO:0008150-&&-biological_process-%%-GO:0043547-&&-positive regulation of GTPase activity|cellular_component-&-1&-GO:0016020-&&-membrane|molecular_function-&-1&-GO:0003674-&&-molecular_function-%%-GO:0046872-&&-metal ion binding-%%-GO:0005096-&&-GTPase activator activity	G:9606:AGFG2		FALSE		AGFG2	Homo sapiens (Human)-&&-9606	Gene Symbol-&-1&-AGFG2		0.37798	0.333333	3	4		FALSE		AGFG2	AGFG2	1053.67		0	3	0	0.725727	FALSE	0	AGFG2	4618		0.367912
596855	taxon:9606	2.83821		6.22e-06	164158	1902	C2 calcium dependent domain containing 6	gene	molecular_function-&-1&-GO:0005515-&&-protein binding	G:9606:C2CD6		FALSE		C2CD6	Homo sapiens (Human)-&&-9606	Gene Symbol-&-1&-C2CD6		0.352335	0.0166667	16	4		FALSE		C2CD6	C2CD6	131.688		0	16	0	0.693632	FALSE	0	C2CD6	20934		0.0925353
596856	taxon:9606	2.81538		3.247e-05	164159	1902	shugoshin 2	gene	biological_process-&-1&-GO:0051754-&&-meiotic sister chromatid cohesion, centromeric-%%-GO:0051301-&&-cell division-%%-GO:0007062-&&-sister chromatid cohesion|cellular_component-&-1&-GO:0005829-&&-cytosol-%%-GO:0030892-&&-mitotic cohesin complex-%%-GO:0005654-&&-nucleoplasm-%%-GO:0016604-&&-nuclear body-%%-GO:0000775-&&-chromosome, centromeric region-%%-GO:0000777-&&-condensed chromosome kinetoch…	G:9606:SGO2		FALSE		SGO2	Homo sapiens (Human)-&&-9606	Gene Symbol-&-1&-SGO2		0.355191	0.0436975	37	4		FALSE		SGO2	SGO2	101.286		0	36	0	0.697436	FALSE	1	SGO2	74170		0.0651768
596857	taxon:9606	2.50436		6.724e-05	180543	1902	ArfGAP with FG repeats 1	gene	biological_process-&-1&-GO:0045109-&&-intermediate filament organization-%%-GO:0061024-&&-membrane organization-%%-GO:0001675-&&-acrosome assembly-%%-GO:0006406-&&-mRNA export from nucleus-%%-GO:0007275-&&-multicellular organism development-%%-GO:0043547-&&-positive regulation of GTPase activity-%%-GO:0007289-&&-spermatid nucleus differentiation|cellular_component-&-1&-GO:0005643-&&-nuclear pore-…	G:9606:AGFG1		FALSE	KEGG-&-1&-hsa05164-&&-Influenza A	AGFG1	Homo sapiens (Human)-&&-9606	Gene Symbol-&-1&-AGFG1		0.399304	0.203333	27	4		FALSE		AGFG1	AGFG1	234.44		0	26	0	0.749274	FALSE	1	AGFG1	110332		0.0603036
596858	taxon:9606	3.28615		5.5e-07	180541	1902	histamine receptor H1	gene	biological_process-&-1&-GO:0048016-&&-inositol phosphate-mediated signaling-%%-GO:0032962-&&-positive regulation of inositol trisphosphate biosynthetic process-%%-GO:0050804-&&-modulation of synaptic transmission-%%-GO:0008542-&&-visual learning-%%-GO:0048167-&&-regulation of synaptic plasticity-%%-GO:0071420-&&-cellular response to histamine-%%-GO:0045907-&&-positive regulation of vasoconstricti…	G:9606:HRH1	HRH1	TRUE	KEGG-&-1&-hsa04020-&&-Calcium signaling pathway-%%-hsa04750-&&-Inflammatory mediator regulation of TRP channels-%%-hsa04080-&&-Neuroactive ligand-receptor interaction	HRH1	Homo sapiens (Human)-&&-9606	Gene Symbol-&-1&-HRH1		0.304307	0.666667	4	5		FALSE		HRH1	HRH1	41.75		0	4	0	0.618974	FALSE	0	HRH1	832		0.318702
596859	taxon:9606	2.7291		1.173e-05	164162	1902	kelch like family member 23	gene	biological_process-&-1&-GO:0016567-&&-protein ubiquitination|cellular_component-&-1&-GO:0031463-&&-Cul3-RING ubiquitin ligase complex|molecular_function-&-1&-GO:0004842-&&-ubiquitin-protein transferase activity-%%-GO:0005515-&&-protein binding	G:9606:KLHL23		FALSE		KLHL23	Homo sapiens (Human)-&&-9606	Gene Symbol-&-1&-KLHL23		0.366421	0.179487	13	4		FALSE		KLHL23	KLHL23	308.385		0	13	0	0.711816	FALSE	0	KLHL23	24156		0.140961
596860	taxon:9606	3.09538		8.2e-07	180544	1902	ES cell expressed Ras	gene	biological_process-&-1&-GO:0007264-&&-small GTPase mediated signal transduction|cellular_component-&-1&-GO:0005886-&&-plasma membrane-%%-GO:0005622-&&-intracellular|molecular_function-&-1&-GO:0005525-&&-GTP binding	G:9606:ERAS		FALSE		ERAS	Homo sapiens (Human)-&&-9606	Gene Symbol-&-1&-ERAS		0.323062	0.333333	4	5		FALSE		ERAS	ERAS	125.75		0	4	0	0.650769	FALSE	0	ERAS	1330		0.276432
596861	taxon:9606	2.33936	357.659	0.00087135	180545	1902	HRas proto-oncogene, GTPase	gene	biological_process-&-1&-GO:0001934-&&-positive regulation of protein phosphorylation-%%-GO:0032729-&&-positive regulation of interferon-gamma production-%%-GO:0042832-&&-defense response to protozoan-%%-GO:0051291-&&-protein heterooligomerization-%%-GO:0050900-&&-leukocyte migration-%%-GO:0009887-&&-animal organ morphogenesis-%%-GO:0008284-&&-positive regulation of cell proliferation-%%-GO:004352…	G:9606:HRAS	HRAS	TRUE	KEGG-&-1&-hsa04916-&&-Melanogenesis-%%-hsa05223-&&-Non-small cell lung cancer-%%-hsa01521-&&-EGFR tyrosine kinase inhibitor resistance-%%-hsa04630-&&-JAK-STAT signaling pathway-%%-hsa04919-&&-Thyroid hormone signaling pathway-%%-hsa04151-&&-PI3K-Akt signaling pathway-%%-hsa04068-&&-FoxO signaling pathway-%%-hsa04010-&&-MAPK signaling pathway-%%-hsa05220-&&-Chronic myeloid leukemia-%%-hsa05203-&&-…	HRAS	Homo sapiens (Human)-&&-9606	Gene Symbol-&-1&-HRAS	0.473477	0.427468	0.0413297	108	4	0.00553559	FALSE	7.25	HRAS	HRAS	103.594	7.65558	0	107	0	0.776774	FALSE	1	HRAS	1310124	Infinity	0.0205304
596862	taxon:9606	2.81962		3.67e-06	164164	1902	methyltransferase like 21A	gene	biological_process-&-1&-GO:0006479-&&-protein methylation-%%-GO:0018022-&&-peptidyl-lysine methylation-%%-GO:0043462-&&-regulation of ATPase activity|cellular_component-&-1&-GO:0005737-&&-cytoplasm-%%-GO:0005654-&&-nucleoplasm|molecular_function-&-1&-GO:0016279-&&-protein-lysine N-methyltransferase activity-%%-GO:0030544-&&-Hsp70 protein binding-%%-GO:0051117-&&-ATPase binding-%%-GO:0005515-&&-pr…	G:9606:METTL21A		FALSE		METTL21A	Homo sapiens (Human)-&&-9606	Gene Symbol-&-1&-METTL21A		0.354658	0.294118	18	4		FALSE		METTL21A	METTL21A	163.667		0	18	0	0.696731	FALSE	0	METTL21A	10516		0.108495
596863	taxon:9606	2.72192		1.663e-05	164165	1902	ADP ribosylation factor like GTPase 6 interacting protein 6	gene	cellular_component-&-1&-GO:0016021-&&-integral component of membrane	G:9606:ARL6IP6		FALSE		ARL6IP6	Homo sapiens (Human)-&&-9606	Gene Symbol-&-1&-ARL6IP6		0.367387	0.142857	7	4		FALSE		ARL6IP6	ARL6IP6	351.286		0	7	0	0.713013	FALSE	0	ARL6IP6	15664		0.148291
596864	taxon:9606	2.62538		2.493e-05	180555	1902	hypoxanthine phosphoribosyltransferase 1	gene	biological_process-&-1&-GO:0006166-&&-purine ribonucleoside salvage-%%-GO:0046038-&&-GMP catabolic process-%%-GO:0045964-&&-positive regulation of dopamine metabolic process-%%-GO:0046100-&&-hypoxanthine metabolic process-%%-GO:0006164-&&-purine nucleotide biosynthetic process-%%-GO:0021756-&&-striatum development-%%-GO:0051289-&&-protein homotetramerization-%%-GO:0048813-&&-dendrite morphogenesi…	G:9606:HPRT1		FALSE	KEGG-&-1&-hsa00983-&&-Drug metabolism - other enzymes-%%-hsa01100-&&-Metabolic pathways-%%-hsa00230-&&-Purine metabolism	HPRT1	Homo sapiens (Human)-&&-9606	Gene Symbol-&-1&-HPRT1		0.380897	0.106061	35	4		FALSE		HPRT1	HPRT1	216.424		0	34	0	0.729103	FALSE	1	HPRT1	84472		0.0732631
596865	taxon:9606	2.72577		5.5e-07	164169	1902	zinc finger protein 385B	gene	biological_process-&-1&-GO:0072332-&&-intrinsic apoptotic signaling pathway by p53 class mediator|cellular_component-&-1&-GO:0005634-&&-nucleus-%%-GO:0001650-&&-fibrillar center|molecular_function-&-1&-GO:0008270-&&-zinc ion binding-%%-GO:0002039-&&-p53 binding-%%-GO:0003723-&&-RNA binding	G:9606:ZNF385B		FALSE		ZNF385B	Homo sapiens (Human)-&&-9606	Gene Symbol-&-1&-ZNF385B		0.366869	0.333333	3	4		FALSE		ZNF385B	ZNF385B	918.667		0	3	0	0.712372	FALSE	0	ZNF385B	3576		0.38683
596866	taxon:9606	2.76667		0	180558	1902	hydroxyprostaglandin dehydrogenase 15-(NAD)	gene	biological_process-&-1&-GO:0030728-&&-ovulation-%%-GO:1904707-&&-positive regulation of vascular smooth muscle cell proliferation-%%-GO:0097070-&&-ductus arteriosus closure-%%-GO:0032496-&&-response to lipopolysaccharide-%%-GO:0055114-&&-oxidation-reduction process-%%-GO:0019372-&&-lipoxygenase pathway-%%-GO:0045786-&&-negative regulation of cell cycle-%%-GO:0006693-&&-prostaglandin metabolic pro…	G:9606:HPGD		FALSE	KEGG-&-1&-hsa05202-&&-Transcriptional misregulation in cancer	HPGD	Homo sapiens (Human)-&&-9606	Gene Symbol-&-1&-HPGD		0.361446	0	1	4		FALSE		HPGD	HPGD	2132		0	1	0	0.705556	FALSE	0	HPGD	0		0
596867	taxon:9606	2.7359		1.205e-05	164174	1902	septin 10	gene	biological_process-&-1&-GO:0051301-&&-cell division-%%-GO:0007049-&&-cell cycle|cellular_component-&-1&-GO:0005737-&&-cytoplasm-%%-GO:0005856-&&-cytoskeleton|molecular_function-&-1&-GO:0005525-&&-GTP binding-%%-GO:0005515-&&-protein binding	G:9606:SEPT10		FALSE		SEPT10	Homo sapiens (Human)-&&-9606	Gene Symbol-&-1&-SEPT10		0.365511	0.294118	18	4		FALSE		SEPT10	SEPT10	171.667		0	18	0	0.710684	FALSE	0	SEPT10	29764		0.0784075
596868	taxon:9606	3.2959		6.6e-07	180556	1902	haptoglobin-related protein	gene	biological_process-&-1&-GO:0006898-&&-receptor-mediated endocytosis|cellular_component-&-1&-GO:0005576-&&-extracellular region-%%-GO:0034366-&&-spherical high-density lipoprotein particle-%%-GO:0070062-&&-extracellular exosome-%%-GO:0072562-&&-blood microparticle|molecular_function-&-1&-GO:0030492-&&-hemoglobin binding	G:9606:HPR		FALSE	KEGG-&-1&-hsa05143-&&-African trypanosomiasis	HPR	Homo sapiens (Human)-&&-9606	Gene Symbol-&-1&-HPR		0.303407	0.333333	4	5		FALSE		HPR	HPR	34.25		0	4	0	0.61735	FALSE	0	HPR	440		0.263566
596869	taxon:9606	2.72115		3.331e-05	180562	1902	hippocalcin like 1	gene	cellular_component-&-1&-GO:0070062-&&-extracellular exosome-%%-GO:0016020-&&-membrane|molecular_function-&-1&-GO:0005509-&&-calcium ion binding-%%-GO:0005515-&&-protein binding	G:9606:HPCAL1		FALSE		HPCAL1	Homo sapiens (Human)-&&-9606	Gene Symbol-&-1&-HPCAL1		0.367491	0.17619	21	4		FALSE		HPCAL1	HPCAL1	167.571		0	21	0	0.713141	FALSE	0	HPCAL1	82528		0.0742409
596870	taxon:9606	2.93526		1.37e-06	180561	1902	4-hydroxyphenylpyruvate dioxygenase	gene	biological_process-&-1&-GO:0006559-&&-L-phenylalanine catabolic process-%%-GO:0055114-&&-oxidation-reduction process-%%-GO:0006572-&&-tyrosine catabolic process|cellular_component-&-1&-GO:0005789-&&-endoplasmic reticulum membrane-%%-GO:0005829-&&-cytosol-%%-GO:0070062-&&-extracellular exosome-%%-GO:0000139-&&-Golgi membrane|molecular_function-&-1&-GO:0003868-&&-4-hydroxyphenylpyruvate dioxygenase…	G:9606:HPD		FALSE	KEGG-&-1&-hsa00350-&&-Tyrosine metabolism-%%-hsa00130-&&-Ubiquinone and other terpenoid-quinone biosynthesis-%%-hsa01100-&&-Metabolic pathways-%%-hsa00360-&&-Phenylalanine metabolism	HPD	Homo sapiens (Human)-&&-9606	Gene Symbol-&-1&-HPD		0.340686	0.133333	6	4		FALSE		HPD	HPD	144		0	6	0	0.677457	FALSE	0	HPD	2548		0.183015
596871	taxon:9606	2.80769		3.525e-05	180564	1902	homeobox D13	gene	biological_process-&-1&-GO:0048619-&&-embryonic hindgut morphogenesis-%%-GO:0042127-&&-regulation of cell proliferation-%%-GO:0060687-&&-regulation of branching involved in prostate gland morphogenesis-%%-GO:0006366-&&-transcription from RNA polymerase II promoter-%%-GO:0001501-&&-skeletal system development-%%-GO:0042733-&&-embryonic digit morphogenesis-%%-GO:0060602-&&-branch elongation of an e…	G:9606:HOXD13		FALSE		HOXD13	Homo sapiens (Human)-&&-9606	Gene Symbol-&-1&-HOXD13		0.356164	0.0758621	30	4		FALSE		HOXD13	HOXD13	96.6667		0	30	0	0.698718	FALSE	0	HOXD13	66640		0.0600041
596872	taxon:9606	2.9041		1.05e-06	164184	1902	family with sequence similarity 117 member B	gene	molecular_function-&-1&-GO:0005515-&&-protein binding	G:9606:FAM117B		FALSE		FAM117B	Homo sapiens (Human)-&&-9606	Gene Symbol-&-1&-FAM117B		0.34434	0.107143	8	4		FALSE		FAM117B	FAM117B	137.125		0	8	0	0.68265	FALSE	0	FAM117B	3620		0.14217
596873	taxon:9606	2.92423		4.93e-06	180568	1902	homeobox D9	gene	biological_process-&-1&-GO:0008344-&&-adult locomotory behavior-%%-GO:0007519-&&-skeletal muscle tissue development-%%-GO:0009954-&&-proximal/distal pattern formation-%%-GO:0035137-&&-hindlimb morphogenesis-%%-GO:0030879-&&-mammary gland development-%%-GO:0035115-&&-embryonic forelimb morphogenesis-%%-GO:0048704-&&-embryonic skeletal system morphogenesis-%%-GO:0007338-&&-single fertilization-%%-G…	G:9606:HOXD9		FALSE		HOXD9	Homo sapiens (Human)-&&-9606	Gene Symbol-&-1&-HOXD9		0.34197	0.0476191	7	5		FALSE		HOXD9	HOXD9	135		0	7	0	0.679295	FALSE	0	HOXD9	7334		0.152597
596874	taxon:9606	3.00244		2.3e-07	180569	1902	homeobox D8	gene	biological_process-&-1&-GO:0006366-&&-transcription from RNA polymerase II promoter-%%-GO:0008595-&&-anterior/posterior axis specification, embryo-%%-GO:0045944-&&-positive regulation of transcription from RNA polymerase II promoter-%%-GO:0000122-&&-negative regulation of transcription from RNA polymerase II promoter-%%-GO:0048705-&&-skeletal system morphogenesis|cellular_component-&-1&-GO:000563…	G:9606:HOXD8		FALSE		HOXD8	Homo sapiens (Human)-&&-9606	Gene Symbol-&-1&-HOXD8		0.333063	0	5	5		FALSE		HOXD8	HOXD8	135.2		0	5	0	0.666261	FALSE	0	HOXD8	1116		0.254649
596875	taxon:9606	2.52		0.00015686	164194	1902	copper metabolism domain containing 1	gene	biological_process-&-1&-GO:0032088-&&-negative regulation of NF-kappaB transcription factor activity-%%-GO:2000009-&&-negative regulation of protein localization to cell surface-%%-GO:0015031-&&-protein transport-%%-GO:0006893-&&-Golgi to plasma membrane transport-%%-GO:0031398-&&-positive regulation of protein ubiquitination-%%-GO:0055070-&&-copper ion homeostasis-%%-GO:0006351-&&-transcription,…	G:9606:COMMD1		FALSE		COMMD1	Homo sapiens (Human)-&&-9606	Gene Symbol-&-1&-COMMD1		0.396825	0.166184	48	4		FALSE		COMMD1	COMMD1	209.304		0	47	0	0.746667	FALSE	1	COMMD1	286550		0.0561322
596876	taxon:9606	2.9641		9.39e-06	180578	1902	homeobox C9	gene	biological_process-&-1&-GO:0048704-&&-embryonic skeletal system morphogenesis-%%-GO:0006355-&&-regulation of transcription, DNA-templated-%%-GO:0009952-&&-anterior/posterior pattern specification-%%-GO:0006351-&&-transcription, DNA-templated|cellular_component-&-1&-GO:0005654-&&-nucleoplasm-%%-GO:0016235-&&-aggresome|molecular_function-&-1&-GO:0005515-&&-protein binding-%%-GO:0043565-&&-sequence-…	G:9606:HOXC9		FALSE		HOXC9	Homo sapiens (Human)-&&-9606	Gene Symbol-&-1&-HOXC9		0.33737	0.0128205	13	5		FALSE		HOXC9	HOXC9	54.3077		0	13	0	0.67265	FALSE	0	HOXC9	10506		0.0855385
596877	taxon:9606	2.74397		0	164195	1902	olfactory receptor family 6 subfamily B member 3	gene	biological_process-&-1&-GO:0050911-&&-detection of chemical stimulus involved in sensory perception of smell-%%-GO:0007186-&&-G-protein coupled receptor signaling pathway|cellular_component-&-1&-GO:0016021-&&-integral component of membrane-%%-GO:0005886-&&-plasma membrane|molecular_function-&-1&-GO:0004930-&&-G-protein coupled receptor activity-%%-GO:0004984-&&-olfactory receptor activity-%%-GO:0…	G:9606:OR6B3		FALSE	KEGG-&-1&-hsa04740-&&-Olfactory transduction	OR6B3	Homo sapiens (Human)-&&-9606	Gene Symbol-&-1&-OR6B3		0.364435	1	2	4		FALSE		OR6B3	OR6B3	1167		0	2	0	0.709338	FALSE	0	OR6B3	0		0.521914
596878	taxon:9606	2.85359		5.68e-06	180576	1902	homeobox C11	gene	biological_process-&-1&-GO:0006366-&&-transcription from RNA polymerase II promoter-%%-GO:0007492-&&-endoderm development-%%-GO:0001759-&&-organ induction-%%-GO:0009954-&&-proximal/distal pattern formation-%%-GO:0001656-&&-metanephros development-%%-GO:0042733-&&-embryonic digit morphogenesis-%%-GO:0045944-&&-positive regulation of transcription from RNA polymerase II promoter-%%-GO:0009952-&&-an…	G:9606:HOXC11		FALSE		HOXC11	Homo sapiens (Human)-&&-9606	Gene Symbol-&-1&-HOXC11		0.350436	0.127273	11	4		FALSE		HOXC11	HOXC11	156.545		0	11	0	0.691068	FALSE	0	HOXC11	11452		0.117498
596879	taxon:9606	2.77833		6e-07	180577	1902	homeobox C10	gene	biological_process-&-1&-GO:0006366-&&-transcription from RNA polymerase II promoter-%%-GO:0050905-&&-neuromuscular process-%%-GO:0008284-&&-positive regulation of cell proliferation-%%-GO:0009954-&&-proximal/distal pattern formation-%%-GO:0001501-&&-skeletal system development-%%-GO:0045944-&&-positive regulation of transcription from RNA polymerase II promoter-%%-GO:0021520-&&-spinal cord motor …	G:9606:HOXC10		FALSE		HOXC10	Homo sapiens (Human)-&&-9606	Gene Symbol-&-1&-HOXC10		0.359928	0.1	5	4		FALSE		HOXC10	HOXC10	434.6		0	5	0	0.703611	FALSE	0	HOXC10	1924		0.234848
596880	taxon:9606	2.27333	1575.17	0.00124706	180582	1902	stratifin	gene	biological_process-&-1&-GO:0045606-&&-positive regulation of epidermal cell differentiation-%%-GO:0061024-&&-membrane organization-%%-GO:0031424-&&-keratinization-%%-GO:0007165-&&-signal transduction-%%-GO:0030307-&&-positive regulation of cell growth-%%-GO:0006469-&&-negative regulation of protein kinase activity-%%-GO:0046827-&&-positive regulation of protein export from nucleus-%%-GO:0061436-&…	G:9606:SFN		FALSE	KEGG-&-1&-hsa04115-&&-p53 signaling pathway-%%-hsa04110-&&-Cell cycle-%%-hsa04960-&&-Aldosterone-regulated sodium reabsorption	SFN	Homo sapiens (Human)-&&-9606	Gene Symbol-&-1&-SFN	0.517025	0.439883	0.0644481	237	4	0.0315214	FALSE	24.1293	SFN	SFN	121.66	27.859	0	236	0	0.787778	FALSE	1	SFN	2708864	Infinity	0.0223354
596881	taxon:9606	2.62128		5.081e-05	180583	1902	glutamic-oxaloacetic transaminase 2	gene	biological_process-&-1&-GO:0019470-&&-4-hydroxyproline catabolic process-%%-GO:0006531-&&-aspartate metabolic process-%%-GO:0015908-&&-fatty acid transport-%%-GO:0019551-&&-glutamate catabolic process to 2-oxoglutarate-%%-GO:0006094-&&-gluconeogenesis-%%-GO:0006533-&&-aspartate catabolic process-%%-GO:0006536-&&-glutamate metabolic process-%%-GO:0097052-&&-L-kynurenine metabolic process-%%-GO:001…	G:9606:GOT2		FALSE	KEGG-&-1&-hsa01210-&&-2-Oxocarboxylic acid metabolism-%%-hsa00270-&&-Cysteine and methionine metabolism-%%-hsa00250-&&-Alanine, aspartate and glutamate metabolism-%%-hsa00350-&&-Tyrosine metabolism-%%-hsa04975-&&-Fat digestion and absorption-%%-hsa01100-&&-Metabolic pathways-%%-hsa01200-&&-Carbon metabolism-%%-hsa00220-&&-Arginine biosynthesis-%%-hsa00400-&&-Phenylalanine, tyrosine and tryptophan…	GOT2	Homo sapiens (Human)-&&-9606	Gene Symbol-&-1&-GOT2		0.381493	0.109524	36	4		FALSE		GOT2	GOT2	191.361		0	36	0	0.729786	FALSE	0	GOT2	99438		0.0642268
596882	taxon:9606	2.87526		1.258e-05	180580	1902	glycoprotein Ib platelet beta subunit	gene	biological_process-&-1&-GO:0007166-&&-cell surface receptor signaling pathway-%%-GO:0007597-&&-blood coagulation, intrinsic pathway-%%-GO:0030168-&&-platelet activation-%%-GO:0007155-&&-cell adhesion-%%-GO:0007596-&&-blood coagulation|cellular_component-&-1&-GO:0005887-&&-integral component of plasma membrane-%%-GO:0005886-&&-plasma membrane|molecular_function-&-1&-GO:0005515-&&-protein binding-%…	G:9606:GP1BB		FALSE	KEGG-&-1&-hsa04611-&&-Platelet activation-%%-hsa04640-&&-Hematopoietic cell lineage-%%-hsa04512-&&-ECM-receptor interaction	GP1BB	Homo sapiens (Human)-&&-9606	Gene Symbol-&-1&-GP1BB		0.347795	0.151515	12	4		FALSE		GP1BB	GP1BB	117.5		0	12	0	0.687457	FALSE	0	GP1BB	22220		0.104707
596883	taxon:9606	2.61603		5.595e-05	180586	1902	golgin A4	gene	biological_process-&-1&-GO:0000042-&&-protein targeting to Golgi-%%-GO:0043001-&&-Golgi to plasma membrane protein transport-%%-GO:0045773-&&-positive regulation of axon extension-%%-GO:0016192-&&-vesicle-mediated transport|cellular_component-&-1&-GO:0000139-&&-Golgi membrane-%%-GO:0005829-&&-cytosol-%%-GO:0005737-&&-cytoplasm-%%-GO:0070062-&&-extracellular exosome-%%-GO:0005802-&&-trans-Golgi ne…	G:9606:GOLGA4		FALSE		GOLGA4	Homo sapiens (Human)-&&-9606	Gene Symbol-&-1&-GOLGA4		0.382259	0.0666667	23	4		FALSE		GOLGA4	GOLGA4	177.286		0	22	0	0.730662	FALSE	1	GOLGA4	71674		0.058043
596884	taxon:9606	2.62462		2.534e-05	180587	1902	golgin A3	gene	biological_process-&-1&-GO:0006891-&&-intra-Golgi vesicle-mediated transport-%%-GO:0007283-&&-spermatogenesis|cellular_component-&-1&-GO:0005634-&&-nucleus-%%-GO:0000139-&&-Golgi membrane-%%-GO:0090498-&&-extrinsic component of Golgi membrane-%%-GO:0032580-&&-Golgi cisterna membrane-%%-GO:0005829-&&-cytosol-%%-GO:0005654-&&-nucleoplasm-%%-GO:0005730-&&-nucleolus-%%-GO:0017119-&&-Golgi transport c…	G:9606:GOLGA3		FALSE		GOLGA3	Homo sapiens (Human)-&&-9606	Gene Symbol-&-1&-GOLGA3		0.381008	0.07	27	4		FALSE		GOLGA3	GOLGA3	211.2		0	26	0	0.729231	FALSE	1	GOLGA3	66044		0.0705552
596885	taxon:9606	2.73897		6.023e-05	180584	1902	glutamic-oxaloacetic transaminase 1	gene	biological_process-&-1&-GO:0055089-&&-fatty acid homeostasis-%%-GO:0007219-&&-Notch signaling pathway-%%-GO:0006531-&&-aspartate metabolic process-%%-GO:0032869-&&-cellular response to insulin stimulus-%%-GO:0019551-&&-glutamate catabolic process to 2-oxoglutarate-%%-GO:0006094-&&-gluconeogenesis-%%-GO:0006114-&&-glycerol biosynthetic process-%%-GO:0006533-&&-aspartate catabolic process-%%-GO:000…	G:9606:GOT1		FALSE	KEGG-&-1&-hsa01210-&&-2-Oxocarboxylic acid metabolism-%%-hsa00350-&&-Tyrosine metabolism-%%-hsa00250-&&-Alanine, aspartate and glutamate metabolism-%%-hsa00270-&&-Cysteine and methionine metabolism-%%-hsa01100-&&-Metabolic pathways-%%-hsa01200-&&-Carbon metabolism-%%-hsa00220-&&-Arginine biosynthesis-%%-hsa00400-&&-Phenylalanine, tyrosine and tryptophan biosynthesis-%%-hsa01230-&&-Biosynthesis of…	GOT1	Homo sapiens (Human)-&&-9606	Gene Symbol-&-1&-GOT1		0.3651	0.101064	48	4		FALSE		GOT1	GOT1	77.3958		0	48	0	0.710171	FALSE	0	GOT1	104680		0.0372053
596886	taxon:9606	2.69141		2.726e-05	180585	1902	golgin B1	gene	biological_process-&-1&-GO:0007030-&&-Golgi organization-%%-GO:0006355-&&-regulation of transcription, DNA-templated-%%-GO:1905793-&&-protein localization to pericentriolar material-%%-GO:0006888-&&-ER to Golgi vesicle-mediated transport|cellular_component-&-1&-GO:0000139-&&-Golgi membrane-%%-GO:0016021-&&-integral component of membrane-%%-GO:0005795-&&-Golgi stack-%%-GO:0005801-&&-cis-Golgi netw…	G:9606:GOLGB1		FALSE		GOLGB1	Homo sapiens (Human)-&&-9606	Gene Symbol-&-1&-GOLGB1		0.371552	0.05	25	5		FALSE		GOLGB1	GOLGB1	177.88		0	25	0	0.718098	FALSE	0	GOLGB1	62144		0.0722019
596887	taxon:9606	2.74718		3.481e-05	180590	1902	glucosamine (N-acetyl)-6-sulfatase	gene	biological_process-&-1&-GO:0043312-&&-neutrophil degranulation-%%-GO:0006027-&&-glycosaminoglycan catabolic process-%%-GO:0042340-&&-keratan sulfate catabolic process|cellular_component-&-1&-GO:0005576-&&-extracellular region-%%-GO:1904813-&&-ficolin-1-rich granule lumen-%%-GO:0070062-&&-extracellular exosome-%%-GO:0035578-&&-azurophil granule lumen-%%-GO:0043202-&&-lysosomal lumen|molecular_func…	G:9606:GNS		FALSE	KEGG-&-1&-hsa00531-&&-Glycosaminoglycan degradation-%%-hsa04142-&&-Lysosome-%%-hsa01100-&&-Metabolic pathways	GNS	Homo sapiens (Human)-&&-9606	Gene Symbol-&-1&-GNS		0.36401	0.216667	25	4		FALSE		GNS	GNS	142.24		0	25	0	0.708803	FALSE	0	GNS	64342		0.0705357
596888	taxon:9606	2.33731	1260.96	0.00164272	180588	1902	golgin A2	gene	biological_process-&-1&-GO:0007020-&&-microtubule nucleation-%%-GO:0090166-&&-Golgi disassembly-%%-GO:0051297-&&-centrosome organization-%%-GO:0010507-&&-negative regulation of autophagy-%%-GO:0006486-&&-protein glycosylation-%%-GO:0051225-&&-spindle assembly-%%-GO:0090307-&&-mitotic spindle assembly-%%-GO:0006888-&&-ER to Golgi vesicle-mediated transport-%%-GO:0060050-&&-positive regulation of p…	G:9606:GOLGA2		FALSE		GOLGA2	Homo sapiens (Human)-&&-9606	Gene Symbol-&-1&-GOLGA2	0.504584	0.427843	0.0224299	215	4	0.0120006	FALSE	7.23881	GOLGA2	GOLGA2	85.7395	8.46584	0	215	0	0.777115	FALSE	0	GOLGA2	2990802	Infinity	0.017316
596889	taxon:9606	2.745		3.63e-06	164210	1902	CD300 molecule like family member f	gene	biological_process-&-1&-GO:0034125-&&-negative regulation of MyD88-dependent toll-like receptor signaling pathway-%%-GO:2000427-&&-positive regulation of apoptotic cell clearance-%%-GO:2000426-&&-negative regulation of apoptotic cell clearance-%%-GO:0050776-&&-regulation of immune response-%%-GO:0035666-&&-TRIF-dependent toll-like receptor signaling pathway-%%-GO:0033004-&&-negative regulation of…	G:9606:CD300LF		FALSE		CD300LF	Homo sapiens (Human)-&&-9606	Gene Symbol-&-1&-CD300LF		0.364299	0	3	4		FALSE		CD300LF	CD300LF	762		0	3	0	0.709167	FALSE	0	CD300LF	6876		0.341103
596890	taxon:9606	2.76667		0	180592	1902	gonadotropin releasing hormone 2	gene	biological_process-&-1&-GO:0007165-&&-signal transduction-%%-GO:0007275-&&-multicellular organism development|cellular_component-&-1&-GO:0005576-&&-extracellular region|molecular_function-&-1&-GO:0005179-&&-hormone activity	G:9606:GNRH2		FALSE	KEGG-&-1&-hsa04912-&&-GnRH signaling pathway-%%-hsa04080-&&-Neuroactive ligand-receptor interaction	GNRH2	Homo sapiens (Human)-&&-9606	Gene Symbol-&-1&-GNRH2		0.361446	0	1	4		FALSE		GNRH2	GNRH2	2132		0	1	0	0.705556	FALSE	0	GNRH2	0		0
596891	taxon:9606	2.87744		0	164208	1902	dynein axonemal heavy chain 2	gene	biological_process-&-1&-GO:0007018-&&-microtubule-based movement-%%-GO:0060285-&&-cilium-dependent cell motility|cellular_component-&-1&-GO:0005737-&&-cytoplasm-%%-GO:0005874-&&-microtubule-%%-GO:0005858-&&-axonemal dynein complex|molecular_function-&-1&-GO:0003777-&&-microtubule motor activity-%%-GO:0005524-&&-ATP binding-%%-GO:0016887-&&-ATPase activity	G:9606:DNAH2		FALSE	KEGG-&-1&-hsa05016-&&-Huntington disease	DNAH2	Homo sapiens (Human)-&&-9606	Gene Symbol-&-1&-DNAH2		0.347532	1	2	4		FALSE		DNAH2	DNAH2	702.5		0	2	0	0.687094	FALSE	0	DNAH2	0		0.585905
596892	taxon:9606	2.47756		3.913e-05	164214	1902	target of myb1 like 2 membrane trafficking protein	gene	biological_process-&-1&-GO:0045839-&&-negative regulation of mitotic nuclear division-%%-GO:0006886-&&-intracellular protein transport-%%-GO:0007165-&&-signal transduction|cellular_component-&-1&-GO:0070062-&&-extracellular exosome-%%-GO:0005622-&&-intracellular|molecular_function-&-1&-GO:0030276-&&-clathrin binding-%%-GO:0019901-&&-protein kinase binding-%%-GO:0005515-&&-protein binding	G:9606:TOM1L2		FALSE		TOM1L2	Homo sapiens (Human)-&&-9606	Gene Symbol-&-1&-TOM1L2		0.403622	0.108696	24	4		FALSE		TOM1L2	TOM1L2	264.292		0	24	0	0.753739	FALSE	0	TOM1L2	101252		0.0647467
596893	taxon:9606	2.55		2.624e-05	164213	1902	TEPSIN, adaptor related protein complex 4 accessory protein	gene	cellular_component-&-1&-GO:0005829-&&-cytosol-%%-GO:0031965-&&-nuclear membrane-%%-GO:0016607-&&-nuclear speck-%%-GO:0005794-&&-Golgi apparatus-%%-GO:0031410-&&-cytoplasmic vesicle	G:9606:TEPSIN		FALSE		TEPSIN	Homo sapiens (Human)-&&-9606	Gene Symbol-&-1&-TEPSIN		0.392157	0.0666667	21	4		FALSE		TEPSIN	TEPSIN	235.381		0	21	0	0.741667	FALSE	0	TEPSIN	69074		0.0662106
596894	taxon:9606	2.94038		2.54e-06	180597	1902	G protein subunit gamma 11	gene	biological_process-&-1&-GO:0071377-&&-cellular response to glucagon stimulus-%%-GO:0007165-&&-signal transduction-%%-GO:0007186-&&-G-protein coupled receptor signaling pathway|cellular_component-&-1&-GO:0005834-&&-heterotrimeric G-protein complex-%%-GO:0005886-&&-plasma membrane|molecular_function-&-1&-GO:0004871-&&-signal transducer activity-%%-GO:0003924-&&-GTPase activity	G:9606:GNG11		FALSE	KEGG-&-1&-hsa04725-&&-Cholinergic synapse-%%-hsa04062-&&-Chemokine signaling pathway-%%-hsa05163-&&-Human cytomegalovirus infection-%%-hsa05170-&&-Human immunodeficiency virus 1 infection-%%-hsa04726-&&-Serotonergic synapse-%%-hsa04724-&&-Glutamatergic synapse-%%-hsa04728-&&-Dopaminergic synapse-%%-hsa05167-&&-Kaposi sarcoma-associated herpesvirus infection-%%-hsa04014-&&-Ras signaling pathway-%%…	GNG11	Homo sapiens (Human)-&&-9606	Gene Symbol-&-1&-GNG11		0.340092	0.0714286	8	4		FALSE		GNG11	GNG11	123.375		0	8	0	0.676603	FALSE	0	GNG11	5646		0.140768
596895	taxon:9606	2.98256		1.43e-06	180602	1902	G protein subunit gamma 4	gene	biological_process-&-1&-GO:0008277-&&-regulation of G-protein coupled receptor protein signaling pathway-%%-GO:0030308-&&-negative regulation of cell growth-%%-GO:0071377-&&-cellular response to glucagon stimulus-%%-GO:0007186-&&-G-protein coupled receptor signaling pathway|cellular_component-&-1&-GO:0005834-&&-heterotrimeric G-protein complex-%%-GO:0070062-&&-extracellular exosome-%%-GO:0005886-…	G:9606:GNG4		FALSE	KEGG-&-1&-hsa04725-&&-Cholinergic synapse-%%-hsa04062-&&-Chemokine signaling pathway-%%-hsa04726-&&-Serotonergic synapse-%%-hsa05163-&&-Human cytomegalovirus infection-%%-hsa05170-&&-Human immunodeficiency virus 1 infection-%%-hsa04724-&&-Glutamatergic synapse-%%-hsa04728-&&-Dopaminergic synapse-%%-hsa05167-&&-Kaposi sarcoma-associated herpesvirus infection-%%-hsa04014-&&-Ras signaling pathway-%%…	GNG4	Homo sapiens (Human)-&&-9606	Gene Symbol-&-1&-GNG4		0.335282	0.361111	9	4		FALSE		GNG4	GNG4	81.8889		0	9	0	0.669573	FALSE	0	GNG4	2968		0.149027
596896	taxon:9606	2.85692		1.247e-05	180601	1902	G protein subunit gamma 5	gene	biological_process-&-1&-GO:0007165-&&-signal transduction-%%-GO:0071377-&&-cellular response to glucagon stimulus-%%-GO:0007186-&&-G-protein coupled receptor signaling pathway-%%-GO:2000179-&&-positive regulation of neural precursor cell proliferation-%%-GO:0072513-&&-positive regulation of secondary heart field cardioblast proliferation|cellular_component-&-1&-GO:0070062-&&-extracellular exosome…	G:9606:GNG5		FALSE	KEGG-&-1&-hsa04725-&&-Cholinergic synapse-%%-hsa04726-&&-Serotonergic synapse-%%-hsa04062-&&-Chemokine signaling pathway-%%-hsa05170-&&-Human immunodeficiency virus 1 infection-%%-hsa05163-&&-Human cytomegalovirus infection-%%-hsa04724-&&-Glutamatergic synapse-%%-hsa04728-&&-Dopaminergic synapse-%%-hsa05167-&&-Kaposi sarcoma-associated herpesvirus infection-%%-hsa04014-&&-Ras signaling pathway-%%…	GNG5	Homo sapiens (Human)-&&-9606	Gene Symbol-&-1&-GNG5		0.350027	0.111111	18	4		FALSE		GNG5	GNG5	99.6111		0	18	0	0.690513	FALSE	0	GNG5	25768		0.0777778
596897	taxon:9606	2.44923		0.00026578	180606	1902	G protein subunit beta 1	gene	biological_process-&-1&-GO:0007204-&&-positive regulation of cytosolic calcium ion concentration-%%-GO:0006457-&&-protein folding-%%-GO:0007165-&&-signal transduction-%%-GO:0007213-&&-G-protein coupled acetylcholine receptor signaling pathway-%%-GO:0007191-&&-adenylate cyclase-activating dopamine receptor signaling pathway-%%-GO:0050909-&&-sensory perception of taste-%%-GO:0071380-&&-cellular res…	G:9606:GNB1		FALSE	KEGG-&-1&-hsa04725-&&-Cholinergic synapse-%%-hsa04726-&&-Serotonergic synapse-%%-hsa05170-&&-Human immunodeficiency virus 1 infection-%%-hsa05163-&&-Human cytomegalovirus infection-%%-hsa04062-&&-Chemokine signaling pathway-%%-hsa04724-&&-Glutamatergic synapse-%%-hsa04728-&&-Dopaminergic synapse-%%-hsa05167-&&-Kaposi sarcoma-associated herpesvirus infection-%%-hsa04744-&&-Phototransduction-%%-hsa…	GNB1	Homo sapiens (Human)-&&-9606	Gene Symbol-&-1&-GNB1		0.408291	0.0687371	70	4		FALSE		GNB1	GNB1	155.614		0	70	0	0.758462	FALSE	0	GNB1	503582		0.0366779
596898	taxon:9606	2.6059		0.00015762	180607	1902	G protein subunit alpha z	gene	biological_process-&-1&-GO:0006457-&&-protein folding-%%-GO:0007193-&&-adenylate cyclase-inhibiting G-protein coupled receptor signaling pathway-%%-GO:0007186-&&-G-protein coupled receptor signaling pathway-%%-GO:0007188-&&-adenylate cyclase-modulating G-protein coupled receptor signaling pathway|cellular_component-&-1&-GO:0070062-&&-extracellular exosome-%%-GO:0005886-&&-plasma membrane-%%-GO:00…	G:9606:GNAZ		FALSE	KEGG-&-1&-hsa04730-&&-Long-term depression	GNAZ	Homo sapiens (Human)-&&-9606	Gene Symbol-&-1&-GNAZ		0.383745	0.0265152	35	4		FALSE		GNAZ	GNAZ	119.364		0	34	0	0.73235	FALSE	1	GNAZ	182418		0.0385872
596899	taxon:9606	2.38859	392.638	0.00024968	180605	1902	G protein subunit beta 2	gene	biological_process-&-1&-GO:0006457-&&-protein folding-%%-GO:0071377-&&-cellular response to glucagon stimulus-%%-GO:0007186-&&-G-protein coupled receptor signaling pathway-%%-GO:0065009-&&-regulation of molecular function|cellular_component-&-1&-GO:0005765-&&-lysosomal membrane-%%-GO:0048471-&&-perinuclear region of cytoplasm-%%-GO:0070062-&&-extracellular exosome-%%-GO:0043209-&&-myelin sheath-%…	G:9606:GNB2		FALSE	KEGG-&-1&-hsa04725-&&-Cholinergic synapse-%%-hsa05163-&&-Human cytomegalovirus infection-%%-hsa04062-&&-Chemokine signaling pathway-%%-hsa05170-&&-Human immunodeficiency virus 1 infection-%%-hsa04726-&&-Serotonergic synapse-%%-hsa04724-&&-Glutamatergic synapse-%%-hsa04728-&&-Dopaminergic synapse-%%-hsa05167-&&-Kaposi sarcoma-associated herpesvirus infection-%%-hsa04014-&&-Ras signaling pathway-%%…	GNB2	Homo sapiens (Human)-&&-9606	Gene Symbol-&-1&-GNB2	0.500948	0.418657	0.0913817	86	4	0.014733	FALSE	9.89655	GNB2	GNB2	192	10.4284	0	86	0	0.768568	FALSE	0	GNB2	638858	Infinity	0.0408387
596900	taxon:9606	2.68885		1.96e-05	180608	1902	G protein subunit alpha transducin 2	gene	biological_process-&-1&-GO:0007204-&&-positive regulation of cytosolic calcium ion concentration-%%-GO:0006457-&&-protein folding-%%-GO:0007186-&&-G-protein coupled receptor signaling pathway-%%-GO:0007601-&&-visual perception-%%-GO:0007223-&&-Wnt signaling pathway, calcium modulating pathway-%%-GO:0007188-&&-adenylate cyclase-modulating G-protein coupled receptor signaling pathway-%%-GO:0001580-…	G:9606:GNAT2		FALSE	KEGG-&-1&-hsa04744-&&-Phototransduction	GNAT2	Homo sapiens (Human)-&&-9606	Gene Symbol-&-1&-GNAT2		0.371907	0.106061	12	4		FALSE		GNAT2	GNAT2	231.167		0	12	0	0.718526	FALSE	0	GNAT2	30536		0.0900286
596901	taxon:9606	2.49538	69.0706	0.00041672	180615	1902	G protein subunit alpha i3	gene	biological_process-&-1&-GO:0006457-&&-protein folding-%%-GO:0007194-&&-negative regulation of adenylate cyclase activity-%%-GO:0051301-&&-cell division-%%-GO:0007212-&&-dopamine receptor signaling pathway-%%-GO:0006906-&&-vesicle fusion-%%-GO:0007193-&&-adenylate cyclase-inhibiting G-protein coupled receptor signaling pathway-%%-GO:0007049-&&-cell cycle-%%-GO:0046039-&&-GTP metabolic process-%%-G…	G:9606:GNAI3		FALSE	KEGG-&-1&-hsa04916-&&-Melanogenesis-%%-hsa04062-&&-Chemokine signaling pathway-%%-hsa05142-&&-Chagas disease (American trypanosomiasis)-%%-hsa04926-&&-Relaxin signaling pathway-%%-hsa04022-&&-cGMP-PKG signaling pathway-%%-hsa05032-&&-Morphine addiction-%%-hsa04670-&&-Leukocyte transendothelial migration-%%-hsa04723-&&-Retrograde endocannabinoid signaling-%%-hsa05145-&&-Toxoplasmosis-%%-hsa04360-&…	GNAI3	Homo sapiens (Human)-&&-9606	Gene Symbol-&-1&-GNAI3	0.471954	0.40074	0.0766383	76	4	0.0059325	FALSE	7.58333	GNAI3	GNAI3	119.311	7.91304	0	75	0	0.750769	FALSE	1	GNAI3	627438	Infinity	0.030703
596902	taxon:9606	2.78179		0.0001219	180612	1902	G protein subunit alpha q	gene	biological_process-&-1&-GO:0016322-&&-neuron remodeling-%%-GO:0048066-&&-developmental pigmentation-%%-GO:0006469-&&-negative regulation of protein kinase activity-%%-GO:0007507-&&-heart development-%%-GO:0009649-&&-entrainment of circadian clock-%%-GO:0042711-&&-maternal behavior-%%-GO:0007596-&&-blood coagulation-%%-GO:0007215-&&-glutamate receptor signaling pathway-%%-GO:0007189-&&-adenylate c…	G:9606:GNAQ		FALSE	KEGG-&-1&-hsa04916-&&-Melanogenesis-%%-hsa04270-&&-Vascular smooth muscle contraction-%%-hsa05142-&&-Chagas disease (American trypanosomiasis)-%%-hsa04918-&&-Thyroid hormone synthesis-%%-hsa05146-&&-Amoebiasis-%%-hsa04022-&&-cGMP-PKG signaling pathway-%%-hsa04723-&&-Retrograde endocannabinoid signaling-%%-hsa04970-&&-Salivary secretion-%%-hsa04961-&&-Endocrine and other factor-regulated calcium r…	GNAQ	Homo sapiens (Human)-&&-9606	Gene Symbol-&-1&-GNAQ		0.35948	0.0248869	54	4		FALSE		GNAQ	GNAQ	53.8846		0	53	0	0.703034	FALSE	1	GNAQ	177626		0.0310531
596903	taxon:9606	2.4991		0.00024265	180613	1902	G protein subunit alpha o1	gene	biological_process-&-1&-GO:0042542-&&-response to hydrogen peroxide-%%-GO:0006457-&&-protein folding-%%-GO:0034097-&&-response to cytokine-%%-GO:0008016-&&-regulation of heart contraction-%%-GO:0051926-&&-negative regulation of calcium ion transport-%%-GO:0007188-&&-adenylate cyclase-modulating G-protein coupled receptor signaling pathway-%%-GO:0042493-&&-response to drug-%%-GO:0043547-&&-positiv…	G:9606:GNAO1		FALSE	KEGG-&-1&-hsa04916-&&-Melanogenesis-%%-hsa04725-&&-Cholinergic synapse-%%-hsa04726-&&-Serotonergic synapse-%%-hsa05163-&&-Human cytomegalovirus infection-%%-hsa05170-&&-Human immunodeficiency virus 1 infection-%%-hsa04724-&&-Glutamatergic synapse-%%-hsa05142-&&-Chagas disease (American trypanosomiasis)-%%-hsa04728-&&-Dopaminergic synapse-%%-hsa04730-&&-Long-term depression-%%-hsa04727-&&-GABAergi…	GNAO1	Homo sapiens (Human)-&&-9606	Gene Symbol-&-1&-GNAO1		0.400144	0.106349	38	4		FALSE		GNAO1	GNAO1	148.556		0	37	0	0.75015	FALSE	1	GNAO1	267240		0.037837
596904	taxon:9606	2.70795		0.00018329	180618	1902	G protein subunit alpha i1	gene	biological_process-&-1&-GO:0006457-&&-protein folding-%%-GO:0051301-&&-cell division-%%-GO:0007188-&&-adenylate cyclase-modulating G-protein coupled receptor signaling pathway-%%-GO:0043434-&&-response to peptide hormone-%%-GO:0007186-&&-G-protein coupled receptor signaling pathway-%%-GO:1904322-&&-cellular response to forskolin-%%-GO:0043949-&&-regulation of cAMP-mediated signaling-%%-GO:0007193…	G:9606:GNAI1		FALSE	KEGG-&-1&-hsa04916-&&-Melanogenesis-%%-hsa04062-&&-Chemokine signaling pathway-%%-hsa05142-&&-Chagas disease (American trypanosomiasis)-%%-hsa04926-&&-Relaxin signaling pathway-%%-hsa05032-&&-Morphine addiction-%%-hsa04022-&&-cGMP-PKG signaling pathway-%%-hsa04670-&&-Leukocyte transendothelial migration-%%-hsa04723-&&-Retrograde endocannabinoid signaling-%%-hsa05145-&&-Toxoplasmosis-%%-hsa04360-&…	GNAI1	Homo sapiens (Human)-&&-9606	Gene Symbol-&-1&-GNAI1		0.369283	0.0649038	67	4		FALSE		GNAI1	GNAI1	63.4		0	66	0	0.715342	FALSE	1	GNAI1	269994		0.0280198
596905	taxon:9606	2.6591		8e-07	164234	1902	ring finger protein 151	gene	biological_process-&-1&-GO:0007283-&&-spermatogenesis-%%-GO:0016567-&&-protein ubiquitination-%%-GO:0030154-&&-cell differentiation|cellular_component-&-1&-GO:0005737-&&-cytoplasm-%%-GO:0005634-&&-nucleus|molecular_function-&-1&-GO:0008270-&&-zinc ion binding-%%-GO:0004842-&&-ubiquitin-protein transferase activity	G:9606:RNF151		FALSE		RNF151	Homo sapiens (Human)-&&-9606	Gene Symbol-&-1&-RNF151		0.376067	0.333333	3	4		FALSE		RNF151	RNF151	1018		0	3	0	0.723483	FALSE	0	RNF151	9344		0.367389
596906	taxon:9606	2.64333		9.774e-05	180619	1902	G protein subunit alpha 15	gene	biological_process-&-1&-GO:0007207-&&-phospholipase C-activating G-protein coupled acetylcholine receptor signaling pathway-%%-GO:0030168-&&-platelet activation-%%-GO:0007204-&&-positive regulation of cytosolic calcium ion concentration-%%-GO:0060158-&&-phospholipase C-activating dopamine receptor signaling pathway-%%-GO:0007202-&&-activation of phospholipase C activity-%%-GO:0007188-&&-adenylate…	G:9606:GNA15		FALSE	KEGG-&-1&-hsa04926-&&-Relaxin signaling pathway-%%-hsa04020-&&-Calcium signaling pathway-%%-hsa05142-&&-Chagas disease (American trypanosomiasis)-%%-hsa05146-&&-Amoebiasis	GNA15	Homo sapiens (Human)-&&-9606	Gene Symbol-&-1&-GNA15		0.37831	0.133333	15	4		FALSE		GNA15	GNA15	222.4		0	15	0	0.726111	FALSE	0	GNA15	84366		0.07777
596907	taxon:9606	2.45615	753.257	0.00075125	180617	1902	G protein subunit alpha i2	gene	biological_process-&-1&-GO:0006457-&&-protein folding-%%-GO:0007194-&&-negative regulation of adenylate cyclase activity-%%-GO:0051301-&&-cell division-%%-GO:0001973-&&-adenosine receptor signaling pathway-%%-GO:0007165-&&-signal transduction-%%-GO:0007213-&&-G-protein coupled acetylcholine receptor signaling pathway-%%-GO:0007193-&&-adenylate cyclase-inhibiting G-protein coupled receptor signali…	G:9606:GNAI2		FALSE	KEGG-&-1&-hsa04916-&&-Melanogenesis-%%-hsa04062-&&-Chemokine signaling pathway-%%-hsa05142-&&-Chagas disease (American trypanosomiasis)-%%-hsa04926-&&-Relaxin signaling pathway-%%-hsa05032-&&-Morphine addiction-%%-hsa04022-&&-cGMP-PKG signaling pathway-%%-hsa04670-&&-Leukocyte transendothelial migration-%%-hsa04723-&&-Retrograde endocannabinoid signaling-%%-hsa05145-&&-Toxoplasmosis-%%-hsa04360-&…	GNAI2	Homo sapiens (Human)-&&-9606	Gene Symbol-&-1&-GNAI2	0.486019	0.407141	0.0605617	91	4	0.00824476	FALSE	6.16279	GNAI2	GNAI2	122.747	6.69868	0	91	0	0.757308	FALSE	0	GNAI2	1221774	Infinity	0.0295111
596908	taxon:9606	2.75244		1.81e-06	164238	1902	CKLF like MARVEL transmembrane domain containing 2	gene	biological_process-&-1&-GO:0006935-&&-chemotaxis|cellular_component-&-1&-GO:0005615-&&-extracellular space-%%-GO:0016021-&&-integral component of membrane|molecular_function-&-1&-GO:0005125-&&-cytokine activity	G:9606:CMTM2		FALSE		CMTM2	Homo sapiens (Human)-&&-9606	Gene Symbol-&-1&-CMTM2		0.363315	0	2	4		FALSE		CMTM2	CMTM2	1100		0	2	0	0.707927	FALSE	0	CMTM2	2750		0.502285
596909	taxon:9606	2.52603		6.988e-05	180620	1902	G protein subunit alpha 12	gene	biological_process-&-1&-GO:0030168-&&-platelet activation-%%-GO:0001701-&&-in utero embryonic development-%%-GO:0007266-&&-Rho protein signal transduction-%%-GO:0008360-&&-regulation of cell shape-%%-GO:0010762-&&-regulation of fibroblast migration-%%-GO:0030154-&&-cell differentiation-%%-GO:0007596-&&-blood coagulation-%%-GO:0007186-&&-G-protein coupled receptor signaling pathway-%%-GO:0007188-&…	G:9606:GNA12		FALSE	KEGG-&-1&-hsa04022-&&-cGMP-PKG signaling pathway-%%-hsa04071-&&-Sphingolipid signaling pathway-%%-hsa05163-&&-Human cytomegalovirus infection-%%-hsa04270-&&-Vascular smooth muscle contraction-%%-hsa04010-&&-MAPK signaling pathway-%%-hsa04072-&&-Phospholipase D signaling pathway-%%-hsa04928-&&-Parathyroid hormone synthesis, secretion and action-%%-hsa04730-&&-Long-term depression-%%-hsa05200-&&-Pa…	GNA12	Homo sapiens (Human)-&&-9606	Gene Symbol-&-1&-GNA12		0.395879	0.134921	30	4		FALSE		GNA12	GNA12	187.893		0	29	0	0.745662	FALSE	1	GNA12	105130		0.0508822
596910	taxon:9606	2.85551		4.028e-05	180621	1902	G protein subunit alpha 11	gene	biological_process-&-1&-GO:0048066-&&-developmental pigmentation-%%-GO:0007213-&&-G-protein coupled acetylcholine receptor signaling pathway-%%-GO:0030168-&&-platelet activation-%%-GO:0007507-&&-heart development-%%-GO:0060158-&&-phospholipase C-activating dopamine receptor signaling pathway-%%-GO:0009649-&&-entrainment of circadian clock-%%-GO:0007165-&&-signal transduction-%%-GO:0007188-&&-aden…	G:9606:GNA11		FALSE	KEGG-&-1&-hsa04725-&&-Cholinergic synapse-%%-hsa04912-&&-GnRH signaling pathway-%%-hsa05170-&&-Human immunodeficiency virus 1 infection-%%-hsa05163-&&-Human cytomegalovirus infection-%%-hsa04270-&&-Vascular smooth muscle contraction-%%-hsa05142-&&-Chagas disease (American trypanosomiasis)-%%-hsa04925-&&-Aldosterone synthesis and secretion-%%-hsa04928-&&-Parathyroid hormone synthesis, secretion an…	GNA11	Homo sapiens (Human)-&&-9606	Gene Symbol-&-1&-GNA11		0.3502	0.0344828	30	4		FALSE		GNA11	GNA11	57.7667		0	30	0	0.690748	FALSE	0	GNA11	61672		0.0459705
596911	taxon:9606	2.77987		1.563e-05	180624	1902	glia maturation factor beta	gene	biological_process-&-1&-GO:0007612-&&-learning-%%-GO:0007626-&&-locomotory behavior-%%-GO:0007165-&&-signal transduction-%%-GO:0007399-&&-nervous system development-%%-GO:0034316-&&-negative regulation of Arp2/3 complex-mediated actin nucleation-%%-GO:0043085-&&-positive regulation of catalytic activity-%%-GO:0006468-&&-protein phosphorylation-%%-GO:0006469-&&-negative regulation of protein kinas…	G:9606:GMFB		FALSE		GMFB	Homo sapiens (Human)-&&-9606	Gene Symbol-&-1&-GMFB		0.359729	0.0769231	14	4		FALSE		GMFB	GMFB	192.643		0	14	0	0.703355	FALSE	0	GMFB	27286		0.107342
596912	taxon:9606	2.56795		5.596e-05	180634	1902	glutamate dehydrogenase 1 pseudogene 5	gene		G:9606:GLUD1P5		FALSE		GLUD1P5	Homo sapiens (Human)-&&-9606	Gene Symbol-&-1&-GLUD1P5		0.389416	0.155242	34	4		FALSE		GLUD1P5	GLUD1P5	265.5		0	33	0	0.738675	FALSE	1	GLUD1P5	128896		0.0782493
596913	taxon:9606	2.70628		5.654e-05	180633	1902	glutamate-ammonia ligase	gene	biological_process-&-1&-GO:0001504-&&-neurotransmitter uptake-%%-GO:0050679-&&-positive regulation of epithelial cell proliferation-%%-GO:0019676-&&-ammonia assimilation cycle-%%-GO:0006538-&&-glutamate catabolic process-%%-GO:0051968-&&-positive regulation of synaptic transmission, glutamatergic-%%-GO:0006542-&&-glutamine biosynthetic process-%%-GO:0008283-&&-cell proliferation-%%-GO:0051260-&&-…	G:9606:GLUL	GLUL	TRUE	KEGG-&-1&-hsa00250-&&-Alanine, aspartate and glutamate metabolism-%%-hsa04724-&&-Glutamatergic synapse-%%-hsa01100-&&-Metabolic pathways-%%-hsa00220-&&-Arginine biosynthesis-%%-hsa01230-&&-Biosynthesis of amino acids-%%-hsa04217-&&-Necroptosis-%%-hsa00630-&&-Glyoxylate and dicarboxylate metabolism-%%-hsa00910-&&-Nitrogen metabolism-%%-hsa04727-&&-GABAergic synapse	GLUL	Homo sapiens (Human)-&&-9606	Gene Symbol-&-1&-GLUL		0.369511	0.0769231	28	4		FALSE		GLUL	GLUL	139.269		0	27	0	0.71562	FALSE	1	GLUL	96046		0.0594944
596914	taxon:9606	2.56795		5.596e-05	180638	1902	glutamate dehydrogenase 1	gene	biological_process-&-1&-GO:0008652-&&-cellular amino acid biosynthetic process-%%-GO:0006538-&&-glutamate catabolic process-%%-GO:0055114-&&-oxidation-reduction process-%%-GO:0021762-&&-substantia nigra development-%%-GO:0006537-&&-glutamate biosynthetic process-%%-GO:0006541-&&-glutamine metabolic process-%%-GO:0032024-&&-positive regulation of insulin secretion-%%-GO:0072350-&&-tricarboxylic ac…	G:9606:GLUD1		FALSE	KEGG-&-1&-hsa00250-&&-Alanine, aspartate and glutamate metabolism-%%-hsa01100-&&-Metabolic pathways-%%-hsa00471-&&-D-Glutamine and D-glutamate metabolism-%%-hsa01200-&&-Carbon metabolism-%%-hsa00220-&&-Arginine biosynthesis-%%-hsa04964-&&-Proximal tubule bicarbonate reclamation-%%-hsa04217-&&-Necroptosis-%%-hsa00910-&&-Nitrogen metabolism	GLUD1	Homo sapiens (Human)-&&-9606	Gene Symbol-&-1&-GLUD1		0.389416	0.155242	34	4		FALSE		GLUD1	GLUD1	265.5		0	33	0	0.738675	FALSE	1	GLUD1	128896		0.0782493
596915	taxon:9606	2.83936		1.028e-05	180639	1902	glutaredoxin	gene	biological_process-&-1&-GO:0080058-&&-protein deglutathionylation-%%-GO:0055114-&&-oxidation-reduction process-%%-GO:0015949-&&-nucleobase-containing small molecule interconversion-%%-GO:0045838-&&-positive regulation of membrane potential-%%-GO:2000651-&&-positive regulation of sodium ion transmembrane transporter activity-%%-GO:0045454-&&-cell redox homeostasis|cellular_component-&-1&-GO:000582…	G:9606:GLRX		FALSE		GLRX	Homo sapiens (Human)-&&-9606	Gene Symbol-&-1&-GLRX		0.352192	0.0857143	15	4		FALSE		GLRX	GLRX	121.333		0	15	0	0.69344	FALSE	0	GLRX	20124		0.0862577
596916	taxon:9606	2.76949		2.74e-06	180637	1902	glutamate dehydrogenase 2	gene	biological_process-&-1&-GO:0006536-&&-glutamate metabolic process-%%-GO:0006538-&&-glutamate catabolic process-%%-GO:0006537-&&-glutamate biosynthetic process-%%-GO:0055114-&&-oxidation-reduction process|cellular_component-&-1&-GO:0005737-&&-cytoplasm-%%-GO:0005739-&&-mitochondrion|molecular_function-&-1&-GO:0004353-&&-glutamate dehydrogenase [NAD(P)+] activity-%%-GO:0005525-&&-GTP binding-%%-GO:…	G:9606:GLUD2		FALSE	KEGG-&-1&-hsa00250-&&-Alanine, aspartate and glutamate metabolism-%%-hsa01100-&&-Metabolic pathways-%%-hsa00471-&&-D-Glutamine and D-glutamate metabolism-%%-hsa01200-&&-Carbon metabolism-%%-hsa00220-&&-Arginine biosynthesis-%%-hsa04964-&&-Proximal tubule bicarbonate reclamation-%%-hsa04217-&&-Necroptosis-%%-hsa00910-&&-Nitrogen metabolism	GLUD2	Homo sapiens (Human)-&&-9606	Gene Symbol-&-1&-GLUD2		0.361078	0.0888889	12	4		FALSE		GLUD2	GLUD2	270.8		0	11	0	0.705085	FALSE	1	GLUD2	9610		0.138544
596917	taxon:9606	2.76077		5.11e-05	180640	1902	glutaminase	gene	biological_process-&-1&-GO:0007268-&&-chemical synaptic transmission-%%-GO:0014047-&&-glutamate secretion-%%-GO:0002087-&&-regulation of respiratory gaseous exchange by neurological system process-%%-GO:0008652-&&-cellular amino acid biosynthetic process-%%-GO:0001967-&&-suckling behavior-%%-GO:0006537-&&-glutamate biosynthetic process-%%-GO:0051289-&&-protein homotetramerization-%%-GO:0006543-&&…	G:9606:GLS	GLS	TRUE	KEGG-&-1&-hsa00250-&&-Alanine, aspartate and glutamate metabolism-%%-hsa05206-&&-MicroRNAs in cancer-%%-hsa05230-&&-Central carbon metabolism in cancer-%%-hsa04724-&&-Glutamatergic synapse-%%-hsa01100-&&-Metabolic pathways-%%-hsa00471-&&-D-Glutamine and D-glutamate metabolism-%%-hsa00220-&&-Arginine biosynthesis-%%-hsa04964-&&-Proximal tubule bicarbonate reclamation-%%-hsa04727-&&-GABAergic synap…	GLS	Homo sapiens (Human)-&&-9606	Gene Symbol-&-1&-GLS		0.362218	0.0738916	29	4		FALSE		GLS	GLS	98.2069		0	29	0	0.706538	FALSE	0	GLS	78556		0.0504704
596918	taxon:9606	2.76667		0	180641	1902	glycine receptor beta	gene	biological_process-&-1&-GO:0051291-&&-protein heterooligomerization-%%-GO:0006811-&&-ion transport-%%-GO:0007399-&&-nervous system development-%%-GO:0007218-&&-neuropeptide signaling pathway-%%-GO:0007628-&&-adult walking behavior-%%-GO:0007268-&&-chemical synaptic transmission-%%-GO:0034220-&&-ion transmembrane transport-%%-GO:0001964-&&-startle response-%%-GO:0060012-&&-synaptic transmission, g…	G:9606:GLRB		FALSE	KEGG-&-1&-hsa04080-&&-Neuroactive ligand-receptor interaction	GLRB	Homo sapiens (Human)-&&-9606	Gene Symbol-&-1&-GLRB		0.361446	0	1	4		FALSE		GLRB	GLRB	2132		0	1	0	0.705556	FALSE	0	GLRB	0		0
596919	taxon:9606	2.71641		1.126e-05	180647	1902	GLI family zinc finger 3	gene	biological_process-&-1&-GO:0033077-&&-T cell differentiation in thymus-%%-GO:0043585-&&-nose morphogenesis-%%-GO:1903010-&&-regulation of bone development-%%-GO:0008285-&&-negative regulation of cell proliferation-%%-GO:0030318-&&-melanocyte differentiation-%%-GO:0021775-&&-smoothened signaling pathway involved in ventral spinal cord interneuron specification-%%-GO:0048593-&&-camera-type eye morp…	G:9606:GLI3		FALSE	KEGG-&-1&-hsa04340-&&-Hedgehog signaling pathway-%%-hsa04024-&&-cAMP signaling pathway-%%-hsa05217-&&-Basal cell carcinoma-%%-hsa05200-&&-Pathways in cancer	GLI3	Homo sapiens (Human)-&&-9606	Gene Symbol-&-1&-GLI3		0.368133	0.157143	21	4		FALSE		GLI3	GLI3	189.143		0	21	0	0.713932	FALSE	0	GLI3	30938		0.0836443
596920	taxon:9606	2.69397		5.116e-05	180645	1902	glyoxalase I	gene	biological_process-&-1&-GO:0006749-&&-glutathione metabolic process-%%-GO:0009438-&&-methylglyoxal metabolic process-%%-GO:0043066-&&-negative regulation of apoptotic process-%%-GO:0006357-&&-regulation of transcription from RNA polymerase II promoter-%%-GO:0006090-&&-pyruvate metabolic process-%%-GO:0005975-&&-carbohydrate metabolic process-%%-GO:0030316-&&-osteoclast differentiation|cellular_co…	G:9606:GLO1		FALSE	KEGG-&-1&-hsa00620-&&-Pyruvate metabolism	GLO1	Homo sapiens (Human)-&&-9606	Gene Symbol-&-1&-GLO1		0.371199	0.145833	35	4		FALSE		GLO1	GLO1	129.091		0	34	0	0.717671	FALSE	1	GLO1	85624		0.0529432
596921	taxon:9606	2.69923		2.695e-05	180650	1902	golgi glycoprotein 1	gene	biological_process-&-1&-GO:0032330-&&-regulation of chondrocyte differentiation-%%-GO:0050900-&&-leukocyte migration-%%-GO:0010955-&&-negative regulation of protein processing-%%-GO:0030512-&&-negative regulation of transforming growth factor beta receptor signaling pathway-%%-GO:0060349-&&-bone morphogenesis|cellular_component-&-1&-GO:0016021-&&-integral component of membrane-%%-GO:0005578-&&-pr…	G:9606:GLG1		FALSE	KEGG-&-1&-hsa04514-&&-Cell adhesion molecules (CAMs)	GLG1	Homo sapiens (Human)-&&-9606	Gene Symbol-&-1&-GLG1		0.370476	0.043956	14	4		FALSE		GLG1	GLG1	272.5		0	14	0	0.716795	FALSE	0	GLG1	42882		0.11063
596922	taxon:9606	2.84962		1.42e-06	180648	1902	GLI family zinc finger 2	gene	biological_process-&-1&-GO:0002076-&&-osteoblast development-%%-GO:0021983-&&-pituitary gland development-%%-GO:0000122-&&-negative regulation of transcription from RNA polymerase II promoter-%%-GO:0060603-&&-mammary gland duct morphogenesis-%%-GO:0007389-&&-pattern specification process-%%-GO:0045893-&&-positive regulation of transcription, DNA-templated-%%-GO:0021965-&&-spinal cord ventral comm…	G:9606:GLI2		FALSE	KEGG-&-1&-hsa04390-&&-Hippo signaling pathway-%%-hsa04340-&&-Hedgehog signaling pathway-%%-hsa05217-&&-Basal cell carcinoma-%%-hsa05200-&&-Pathways in cancer	GLI2	Homo sapiens (Human)-&&-9606	Gene Symbol-&-1&-GLI2		0.350925	0.166667	9	4		FALSE		GLI2	GLI2	214.111		0	9	0	0.691731	FALSE	0	GLI2	5342		0.157156
596923	taxon:9606	2.54385		7.315e-05	180649	1902	GLI family zinc finger 1	gene	biological_process-&-1&-GO:0021696-&&-cerebellar cortex morphogenesis-%%-GO:0001649-&&-osteoblast differentiation-%%-GO:0045893-&&-positive regulation of transcription, DNA-templated-%%-GO:0097421-&&-liver regeneration-%%-GO:0045667-&&-regulation of osteoblast differentiation-%%-GO:0007418-&&-ventral midline development-%%-GO:2000345-&&-regulation of hepatocyte proliferation-%%-GO:0021983-&&-pitu…	G:9606:GLI1		FALSE	KEGG-&-1&-hsa04340-&&-Hedgehog signaling pathway-%%-hsa04024-&&-cAMP signaling pathway-%%-hsa05217-&&-Basal cell carcinoma-%%-hsa05200-&&-Pathways in cancer	GLI1	Homo sapiens (Human)-&&-9606	Gene Symbol-&-1&-GLI1		0.393106	0.07058	54	4		FALSE		GLI1	GLI1	154.963		0	54	0	0.742692	FALSE	0	GLI1	179784		0.0437596
596924	taxon:9606	2.72679		9.52e-06	180654	1902	glutamate-cysteine ligase modifier subunit	gene	biological_process-&-1&-GO:0071333-&&-cellular response to glucose stimulus-%%-GO:0014823-&&-response to activity-%%-GO:0035229-&&-positive regulation of glutamate-cysteine ligase activity-%%-GO:0050880-&&-regulation of blood vessel size-%%-GO:0044344-&&-cellular response to fibroblast growth factor stimulus-%%-GO:0006534-&&-cysteine metabolic process-%%-GO:0035733-&&-hepatic stellate cell activa…	G:9606:GCLM		FALSE	KEGG-&-1&-hsa00480-&&-Glutathione metabolism-%%-hsa00270-&&-Cysteine and methionine metabolism-%%-hsa04216-&&-Ferroptosis-%%-hsa01100-&&-Metabolic pathways	GCLM	Homo sapiens (Human)-&&-9606	Gene Symbol-&-1&-GCLM		0.366731	0.043956	14	4		FALSE		GCLM	GCLM	213.929		0	14	0	0.712201	FALSE	0	GCLM	22516		0.0971897
596925	taxon:9606	2.76667		0	164274	1902	ouquet formation protein 2	gene	biological_process-&-1&-GO:0045141-&&-meiotic telomere clustering-%%-GO:0007129-&&-synapsis-%%-GO:0070197-&&-meiotic attachment of telomere to nuclear envelope|cellular_component-&-1&-GO:0000784-&&-nuclear chromosome, telomeric region-%%-GO:0005637-&&-nuclear inner membrane	G:9606:TERB2		FALSE		TERB2	Homo sapiens (Human)-&&-9606	Gene Symbol-&-1&-TERB2		0.361446	0	1	4		FALSE		TERB2	TERB2	2132		0	1	0	0.705556	FALSE	0	TERB2	0		0
596926	taxon:9606	3.12923		3e-06	180662	1902	glypican 3	gene	biological_process-&-1&-GO:0050680-&&-negative regulation of epithelial cell proliferation-%%-GO:0072180-&&-mesonephric duct morphogenesis-%%-GO:0035116-&&-embryonic hindlimb morphogenesis-%%-GO:0072138-&&-mesenchymal cell proliferation involved in ureteric bud development-%%-GO:0001658-&&-branching involved in ureteric bud morphogenesis-%%-GO:0006027-&&-glycosaminoglycan catabolic process-%%-GO:…	G:9606:GPC3		FALSE	KEGG-&-1&-hsa05205-&&-Proteoglycans in cancer	GPC3	Homo sapiens (Human)-&&-9606	Gene Symbol-&-1&-GPC3		0.319567	0	6	5		FALSE		GPC3	GPC3	35.5		0	6	0	0.645128	FALSE	0	GPC3	2504		0.170792
596927	taxon:9606	2.41718	1083.69	0.00071352	164279	1902	centrosomal protein 128	gene	cellular_component-&-1&-GO:0005814-&&-centriole-%%-GO:0000922-&&-spindle pole	G:9606:CEP128		FALSE		CEP128	Homo sapiens (Human)-&&-9606	Gene Symbol-&-1&-CEP128	0.489803	0.413705	0.0647149	177	4	0.00727324	FALSE	10.6029	CEP128	CEP128	78.4463	14.73	0	177	0	0.763803	FALSE	0	CEP128	1293064	Infinity	0.0178588
596928	taxon:9606	2.75218		7.3e-06	180661	1902	galactosidase beta 1	gene	biological_process-&-1&-GO:0006027-&&-glycosaminoglycan catabolic process-%%-GO:0006687-&&-glycosphingolipid metabolic process-%%-GO:0042340-&&-keratan sulfate catabolic process-%%-GO:0044262-&&-cellular carbohydrate metabolic process-%%-GO:0019388-&&-galactose catabolic process-%%-GO:0043312-&&-neutrophil degranulation|cellular_component-&-1&-GO:0048471-&&-perinuclear region of cytoplasm-%%-GO:1…	G:9606:GLB1		FALSE	KEGG-&-1&-hsa00531-&&-Glycosaminoglycan degradation-%%-hsa00604-&&-Glycosphingolipid biosynthesis - ganglio series-%%-hsa00600-&&-Sphingolipid metabolism-%%-hsa00052-&&-Galactose metabolism-%%-hsa01100-&&-Metabolic pathways-%%-hsa04142-&&-Lysosome-%%-hsa00511-&&-Other glycan degradation	GLB1	Homo sapiens (Human)-&&-9606	Gene Symbol-&-1&-GLB1		0.363348	0.125	16	4		FALSE		GLB1	GLB1	181.688		0	16	0	0.70797	FALSE	0	GLB1	21672		0.0900124
596929	taxon:9606	2.95308		2.164e-05	180667	1902	glycerol kinase	gene	biological_process-&-1&-GO:0046167-&&-glycerol-3-phosphate biosynthetic process-%%-GO:0006071-&&-glycerol metabolic process-%%-GO:0006641-&&-triglyceride metabolic process-%%-GO:0019563-&&-glycerol catabolic process-%%-GO:0016310-&&-phosphorylation-%%-GO:0019432-&&-triglyceride biosynthetic process|cellular_component-&-1&-GO:0005739-&&-mitochondrion-%%-GO:0005829-&&-cytosol-%%-GO:0070062-&&-extra…	G:9606:GK		FALSE	KEGG-&-1&-hsa01100-&&-Metabolic pathways-%%-hsa03320-&&-PPAR signaling pathway-%%-hsa00561-&&-Glycerolipid metabolism	GK	Homo sapiens (Human)-&&-9606	Gene Symbol-&-1&-GK		0.33863	0.0416667	16	4		FALSE		GK	GK	45.1875		0	16	0	0.674487	FALSE	0	GK	22866		0.0711723
596930	taxon:9606	2.9241		1.042e-05	180670	1902	gap junction protein beta 2	gene	biological_process-&-1&-GO:0002931-&&-response to ischemia-%%-GO:0007267-&&-cell-cell signaling-%%-GO:0055085-&&-transmembrane transport-%%-GO:0044752-&&-response to human chorionic gonadotropin-%%-GO:0071377-&&-cellular response to glucagon stimulus-%%-GO:0048839-&&-inner ear development-%%-GO:0030539-&&-male genitalia development-%%-GO:0032496-&&-response to lipopolysaccharide-%%-GO:0034599-&&-…	G:9606:GJB2	GJB2	TRUE		GJB2	Homo sapiens (Human)-&&-9606	Gene Symbol-&-1&-GJB2		0.341985	0.032967	14	4		FALSE		GJB2	GJB2	69		0	14	0	0.679316	FALSE	0	GJB2	13078		0.0844076
596931	taxon:9606	2.61321		4.444e-05	180671	1902	gap junction protein beta 1	gene	biological_process-&-1&-GO:0007267-&&-cell-cell signaling-%%-GO:0051259-&&-protein oligomerization-%%-GO:0055085-&&-transmembrane transport-%%-GO:0015868-&&-purine ribonucleotide transport-%%-GO:0016264-&&-gap junction assembly-%%-GO:0006810-&&-transport-%%-GO:0007399-&&-nervous system development|cellular_component-&-1&-GO:0016021-&&-integral component of membrane-%%-GO:0005922-&&-connexin compl…	G:9606:GJB1		FALSE		GJB1	Homo sapiens (Human)-&&-9606	Gene Symbol-&-1&-GJB1		0.382672	0.181818	11	4		FALSE		GJB1	GJB1	325.545		0	11	0	0.731132	FALSE	0	GJB1	67690		0.10612
596932	taxon:9606	3.66077		0	180674	1902	gap junction protein alpha 4	gene	biological_process-&-1&-GO:0048265-&&-response to pain-%%-GO:0007267-&&-cell-cell signaling-%%-GO:0003158-&&-endothelium development-%%-GO:0006810-&&-transport-%%-GO:0001568-&&-blood vessel development-%%-GO:0007043-&&-cell-cell junction assembly-%%-GO:0006816-&&-calcium ion transport|cellular_component-&-1&-GO:0005921-&&-gap junction-%%-GO:0005922-&&-connexin complex-%%-GO:0005887-&&-integral co…	G:9606:GJA4		FALSE		GJA4	Homo sapiens (Human)-&&-9606	Gene Symbol-&-1&-GJA4		0.273167	1	2	5		FALSE		GJA4	GJA4	25.5		0	2	0	0.556538	FALSE	0	GJA4	0		0.671053
596933	taxon:9606	2.90346		7.83e-06	180675	1902	gap junction protein alpha 3	gene	biological_process-&-1&-GO:0007267-&&-cell-cell signaling-%%-GO:0006810-&&-transport-%%-GO:0007601-&&-visual perception-%%-GO:0055085-&&-transmembrane transport|cellular_component-&-1&-GO:0016021-&&-integral component of membrane-%%-GO:0005922-&&-connexin complex|molecular_function-&-1&-GO:0005243-&&-gap junction channel activity	G:9606:GJA3		FALSE		GJA3	Homo sapiens (Human)-&&-9606	Gene Symbol-&-1&-GJA3		0.344416	0.2	6	4		FALSE		GJA3	GJA3	188.667		0	6	0	0.682756	FALSE	0	GJA3	9748		0.178009
596934	taxon:9606	3.04487		2.33e-06	180673	1902	gap junction protein alpha 5	gene	biological_process-&-1&-GO:0010652-&&-positive regulation of cell communication by chemical coupling-%%-GO:0098905-&&-regulation of bundle of His cell action potential-%%-GO:0055085-&&-transmembrane transport-%%-GO:0098906-&&-regulation of Purkinje myocyte action potential-%%-GO:0003174-&&-mitral valve development-%%-GO:0035050-&&-embryonic heart tube development-%%-GO:0098910-&&-regulation of at…	G:9606:GJA5		FALSE		GJA5	Homo sapiens (Human)-&&-9606	Gene Symbol-&-1&-GJA5		0.328421	0.2	6	4		FALSE		GJA5	GJA5	109.167		0	6	0	0.659188	FALSE	0	GJA5	3268		0.178435
596935	taxon:9606	3.69462		0	164294	1902	ich membrane anchor 1	gene	biological_process-&-1&-GO:0042135-&&-neurotransmitter catabolic process|cellular_component-&-1&-GO:0016021-&&-integral component of membrane-%%-GO:0005886-&&-plasma membrane-%%-GO:0045202-&&-synapse-%%-GO:0030054-&&-cell junction	G:9606:PRIMA1		FALSE		PRIMA1	Homo sapiens (Human)-&&-9606	Gene Symbol-&-1&-PRIMA1		0.270664	0	1	5		FALSE		PRIMA1	PRIMA1	11		0	1	0	0.550897	FALSE	0	PRIMA1	0		0
596936	taxon:9606	3.28179		8.03e-06	180679	1902	gastric inhibitory polypeptide	gene	biological_process-&-1&-GO:0033993-&&-response to lipid-%%-GO:0035640-&&-exploration behavior-%%-GO:0043434-&&-response to peptide hormone-%%-GO:0010447-&&-response to acidic pH-%%-GO:0043950-&&-positive regulation of cAMP-mediated signaling-%%-GO:0014070-&&-response to organic cyclic compound-%%-GO:0050796-&&-regulation of insulin secretion-%%-GO:0007165-&&-signal transduction-%%-GO:0060291-&&-l…	G:9606:GIP		FALSE	KEGG-&-1&-hsa04024-&&-cAMP signaling pathway-%%-hsa04911-&&-Insulin secretion-%%-hsa04080-&&-Neuroactive ligand-receptor interaction	GIP	Homo sapiens (Human)-&&-9606	Gene Symbol-&-1&-GIP		0.304711	0.190476	7	5		FALSE		GIP	GIP	90		0	7	0	0.619701	FALSE	0	GIP	13040		0.281684
596937	taxon:9606	2.73064		9.15e-05	180677	1902	gap junction protein alpha 1	gene	biological_process-&-1&-GO:0007204-&&-positive regulation of cytosolic calcium ion concentration-%%-GO:0006915-&&-apoptotic process-%%-GO:0007507-&&-heart development-%%-GO:2000810-&&-regulation of bicellular tight junction assembly-%%-GO:0015867-&&-ATP transport-%%-GO:0034405-&&-response to fluid shear stress-%%-GO:0006936-&&-muscle contraction-%%-GO:0051259-&&-protein oligomerization-%%-GO:2000…	G:9606:GJA1	GJA1	TRUE	KEGG-&-1&-hsa05412-&&-Arrhythmogenic right ventricular cardiomyopathy (ARVC)-%%-hsa04540-&&-Gap junction	GJA1	Homo sapiens (Human)-&&-9606	Gene Symbol-&-1&-GJA1		0.366214	0.0719697	35	4		FALSE		GJA1	GJA1	108.545		0	34	0	0.71156	FALSE	1	GJA1	141778		0.050775
596938	taxon:9606	3.81333		0	180683	1902	growth hormone releasing hormone	gene	biological_process-&-1&-GO:0007267-&&-cell-cell signaling-%%-GO:0060124-&&-positive regulation of growth hormone secretion-%%-GO:0043568-&&-positive regulation of insulin-like growth factor receptor signaling pathway-%%-GO:0046005-&&-positive regulation of circadian sleep/wake cycle, REM sleep-%%-GO:0040018-&&-positive regulation of multicellular organism growth-%%-GO:0008284-&&-positive regulati…	G:9606:GHRH		FALSE	KEGG-&-1&-hsa04080-&&-Neuroactive ligand-receptor interaction	GHRH	Homo sapiens (Human)-&&-9606	Gene Symbol-&-1&-GHRH		0.262238	1	2	5		FALSE		GHRH	GHRH	26.5		0	2	0	0.531111	FALSE	0	GHRH	0		0.630952
596939	taxon:9606	2.58192	264.568	0.00013101	180686	1902	growth hormone 1	gene	biological_process-&-1&-GO:0046427-&&-positive regulation of JAK-STAT cascade-%%-GO:0014068-&&-positive regulation of phosphatidylinositol 3-kinase signaling-%%-GO:0040018-&&-positive regulation of multicellular organism growth-%%-GO:0050731-&&-positive regulation of peptidyl-tyrosine phosphorylation-%%-GO:0042523-&&-positive regulation of tyrosine phosphorylation of Stat5 protein-%%-GO:0002092-&…	G:9606:GH1		FALSE	KEGG-&-1&-hsa04060-&&-Cytokine-cytokine receptor interaction-%%-hsa04630-&&-JAK-STAT signaling pathway-%%-hsa04080-&&-Neuroactive ligand-receptor interaction-%%-hsa04151-&&-PI3K-Akt signaling pathway	GH1	Homo sapiens (Human)-&&-9606	Gene Symbol-&-1&-GH1	0.470777	0.387308	0.0496271	86	4	0.00877439	FALSE	7.14583	GH1	GH1	111.548	7.35603	0	85	0	0.736346	FALSE	1	GH1	305246	Infinity	0.0346267
596940	taxon:9606	2.6191		6.775e-05	180684	1902	growth hormone receptor	gene	biological_process-&-1&-GO:0006573-&&-valine metabolic process-%%-GO:0042977-&&-activation of JAK2 kinase activity-%%-GO:0006105-&&-succinate metabolic process-%%-GO:0048009-&&-insulin-like growth factor receptor signaling pathway-%%-GO:0006107-&&-oxaloacetate metabolic process-%%-GO:0046449-&&-creatinine metabolic process-%%-GO:0006101-&&-citrate metabolic process-%%-GO:0042523-&&-positive regul…	G:9606:GHR		FALSE	KEGG-&-1&-hsa04060-&&-Cytokine-cytokine receptor interaction-%%-hsa04630-&&-JAK-STAT signaling pathway-%%-hsa04080-&&-Neuroactive ligand-receptor interaction-%%-hsa04151-&&-PI3K-Akt signaling pathway	GHR	Homo sapiens (Human)-&&-9606	Gene Symbol-&-1&-GHR		0.38181	0.133878	52	4		FALSE		GHR	GHR	140.56		0	51	0	0.73015	FALSE	1	GHR	165380		0.0477551
596941	taxon:9606	2.72859		1.269e-05	164307	1902	heterogeneous nuclear ribonucleoprotein A1-like 2	gene	biological_process-&-1&-GO:0051028-&&-mRNA transport-%%-GO:0008380-&&-RNA splicing-%%-GO:0006397-&&-mRNA processing|cellular_component-&-1&-GO:0005737-&&-cytoplasm-%%-GO:0005681-&&-spliceosomal complex|molecular_function-&-1&-GO:0000166-&&-nucleotide binding-%%-GO:0003723-&&-RNA binding	G:9606:HNRNPA1L2		FALSE	KEGG-&-1&-hsa03040-&&-Spliceosome	HNRNPA1L2	Homo sapiens (Human)-&&-9606	Gene Symbol-&-1&-HNRNPA1L2		0.36649	0.269006	19	4		FALSE		HNRNPA1L2	HNRNPA1L2	206.895		0	19	0	0.711902	FALSE	0	HNRNPA1L2	25018		0.0937157
596942	taxon:9606	2.93628		4.53e-06	180689	1902	beta-1,4-galactosyltransferase 1	gene	biological_process-&-1&-GO:0051270-&&-regulation of cellular component movement-%%-GO:0008285-&&-negative regulation of cell proliferation-%%-GO:0018146-&&-keratan sulfate biosynthetic process-%%-GO:0006487-&&-protein N-linked glycosylation-%%-GO:0002064-&&-epithelial cell development-%%-GO:0005989-&&-lactose biosynthetic process-%%-GO:0030879-&&-mammary gland development-%%-GO:0045136-&&-develop…	G:9606:B4GALT1		FALSE	KEGG-&-1&-hsa00510-&&-N-Glycan biosynthesis-%%-hsa00515-&&-Mannose type O-glycan biosynthesis-%%-hsa00052-&&-Galactose metabolism-%%-hsa01100-&&-Metabolic pathways-%%-hsa00601-&&-Glycosphingolipid biosynthesis - lacto and neolacto series-%%-hsa00533-&&-Glycosaminoglycan biosynthesis - keratan sulfate-%%-hsa00514-&&-Other types of O-glycan biosynthesis	B4GALT1	Homo sapiens (Human)-&&-9606	Gene Symbol-&-1&-B4GALT1		0.340567	0.0666667	12	4		FALSE		B4GALT1	B4GALT1	102.5		0	11	0	0.677286	FALSE	1	B4GALT1	7822		0.14198
596943	taxon:9606	2.94615		2.883e-05	180693	1902	gamma-glutamyl carboxylase	gene	biological_process-&-1&-GO:0006464-&&-cellular protein modification process-%%-GO:0017187-&&-peptidyl-glutamic acid carboxylation-%%-GO:0007596-&&-blood coagulation|cellular_component-&-1&-GO:0016021-&&-integral component of membrane-%%-GO:0016020-&&-membrane-%%-GO:0005789-&&-endoplasmic reticulum membrane|molecular_function-&-1&-GO:0008488-&&-gamma-glutamyl carboxylase activity	G:9606:GGCX		FALSE	KEGG-&-1&-hsa00130-&&-Ubiquinone and other terpenoid-quinone biosynthesis-%%-hsa01100-&&-Metabolic pathways	GGCX	Homo sapiens (Human)-&&-9606	Gene Symbol-&-1&-GGCX		0.339426	0.0833333	9	5		FALSE		GGCX	GGCX	114		0	9	0	0.675641	FALSE	0	GGCX	42948		0.121072
596944	taxon:9606	2.76756		5.12e-06	180698	1902	growth factor independent 1 transcriptional repressor	gene	biological_process-&-1&-GO:0032088-&&-negative regulation of NF-kappaB transcription factor activity-%%-GO:0010956-&&-negative regulation of calcidiol 1-monooxygenase activity-%%-GO:0045892-&&-negative regulation of transcription, DNA-templated-%%-GO:0010957-&&-negative regulation of vitamin D biosynthetic process-%%-GO:0070105-&&-positive regulation of interleukin-6-mediated signaling pathway-%%…	G:9606:GFI1		FALSE		GFI1	Homo sapiens (Human)-&&-9606	Gene Symbol-&-1&-GFI1		0.361329	0.258333	16	4		FALSE		GFI1	GFI1	206.375		0	16	0	0.705406	FALSE	0	GFI1	14896		0.106041
596945	taxon:9606	2.84128		1.245e-05	180699	1902	growth factor, augmenter of liver regeneration	gene	biological_process-&-1&-GO:0055114-&&-oxidation-reduction process-%%-GO:0001889-&&-liver development|cellular_component-&-1&-GO:0005739-&&-mitochondrion-%%-GO:0005576-&&-extracellular region-%%-GO:0005829-&&-cytosol-%%-GO:0005758-&&-mitochondrial intermembrane space|molecular_function-&-1&-GO:0015035-&&-protein disulfide oxidoreductase activity-%%-GO:0008083-&&-growth factor activity-%%-GO:001697…	G:9606:GFER		FALSE		GFER	Homo sapiens (Human)-&&-9606	Gene Symbol-&-1&-GFER		0.351954	0.12381	17	4		FALSE		GFER	GFER	122.4		0	16	0	0.69312	FALSE	1	GFER	24944		0.0870661
596946	taxon:9606	2.51872		4.478e-05	180697	1902	glutamine--fructose-6-phosphate transaminase 1	gene	biological_process-&-1&-GO:0006541-&&-glutamine metabolic process-%%-GO:0006002-&&-fructose 6-phosphate metabolic process-%%-GO:0006048-&&-UDP-N-acetylglucosamine biosynthetic process-%%-GO:0006112-&&-energy reserve metabolic process-%%-GO:0032922-&&-circadian regulation of gene expression-%%-GO:0036498-&&-IRE1-mediated unfolded protein response|cellular_component-&-1&-GO:0005829-&&-cytosol-%%-GO…	G:9606:GFPT1		FALSE	KEGG-&-1&-hsa00520-&&-Amino sugar and nucleotide sugar metabolism-%%-hsa00250-&&-Alanine, aspartate and glutamate metabolism-%%-hsa04931-&&-Insulin resistance-%%-hsa01100-&&-Metabolic pathways	GFPT1	Homo sapiens (Human)-&&-9606	Gene Symbol-&-1&-GFPT1		0.397027	0.175758	66	4		FALSE		GFPT1	GFPT1	185.894		0	66	0	0.74688	FALSE	0	GFPT1	165256		0.0497095
596947	taxon:9606	2.35859		0.00018354	180700	1902	glial fibrillary acidic protein	gene	biological_process-&-1&-GO:1904714-&&-regulation of chaperone-mediated autophagy-%%-GO:0007010-&&-cytoskeleton organization-%%-GO:0043254-&&-regulation of protein complex assembly|cellular_component-&-1&-GO:0005764-&&-lysosome-%%-GO:0045111-&&-intermediate filament cytoskeleton-%%-GO:0005829-&&-cytosol-%%-GO:0005737-&&-cytoplasm-%%-GO:0005882-&&-intermediate filament|molecular_function-&-1&-GO:00…	G:9606:GFAP	GFAP	TRUE	KEGG-&-1&-hsa04630-&&-JAK-STAT signaling pathway	GFAP	Homo sapiens (Human)-&&-9606	Gene Symbol-&-1&-GFAP		0.423982	0.0885341	55	4		FALSE		GFAP	GFAP	184.226		0	54	0	0.773568	FALSE	1	GFAP	373158		0.0371162
596948	taxon:9606	2.7991		5.146e-05	180707	1902	growth differentiation factor 9	gene	biological_process-&-1&-GO:0030509-&&-BMP signaling pathway-%%-GO:0001555-&&-oocyte growth-%%-GO:0010862-&&-positive regulation of pathway-restricted SMAD protein phosphorylation-%%-GO:0007292-&&-female gamete generation-%%-GO:0043408-&&-regulation of MAPK cascade-%%-GO:0008284-&&-positive regulation of cell proliferation-%%-GO:0060395-&&-SMAD protein signal transduction-%%-GO:0048468-&&-cell dev…	G:9606:GDF9		FALSE	KEGG-&-1&-hsa04060-&&-Cytokine-cytokine receptor interaction	GDF9	Homo sapiens (Human)-&&-9606	Gene Symbol-&-1&-GDF9		0.357257	0.0397436	40	4		FALSE		GDF9	GDF9	73.425		0	40	0	0.70015	FALSE	0	GDF9	96676		0.0446549
596949	taxon:9606	2.58949		4.781e-05	180704	1902	GDP dissociation inhibitor 2	gene	biological_process-&-1&-GO:0061024-&&-membrane organization-%%-GO:0015031-&&-protein transport-%%-GO:0055114-&&-oxidation-reduction process-%%-GO:0007165-&&-signal transduction-%%-GO:0007264-&&-small GTPase mediated signal transduction-%%-GO:0043547-&&-positive regulation of GTPase activity-%%-GO:0051056-&&-regulation of small GTPase mediated signal transduction-%%-GO:0043312-&&-neutrophil degran…	G:9606:GDI2		FALSE		GDI2	Homo sapiens (Human)-&&-9606	Gene Symbol-&-1&-GDI2		0.386177	0.122222	45	4		FALSE		GDI2	GDI2	171.6		0	45	0	0.735085	FALSE	0	GDI2	127796		0.0536267
596950	taxon:9606	2.79077		9.5e-07	164320	1902	F-box and leucine rich repeat protein 14	gene	biological_process-&-1&-GO:0000209-&&-protein polyubiquitination-%%-GO:0042787-&&-protein ubiquitination involved in ubiquitin-dependent protein catabolic process|cellular_component-&-1&-GO:0005829-&&-cytosol-%%-GO:0005737-&&-cytoplasm|molecular_function-&-1&-GO:0004842-&&-ubiquitin-protein transferase activity-%%-GO:0005515-&&-protein binding	G:9606:FBXL14		FALSE		FBXL14	Homo sapiens (Human)-&&-9606	Gene Symbol-&-1&-FBXL14		0.358324	0.357143	8	4		FALSE		FBXL14	FBXL14	394.875		0	8	0	0.701538	FALSE	0	FBXL14	3796		0.228636
596951	taxon:9606	2.545		0.00010169	180705	1902	GDP dissociation inhibitor 1	gene	biological_process-&-1&-GO:0050771-&&-negative regulation of axonogenesis-%%-GO:0061024-&&-membrane organization-%%-GO:0015031-&&-protein transport-%%-GO:0055114-&&-oxidation-reduction process-%%-GO:0007165-&&-signal transduction-%%-GO:0090315-&&-negative regulation of protein targeting to membrane-%%-GO:0051592-&&-response to calcium ion-%%-GO:0043547-&&-positive regulation of GTPase activity-%%…	G:9606:GDI1		FALSE		GDI1	Homo sapiens (Human)-&&-9606	Gene Symbol-&-1&-GDI1		0.392927	0.0882155	55	4		FALSE		GDI1	GDI1	144.873		0	55	0	0.7425	FALSE	0	GDI1	222390		0.0409245
596952	taxon:9606	2.73731		8.916e-05	180708	1902	myostatin	gene	biological_process-&-1&-GO:0045662-&&-negative regulation of myoblast differentiation-%%-GO:0014850-&&-response to muscle activity-%%-GO:0043408-&&-regulation of MAPK cascade-%%-GO:0014732-&&-skeletal muscle atrophy-%%-GO:0045893-&&-positive regulation of transcription, DNA-templated-%%-GO:0048468-&&-cell development-%%-GO:0043403-&&-skeletal muscle tissue regeneration-%%-GO:0033574-&&-response t…	G:9606:MSTN		FALSE	KEGG-&-1&-hsa04060-&&-Cytokine-cytokine receptor interaction	MSTN	Homo sapiens (Human)-&&-9606	Gene Symbol-&-1&-MSTN		0.365322	0	9	4		FALSE		MSTN	MSTN	329.429		0	8	0	0.710449	FALSE	1	MSTN	76544		0.145387
596953	taxon:9606	2.56577		1.908e-05	180718	1902	biogenesis of lysosomal organelles complex 1 subunit 1	gene	biological_process-&-1&-GO:0032438-&&-melanosome organization-%%-GO:0048490-&&-anterograde synaptic vesicle transport-%%-GO:0008089-&&-anterograde axonal transport-%%-GO:0009060-&&-aerobic respiration-%%-GO:0060155-&&-platelet dense granule organization-%%-GO:0016197-&&-endosomal transport-%%-GO:0018394-&&-peptidyl-lysine acetylation-%%-GO:0032418-&&-lysosome localization-%%-GO:0031175-&&-neuron …	G:9606:BLOC1S1		FALSE		BLOC1S1	Homo sapiens (Human)-&&-9606	Gene Symbol-&-1&-BLOC1S1		0.389747	0.191667	18	4		FALSE		BLOC1S1	BLOC1S1	274.875		0	17	0	0.739038	FALSE	1	BLOC1S1	53920		0.0801436
596954	taxon:9606	2.91462		4.72e-06	180719	1902	glucokinase regulator	gene	biological_process-&-1&-GO:0033132-&&-negative regulation of glucokinase activity-%%-GO:0046415-&&-urate metabolic process-%%-GO:0000060-&&-protein import into nucleus, translocation-%%-GO:0070328-&&-triglyceride homeostasis-%%-GO:1901135-&&-carbohydrate derivative metabolic process-%%-GO:0005975-&&-carbohydrate metabolic process-%%-GO:0010827-&&-regulation of glucose transport-%%-GO:0009750-&&-r…	G:9606:GCKR		FALSE		GCKR	Homo sapiens (Human)-&&-9606	Gene Symbol-&-1&-GCKR		0.343098	0.3	5	4		FALSE		GCKR	GCKR	214.8		0	5	0	0.680897	FALSE	0	GCKR	6124		0.227813
596955	taxon:9606	3.09538		2e-07	164335	1902	WD repeat domain 66	gene		G:9606:WDR66		FALSE		WDR66	Homo sapiens (Human)-&&-9606	Gene Symbol-&-1&-WDR66		0.323062	0	2	5		FALSE		WDR66	WDR66	259		0	2	0	0.650769	FALSE	0	WDR66	784		0.510891
596956	taxon:9606	3.07628		4e-07	180716	1902	nuclear receptor subfamily 6 group A member 1	gene	biological_process-&-1&-GO:0006367-&&-transcription initiation from RNA polymerase II promoter-%%-GO:0000122-&&-negative regulation of transcription from RNA polymerase II promoter-%%-GO:0008283-&&-cell proliferation-%%-GO:0007283-&&-spermatogenesis-%%-GO:0007276-&&-gamete generation-%%-GO:0030518-&&-intracellular steroid hormone receptor signaling pathway-%%-GO:0045944-&&-positive regulation of …	G:9606:NR6A1		FALSE		NR6A1	Homo sapiens (Human)-&&-9606	Gene Symbol-&-1&-NR6A1		0.325068	0.0666667	8	5		FALSE		NR6A1	NR6A1	84.6667		0	7	0	0.653953	FALSE	1	NR6A1	894		0.216495
596957	taxon:9606	2.46205	472.162	0.00023015	180717	1902	lysine acetyltransferase 2A	gene	biological_process-&-1&-GO:0006366-&&-transcription from RNA polymerase II promoter-%%-GO:0043966-&&-histone H3 acetylation-%%-GO:0021537-&&-telencephalon development-%%-GO:0048312-&&-intracellular distribution of mitochondria-%%-GO:0071356-&&-cellular response to tumor necrosis factor-%%-GO:0031667-&&-response to nutrient levels-%%-GO:0031647-&&-regulation of protein stability-%%-GO:0055007-&&-c…	G:9606:KAT2A		FALSE	KEGG-&-1&-hsa05203-&&-Viral carcinogenesis-%%-hsa04330-&&-Notch signaling pathway-%%-hsa04919-&&-Thyroid hormone signaling pathway-%%-hsa05166-&&-Human T-cell leukemia virus 1 infection	KAT2A	Homo sapiens (Human)-&&-9606	Gene Symbol-&-1&-KAT2A	0.495871	0.406165	0.152685	121	4	0.020361	FALSE	22.0128	KAT2A	KAT2A	171.605	23.2703	0	120	0	0.756325	FALSE	1	KAT2A	726476	Infinity	0.0417063
596958	taxon:9606	2.80705		2.855e-05	180722	1902	GTP cyclohydrolase 1	gene	biological_process-&-1&-GO:0051291-&&-protein heterooligomerization-%%-GO:0008217-&&-regulation of blood pressure-%%-GO:0014916-&&-regulation of lung blood pressure-%%-GO:0042311-&&-vasodilation-%%-GO:0006809-&&-nitric oxide biosynthetic process-%%-GO:0010460-&&-positive regulation of heart rate-%%-GO:0050884-&&-neuromuscular process controlling posture-%%-GO:0042559-&&-pteridine-containing compo…	G:9606:GCH1		FALSE	KEGG-&-1&-hsa00790-&&-Folate biosynthesis-%%-hsa01100-&&-Metabolic pathways	GCH1	Homo sapiens (Human)-&&-9606	Gene Symbol-&-1&-GCH1		0.356246	0.0355731	25	4		FALSE		GCH1	GCH1	96		0	24	0	0.698825	FALSE	1	GCH1	45546		0.0605442
596959	taxon:9606	2.96487		3.79e-06	180723	1902	glucagon receptor	gene	biological_process-&-1&-GO:0071377-&&-cellular response to glucagon stimulus-%%-GO:0007189-&&-adenylate cyclase-activating G-protein coupled receptor signaling pathway-%%-GO:0006887-&&-exocytosis-%%-GO:0070873-&&-regulation of glycogen metabolic process-%%-GO:0007166-&&-cell surface receptor signaling pathway-%%-GO:0007584-&&-response to nutrient-%%-GO:0008217-&&-regulation of blood pressure-%%-G…	G:9606:GCGR	GCGR	TRUE	KEGG-&-1&-hsa04922-&&-Glucagon signaling pathway-%%-hsa04080-&&-Neuroactive ligand-receptor interaction	GCGR	Homo sapiens (Human)-&&-9606	Gene Symbol-&-1&-GCGR		0.337283	0.133333	6	4		FALSE		GCGR	GCGR	123.5		0	6	0	0.672521	FALSE	0	GCGR	4596		0.183582
596960	taxon:9606	3.03846		1.91e-06	180720	1902	glucokinase	gene	biological_process-&-1&-GO:0006739-&&-NADP metabolic process-%%-GO:0051156-&&-glucose 6-phosphate metabolic process-%%-GO:0001678-&&-cellular glucose homeostasis-%%-GO:0050796-&&-regulation of insulin secretion-%%-GO:0015758-&&-glucose transport-%%-GO:0010827-&&-regulation of glucose transport-%%-GO:0061621-&&-canonical glycolysis-%%-GO:0045721-&&-negative regulation of gluconeogenesis-%%-GO:0006…	G:9606:GCK		FALSE	KEGG-&-1&-hsa04930-&&-Type II diabetes mellitus-%%-hsa05230-&&-Central carbon metabolism in cancer-%%-hsa04950-&&-Maturity onset diabetes of the young-%%-hsa04922-&&-Glucagon signaling pathway-%%-hsa01200-&&-Carbon metabolism-%%-hsa01100-&&-Metabolic pathways-%%-hsa00052-&&-Galactose metabolism-%%-hsa04911-&&-Insulin secretion-%%-hsa00500-&&-Starch and sucrose metabolism-%%-hsa00010-&&-Glycolysis…	GCK	Homo sapiens (Human)-&&-9606	Gene Symbol-&-1&-GCK		0.329114	0	7	5		FALSE		GCK	GCK	60.1429		0	7	0	0.660256	FALSE	0	GCK	2664		0.15322
596961	taxon:9606	3.01462		8.9e-07	180721	1902	GTP cyclohydrolase I feedback regulator	gene	biological_process-&-1&-GO:0051291-&&-protein heterooligomerization-%%-GO:0006809-&&-nitric oxide biosynthetic process-%%-GO:0043105-&&-negative regulation of GTP cyclohydrolase I activity-%%-GO:0050999-&&-regulation of nitric-oxide synthase activity-%%-GO:0009890-&&-negative regulation of biosynthetic process-%%-GO:0042133-&&-neurotransmitter metabolic process|cellular_component-&-1&-GO:0005829-…	G:9606:GCHFR		FALSE		GCHFR	Homo sapiens (Human)-&&-9606	Gene Symbol-&-1&-GCHFR		0.331717	0	4	4		FALSE		GCHFR	GCHFR	309		0	3	0	0.664231	FALSE	1	GCHFR	798		0.5
596962	taxon:9606	3.02256		8.91e-06	180724	1902	glucagon	gene	biological_process-&-1&-GO:0010737-&&-protein kinase A signaling-%%-GO:0035948-&&-positive regulation of gluconeogenesis by positive regulation of transcription from RNA polymerase II promoter-%%-GO:0070374-&&-positive regulation of ERK1 and ERK2 cascade-%%-GO:0071377-&&-cellular response to glucagon stimulus-%%-GO:0050796-&&-regulation of insulin secretion-%%-GO:0007165-&&-signal transduction-%%…	G:9606:GCG		FALSE	KEGG-&-1&-hsa04714-&&-Thermogenesis-%%-hsa04024-&&-cAMP signaling pathway-%%-hsa04922-&&-Glucagon signaling pathway-%%-hsa04911-&&-Insulin secretion-%%-hsa04080-&&-Neuroactive ligand-receptor interaction	GCG	Homo sapiens (Human)-&&-9606	Gene Symbol-&-1&-GCG		0.330845	0.0714286	10	4		FALSE		GCG	GCG	59.5		0	9	0	0.662906	FALSE	1	GCG	11908		0.133183
596963	taxon:9606	2.73821		1.331e-05	180725	1902	glutaryl-CoA dehydrogenase	gene	biological_process-&-1&-GO:0006554-&&-lysine catabolic process-%%-GO:0046949-&&-fatty-acyl-CoA biosynthetic process-%%-GO:0006568-&&-tryptophan metabolic process-%%-GO:0033539-&&-fatty acid beta-oxidation using acyl-CoA dehydrogenase|cellular_component-&-1&-GO:0005759-&&-mitochondrial matrix-%%-GO:0005739-&&-mitochondrion|molecular_function-&-1&-GO:0004361-&&-glutaryl-CoA dehydrogenase activity-%…	G:9606:GCDH		FALSE	KEGG-&-1&-hsa01100-&&-Metabolic pathways-%%-hsa00310-&&-Lysine degradation-%%-hsa00071-&&-Fatty acid degradation-%%-hsa00380-&&-Tryptophan metabolism	GCDH	Homo sapiens (Human)-&&-9606	Gene Symbol-&-1&-GCDH		0.365203	0.338235	19	4		FALSE		GCDH	GCDH	180.412		0	18	0	0.710299	FALSE	1	GCDH	28636		0.0862108
596964	taxon:9606	2.87051		2.57e-06	180731	1902	guanylate binding protein 1	gene	biological_process-&-1&-GO:1903077-&&-negative regulation of protein localization to plasma membrane-%%-GO:0050848-&&-regulation of calcium-mediated signaling-%%-GO:0051607-&&-defense response to virus-%%-GO:0060333-&&-interferon-gamma-mediated signaling pathway-%%-GO:1900041-&&-negative regulation of interleukin-2 secretion-%%-GO:1900025-&&-negative regulation of substrate adhesion-dependent cel…	G:9606:GBP1		FALSE	KEGG-&-1&-hsa04621-&&-NOD-like receptor signaling pathway	GBP1	Homo sapiens (Human)-&&-9606	Gene Symbol-&-1&-GBP1		0.34837	0.109091	13	4		FALSE		GBP1	GBP1	140.818		0	12	0	0.688248	FALSE	1	GBP1	5400		0.120149
596965	taxon:9606	2.58192		5.013e-05	180735	1902	glucosylceramidase beta	gene	biological_process-&-1&-GO:0016241-&&-regulation of macroautophagy-%%-GO:0071356-&&-cellular response to tumor necrosis factor-%%-GO:0007005-&&-mitochondrion organization-%%-GO:0006680-&&-glucosylceramide catabolic process-%%-GO:0032436-&&-positive regulation of proteasomal ubiquitin-dependent protein catabolic process-%%-GO:1905165-&&-regulation of lysosomal protein catabolic process-%%-GO:00322…	G:9606:GBA		FALSE	KEGG-&-1&-hsa00600-&&-Sphingolipid metabolism-%%-hsa01100-&&-Metabolic pathways-%%-hsa04142-&&-Lysosome-%%-hsa00511-&&-Other glycan degradation	GBA	Homo sapiens (Human)-&&-9606	Gene Symbol-&-1&-GBA		0.387308	0.122995	34	4		FALSE		GBA	GBA	181.265		0	34	0	0.736346	FALSE	0	GBA	96794		0.0554805
596966	taxon:9606	2.54577		4.371e-05	180733	1902	glioblastoma amplified sequence	gene	biological_process-&-1&-GO:0006754-&&-ATP biosynthetic process-%%-GO:0006119-&&-oxidative phosphorylation-%%-GO:2000984-&&-negative regulation of ATP citrate synthase activity|cellular_component-&-1&-GO:0005739-&&-mitochondrion-%%-GO:0005887-&&-integral component of plasma membrane-%%-GO:0016020-&&-membrane|molecular_function-&-1&-GO:0005515-&&-protein binding	G:9606:GBAS		FALSE		GBAS	Homo sapiens (Human)-&&-9606	Gene Symbol-&-1&-GBAS		0.392809	0.127758	42	4		FALSE		GBAS	GBAS	177.881		0	42	0	0.742372	FALSE	0	GBAS	117560		0.0500301
596967	taxon:9606	2.78115		1.895e-05	180738	1902	GATA binding protein 4	gene	biological_process-&-1&-GO:0010507-&&-negative regulation of autophagy-%%-GO:0060575-&&-intestinal epithelial cell differentiation-%%-GO:0071333-&&-cellular response to glucose stimulus-%%-GO:0051891-&&-positive regulation of cardioblast differentiation-%%-GO:0003215-&&-cardiac right ventricle morphogenesis-%%-GO:0001947-&&-heart looping-%%-GO:0006355-&&-regulation of transcription, DNA-templated…	G:9606:GATA4		FALSE	KEGG-&-1&-hsa04022-&&-cGMP-PKG signaling pathway-%%-hsa04218-&&-Cellular senescence-%%-hsa04530-&&-Tight junction-%%-hsa04919-&&-Thyroid hormone signaling pathway	GATA4	Homo sapiens (Human)-&&-9606	Gene Symbol-&-1&-GATA4		0.359563	0.113333	25	4		FALSE		GATA4	GATA4	130.04		0	25	0	0.703141	FALSE	0	GATA4	39136		0.0715639
596968	taxon:9606	2.70295		1.618e-05	180739	1902	GATA binding protein 3	gene	biological_process-&-1&-GO:0045064-&&-T-helper 2 cell differentiation-%%-GO:0006338-&&-chromatin remodeling-%%-GO:0000122-&&-negative regulation of transcription from RNA polymerase II promoter-%%-GO:0010975-&&-regulation of neuron projection development-%%-GO:0051569-&&-regulation of histone H3-K4 methylation-%%-GO:0071442-&&-positive regulation of histone H3-K14 acetylation-%%-GO:0071773-&&-cel…	G:9606:GATA3		FALSE	KEGG-&-1&-hsa04928-&&-Parathyroid hormone synthesis, secretion and action-%%-hsa04658-&&-Th1 and Th2 cell differentiation-%%-hsa05321-&&-Inflammatory bowel disease (IBD)-%%-hsa04659-&&-Th17 cell differentiation	GATA3	Homo sapiens (Human)-&&-9606	Gene Symbol-&-1&-GATA3		0.369966	0.116923	26	4		FALSE		GATA3	GATA3	175.615		0	26	0	0.716175	FALSE	0	GATA3	50410		0.0733258
596969	taxon:9606	2.86013		3.93e-06	180737	1902	GATA binding protein 6	gene	biological_process-&-1&-GO:0060486-&&-Clara cell differentiation-%%-GO:0060575-&&-intestinal epithelial cell differentiation-%%-GO:0030513-&&-positive regulation of BMP signaling pathway-%%-GO:0060430-&&-lung saccule development-%%-GO:0045892-&&-negative regulation of transcription, DNA-templated-%%-GO:0006366-&&-transcription from RNA polymerase II promoter-%%-GO:0060510-&&-Type II pneumocyte di…	G:9606:GATA6		FALSE		GATA6	Homo sapiens (Human)-&&-9606	Gene Symbol-&-1&-GATA6		0.349635	0.0833333	9	4		FALSE		GATA6	GATA6	178.556		0	9	0	0.689979	FALSE	0	GATA6	7502		0.140688
596970	taxon:9606	2.59154		5.914e-05	180740	1902	GATA binding protein 2	gene	biological_process-&-1&-GO:0033993-&&-response to lipid-%%-GO:0060100-&&-positive regulation of phagocytosis, engulfment-%%-GO:0007204-&&-positive regulation of cytosolic calcium ion concentration-%%-GO:0001764-&&-neuron migration-%%-GO:0000122-&&-negative regulation of transcription from RNA polymerase II promoter-%%-GO:0021902-&&-commitment of neuronal cell to specific neuron type in forebrain-…	G:9606:GATA2		FALSE		GATA2	Homo sapiens (Human)-&&-9606	Gene Symbol-&-1&-GATA2		0.385871	0.158361	43	4		FALSE		GATA2	GATA2	185.163		0	43	0	0.734744	FALSE	0	GATA2	192938		0.0581286
596971	taxon:9606	2.5459		0.00010652	180741	1902	GATA binding protein 1	gene	biological_process-&-1&-GO:0008285-&&-negative regulation of cell proliferation-%%-GO:0097028-&&-dendritic cell differentiation-%%-GO:0006366-&&-transcription from RNA polymerase II promoter-%%-GO:0045893-&&-positive regulation of transcription, DNA-templated-%%-GO:0070527-&&-platelet aggregation-%%-GO:0048873-&&-homeostasis of number of cells within a tissue-%%-GO:0048821-&&-erythrocyte developm…	G:9606:GATA1		FALSE		GATA1	Homo sapiens (Human)-&&-9606	Gene Symbol-&-1&-GATA1		0.392789	0.113384	59	4		FALSE		GATA1	GATA1	146.983		0	59	0	0.74235	FALSE	0	GATA1	248686		0.0418012
596972	taxon:9606	2.74282		2.14e-06	164357	1902	chromosome 11 open reading frame 84	gene		G:9606:C11orf84		FALSE		C11orf84	Homo sapiens (Human)-&&-9606	Gene Symbol-&-1&-C11orf84		0.364588	0.467836	19	4		FALSE		C11orf84	C11orf84	336.526		0	19	0	0.70953	FALSE	0	C11orf84	15820		0.160328
596973	taxon:9606	2.46974	530.254	0.00018119	180747	1902	glycyl-tRNA synthetase	gene	biological_process-&-1&-GO:0015966-&&-diadenosine tetraphosphate biosynthetic process-%%-GO:0006418-&&-tRNA aminoacylation for protein translation-%%-GO:0006426-&&-glycyl-tRNA aminoacylation|cellular_component-&-1&-GO:0005829-&&-cytosol-%%-GO:0070062-&&-extracellular exosome-%%-GO:0005759-&&-mitochondrial matrix-%%-GO:0005737-&&-cytoplasm-%%-GO:0030141-&&-secretory granule-%%-GO:0030424-&&-axon|m…	G:9606:GARS		FALSE	KEGG-&-1&-hsa00970-&&-Aminoacyl-tRNA biosynthesis	GARS	Homo sapiens (Human)-&&-9606	Gene Symbol-&-1&-GARS	0.493094	0.4049	0.121006	99	4	0.0138393	FALSE	10.5424	GARS	GARS	149.949	11.0448	0	99	0	0.755043	FALSE	0	GARS	482912	Infinity	0.036935
596974	taxon:9606	2.7241		3.77e-06	180744	1902	growth arrest specific 2	gene	biological_process-&-1&-GO:0006915-&&-apoptotic process-%%-GO:0007050-&&-cell cycle arrest-%%-GO:0008360-&&-regulation of cell shape|cellular_component-&-1&-GO:0005829-&&-cytosol-%%-GO:0016020-&&-membrane-%%-GO:0005884-&&-actin filament|molecular_function-&-1&-GO:0008017-&&-microtubule binding	G:9606:GAS2		FALSE		GAS2	Homo sapiens (Human)-&&-9606	Gene Symbol-&-1&-GAS2		0.367093	0	4	4		FALSE		GAS2	GAS2	606		0	4	0	0.71265	FALSE	0	GAS2	9974		0.259434
596975	taxon:9606	2.45962		6.952e-05	164361	1902	CWF19-like 2, cell cycle control (S. pombe)	gene	molecular_function-&-1&-GO:0003824-&&-catalytic activity	G:9606:CWF19L2		FALSE		CWF19L2	Homo sapiens (Human)-&&-9606	Gene Symbol-&-1&-CWF19L2		0.406568	0.0555556	28	4		FALSE		CWF19L2	CWF19L2	222.286		0	28	0	0.756731	FALSE	0	CWF19L2	139574		0.052524
596976	taxon:9606	2.85077		1.23e-06	164364	1902	piwi like RNA-mediated gene silencing 4	gene	biological_process-&-1&-GO:0034587-&&-piRNA metabolic process-%%-GO:0031047-&&-gene silencing by RNA-%%-GO:0007283-&&-spermatogenesis-%%-GO:0006417-&&-regulation of translation-%%-GO:0043046-&&-DNA methylation involved in gamete generation-%%-GO:0030154-&&-cell differentiation-%%-GO:0051321-&&-meiotic cell cycle-%%-GO:0007275-&&-multicellular organism development-%%-GO:0010529-&&-negative regulat…	G:9606:PIWIL4		FALSE		PIWIL4	Homo sapiens (Human)-&&-9606	Gene Symbol-&-1&-PIWIL4		0.350783	0.305556	9	4		FALSE		PIWIL4	PIWIL4	192.889		0	9	0	0.691538	FALSE	0	PIWIL4	5190		0.150169
596977	taxon:9606	3.40192		0	180749	1902	leucine rich repeat containing 32	gene	biological_process-&-1&-GO:0050710-&&-negative regulation of cytokine secretion-%%-GO:0046007-&&-negative regulation of activated T cell proliferation-%%-GO:0010628-&&-positive regulation of gene expression|cellular_component-&-1&-GO:0005887-&&-integral component of plasma membrane	G:9606:LRRC32		FALSE		LRRC32	Homo sapiens (Human)-&&-9606	Gene Symbol-&-1&-LRRC32		0.293951	0	1	5		FALSE		LRRC32	LRRC32	95		0	1	0	0.599679	FALSE	0	LRRC32	0		0
596978	taxon:9606	2.08013	2281.99	0.00181701	180754	1902	glyceraldehyde-3-phosphate dehydrogenase	gene	biological_process-&-1&-GO:0071346-&&-cellular response to interferon-gamma-%%-GO:0000226-&&-microtubule cytoskeleton organization-%%-GO:0016241-&&-regulation of macroautophagy-%%-GO:0050821-&&-protein stabilization-%%-GO:0017148-&&-negative regulation of translation-%%-GO:0006094-&&-gluconeogenesis-%%-GO:0061621-&&-canonical glycolysis-%%-GO:0035606-&&-peptidyl-cysteine S-trans-nitrosylation-%%-…	G:9606:GAPDH	GAPDH	TRUE	KEGG-&-1&-hsa00010-&&-Glycolysis / Gluconeogenesis-%%-hsa01100-&&-Metabolic pathways-%%-hsa01200-&&-Carbon metabolism-%%-hsa04066-&&-HIF-1 signaling pathway-%%-hsa05010-&&-Alzheimer disease-%%-hsa01230-&&-Biosynthesis of amino acids	GAPDH	Homo sapiens (Human)-&&-9606	Gene Symbol-&-1&-GAPDH	0.527345	0.48074	0.102065	217	4	0.0384677	FALSE	29.831	GAPDH	GAPDH	200.153	40.4315	0	216	0	0.819979	FALSE	1	GAPDH	4169034	Infinity	0.0287488
596979	taxon:9606	2.99269		3.2e-06	180755	1902	growth associated protein 43	gene	biological_process-&-1&-GO:0061564-&&-axon development-%%-GO:0009611-&&-response to wounding-%%-GO:0042246-&&-tissue regeneration-%%-GO:0051489-&&-regulation of filopodium assembly-%%-GO:0016198-&&-axon choice point recognition-%%-GO:0045165-&&-cell fate commitment-%%-GO:0007205-&&-protein kinase C-activating G-protein coupled receptor signaling pathway-%%-GO:0007411-&&-axon guidance-%%-GO:004000…	G:9606:GAP43		FALSE		GAP43	Homo sapiens (Human)-&&-9606	Gene Symbol-&-1&-GAP43		0.334147	0.0555556	9	5		FALSE		GAP43	GAP43	66.3333		0	9	0	0.667885	FALSE	0	GAP43	5340		0.140313
596980	taxon:9606	2.95218		4.6e-07	180757	1902	guanidinoacetate N-methyltransferase	gene	biological_process-&-1&-GO:0046500-&&-S-adenosylmethionine metabolic process-%%-GO:0046498-&&-S-adenosylhomocysteine metabolic process-%%-GO:0006936-&&-muscle contraction-%%-GO:0006600-&&-creatine metabolic process-%%-GO:0009887-&&-animal organ morphogenesis-%%-GO:0007283-&&-spermatogenesis-%%-GO:0006601-&&-creatine biosynthetic process-%%-GO:0040014-&&-regulation of multicellular organism growth…	G:9606:GAMT		FALSE	KEGG-&-1&-hsa00260-&&-Glycine, serine and threonine metabolism-%%-hsa01100-&&-Metabolic pathways-%%-hsa00330-&&-Arginine and proline metabolism	GAMT	Homo sapiens (Human)-&&-9606	Gene Symbol-&-1&-GAMT		0.338733	0.5	5	5		FALSE		GAMT	GAMT	194		0	5	0	0.674637	FALSE	0	GAMT	2086		0.241646
596981	taxon:9606	2.75756		4.31e-06	164378	1902	proteasome subunit alpha 8	gene	biological_process-&-1&-GO:0038095-&&-Fc-epsilon receptor signaling pathway-%%-GO:0055085-&&-transmembrane transport-%%-GO:0016579-&&-protein deubiquitination-%%-GO:0038061-&&-NIK/NF-kappaB signaling-%%-GO:0090263-&&-positive regulation of canonical Wnt signaling pathway-%%-GO:0010972-&&-negative regulation of G2/M transition of mitotic cell cycle-%%-GO:0033209-&&-tumor necrosis factor-mediated s…	G:9606:PSMA8		FALSE	KEGG-&-1&-hsa03050-&&-Proteasome	PSMA8	Homo sapiens (Human)-&&-9606	Gene Symbol-&-1&-PSMA8		0.362639	0.810084	35	4		FALSE		PSMA8	PSMA8	143.371		0	35	0	0.707073	FALSE	0	PSMA8	17490		0.0722274
596982	taxon:9606	2.88795		7.04e-06	180760	1902	polypeptide N-acetylgalactosaminyltransferase 2	gene	biological_process-&-1&-GO:0016266-&&-O-glycan processing-%%-GO:0006493-&&-protein O-linked glycosylation-%%-GO:0018242-&&-protein O-linked glycosylation via serine-%%-GO:0018243-&&-protein O-linked glycosylation via threonine-%%-GO:0002378-&&-immunoglobulin biosynthetic process|cellular_component-&-1&-GO:0000139-&&-Golgi membrane-%%-GO:0048471-&&-perinuclear region of cytoplasm-%%-GO:0070062-&&-…	G:9606:GALNT2		FALSE	KEGG-&-1&-hsa01100-&&-Metabolic pathways-%%-hsa00512-&&-Mucin type O-glycan biosynthesis	GALNT2	Homo sapiens (Human)-&&-9606	Gene Symbol-&-1&-GALNT2		0.346267	0.021978	14	4		FALSE		GALNT2	GALNT2	94.3571		0	14	0	0.685342	FALSE	0	GALNT2	13320		0.0864801
596983	taxon:9606	2.97538		0	164381	1902	CDK2 associated cullin domain 1	gene	biological_process-&-1&-GO:0045860-&&-positive regulation of protein kinase activity-%%-GO:0042787-&&-protein ubiquitination involved in ubiquitin-dependent protein catabolic process-%%-GO:0008284-&&-positive regulation of cell proliferation-%%-GO:0000082-&&-G1/S transition of mitotic cell cycle|cellular_component-&-1&-GO:0031461-&&-cullin-RING ubiquitin ligase complex|molecular_function-&-1&-GO:…	G:9606:CACUL1		FALSE		CACUL1	Homo sapiens (Human)-&&-9606	Gene Symbol-&-1&-CACUL1		0.336091	1	2	5		FALSE		CACUL1	CACUL1	499		0	2	0	0.670769	FALSE	0	CACUL1	0		0.52416
596984	taxon:9606	2.52603		0.00013262	180771	1902	ferritin heavy chain 1	gene	biological_process-&-1&-GO:0043312-&&-neutrophil degranulation-%%-GO:0048147-&&-negative regulation of fibroblast proliferation-%%-GO:0006879-&&-cellular iron ion homeostasis-%%-GO:0055114-&&-oxidation-reduction process-%%-GO:0006880-&&-intracellular sequestering of iron ion-%%-GO:0008285-&&-negative regulation of cell proliferation-%%-GO:0097286-&&-iron ion import-%%-GO:0006955-&&-immune respons…	G:9606:FTH1		FALSE	KEGG-&-1&-hsa04216-&&-Ferroptosis-%%-hsa04978-&&-Mineral absorption-%%-hsa04217-&&-Necroptosis	FTH1	Homo sapiens (Human)-&&-9606	Gene Symbol-&-1&-FTH1		0.395879	0.0580392	53	4		FALSE		FTH1	FTH1	141.549		0	52	0	0.745662	FALSE	1	FTH1	241418		0.0385946
596985	taxon:9606	2.72603		8.12e-06	180774	1902	centromere protein I	gene	biological_process-&-1&-GO:0007548-&&-sex differentiation-%%-GO:0034080-&&-CENP-A containing nucleosome assembly-%%-GO:0007062-&&-sister chromatid cohesion|cellular_component-&-1&-GO:0005829-&&-cytosol-%%-GO:0000776-&&-kinetochore-%%-GO:0016604-&&-nuclear body-%%-GO:0005654-&&-nucleoplasm|molecular_function-&-1&-GO:0005515-&&-protein binding	G:9606:CENPI		FALSE		CENPI	Homo sapiens (Human)-&&-9606	Gene Symbol-&-1&-CENPI		0.366834	0.4	6	4		FALSE		CENPI	CENPI	413.167		0	6	0	0.712329	FALSE	0	CENPI	11064		0.17567
596986	taxon:9606	2.78436		1.331e-05	164390	1902	BRI3 binding protein	gene	cellular_component-&-1&-GO:0016021-&&-integral component of membrane-%%-GO:0005739-&&-mitochondrion-%%-GO:0005741-&&-mitochondrial outer membrane	G:9606:BRI3BP		FALSE		BRI3BP	Homo sapiens (Human)-&&-9606	Gene Symbol-&-1&-BRI3BP		0.359149	0.0181818	11	4		FALSE		BRI3BP	BRI3BP	218.273		0	11	0	0.702607	FALSE	0	BRI3BP	26532		0.12101
596987	taxon:9606	2.83026		1.509e-05	180772	1902	nuclear receptor subfamily 5 group A member 2	gene	biological_process-&-1&-GO:0009790-&&-embryo development-%%-GO:0045893-&&-positive regulation of transcription, DNA-templated-%%-GO:0006355-&&-regulation of transcription, DNA-templated-%%-GO:0061113-&&-pancreas morphogenesis-%%-GO:0043401-&&-steroid hormone mediated signaling pathway-%%-GO:0030522-&&-intracellular receptor signaling pathway-%%-GO:0030855-&&-epithelial cell differentiation-%%-GO:…	G:9606:NR5A2		FALSE	KEGG-&-1&-hsa04950-&&-Maturity onset diabetes of the young	NR5A2	Homo sapiens (Human)-&&-9606	Gene Symbol-&-1&-NR5A2		0.353325	0.09	27	4		FALSE		NR5A2	NR5A2	92.64		0	26	0	0.694957	FALSE	1	NR5A2	28344		0.0650141
596988	taxon:9606	2.79026		8.08e-06	180773	1902	follicle stimulating hormone receptor	gene	biological_process-&-1&-GO:0070374-&&-positive regulation of ERK1 and ERK2 cascade-%%-GO:0010738-&&-regulation of protein kinase A signaling-%%-GO:0007190-&&-activation of adenylate cyclase activity-%%-GO:0007292-&&-female gamete generation-%%-GO:0008585-&&-female gonad development-%%-GO:0009755-&&-hormone-mediated signaling pathway-%%-GO:0008584-&&-male gonad development-%%-GO:0007283-&&-spermat…	G:9606:FSHR		FALSE	KEGG-&-1&-hsa04913-&&-Ovarian steroidogenesis-%%-hsa04024-&&-cAMP signaling pathway-%%-hsa04080-&&-Neuroactive ligand-receptor interaction	FSHR	Homo sapiens (Human)-&&-9606	Gene Symbol-&-1&-FSHR		0.35839	0.0416667	16	4		FALSE		FSHR	FSHR	158.062		0	16	0	0.701624	FALSE	0	FSHR	18286		0.0917321
596989	taxon:9606	2.76667		0	164394	1902	maestro heat like repeat family member 8	gene		G:9606:MROH8		FALSE		MROH8	Homo sapiens (Human)-&&-9606	Gene Symbol-&-1&-MROH8		0.361446	0	1	4		FALSE		MROH8	MROH8	2132		0	1	0	0.705556	FALSE	0	MROH8	0		0
596990	taxon:9606	2.59141		9.609e-05	164399	1902	tripartite motif containing 69	gene	biological_process-&-1&-GO:0006915-&&-apoptotic process-%%-GO:0000209-&&-protein polyubiquitination|cellular_component-&-1&-GO:0005634-&&-nucleus-%%-GO:0005829-&&-cytosol-%%-GO:0005737-&&-cytoplasm-%%-GO:0016607-&&-nuclear speck|molecular_function-&-1&-GO:0008270-&&-zinc ion binding-%%-GO:0004842-&&-ubiquitin-protein transferase activity-%%-GO:0005515-&&-protein binding	G:9606:TRIM69		FALSE		TRIM69	Homo sapiens (Human)-&&-9606	Gene Symbol-&-1&-TRIM69		0.38589	0.0238095	30	4		FALSE		TRIM69	TRIM69	151.536		0	29	0	0.734765	FALSE	1	TRIM69	147160		0.0471357
596991	taxon:9606	2.76756		1.319e-05	164400	1902	CCCTC-binding factor like	gene	biological_process-&-1&-GO:0006366-&&-transcription from RNA polymerase II promoter-%%-GO:0051569-&&-regulation of histone H3-K4 methylation-%%-GO:0045893-&&-positive regulation of transcription, DNA-templated-%%-GO:0045944-&&-positive regulation of transcription from RNA polymerase II promoter-%%-GO:0043046-&&-DNA methylation involved in gamete generation-%%-GO:0010628-&&-positive regulation of …	G:9606:CTCFL		FALSE		CTCFL	Homo sapiens (Human)-&&-9606	Gene Symbol-&-1&-CTCFL		0.361329	0.292308	26	4		FALSE		CTCFL	CTCFL	245.615		0	26	0	0.705406	FALSE	0	CTCFL	49308		0.130004
596992	taxon:9606	2.30744	920.038	0.0005102	180785	1902	mechanistic target of rapamycin	gene	biological_process-&-1&-GO:0001934-&&-positive regulation of protein phosphorylation-%%-GO:1904193-&&-negative regulation of cholangiocyte apoptotic process-%%-GO:0051496-&&-positive regulation of stress fiber assembly-%%-GO:0010831-&&-positive regulation of myotube differentiation-%%-GO:0014736-&&-negative regulation of muscle atrophy-%%-GO:0045792-&&-negative regulation of cell size-%%-GO:00515…	G:9606:MTOR	MTOR	TRUE	KEGG-&-1&-hsa04930-&&-Type II diabetes mellitus-%%-hsa04152-&&-AMPK signaling pathway-%%-hsa01521-&&-EGFR tyrosine kinase inhibitor resistance-%%-hsa05205-&&-Proteoglycans in cancer-%%-hsa04630-&&-JAK-STAT signaling pathway-%%-hsa04150-&&-mTOR signaling pathway-%%-hsa05212-&&-Pancreatic cancer-%%-hsa05165-&&-Human papillomavirus infection-%%-hsa05224-&&-Breast cancer-%%-hsa04919-&&-Thyroid hormon…	MTOR	Homo sapiens (Human)-&&-9606	Gene Symbol-&-1&-MTOR	0.508272	0.433381	0.0859504	123	4	0.0152545	FALSE	13.9189	MTOR	MTOR	152.174	15.64	0	122	0	0.782094	FALSE	1	MTOR	1092956	Infinity	0.0287732
596993	taxon:9606	2.51269		0.00010542	180795	1902	general transcription factor IIIC subunit 1	gene	biological_process-&-1&-GO:0009304-&&-tRNA transcription-%%-GO:0042797-&&-tRNA transcription from RNA polymerase III promoter-%%-GO:0006359-&&-regulation of transcription from RNA polymerase III promoter-%%-GO:0006384-&&-transcription initiation from RNA polymerase III promoter-%%-GO:0042791-&&-5S class rRNA transcription from RNA polymerase III type 1 promoter-%%-GO:0006351-&&-transcription, DNA…	G:9606:GTF3C1		FALSE		GTF3C1	Homo sapiens (Human)-&&-9606	Gene Symbol-&-1&-GTF3C1		0.397979	0.127996	67	4		FALSE		GTF3C1	GTF3C1	181.612		0	67	0	0.747885	FALSE	0	GTF3C1	294124		0.0481325
596994	taxon:9606	2.5259		2.552e-05	180798	1902	BRF1, RNA polymerase III transcription initiation factor subunit	gene	biological_process-&-1&-GO:0045945-&&-positive regulation of transcription from RNA polymerase III promoter-%%-GO:0006384-&&-transcription initiation from RNA polymerase III promoter-%%-GO:0006383-&&-transcription from RNA polymerase III promoter-%%-GO:0009303-&&-rRNA transcription-%%-GO:0009304-&&-tRNA transcription|cellular_component-&-1&-GO:0000126-&&-transcription factor TFIIIB complex-%%-GO:…	G:9606:BRF1		FALSE		BRF1	Homo sapiens (Human)-&&-9606	Gene Symbol-&-1&-BRF1		0.395899	0.141667	16	4		FALSE		BRF1	BRF1	308.5		0	16	0	0.745684	FALSE	0	BRF1	77944		0.082569
596995	taxon:9606	3.1841		6.6e-07	164415	1902	NIMA related kinase 7	gene	biological_process-&-1&-GO:0000910-&&-cytokinesis-%%-GO:0051225-&&-spindle assembly-%%-GO:0051973-&&-positive regulation of telomerase activity-%%-GO:0007346-&&-regulation of mitotic cell cycle-%%-GO:1904355-&&-positive regulation of telomere capping-%%-GO:0032212-&&-positive regulation of telomere maintenance via telomerase-%%-GO:0006468-&&-protein phosphorylation|cellular_component-&-1&-GO:0000…	G:9606:NEK7		FALSE	KEGG-&-1&-hsa04621-&&-NOD-like receptor signaling pathway	NEK7	Homo sapiens (Human)-&&-9606	Gene Symbol-&-1&-NEK7		0.31406	0	3	5		FALSE		NEK7	NEK7	88.3333		0	3	0	0.635983	FALSE	0	NEK7	876		0.335897
596996	taxon:9606	2.94026		6.91e-06	180799	1902	general transcription factor IIIA	gene	biological_process-&-1&-GO:0006383-&&-transcription from RNA polymerase III promoter-%%-GO:0009303-&&-rRNA transcription-%%-GO:0006355-&&-regulation of transcription, DNA-templated|cellular_component-&-1&-GO:0005634-&&-nucleus-%%-GO:0005654-&&-nucleoplasm|molecular_function-&-1&-GO:0003677-&&-DNA binding-%%-GO:0003723-&&-RNA binding-%%-GO:0046872-&&-metal ion binding	G:9606:GTF3A		FALSE		GTF3A	Homo sapiens (Human)-&&-9606	Gene Symbol-&-1&-GTF3A		0.340106	0.0714286	8	4		FALSE		GTF3A	GTF3A	118.5		0	8	0	0.676624	FALSE	0	GTF3A	8536		0.162534
596997	taxon:9606	2.80628		5.86e-06	180802	1902	general transcription factor IIH subunit 4	gene	biological_process-&-1&-GO:0000717-&&-nucleotide-excision repair, DNA duplex unwinding-%%-GO:0006367-&&-transcription initiation from RNA polymerase II promoter-%%-GO:0006362-&&-transcription elongation from RNA polymerase I promoter-%%-GO:0006366-&&-transcription from RNA polymerase II promoter-%%-GO:0006296-&&-nucleotide-excision repair, DNA incision, 5'-to lesion-%%-GO:0033683-&&-nucleotide-ex…	G:9606:GTF2H4		FALSE	KEGG-&-1&-hsa03420-&&-Nucleotide excision repair-%%-hsa05203-&&-Viral carcinogenesis-%%-hsa03022-&&-Basal transcription factors	GTF2H4	Homo sapiens (Human)-&&-9606	Gene Symbol-&-1&-GTF2H4		0.356343	0.464052	18	4		FALSE		GTF2H4	GTF2H4	140.111		0	18	0	0.698953	FALSE	0	GTF2H4	13692		0.0829551
596998	taxon:9606	2.31731	567.253	0.0003566	180801	1902	general transcription factor IIi	gene	biological_process-&-1&-GO:0006367-&&-transcription initiation from RNA polymerase II promoter-%%-GO:0006366-&&-transcription from RNA polymerase II promoter-%%-GO:0006357-&&-regulation of transcription from RNA polymerase II promoter-%%-GO:0007165-&&-signal transduction-%%-GO:0014886-&&-transition between slow and fast fiber-%%-GO:0051481-&&-negative regulation of cytosolic calcium ion concentra…	G:9606:GTF2I		FALSE	KEGG-&-1&-hsa05168-&&-Herpes simplex infection-%%-hsa04022-&&-cGMP-PKG signaling pathway-%%-hsa03022-&&-Basal transcription factors	GTF2I	Homo sapiens (Human)-&&-9606	Gene Symbol-&-1&-GTF2I	0.508468	0.431535	0.106827	115	4	0.0223567	FALSE	18	GTF2I	GTF2I	220.327	18.803	0	114	0	0.780449	FALSE	1	GTF2I	1087844	Infinity	0.0421433
596999	taxon:9606	2.36205		0.00025199	180807	1902	general transcription factor IIF subunit 2	gene	biological_process-&-1&-GO:0006367-&&-transcription initiation from RNA polymerase II promoter-%%-GO:0042795-&&-snRNA transcription from RNA polymerase II promoter-%%-GO:0006366-&&-transcription from RNA polymerase II promoter-%%-GO:0006370-&&-7-methylguanosine mRNA capping-%%-GO:0032968-&&-positive regulation of transcription elongation from RNA polymerase II promoter-%%-GO:0010467-&&-gene expre…	G:9606:GTF2F2		FALSE	KEGG-&-1&-hsa03022-&&-Basal transcription factors	GTF2F2	Homo sapiens (Human)-&&-9606	Gene Symbol-&-1&-GTF2F2		0.423361	0.119513	64	4		FALSE		GTF2F2	GTF2F2	161.177		0	63	0	0.772991	FALSE	1	GTF2F2	427628		0.0325645
597000	taxon:9606	2.93603		2.04e-06	180804	1902	general transcription factor IIH subunit 2	gene	biological_process-&-1&-GO:0000717-&&-nucleotide-excision repair, DNA duplex unwinding-%%-GO:0006362-&&-transcription elongation from RNA polymerase I promoter-%%-GO:0006366-&&-transcription from RNA polymerase II promoter-%%-GO:0006296-&&-nucleotide-excision repair, DNA incision, 5'-to lesion-%%-GO:0006293-&&-nucleotide-excision repair, preincision complex stabilization-%%-GO:0006289-&&-nucleoti…	G:9606:GTF2H2		FALSE	KEGG-&-1&-hsa03420-&&-Nucleotide excision repair-%%-hsa05203-&&-Viral carcinogenesis-%%-hsa03022-&&-Basal transcription factors	GTF2H2	Homo sapiens (Human)-&&-9606	Gene Symbol-&-1&-GTF2H2		0.340596	0.395604	14	5		FALSE		GTF2H2	GTF2H2	78.9286		0	14	0	0.677329	FALSE	0	GTF2H2	4526		0.10062
597001	taxon:9606	2.55449		9.247e-05	180805	1902	general transcription factor IIH subunit 1	gene	biological_process-&-1&-GO:0000717-&&-nucleotide-excision repair, DNA duplex unwinding-%%-GO:0006367-&&-transcription initiation from RNA polymerase II promoter-%%-GO:0006362-&&-transcription elongation from RNA polymerase I promoter-%%-GO:0006366-&&-transcription from RNA polymerase II promoter-%%-GO:0006296-&&-nucleotide-excision repair, DNA incision, 5'-to lesion-%%-GO:0033683-&&-nucleotide-ex…	G:9606:GTF2H1		FALSE	KEGG-&-1&-hsa03420-&&-Nucleotide excision repair-%%-hsa05203-&&-Viral carcinogenesis-%%-hsa03022-&&-Basal transcription factors	GTF2H1	Homo sapiens (Human)-&&-9606	Gene Symbol-&-1&-GTF2H1		0.391468	0.149388	52	4		FALSE		GTF2H1	GTF2H1	159.8		0	51	0	0.740919	FALSE	1	GTF2H1	206828		0.0461579
597002	taxon:9606	2.59731		2.184e-05	164421	1902	transcription elongation factor A like 2	gene	biological_process-&-1&-GO:0006355-&&-regulation of transcription, DNA-templated-%%-GO:0006351-&&-transcription, DNA-templated|cellular_component-&-1&-GO:0005634-&&-nucleus	G:9606:TCEAL2		FALSE		TCEAL2	Homo sapiens (Human)-&&-9606	Gene Symbol-&-1&-TCEAL2		0.385014	0.120879	14	4		FALSE		TCEAL2	TCEAL2	291		0	14	0	0.733782	FALSE	0	TCEAL2	51678		0.0905088
597003	taxon:9606	2.5059		0.00011859	180810	1902	general transcription factor IIE subunit 1	gene	biological_process-&-1&-GO:0006367-&&-transcription initiation from RNA polymerase II promoter-%%-GO:0042795-&&-snRNA transcription from RNA polymerase II promoter-%%-GO:0006366-&&-transcription from RNA polymerase II promoter-%%-GO:0006355-&&-regulation of transcription, DNA-templated-%%-GO:0006368-&&-transcription elongation from RNA polymerase II promoter-%%-GO:0016032-&&-viral process|cellula…	G:9606:GTF2E1		FALSE	KEGG-&-1&-hsa05203-&&-Viral carcinogenesis-%%-hsa03022-&&-Basal transcription factors	GTF2E1	Homo sapiens (Human)-&&-9606	Gene Symbol-&-1&-GTF2E1		0.399059	0.151691	46	4		FALSE		GTF2E1	GTF2E1	140.391		0	46	0	0.749017	FALSE	0	GTF2E1	198742		0.0364729
597004	taxon:9606	2.59154		7.737e-05	164427	1902	ring finger protein 32	gene	cellular_component-&-1&-GO:0016235-&&-aggresome-%%-GO:0005768-&&-endosome|molecular_function-&-1&-GO:0008270-&&-zinc ion binding-%%-GO:0005515-&&-protein binding	G:9606:RNF32		FALSE		RNF32	Homo sapiens (Human)-&&-9606	Gene Symbol-&-1&-RNF32		0.385871	0.209104	40	4		FALSE		RNF32	RNF32	114.579		0	39	0	0.734744	FALSE	1	RNF32	107086		0.0357671
597005	taxon:9606	2.55128	261.903	0.00019884	180811	1902	general transcription factor IIB	gene	biological_process-&-1&-GO:0006367-&&-transcription initiation from RNA polymerase II promoter-%%-GO:0050434-&&-positive regulation of viral transcription-%%-GO:0042795-&&-snRNA transcription from RNA polymerase II promoter-%%-GO:0006366-&&-transcription from RNA polymerase II promoter-%%-GO:0006355-&&-regulation of transcription, DNA-templated-%%-GO:0006368-&&-transcription elongation from RNA p…	G:9606:GTF2B		FALSE	KEGG-&-1&-hsa05203-&&-Viral carcinogenesis-%%-hsa03022-&&-Basal transcription factors	GTF2B	Homo sapiens (Human)-&&-9606	Gene Symbol-&-1&-GTF2B	0.473307	0.39196	0.107314	79	4	0.00755831	FALSE	10.25	GTF2B	GTF2B	120.558	10.6154	0	78	0	0.741453	FALSE	1	GTF2B	366146	Infinity	0.0347143
597006	taxon:9606	2.445	254.753	0.00015897	180808	1902	general transcription factor IIF subunit 1	gene	biological_process-&-1&-GO:0006367-&&-transcription initiation from RNA polymerase II promoter-%%-GO:0042795-&&-snRNA transcription from RNA polymerase II promoter-%%-GO:0006366-&&-transcription from RNA polymerase II promoter-%%-GO:0009615-&&-response to virus-%%-GO:0006368-&&-transcription elongation from RNA polymerase II promoter-%%-GO:0032968-&&-positive regulation of transcription elongatio…	G:9606:GTF2F1		FALSE	KEGG-&-1&-hsa03022-&&-Basal transcription factors	GTF2F1	Homo sapiens (Human)-&&-9606	Gene Symbol-&-1&-GTF2F1	0.490167	0.408998	0.111977	79	4	0.00842606	FALSE	7.87805	GTF2F1	GTF2F1	148.418	8.21472	0	79	0	0.759167	FALSE	0	GTF2F1	401750	Infinity	0.0345018
597007	taxon:9606	2.62115		8.092e-05	164424	1902	S100 calcium binding protein A16	gene	biological_process-&-1&-GO:0051592-&&-response to calcium ion|cellular_component-&-1&-GO:0005886-&&-plasma membrane-%%-GO:0070062-&&-extracellular exosome-%%-GO:0005829-&&-cytosol-%%-GO:0005730-&&-nucleolus|molecular_function-&-1&-GO:0003723-&&-RNA binding-%%-GO:0005515-&&-protein binding-%%-GO:0005509-&&-calcium ion binding-%%-GO:0042803-&&-protein homodimerization activity	G:9606:S100A16		FALSE		S100A16	Homo sapiens (Human)-&&-9606	Gene Symbol-&-1&-S100A16		0.381511	0.06	25	4		FALSE		S100A16	S100A16	149.88		0	25	0	0.729808	FALSE	0	S100A16	94176		0.0499366
597008	taxon:9606	2.45962		4.974e-05	180809	1902	general transcription factor IIE subunit 2	gene	biological_process-&-1&-GO:0006367-&&-transcription initiation from RNA polymerase II promoter-%%-GO:0042795-&&-snRNA transcription from RNA polymerase II promoter-%%-GO:0006366-&&-transcription from RNA polymerase II promoter-%%-GO:0006355-&&-regulation of transcription, DNA-templated-%%-GO:0006368-&&-transcription elongation from RNA polymerase II promoter|cellular_component-&-1&-GO:0005634-&&-…	G:9606:GTF2E2		FALSE	KEGG-&-1&-hsa05203-&&-Viral carcinogenesis-%%-hsa03022-&&-Basal transcription factors	GTF2E2	Homo sapiens (Human)-&&-9606	Gene Symbol-&-1&-GTF2E2		0.406568	0.161345	37	4		FALSE		GTF2E2	GTF2E2	194.971		0	36	0	0.756731	FALSE	1	GTF2E2	121214		0.0460464
597009	taxon:9606	2.44872	474.616	0.00010343	180814	1902	mutS homolog 6	gene	biological_process-&-1&-GO:0043570-&&-maintenance of DNA repeat elements-%%-GO:0006298-&&-mismatch repair-%%-GO:0045190-&&-isotype switching-%%-GO:0000710-&&-meiotic mismatch repair-%%-GO:0016446-&&-somatic hypermutation of immunoglobulin genes-%%-GO:0045910-&&-negative regulation of DNA recombination-%%-GO:0008630-&&-intrinsic apoptotic signaling pathway in response to DNA damage-%%-GO:0016447-&…	G:9606:MSH6		FALSE	KEGG-&-1&-hsa03430-&&-Mismatch repair-%%-hsa01524-&&-Platinum drug resistance-%%-hsa05200-&&-Pathways in cancer-%%-hsa05210-&&-Colorectal cancer	MSH6	Homo sapiens (Human)-&&-9606	Gene Symbol-&-1&-MSH6	0.493647	0.408377	0.148457	81	4	0.0125466	FALSE	13.339	MSH6	MSH6	178.42	13.9544	0	81	0	0.758547	FALSE	0	MSH6	337662	Infinity	0.0418993
597010	taxon:9606	2.81577		3.66e-06	180815	1902	glutathione S-transferase zeta 1	gene	biological_process-&-1&-GO:0006572-&&-tyrosine catabolic process-%%-GO:0006749-&&-glutathione metabolic process-%%-GO:0006559-&&-L-phenylalanine catabolic process-%%-GO:0098869-&&-cellular oxidant detoxification-%%-GO:1901687-&&-glutathione derivative biosynthetic process|cellular_component-&-1&-GO:0005829-&&-cytosol-%%-GO:0005739-&&-mitochondrion|molecular_function-&-1&-GO:0004364-&&-glutathione…	G:9606:GSTZ1		FALSE	KEGG-&-1&-hsa00350-&&-Tyrosine metabolism-%%-hsa01100-&&-Metabolic pathways	GSTZ1	Homo sapiens (Human)-&&-9606	Gene Symbol-&-1&-GSTZ1		0.355143	0.25	11	4		FALSE		GSTZ1	GSTZ1	263.333		0	10	0	0.697372	FALSE	1	GSTZ1	11170		0.168445
597011	taxon:9606	2.69333		2.65e-06	164431	1902	myosin light chain 6B	gene	biological_process-&-1&-GO:0007519-&&-skeletal muscle tissue development-%%-GO:0030049-&&-muscle filament sliding-%%-GO:0006936-&&-muscle contraction|cellular_component-&-1&-GO:0005859-&&-muscle myosin complex-%%-GO:0005829-&&-cytosol-%%-GO:0070062-&&-extracellular exosome-%%-GO:0016459-&&-myosin complex-%%-GO:0016461-&&-unconventional myosin complex|molecular_function-&-1&-GO:0003774-&&-motor ac…	G:9606:MYL6B		FALSE	KEGG-&-1&-hsa04270-&&-Vascular smooth muscle contraction-%%-hsa04530-&&-Tight junction-%%-hsa04921-&&-Oxytocin signaling pathway	MYL6B	Homo sapiens (Human)-&&-9606	Gene Symbol-&-1&-MYL6B		0.371287	0.25731	19	4		FALSE		MYL6B	MYL6B	269.895		0	19	0	0.717778	FALSE	0	MYL6B	19680		0.109692
597012	taxon:9606	2.90474		1.27e-06	164428	1902	myosin IIIB	gene	biological_process-&-1&-GO:0007601-&&-visual perception-%%-GO:0006468-&&-protein phosphorylation-%%-GO:0050896-&&-response to stimulus|cellular_component-&-1&-GO:0005737-&&-cytoplasm-%%-GO:0016459-&&-myosin complex|molecular_function-&-1&-GO:0003779-&&-actin binding-%%-GO:0004674-&&-protein serine/threonine kinase activity-%%-GO:0005524-&&-ATP binding-%%-GO:0003774-&&-motor activity	G:9606:MYO3B		FALSE		MYO3B	Homo sapiens (Human)-&&-9606	Gene Symbol-&-1&-MYO3B		0.344264	0.333333	3	4		FALSE		MYO3B	MYO3B	506.333		0	3	0	0.682543	FALSE	0	MYO3B	1850		0.527083
597013	taxon:9606	2.94936		6.6e-07	180812	1902	general transcription factor IIA subunit 2	gene	biological_process-&-1&-GO:0006367-&&-transcription initiation from RNA polymerase II promoter-%%-GO:0042795-&&-snRNA transcription from RNA polymerase II promoter-%%-GO:0006366-&&-transcription from RNA polymerase II promoter-%%-GO:0045944-&&-positive regulation of transcription from RNA polymerase II promoter-%%-GO:0051123-&&-RNA polymerase II transcriptional preinitiation complex assembly-%%-G…	G:9606:GTF2A2		FALSE	KEGG-&-1&-hsa05203-&&-Viral carcinogenesis-%%-hsa03022-&&-Basal transcription factors	GTF2A2	Homo sapiens (Human)-&&-9606	Gene Symbol-&-1&-GTF2A2		0.339057	0.416667	11	5		FALSE		GTF2A2	GTF2A2	122.111		0	10	0	0.675107	FALSE	1	GTF2A2	2380		0.150754
597014	taxon:9606	2.6941		5.868e-05	180813	1902	general transcription factor IIA subunit 1	gene	biological_process-&-1&-GO:0006367-&&-transcription initiation from RNA polymerase II promoter-%%-GO:0042795-&&-snRNA transcription from RNA polymerase II promoter-%%-GO:0006366-&&-transcription from RNA polymerase II promoter-%%-GO:0006355-&&-regulation of transcription, DNA-templated-%%-GO:0006368-&&-transcription elongation from RNA polymerase II promoter|cellular_component-&-1&-GO:0005829-&&-…	G:9606:GTF2A1		FALSE	KEGG-&-1&-hsa05203-&&-Viral carcinogenesis-%%-hsa03022-&&-Basal transcription factors	GTF2A1	Homo sapiens (Human)-&&-9606	Gene Symbol-&-1&-GTF2A1		0.371181	0.0842199	50	4		FALSE		GTF2A1	GTF2A1	94.0625		0	49	0	0.71765	FALSE	1	GTF2A1	122542		0.0389782
597015	taxon:9606	2.46897		0.00068606	180819	1902	glutathione S-transferase pi 1	gene	biological_process-&-1&-GO:0035726-&&-common myeloid progenitor cell proliferation-%%-GO:0006805-&&-xenobiotic metabolic process-%%-GO:0032872-&&-regulation of stress-activated MAPK cascade-%%-GO:0071672-&&-negative regulation of smooth muscle cell chemotaxis-%%-GO:0031100-&&-animal organ regeneration-%%-GO:0043651-&&-linoleic acid metabolic process-%%-GO:0032691-&&-negative regulation of interle…	G:9606:GSTP1	GSTP1	TRUE	KEGG-&-1&-hsa00982-&&-Drug metabolism - cytochrome P450-%%-hsa00480-&&-Glutathione metabolism-%%-hsa00983-&&-Drug metabolism - other enzymes-%%-hsa05204-&&-Chemical carcinogenesis-%%-hsa05418-&&-Fluid shear stress and atherosclerosis-%%-hsa05215-&&-Prostate cancer-%%-hsa01524-&&-Platinum drug resistance-%%-hsa05225-&&-Hepatocellular carcinoma-%%-hsa00980-&&-Metabolism of xenobiotics by cytochrome…	GSTP1	Homo sapiens (Human)-&&-9606	Gene Symbol-&-1&-GSTP1		0.405026	0.0882353	54	4		FALSE		GSTP1	GSTP1	242.962		0	53	0	0.755171	FALSE	1	GSTP1	1503556		0.0589103
597016	taxon:9606	3.46885		0	180816	1902	glutathione S-transferase theta 2 (gene/pseudogene)	gene	cellular_component-&-1&-GO:0005737-&&-cytoplasm-%%-GO:0070062-&&-extracellular exosome|molecular_function-&-1&-GO:0004364-&&-glutathione transferase activity	G:9606:GSTT2		FALSE	KEGG-&-1&-hsa00982-&&-Drug metabolism - cytochrome P450-%%-hsa00480-&&-Glutathione metabolism-%%-hsa00983-&&-Drug metabolism - other enzymes-%%-hsa05204-&&-Chemical carcinogenesis-%%-hsa05418-&&-Fluid shear stress and atherosclerosis-%%-hsa01524-&&-Platinum drug resistance-%%-hsa05225-&&-Hepatocellular carcinoma-%%-hsa00980-&&-Metabolism of xenobiotics by cytochrome P450-%%-hsa05200-&&-Pathways i…	GSTT2	Homo sapiens (Human)-&&-9606	Gene Symbol-&-1&-GSTT2		0.28828	0	1	5		FALSE		GSTT2	GSTT2	52		0	1	0	0.588526	FALSE	0	GSTT2	0		0
597017	taxon:9606	2.89987		6.81e-06	180817	1902	glutathione S-transferase theta 1	gene	biological_process-&-1&-GO:0006749-&&-glutathione metabolic process-%%-GO:0098869-&&-cellular oxidant detoxification-%%-GO:1901687-&&-glutathione derivative biosynthetic process|cellular_component-&-1&-GO:0005829-&&-cytosol-%%-GO:0070062-&&-extracellular exosome|molecular_function-&-1&-GO:0004364-&&-glutathione transferase activity-%%-GO:0004602-&&-glutathione peroxidase activity-%%-GO:0005515-&&…	G:9606:GSTT1		FALSE	KEGG-&-1&-hsa00982-&&-Drug metabolism - cytochrome P450-%%-hsa00480-&&-Glutathione metabolism-%%-hsa00983-&&-Drug metabolism - other enzymes-%%-hsa05204-&&-Chemical carcinogenesis-%%-hsa05418-&&-Fluid shear stress and atherosclerosis-%%-hsa01524-&&-Platinum drug resistance-%%-hsa05225-&&-Hepatocellular carcinoma-%%-hsa00980-&&-Metabolism of xenobiotics by cytochrome P450-%%-hsa05200-&&-Pathways i…	GSTT1	Homo sapiens (Human)-&&-9606	Gene Symbol-&-1&-GSTT1		0.344843	0.0666667	8	4		FALSE		GSTT1	GSTT1	188.5		0	7	0	0.683355	FALSE	1	GSTT1	9736		0.177034
597018	taxon:9606	2.72526		2.304e-05	164433	1902	ankyrin repeat and SOCS box containing 9	gene	biological_process-&-1&-GO:0035556-&&-intracellular signal transduction-%%-GO:0016567-&&-protein ubiquitination-%%-GO:0045732-&&-positive regulation of protein catabolic process|cellular_component-&-1&-GO:0005739-&&-mitochondrion|molecular_function-&-1&-GO:0005515-&&-protein binding	G:9606:ASB9		FALSE		ASB9	Homo sapiens (Human)-&&-9606	Gene Symbol-&-1&-ASB9		0.366938	0.0758557	47	4		FALSE		ASB9	ASB9	152.66		0	47	0	0.712457	FALSE	0	ASB9	91418		0.0703591
597019	taxon:9606	2.78744		1.314e-05	180822	1902	glutathione S-transferase mu 3	gene	biological_process-&-1&-GO:0042178-&&-xenobiotic catabolic process-%%-GO:0043627-&&-response to estrogen-%%-GO:0006749-&&-glutathione metabolic process-%%-GO:0008065-&&-establishment of blood-nerve barrier-%%-GO:0018916-&&-nitrobenzene metabolic process-%%-GO:0070458-&&-cellular detoxification of nitrogen compound-%%-GO:1901687-&&-glutathione derivative biosynthetic process|cellular_component-&-1…	G:9606:GSTM3		FALSE	KEGG-&-1&-hsa00982-&&-Drug metabolism - cytochrome P450-%%-hsa00480-&&-Glutathione metabolism-%%-hsa00983-&&-Drug metabolism - other enzymes-%%-hsa05204-&&-Chemical carcinogenesis-%%-hsa05418-&&-Fluid shear stress and atherosclerosis-%%-hsa01524-&&-Platinum drug resistance-%%-hsa05225-&&-Hepatocellular carcinoma-%%-hsa00980-&&-Metabolism of xenobiotics by cytochrome P450-%%-hsa05200-&&-Pathways i…	GSTM3	Homo sapiens (Human)-&&-9606	Gene Symbol-&-1&-GSTM3		0.358753	0.0416667	18	4		FALSE		GSTM3	GSTM3	150.5		0	17	0	0.702094	FALSE	1	GSTM3	31200		0.0856164
597020	taxon:9606	2.49603		0.00010421	164436	1902	ankyrin repeat and SOCS box containing 6	gene	biological_process-&-1&-GO:0035556-&&-intracellular signal transduction-%%-GO:0016567-&&-protein ubiquitination|cellular_component-&-1&-GO:0005737-&&-cytoplasm|molecular_function-&-1&-GO:0005515-&&-protein binding	G:9606:ASB6		FALSE		ASB6	Homo sapiens (Human)-&&-9606	Gene Symbol-&-1&-ASB6		0.400637	0.15873	28	4		FALSE		ASB6	ASB6	237.714		0	28	0	0.750662	FALSE	0	ASB6	187638		0.0603189
597021	taxon:9606	2.87487		5.55e-06	180821	1902	glutathione S-transferase mu 4	gene	biological_process-&-1&-GO:0042178-&&-xenobiotic catabolic process-%%-GO:0006749-&&-glutathione metabolic process-%%-GO:1901687-&&-glutathione derivative biosynthetic process|cellular_component-&-1&-GO:0005829-&&-cytosol-%%-GO:0005737-&&-cytoplasm|molecular_function-&-1&-GO:0004364-&&-glutathione transferase activity-%%-GO:0019899-&&-enzyme binding-%%-GO:0005515-&&-protein binding-%%-GO:0042803-&…	G:9606:GSTM4		FALSE	KEGG-&-1&-hsa00480-&&-Glutathione metabolism-%%-hsa00982-&&-Drug metabolism - cytochrome P450-%%-hsa00983-&&-Drug metabolism - other enzymes-%%-hsa05204-&&-Chemical carcinogenesis-%%-hsa05418-&&-Fluid shear stress and atherosclerosis-%%-hsa01524-&&-Platinum drug resistance-%%-hsa05225-&&-Hepatocellular carcinoma-%%-hsa00980-&&-Metabolism of xenobiotics by cytochrome P450-%%-hsa05200-&&-Pathways i…	GSTM4	Homo sapiens (Human)-&&-9606	Gene Symbol-&-1&-GSTM4		0.347842	0.0454546	14	5		FALSE		GSTM4	GSTM4	168.083		0	13	0	0.687521	FALSE	1	GSTM4	15670		0.111425
597022	taxon:9606	2.72397		3.2e-07	180827	1902	glutathione S-transferase alpha 3	gene	biological_process-&-1&-GO:1901687-&&-glutathione derivative biosynthetic process-%%-GO:0006749-&&-glutathione metabolic process|cellular_component-&-1&-GO:0005829-&&-cytosol-%%-GO:0070062-&&-extracellular exosome|molecular_function-&-1&-GO:0004364-&&-glutathione transferase activity	G:9606:GSTA3		FALSE	KEGG-&-1&-hsa00480-&&-Glutathione metabolism-%%-hsa00982-&&-Drug metabolism - cytochrome P450-%%-hsa00983-&&-Drug metabolism - other enzymes-%%-hsa05204-&&-Chemical carcinogenesis-%%-hsa05418-&&-Fluid shear stress and atherosclerosis-%%-hsa01524-&&-Platinum drug resistance-%%-hsa05225-&&-Hepatocellular carcinoma-%%-hsa00980-&&-Metabolism of xenobiotics by cytochrome P450-%%-hsa05200-&&-Pathways i…	GSTA3	Homo sapiens (Human)-&&-9606	Gene Symbol-&-1&-GSTA3		0.367111	0.666667	5	4		FALSE		GSTA3	GSTA3	822.333		0	4	0	0.712671	FALSE	1	GSTA3	4590		0.348151
597023	taxon:9606	2.68756		1.481e-05	164443	1902	t-complex 10-like	gene	biological_process-&-1&-GO:0000122-&&-negative regulation of transcription from RNA polymerase II promoter-%%-GO:0006351-&&-transcription, DNA-templated|cellular_component-&-1&-GO:0005634-&&-nucleus|molecular_function-&-1&-GO:0001106-&&-RNA polymerase II transcription corepressor activity-%%-GO:0070491-&&-repressing transcription factor binding-%%-GO:0043621-&&-protein self-association-%%-GO:0005…	G:9606:TCP10L		FALSE		TCP10L	Homo sapiens (Human)-&&-9606	Gene Symbol-&-1&-TCP10L		0.372084	0	9	4		FALSE		TCP10L	TCP10L	405.714		0	8	0	0.718739	FALSE	1	TCP10L	21736		0.158339
597024	taxon:9606	2.80833		7.53e-06	180830	1902	glutathione synthetase	gene	biological_process-&-1&-GO:0007399-&&-nervous system development-%%-GO:0006979-&&-response to oxidative stress-%%-GO:0046686-&&-response to cadmium ion-%%-GO:0043200-&&-response to amino acid-%%-GO:0006520-&&-cellular amino acid metabolic process-%%-GO:0009410-&&-response to xenobiotic stimulus-%%-GO:0006750-&&-glutathione biosynthetic process-%%-GO:0031667-&&-response to nutrient levels-%%-GO:00…	G:9606:GSS		FALSE	KEGG-&-1&-hsa00480-&&-Glutathione metabolism-%%-hsa00270-&&-Cysteine and methionine metabolism-%%-hsa04216-&&-Ferroptosis-%%-hsa01100-&&-Metabolic pathways	GSS	Homo sapiens (Human)-&&-9606	Gene Symbol-&-1&-GSS		0.356083	0.252964	25	4		FALSE		GSS	GSS	122.957		0	24	0	0.698611	FALSE	1	GSS	17390		0.0773251
597025	taxon:9606	2.67359		1.321e-05	180831	1902	glutathione-disulfide reductase	gene	biological_process-&-1&-GO:0006749-&&-glutathione metabolic process-%%-GO:0055114-&&-oxidation-reduction process-%%-GO:0015949-&&-nucleobase-containing small molecule interconversion-%%-GO:0098869-&&-cellular oxidant detoxification-%%-GO:0000302-&&-response to reactive oxygen species-%%-GO:0045454-&&-cell redox homeostasis|cellular_component-&-1&-GO:0005829-&&-cytosol-%%-GO:0070062-&&-extracellul…	G:9606:GSR		FALSE	KEGG-&-1&-hsa00480-&&-Glutathione metabolism-%%-hsa04918-&&-Thyroid hormone synthesis	GSR	Homo sapiens (Human)-&&-9606	Gene Symbol-&-1&-GSR		0.374029	0.237154	25	4		FALSE		GSR	GSR	186.391		0	24	0	0.721068	FALSE	1	GSR	39742		0.0713157
597026	taxon:9606	2.66679		3.031e-05	180829	1902	glutathione S-transferase alpha 1	gene	biological_process-&-1&-GO:0006749-&&-glutathione metabolic process-%%-GO:0008152-&&-metabolic process-%%-GO:0098869-&&-cellular oxidant detoxification-%%-GO:1901687-&&-glutathione derivative biosynthetic process-%%-GO:0030855-&&-epithelial cell differentiation-%%-GO:0043651-&&-linoleic acid metabolic process|cellular_component-&-1&-GO:0005829-&&-cytosol-%%-GO:0070062-&&-extracellular exosome|mol…	G:9606:GSTA1	GSTA1	TRUE	KEGG-&-1&-hsa00982-&&-Drug metabolism - cytochrome P450-%%-hsa00480-&&-Glutathione metabolism-%%-hsa00983-&&-Drug metabolism - other enzymes-%%-hsa05204-&&-Chemical carcinogenesis-%%-hsa05418-&&-Fluid shear stress and atherosclerosis-%%-hsa01524-&&-Platinum drug resistance-%%-hsa05225-&&-Hepatocellular carcinoma-%%-hsa00980-&&-Metabolism of xenobiotics by cytochrome P450-%%-hsa05200-&&-Pathways i…	GSTA1	Homo sapiens (Human)-&&-9606	Gene Symbol-&-1&-GSTA1		0.374982	0.107143	10	4		FALSE		GSTA1	GSTA1	378		0	9	0	0.722201	FALSE	1	GSTA1	25484		0.138889
597027	taxon:9606	2.10603	2682.43	0.00324348	180835	1902	glycogen synthase kinase 3 beta	gene	biological_process-&-1&-GO:0006349-&&-regulation of gene expression by genetic imprinting-%%-GO:0035556-&&-intracellular signal transduction-%%-GO:0021766-&&-hippocampus development-%%-GO:0045444-&&-fat cell differentiation-%%-GO:0045732-&&-positive regulation of protein catabolic process-%%-GO:0032007-&&-negative regulation of TOR signaling-%%-GO:0070059-&&-intrinsic apoptotic signaling pathway …	G:9606:GSK3B	GSK3B	TRUE	KEGG-&-1&-hsa04916-&&-Melanogenesis-%%-hsa04310-&&-Wnt signaling pathway-%%-hsa04062-&&-Chemokine signaling pathway-%%-hsa05162-&&-Measles-%%-hsa04510-&&-Focal adhesion-%%-hsa01521-&&-EGFR tyrosine kinase inhibitor resistance-%%-hsa04150-&&-mTOR signaling pathway-%%-hsa05165-&&-Human papillomavirus infection-%%-hsa05224-&&-Breast cancer-%%-hsa04151-&&-PI3K-Akt signaling pathway-%%-hsa04919-&&-Thy…	GSK3B	Homo sapiens (Human)-&&-9606	Gene Symbol-&-1&-GSK3B	0.521105	0.474828	0.0422686	269	4	0.0226868	FALSE	17.7177	GSK3B	GSK3B	115.498	25.2044	0	268	0	0.815662	FALSE	1	GSK3B	5435216	Infinity	0.0172247
597028	taxon:9606	2.28128		0.00015988	180833	1902	gelsolin	gene	biological_process-&-1&-GO:0051014-&&-actin filament severing-%%-GO:0030041-&&-actin filament polymerization-%%-GO:1903906-&&-regulation of plasma membrane raft polarization-%%-GO:0042246-&&-tissue regeneration-%%-GO:1903923-&&-positive regulation of protein processing in phagocytic vesicle-%%-GO:1990000-&&-amyloid fibril formation-%%-GO:0071276-&&-cellular response to cadmium ion-%%-GO:0051593-&…	G:9606:GSN		FALSE	KEGG-&-1&-hsa04666-&&-Fc gamma R-mediated phagocytosis-%%-hsa05203-&&-Viral carcinogenesis-%%-hsa04810-&&-Regulation of actin cytoskeleton	GSN	Homo sapiens (Human)-&&-9606	Gene Symbol-&-1&-GSN		0.43835	0.179799	62	4		FALSE		GSN	GSN	240.823		0	62	0	0.786453	FALSE	0	GSN	443892		0.0433408
597029	taxon:9606	2.57423		0.00010422	180836	1902	glycogen synthase kinase 3 alpha	gene	biological_process-&-1&-GO:0005977-&&-glycogen metabolic process-%%-GO:0003073-&&-regulation of systemic arterial blood pressure-%%-GO:1903146-&&-regulation of mitophagy-%%-GO:1901030-&&-positive regulation of mitochondrial outer membrane permeabilization involved in apoptotic signaling pathway-%%-GO:2000466-&&-negative regulation of glycogen (starch) synthase activity-%%-GO:0036498-&&-IRE1-media…	G:9606:GSK3A		FALSE	KEGG-&-1&-hsa04062-&&-Chemokine signaling pathway-%%-hsa04728-&&-Dopaminergic synapse-%%-hsa04932-&&-Non-alcoholic fatty liver disease (NAFLD)	GSK3A	Homo sapiens (Human)-&&-9606	Gene Symbol-&-1&-GSK3A		0.388466	0.0754717	56	4		FALSE		GSK3A	GSK3A	128.963		0	55	0	0.737628	FALSE	1	GSK3A	211336		0.0390117
597030	taxon:9606	2.89397		1.803e-05	180843	1902	C-X-C motif chemokine ligand 2	gene	biological_process-&-1&-GO:0006954-&&-inflammatory response-%%-GO:0032496-&&-response to lipopolysaccharide-%%-GO:0006935-&&-chemotaxis-%%-GO:0007186-&&-G-protein coupled receptor signaling pathway-%%-GO:0060326-&&-cell chemotaxis-%%-GO:0090023-&&-positive regulation of neutrophil chemotaxis-%%-GO:0006955-&&-immune response-%%-GO:0002237-&&-response to molecule of bacterial origin-%%-GO:0070098-&…	G:9606:CXCL2	CXCL2	TRUE	KEGG-&-1&-hsa05132-&&-Salmonella infection-%%-hsa04657-&&-IL-17 signaling pathway-%%-hsa04062-&&-Chemokine signaling pathway-%%-hsa04060-&&-Cytokine-cytokine receptor interaction-%%-hsa04668-&&-TNF signaling pathway-%%-hsa05167-&&-Kaposi sarcoma-associated herpesvirus infection-%%-hsa04621-&&-NOD-like receptor signaling pathway-%%-hsa04064-&&-NF-kappa B signaling pathway-%%-hsa05134-&&-Legionello…	CXCL2	Homo sapiens (Human)-&&-9606	Gene Symbol-&-1&-CXCL2		0.345546	0.0357143	10	4		FALSE		CXCL2	CXCL2	134.625		0	9	0	0.684338	FALSE	1	CXCL2	27042		0.132812
597031	taxon:9606	2.23564	714.001	0.00086011	180840	1902	protein disulfide isomerase family A member 3	gene	biological_process-&-1&-GO:2001238-&&-positive regulation of extrinsic apoptotic signaling pathway-%%-GO:0006457-&&-protein folding-%%-GO:0034976-&&-response to endoplasmic reticulum stress-%%-GO:0006621-&&-protein retention in ER lumen-%%-GO:0055114-&&-oxidation-reduction process-%%-GO:0007165-&&-signal transduction-%%-GO:0006508-&&-proteolysis-%%-GO:0006606-&&-protein import into nucleus-%%-GO:…	G:9606:PDIA3		FALSE	KEGG-&-1&-hsa04612-&&-Antigen processing and presentation-%%-hsa05163-&&-Human cytomegalovirus infection-%%-hsa05170-&&-Human immunodeficiency virus 1 infection-%%-hsa04141-&&-Protein processing in endoplasmic reticulum-%%-hsa05169-&&-Epstein-Barr virus infection	PDIA3	Homo sapiens (Human)-&&-9606	Gene Symbol-&-1&-PDIA3	0.50613	0.447299	0.0931023	109	4	0.0151016	FALSE	12.7619	PDIA3	PDIA3	174.807	13.8299	0	109	0	0.79406	FALSE	0	PDIA3	1421090	Infinity	0.0298498
597032	taxon:9606	3.78		2.8e-07	180841	1902	gastrin releasing peptide	gene	biological_process-&-1&-GO:0007165-&&-signal transduction-%%-GO:0007218-&&-neuropeptide signaling pathway|cellular_component-&-1&-GO:0005576-&&-extracellular region-%%-GO:0005615-&&-extracellular space|molecular_function-&-1&-GO:0005184-&&-neuropeptide hormone activity-%%-GO:0005102-&&-receptor binding	G:9606:GRP		FALSE	KEGG-&-1&-hsa04080-&&-Neuroactive ligand-receptor interaction	GRP	Homo sapiens (Human)-&&-9606	Gene Symbol-&-1&-GRP		0.26455	0.333333	3	5		FALSE		GRP	GRP	18.6667		0	3	0	0.536667	FALSE	0	GRP	384		0.416667
597033	taxon:9606	2.84974		3.71e-06	164463	1902	GRB2 associated binding protein 3	gene	biological_process-&-1&-GO:0030225-&&-macrophage differentiation	G:9606:GAB3		FALSE		GAB3	Homo sapiens (Human)-&&-9606	Gene Symbol-&-1&-GAB3		0.350909	0.444444	9	4		FALSE		GAB3	GAB3	271.333		0	9	0	0.691709	FALSE	0	GAB3	10738		0.2096
597034	taxon:9606	2.87321		5.471e-05	180844	1902	C-X-C motif chemokine ligand 1	gene	biological_process-&-1&-GO:0008285-&&-negative regulation of cell proliferation-%%-GO:0032496-&&-response to lipopolysaccharide-%%-GO:0035556-&&-intracellular signal transduction-%%-GO:0060326-&&-cell chemotaxis-%%-GO:0090023-&&-positive regulation of neutrophil chemotaxis-%%-GO:0070098-&&-chemokine-mediated signaling pathway-%%-GO:0007165-&&-signal transduction-%%-GO:0007399-&&-nervous system de…	G:9606:CXCL1	CXCL1	TRUE	KEGG-&-1&-hsa05120-&&-Epithelial cell signaling in Helicobacter pylori infection-%%-hsa05132-&&-Salmonella infection-%%-hsa04657-&&-IL-17 signaling pathway-%%-hsa04062-&&-Chemokine signaling pathway-%%-hsa04060-&&-Cytokine-cytokine receptor interaction-%%-hsa05323-&&-Rheumatoid arthritis-%%-hsa05167-&&-Kaposi sarcoma-associated herpesvirus infection-%%-hsa04668-&&-TNF signaling pathway-%%-hsa0462…	CXCL1	Homo sapiens (Human)-&&-9606	Gene Symbol-&-1&-CXCL1		0.348043	0.0555556	11	4		FALSE		CXCL1	CXCL1	147.111		0	10	0	0.687799	FALSE	1	CXCL1	97086		0.126341
597035	taxon:9606	2.83462		2.366e-05	164465	1902	forkhead box R2	gene	biological_process-&-1&-GO:0006357-&&-regulation of transcription from RNA polymerase II promoter-%%-GO:0006351-&&-transcription, DNA-templated|cellular_component-&-1&-GO:0005634-&&-nucleus|molecular_function-&-1&-GO:0000981-&&-RNA polymerase II transcription factor activity, sequence-specific DNA binding-%%-GO:0005515-&&-protein binding-%%-GO:0043565-&&-sequence-specific DNA binding	G:9606:FOXR2		FALSE		FOXR2	Homo sapiens (Human)-&&-9606	Gene Symbol-&-1&-FOXR2		0.352782	0.248768	29	4		FALSE		FOXR2	FOXR2	78.8966		0	29	0	0.694231	FALSE	0	FOXR2	36624		0.055391
597036	taxon:9606	2.6759		4.82e-06	180854	1902	Rho GTPase activating protein 35	gene	biological_process-&-1&-GO:0007413-&&-axonal fasciculation-%%-GO:0045892-&&-negative regulation of transcription, DNA-templated-%%-GO:0008360-&&-regulation of cell shape-%%-GO:0030879-&&-mammary gland development-%%-GO:0007264-&&-small GTPase mediated signal transduction-%%-GO:0032956-&&-regulation of actin cytoskeleton organization-%%-GO:0010976-&&-positive regulation of neuron projection develo…	G:9606:ARHGAP35	ARHGAP35	TRUE	KEGG-&-1&-hsa04611-&&-Platelet activation-%%-hsa04670-&&-Leukocyte transendothelial migration-%%-hsa04510-&&-Focal adhesion-%%-hsa04810-&&-Regulation of actin cytoskeleton	ARHGAP35	Homo sapiens (Human)-&&-9606	Gene Symbol-&-1&-ARHGAP35		0.373706	0.163636	11	4		FALSE		ARHGAP35	ARHGAP35	323.455		0	11	0	0.720684	FALSE	0	ARHGAP35	13792		0.125
597037	taxon:9606	2.23205	2200	0.00170837	180855	1902	nuclear receptor subfamily 3 group C member 1	gene	biological_process-&-1&-GO:0006366-&&-transcription from RNA polymerase II promoter-%%-GO:0006915-&&-apoptotic process-%%-GO:0051301-&&-cell division-%%-GO:0007165-&&-signal transduction-%%-GO:0006355-&&-regulation of transcription, DNA-templated-%%-GO:0043402-&&-glucocorticoid mediated signaling pathway-%%-GO:0071383-&&-cellular response to steroid hormone stimulus-%%-GO:0016569-&&-covalent chro…	G:9606:NR3C1	NR3C1	TRUE	KEGG-&-1&-hsa04080-&&-Neuroactive ligand-receptor interaction	NR3C1	Homo sapiens (Human)-&&-9606	Gene Symbol-&-1&-NR3C1	0.519261	0.448018	0.0633104	214	4	0.0215353	FALSE	19.8824	NR3C1	NR3C1	122.528	27.9557	0	213	0	0.794658	FALSE	1	NR3C1	3309976	Infinity	0.0212003
597038	taxon:9606	2.73936		5.481e-05	180859	1902	glutamate ionotropic receptor NMDA type subunit 2B	gene	biological_process-&-1&-GO:0007268-&&-chemical synaptic transmission-%%-GO:0007611-&&-learning or memory-%%-GO:0007215-&&-glutamate receptor signaling pathway-%%-GO:0034765-&&-regulation of ion transmembrane transport-%%-GO:0006810-&&-transport-%%-GO:0048013-&&-ephrin receptor signaling pathway-%%-GO:0000165-&&-MAPK cascade-%%-GO:0034220-&&-ion transmembrane transport-%%-GO:0043547-&&-positive re…	G:9606:GRIN2B		FALSE	KEGG-&-1&-hsa04024-&&-cAMP signaling pathway-%%-hsa05014-&&-Amyotrophic lateral sclerosis (ALS)-%%-hsa04724-&&-Glutamatergic synapse-%%-hsa05322-&&-Systemic lupus erythematosus-%%-hsa04728-&&-Dopaminergic synapse-%%-hsa04014-&&-Ras signaling pathway-%%-hsa04080-&&-Neuroactive ligand-receptor interaction-%%-hsa04713-&&-Circadian entrainment-%%-hsa05016-&&-Huntington disease-%%-hsa05031-&&-Amphetam…	GRIN2B	Homo sapiens (Human)-&&-9606	Gene Symbol-&-1&-GRIN2B		0.365049	0.0974359	42	4		FALSE		GRIN2B	GRIN2B	95.525		0	41	0	0.710107	FALSE	1	GRIN2B	102176		0.0469719
597039	taxon:9606	2.69679		3.281e-05	180857	1902	glutamate ionotropic receptor NMDA type subunit 2D	gene	biological_process-&-1&-GO:0060079-&&-excitatory postsynaptic potential-%%-GO:0034765-&&-regulation of ion transmembrane transport-%%-GO:0000165-&&-MAPK cascade-%%-GO:0034220-&&-ion transmembrane transport-%%-GO:0043547-&&-positive regulation of GTPase activity-%%-GO:0035235-&&-ionotropic glutamate receptor signaling pathway-%%-GO:0051930-&&-regulation of sensory perception of pain-%%-GO:0008344-…	G:9606:GRIN2D		FALSE	KEGG-&-1&-hsa05031-&&-Amphetamine addiction-%%-hsa04024-&&-cAMP signaling pathway-%%-hsa05034-&&-Alcoholism-%%-hsa05014-&&-Amyotrophic lateral sclerosis (ALS)-%%-hsa04020-&&-Calcium signaling pathway-%%-hsa04724-&&-Glutamatergic synapse-%%-hsa04720-&&-Long-term potentiation-%%-hsa05010-&&-Alzheimer disease-%%-hsa05033-&&-Nicotine addiction-%%-hsa04080-&&-Neuroactive ligand-receptor interaction-%%…	GRIN2D	Homo sapiens (Human)-&&-9606	Gene Symbol-&-1&-GRIN2D		0.370811	0.111828	31	4		FALSE		GRIN2D	GRIN2D	136.226		0	31	0	0.717201	FALSE	0	GRIN2D	71512		0.0567102
597040	taxon:9606	2.78128		2.185e-05	180860	1902	glutamate ionotropic receptor NMDA type subunit 2A	gene	biological_process-&-1&-GO:0030431-&&-sleep-%%-GO:0060291-&&-long-term synaptic potentiation-%%-GO:0022008-&&-neurogenesis-%%-GO:0033058-&&-directional locomotion-%%-GO:0001964-&&-startle response-%%-GO:0001975-&&-response to amphetamine-%%-GO:0007613-&&-memory-%%-GO:0045471-&&-response to ethanol-%%-GO:0042177-&&-negative regulation of protein catabolic process-%%-GO:0008542-&&-visual learning-%…	G:9606:GRIN2A		FALSE	KEGG-&-1&-hsa04024-&&-cAMP signaling pathway-%%-hsa05014-&&-Amyotrophic lateral sclerosis (ALS)-%%-hsa04724-&&-Glutamatergic synapse-%%-hsa04728-&&-Dopaminergic synapse-%%-hsa05322-&&-Systemic lupus erythematosus-%%-hsa04014-&&-Ras signaling pathway-%%-hsa04080-&&-Neuroactive ligand-receptor interaction-%%-hsa04713-&&-Circadian entrainment-%%-hsa05031-&&-Amphetamine addiction-%%-hsa05034-&&-Alcoh…	GRIN2A	Homo sapiens (Human)-&&-9606	Gene Symbol-&-1&-GRIN2A		0.359546	0.169231	28	4		FALSE		GRIN2A	GRIN2A	113.077		0	27	0	0.70312	FALSE	1	GRIN2A	43308		0.0642923
597041	taxon:9606	2.66808		7.975e-05	180861	1902	glutamate ionotropic receptor NMDA type subunit 1	gene	biological_process-&-1&-GO:0042391-&&-regulation of membrane potential-%%-GO:0018964-&&-propylene metabolic process-%%-GO:0001661-&&-conditioned taste aversion-%%-GO:0007616-&&-long-term memory-%%-GO:0043524-&&-negative regulation of neuron apoptotic process-%%-GO:0021987-&&-cerebral cortex development-%%-GO:0051963-&&-regulation of synapse assembly-%%-GO:0008344-&&-adult locomotory behavior-%%-G…	G:9606:GRIN1		FALSE	KEGG-&-1&-hsa05014-&&-Amyotrophic lateral sclerosis (ALS)-%%-hsa04024-&&-cAMP signaling pathway-%%-hsa04724-&&-Glutamatergic synapse-%%-hsa04014-&&-Ras signaling pathway-%%-hsa04080-&&-Neuroactive ligand-receptor interaction-%%-hsa04713-&&-Circadian entrainment-%%-hsa05016-&&-Huntington disease-%%-hsa05031-&&-Amphetamine addiction-%%-hsa05034-&&-Alcoholism-%%-hsa04015-&&-Rap1 signaling pathway-%%…	GRIN1	Homo sapiens (Human)-&&-9606	Gene Symbol-&-1&-GRIN1		0.374802	0.0888889	48	4		FALSE		GRIN1	GRIN1	101.674		0	47	0	0.721987	FALSE	1	GRIN1	142480		0.0395042
597042	taxon:9606	2.48167		0.00021153	180867	1902	granulin precursor	gene	biological_process-&-1&-GO:0007165-&&-signal transduction-%%-GO:0043312-&&-neutrophil degranulation|cellular_component-&-1&-GO:0005576-&&-extracellular region-%%-GO:0005615-&&-extracellular space-%%-GO:0070062-&&-extracellular exosome-%%-GO:0005783-&&-endoplasmic reticulum-%%-GO:0005764-&&-lysosome-%%-GO:0035578-&&-azurophil granule lumen-%%-GO:0005768-&&-endosome|molecular_function-&-1&-GO:00037…	G:9606:GRN		FALSE		GRN	Homo sapiens (Human)-&&-9606	Gene Symbol-&-1&-GRN		0.402955	0.0417508	55	4		FALSE		GRN	GRN	177.2		0	55	0	0.753056	FALSE	0	GRN	406210		0.044265
597043	taxon:9606	2.89513		3.75e-06	180870	1902	glutamate ionotropic receptor AMPA type subunit 4	gene	biological_process-&-1&-GO:0007215-&&-glutamate receptor signaling pathway-%%-GO:0060079-&&-excitatory postsynaptic potential-%%-GO:0006810-&&-transport-%%-GO:0034220-&&-ion transmembrane transport-%%-GO:0035235-&&-ionotropic glutamate receptor signaling pathway|cellular_component-&-1&-GO:1903561-&&-extracellular vesicle-%%-GO:0005886-&&-plasma membrane-%%-GO:0030054-&&-cell junction-%%-GO:003042…	G:9606:GRIA4		FALSE	KEGG-&-1&-hsa05031-&&-Amphetamine addiction-%%-hsa04723-&&-Retrograde endocannabinoid signaling-%%-hsa04024-&&-cAMP signaling pathway-%%-hsa04724-&&-Glutamatergic synapse-%%-hsa04728-&&-Dopaminergic synapse-%%-hsa05033-&&-Nicotine addiction-%%-hsa04080-&&-Neuroactive ligand-receptor interaction-%%-hsa04713-&&-Circadian entrainment	GRIA4	Homo sapiens (Human)-&&-9606	Gene Symbol-&-1&-GRIA4		0.345408	0.217949	15	4		FALSE		GRIA4	GRIA4	103.538		0	14	0	0.684145	FALSE	1	GRIA4	9592		0.104163
597044	taxon:9606	2.8959		2.77e-06	180871	1902	glutamate ionotropic receptor AMPA type subunit 3	gene	biological_process-&-1&-GO:0007215-&&-glutamate receptor signaling pathway-%%-GO:0060079-&&-excitatory postsynaptic potential-%%-GO:0006810-&&-transport-%%-GO:0034220-&&-ion transmembrane transport-%%-GO:0035235-&&-ionotropic glutamate receptor signaling pathway|cellular_component-&-1&-GO:0005886-&&-plasma membrane-%%-GO:0030054-&&-cell junction-%%-GO:0032281-&&-AMPA glutamate receptor complex-%%…	G:9606:GRIA3		FALSE	KEGG-&-1&-hsa05202-&&-Transcriptional misregulation in cancer-%%-hsa05031-&&-Amphetamine addiction-%%-hsa04024-&&-cAMP signaling pathway-%%-hsa04723-&&-Retrograde endocannabinoid signaling-%%-hsa04724-&&-Glutamatergic synapse-%%-hsa04728-&&-Dopaminergic synapse-%%-hsa05033-&&-Nicotine addiction-%%-hsa04730-&&-Long-term depression-%%-hsa04080-&&-Neuroactive ligand-receptor interaction-%%-hsa04713-…	GRIA3	Homo sapiens (Human)-&&-9606	Gene Symbol-&-1&-GRIA3		0.345316	0.0666667	10	4		FALSE		GRIA3	GRIA3	114		0	10	0	0.684017	FALSE	0	GRIA3	6464		0.115918
597045	taxon:9606	2.70679		9.18e-06	180874	1902	Rap guanine nucleotide exchange factor 1	gene	biological_process-&-1&-GO:0070374-&&-positive regulation of ERK1 and ERK2 cascade-%%-GO:0038180-&&-nerve growth factor signaling pathway-%%-GO:0000186-&&-activation of MAPKK activity-%%-GO:0071320-&&-cellular response to cAMP-%%-GO:0007169-&&-transmembrane receptor protein tyrosine kinase signaling pathway-%%-GO:0032486-&&-Rap protein signal transduction-%%-GO:0001568-&&-blood vessel development…	G:9606:RAPGEF1		FALSE	KEGG-&-1&-hsa04910-&&-Insulin signaling pathway-%%-hsa05211-&&-Renal cell carcinoma-%%-hsa04015-&&-Rap1 signaling pathway-%%-hsa04510-&&-Focal adhesion-%%-hsa04722-&&-Neurotrophin signaling pathway	RAPGEF1	Homo sapiens (Human)-&&-9606	Gene Symbol-&-1&-RAPGEF1		0.369441	0.405263	20	4		FALSE		RAPGEF1	RAPGEF1	238.8		0	20	0	0.715534	FALSE	0	RAPGEF1	26966		0.103066
597046	taxon:9606	2.72615		1.357e-05	180875	1902	growth factor receptor bound protein 14	gene	biological_process-&-1&-GO:0050900-&&-leukocyte migration-%%-GO:0007165-&&-signal transduction-%%-GO:0009967-&&-positive regulation of signal transduction|cellular_component-&-1&-GO:0005886-&&-plasma membrane-%%-GO:0005829-&&-cytosol-%%-GO:0005737-&&-cytoplasm-%%-GO:0010008-&&-endosome membrane-%%-GO:0043231-&&-intracellular membrane-bounded organelle|molecular_function-&-1&-GO:0005070-&&-SH3/SH2…	G:9606:GRB14		FALSE		GRB14	Homo sapiens (Human)-&&-9606	Gene Symbol-&-1&-GRB14		0.366817	0.0995671	24	4		FALSE		GRB14	GRB14	150.182		0	23	0	0.712308	FALSE	1	GRB14	39260		0.06952
597047	taxon:9606	2.75795		4.068e-05	180873	1902	glutamate ionotropic receptor AMPA type subunit 1	gene	biological_process-&-1&-GO:0099566-&&-regulation of postsynaptic cytosolic calcium ion concentration-%%-GO:0007165-&&-signal transduction-%%-GO:0007616-&&-long-term memory-%%-GO:0034220-&&-ion transmembrane transport-%%-GO:0006888-&&-ER to Golgi vesicle-mediated transport-%%-GO:0031623-&&-receptor internalization-%%-GO:0060079-&&-excitatory postsynaptic potential-%%-GO:0048208-&&-COPII vesicle co…	G:9606:GRIA1		FALSE	KEGG-&-1&-hsa05031-&&-Amphetamine addiction-%%-hsa04723-&&-Retrograde endocannabinoid signaling-%%-hsa05014-&&-Amyotrophic lateral sclerosis (ALS)-%%-hsa04024-&&-cAMP signaling pathway-%%-hsa04724-&&-Glutamatergic synapse-%%-hsa04720-&&-Long-term potentiation-%%-hsa04728-&&-Dopaminergic synapse-%%-hsa05033-&&-Nicotine addiction-%%-hsa04730-&&-Long-term depression-%%-hsa04080-&&-Neuroactive ligand…	GRIA1	Homo sapiens (Human)-&&-9606	Gene Symbol-&-1&-GRIA1		0.362588	0.0688406	26	4		FALSE		GRIA1	GRIA1	114.292		0	25	0	0.707009	FALSE	1	GRIA1	63716		0.0593967
597048	taxon:9606	1.99192	10446	0.0166389	180878	1902	growth factor receptor bound protein 2	gene	biological_process-&-1&-GO:0007267-&&-cell-cell signaling-%%-GO:0051291-&&-protein heterooligomerization-%%-GO:0061024-&&-membrane organization-%%-GO:0008286-&&-insulin receptor signaling pathway-%%-GO:0036092-&&-phosphatidylinositol-3-phosphate biosynthetic process-%%-GO:0038083-&&-peptidyl-tyrosine autophosphorylation-%%-GO:0045087-&&-innate immune response-%%-GO:0043408-&&-regulation of MAPK c…	G:9606:GRB2		FALSE	KEGG-&-1&-hsa05223-&&-Non-small cell lung cancer-%%-hsa04062-&&-Chemokine signaling pathway-%%-hsa04510-&&-Focal adhesion-%%-hsa05205-&&-Proteoglycans in cancer-%%-hsa01521-&&-EGFR tyrosine kinase inhibitor resistance-%%-hsa04630-&&-JAK-STAT signaling pathway-%%-hsa04150-&&-mTOR signaling pathway-%%-hsa04014-&&-Ras signaling pathway-%%-hsa05165-&&-Human papillomavirus infection-%%-hsa05224-&&-Bre…	GRB2	Homo sapiens (Human)-&&-9606	Gene Symbol-&-1&-GRB2	0.550187	0.502027	0.0346586	649	4	0.0512819	FALSE	35.1557	GRB2	GRB2	98.847	84.685	0	648	0	0.834679	FALSE	1	GRB2	28126124	Infinity	0.0137015
597049	taxon:9606	2.76667		0	164494	1902	PAS domain containing repressor 1	gene	biological_process-&-1&-GO:0048511-&&-rhythmic process-%%-GO:0042754-&&-negative regulation of circadian rhythm-%%-GO:0045892-&&-negative regulation of transcription, DNA-templated|cellular_component-&-1&-GO:0005634-&&-nucleus-%%-GO:0016607-&&-nuclear speck-%%-GO:1990512-&&-Cry-Per complex|molecular_function-&-1&-GO:0001223-&&-transcription coactivator binding	G:9606:PASD1		FALSE		PASD1	Homo sapiens (Human)-&&-9606	Gene Symbol-&-1&-PASD1		0.361446	0	1	4		FALSE		PASD1	PASD1	2132		0	1	0	0.705556	FALSE	0	PASD1	0		0
597050	taxon:9606	2.74205		6.7e-07	164495	1902	BEN domain containing 2	gene	biological_process-&-1&-GO:0048741-&&-skeletal muscle fiber development	G:9606:BEND2		FALSE		BEND2	Homo sapiens (Human)-&&-9606	Gene Symbol-&-1&-BEND2		0.36469	0	2	4		FALSE		BEND2	BEND2	1159		0	2	0	0.709658	FALSE	0	BEND2	3622		0.509235
597051	taxon:9606	2.36538		0.00010226	180876	1902	growth factor receptor bound protein 10	gene	biological_process-&-1&-GO:0007411-&&-axon guidance-%%-GO:0046627-&&-negative regulation of insulin receptor signaling pathway-%%-GO:0046325-&&-negative regulation of glucose import-%%-GO:0030178-&&-negative regulation of Wnt signaling pathway-%%-GO:0048009-&&-insulin-like growth factor receptor signaling pathway-%%-GO:0042326-&&-negative regulation of phosphorylation-%%-GO:0030949-&&-positive re…	G:9606:GRB10		FALSE	KEGG-&-1&-hsa04150-&&-mTOR signaling pathway	GRB10	Homo sapiens (Human)-&&-9606	Gene Symbol-&-1&-GRB10		0.422764	0.220732	41	4		FALSE		GRB10	GRB10	240		0	41	0	0.772436	FALSE	0	GRB10	263092		0.0487458
597052	taxon:9606	2.61256		8.247e-05	180877	1902	growth factor receptor bound protein 7	gene	biological_process-&-1&-GO:0050900-&&-leukocyte migration-%%-GO:0030335-&&-positive regulation of cell migration-%%-GO:0017148-&&-negative regulation of translation-%%-GO:0009967-&&-positive regulation of signal transduction-%%-GO:0034063-&&-stress granule assembly-%%-GO:0038128-&&-ERBB2 signaling pathway-%%-GO:0007173-&&-epidermal growth factor receptor signaling pathway-%%-GO:0007411-&&-axon gu…	G:9606:GRB7		FALSE		GRB7	Homo sapiens (Human)-&&-9606	Gene Symbol-&-1&-GRB7		0.382766	0.0697674	43	4		FALSE		GRB7	GRB7	137.372		0	43	0	0.731239	FALSE	0	GRB7	151306		0.0457892
597053	taxon:9606	2.84077		9.79e-06	180882	1902	glutathione peroxidase 4	gene	biological_process-&-1&-GO:0006979-&&-response to oxidative stress-%%-GO:0019372-&&-lipoxygenase pathway-%%-GO:0055114-&&-oxidation-reduction process-%%-GO:0098869-&&-cellular oxidant detoxification-%%-GO:0006644-&&-phospholipid metabolic process-%%-GO:0007275-&&-multicellular organism development|cellular_component-&-1&-GO:0005634-&&-nucleus-%%-GO:0005829-&&-cytosol-%%-GO:0070062-&&-extracellula…	G:9606:GPX4		FALSE	KEGG-&-1&-hsa00480-&&-Glutathione metabolism-%%-hsa04216-&&-Ferroptosis	GPX4	Homo sapiens (Human)-&&-9606	Gene Symbol-&-1&-GPX4		0.352017	0.275269	31	4		FALSE		GPX4	GPX4	89.4839		0	31	0	0.693205	FALSE	0	GPX4	22972		0.0664334
597054	taxon:9606	2.88244		1.67e-06	180880	1902	glutathione peroxidase 7	gene	biological_process-&-1&-GO:0055114-&&-oxidation-reduction process-%%-GO:0098869-&&-cellular oxidant detoxification-%%-GO:0000302-&&-response to reactive oxygen species|cellular_component-&-1&-GO:0005576-&&-extracellular region-%%-GO:0005788-&&-endoplasmic reticulum lumen-%%-GO:0005783-&&-endoplasmic reticulum|molecular_function-&-1&-GO:0004602-&&-glutathione peroxidase activity-%%-GO:0005515-&&-p…	G:9606:GPX7		FALSE	KEGG-&-1&-hsa00480-&&-Glutathione metabolism-%%-hsa04918-&&-Thyroid hormone synthesis-%%-hsa00590-&&-Arachidonic acid metabolism	GPX7	Homo sapiens (Human)-&&-9606	Gene Symbol-&-1&-GPX7		0.346929	0.177778	10	4		FALSE		GPX7	GPX7	155.7		0	10	0	0.686261	FALSE	0	GPX7	4766		0.139587
597055	taxon:9606	2.66731		1.758e-05	164497	1902	SPANX family member N3	gene		G:9606:SPANXN3		FALSE		SPANXN3	Homo sapiens (Human)-&&-9606	Gene Symbol-&-1&-SPANXN3		0.37491	0.178571	8	4		FALSE		SPANXN3	SPANXN3	383.25		0	8	0	0.722115	FALSE	0	SPANXN3	26782		0.142174
597056	taxon:9606	2.59295		0.0001438	180887	1902	G protein pathway suppressor 2	gene	biological_process-&-1&-GO:0046329-&&-negative regulation of JNK cascade-%%-GO:0000188-&&-inactivation of MAPK activity-%%-GO:0034260-&&-negative regulation of GTPase activity-%%-GO:0000122-&&-negative regulation of transcription from RNA polymerase II promoter-%%-GO:0007049-&&-cell cycle-%%-GO:0007254-&&-JNK cascade|cellular_component-&-1&-GO:0017053-&&-transcriptional repressor complex-%%-GO:00…	G:9606:GPS2		FALSE	KEGG-&-1&-hsa05166-&&-Human T-cell leukemia virus 1 infection	GPS2	Homo sapiens (Human)-&&-9606	Gene Symbol-&-1&-GPS2		0.385661	0.108571	52	4		FALSE		GPS2	GPS2	131.8		0	51	0	0.734509	FALSE	1	GPS2	254784		0.0413317
597057	taxon:9606	2.85718		2e-07	180884	1902	glutathione peroxidase 2	gene	biological_process-&-1&-GO:0055114-&&-oxidation-reduction process-%%-GO:0098869-&&-cellular oxidant detoxification-%%-GO:0000302-&&-response to reactive oxygen species|cellular_component-&-1&-GO:0005737-&&-cytoplasm-%%-GO:0005829-&&-cytosol-%%-GO:0070062-&&-extracellular exosome|molecular_function-&-1&-GO:0004602-&&-glutathione peroxidase activity-%%-GO:0009055-&&-electron carrier activity	G:9606:GPX2		FALSE	KEGG-&-1&-hsa00480-&&-Glutathione metabolism-%%-hsa04918-&&-Thyroid hormone synthesis-%%-hsa00590-&&-Arachidonic acid metabolism	GPX2	Homo sapiens (Human)-&&-9606	Gene Symbol-&-1&-GPX2		0.349996	0.333333	5	4		FALSE		GPX2	GPX2	540.333		0	4	0	0.69047	FALSE	1	GPX2	1028		0.383251
597058	taxon:9606	2.76321		4.118e-05	180891	1902	G protein-coupled receptor kinase 6	gene	biological_process-&-1&-GO:0008277-&&-regulation of G-protein coupled receptor protein signaling pathway-%%-GO:0016055-&&-Wnt signaling pathway-%%-GO:0006468-&&-protein phosphorylation|cellular_component-&-1&-GO:0005886-&&-plasma membrane-%%-GO:0016020-&&-membrane|molecular_function-&-1&-GO:0004703-&&-G-protein coupled receptor kinase activity-%%-GO:0005524-&&-ATP binding-%%-GO:0047696-&&-beta-ad…	G:9606:GRK6		FALSE	KEGG-&-1&-hsa05032-&&-Morphine addiction-%%-hsa04062-&&-Chemokine signaling pathway-%%-hsa04144-&&-Endocytosis	GRK6	Homo sapiens (Human)-&&-9606	Gene Symbol-&-1&-GRK6		0.361899	0.025974	24	4		FALSE		GRK6	GRK6	140.682		0	23	0	0.706132	FALSE	1	GRK6	65558		0.0728266
597059	taxon:9606	2.52282		4.849e-05	180888	1902	G protein pathway suppressor 1	gene	biological_process-&-1&-GO:0000338-&&-protein deneddylation-%%-GO:0000188-&&-inactivation of MAPK activity-%%-GO:0034260-&&-negative regulation of GTPase activity-%%-GO:0000715-&&-nucleotide-excision repair, DNA damage recognition-%%-GO:0006283-&&-transcription-coupled nucleotide-excision repair-%%-GO:0007049-&&-cell cycle-%%-GO:0007254-&&-JNK cascade|cellular_component-&-1&-GO:0005829-&&-cytosol…	G:9606:GPS1		FALSE		GPS1	Homo sapiens (Human)-&&-9606	Gene Symbol-&-1&-GPS1		0.396382	0.275709	48	4		FALSE		GPS1	GPS1	210.125		0	48	0	0.746197	FALSE	0	GPS1	143300		0.0565805
597060	taxon:9606	2.66872		3.157e-05	180889	1902	MAP kinase interacting serine/threonine kinase 2	gene	biological_process-&-1&-GO:0046777-&&-protein autophosphorylation-%%-GO:0035556-&&-intracellular signal transduction-%%-GO:0006417-&&-regulation of translation-%%-GO:0030097-&&-hemopoiesis-%%-GO:0007166-&&-cell surface receptor signaling pathway-%%-GO:0006468-&&-protein phosphorylation-%%-GO:0097192-&&-extrinsic apoptotic signaling pathway in absence of ligand-%%-GO:0018105-&&-peptidyl-serine pho…	G:9606:MKNK2		FALSE	KEGG-&-1&-hsa04910-&&-Insulin signaling pathway-%%-hsa04010-&&-MAPK signaling pathway-%%-hsa04066-&&-HIF-1 signaling pathway	MKNK2	Homo sapiens (Human)-&&-9606	Gene Symbol-&-1&-MKNK2		0.374712	0.0719697	35	4		FALSE		MKNK2	MKNK2	141.152		0	34	0	0.72188	FALSE	1	MKNK2	64422		0.0540088
597061	taxon:9606	2.42218	599.651	0.00052094	180892	1902	G protein-coupled receptor kinase 5	gene	biological_process-&-1&-GO:0008277-&&-regulation of G-protein coupled receptor protein signaling pathway-%%-GO:0006915-&&-apoptotic process-%%-GO:0007188-&&-adenylate cyclase-modulating G-protein coupled receptor signaling pathway-%%-GO:0007217-&&-tachykinin receptor signaling pathway-%%-GO:0045444-&&-fat cell differentiation-%%-GO:0051726-&&-regulation of cell cycle-%%-GO:0016055-&&-Wnt signalin…	G:9606:GRK5		FALSE	KEGG-&-1&-hsa05032-&&-Morphine addiction-%%-hsa04062-&&-Chemokine signaling pathway-%%-hsa04144-&&-Endocytosis	GRK5	Homo sapiens (Human)-&&-9606	Gene Symbol-&-1&-GRK5	0.502664	0.412851	0.0496415	150	4	0.0178938	FALSE	12.481	GRK5	GRK5	116	13.4465	0	149	0	0.76297	FALSE	1	GRK5	1083786	Infinity	0.0265351
597062	taxon:9606	2.84603		4.79e-06	180893	1902	G protein-coupled receptor kinase 4	gene	biological_process-&-1&-GO:0008277-&&-regulation of G-protein coupled receptor protein signaling pathway-%%-GO:0031623-&&-receptor internalization-%%-GO:0002031-&&-G-protein coupled receptor internalization-%%-GO:0007165-&&-signal transduction-%%-GO:0006468-&&-protein phosphorylation-%%-GO:0022400-&&-regulation of rhodopsin mediated signaling pathway|cellular_component-&-1&-GO:0005829-&&-cytosol-…	G:9606:GRK4		FALSE	KEGG-&-1&-hsa05032-&&-Morphine addiction-%%-hsa04062-&&-Chemokine signaling pathway-%%-hsa04144-&&-Endocytosis	GRK4	Homo sapiens (Human)-&&-9606	Gene Symbol-&-1&-GRK4		0.351367	0.2	6	4		FALSE		GRK4	GRK4	352		0	6	0	0.692329	FALSE	0	GRK4	8362		0.264286
597063	taxon:9606	2.81577		2.86e-06	180900	1902	G protein-coupled receptor 37	gene	biological_process-&-1&-GO:0031987-&&-locomotion involved in locomotory behavior-%%-GO:0042416-&&-dopamine biosynthetic process-%%-GO:0045964-&&-positive regulation of dopamine metabolic process-%%-GO:1903206-&&-negative regulation of hydrogen peroxide-induced cell death-%%-GO:0007186-&&-G-protein coupled receptor signaling pathway-%%-GO:0007193-&&-adenylate cyclase-inhibiting G-protein coupled r…	G:9606:GPR37		FALSE	KEGG-&-1&-hsa05012-&&-Parkinson disease	GPR37	Homo sapiens (Human)-&&-9606	Gene Symbol-&-1&-GPR37		0.355143	0.325	16	4		FALSE		GPR37	GPR37	179		0	16	0	0.697372	FALSE	0	GPR37	9032		0.116228
597064	taxon:9606	2.66551		7.571e-05	164530	1902	carnosine N-methyltransferase 1	gene	biological_process-&-1&-GO:0006548-&&-histidine catabolic process-%%-GO:0032259-&&-methylation-%%-GO:0035498-&&-carnosine metabolic process|cellular_component-&-1&-GO:0005634-&&-nucleus-%%-GO:0005829-&&-cytosol|molecular_function-&-1&-GO:0030735-&&-carnosine N-methyltransferase activity	G:9606:CARNMT1		FALSE	KEGG-&-1&-hsa00340-&&-Histidine metabolism	CARNMT1	Homo sapiens (Human)-&&-9606	Gene Symbol-&-1&-CARNMT1		0.375162	0.05	16	4		FALSE		CARNMT1	CARNMT1	191.75		0	16	0	0.722415	FALSE	0	CARNMT1	55718		0.0711231
597065	taxon:9606	2.66718		1.571e-05	164534	1902	ring finger protein 183	gene	cellular_component-&-1&-GO:0016021-&&-integral component of membrane|molecular_function-&-1&-GO:0008270-&&-zinc ion binding-%%-GO:0005515-&&-protein binding	G:9606:RNF183		FALSE		RNF183	Homo sapiens (Human)-&&-9606	Gene Symbol-&-1&-RNF183		0.374928	0	6	4		FALSE		RNF183	RNF183	484		0	6	0	0.722137	FALSE	0	RNF183	29610		0.179888
597066	taxon:9606	2.74205		4.6e-07	164538	1902	leucine zipper and EF-hand containing transmembrane protein 2	gene	biological_process-&-1&-GO:0006875-&&-cellular metal ion homeostasis|cellular_component-&-1&-GO:0016021-&&-integral component of membrane-%%-GO:0005743-&&-mitochondrial inner membrane|molecular_function-&-1&-GO:0043022-&&-ribosome binding	G:9606:LETM2		FALSE		LETM2	Homo sapiens (Human)-&&-9606	Gene Symbol-&-1&-LETM2		0.36469	0	2	4		FALSE		LETM2	LETM2	1152.5		0	2	0	0.709658	FALSE	0	LETM2	1958		0.509063
597067	taxon:9606	2.81872		1.52e-05	164542	1902	UBX domain protein 2B	gene	biological_process-&-1&-GO:0061025-&&-membrane fusion-%%-GO:0031468-&&-nuclear envelope reassembly-%%-GO:0007030-&&-Golgi organization-%%-GO:0043161-&&-proteasome-mediated ubiquitin-dependent protein catabolic process|cellular_component-&-1&-GO:0005829-&&-cytosol-%%-GO:0005794-&&-Golgi apparatus-%%-GO:0005634-&&-nucleus-%%-GO:0005783-&&-endoplasmic reticulum|molecular_function-&-1&-GO:0005515-&&-…	G:9606:UBXN2B		FALSE		UBXN2B	Homo sapiens (Human)-&&-9606	Gene Symbol-&-1&-UBXN2B		0.354771	0.102941	17	4		FALSE		UBXN2B	UBXN2B	127.471		0	17	0	0.69688	FALSE	0	UBXN2B	23506		0.0830134
597068	taxon:9606	2.66756		1.47e-05	180930	1902	fyn related Src family tyrosine kinase	gene	biological_process-&-1&-GO:0007169-&&-transmembrane receptor protein tyrosine kinase signaling pathway-%%-GO:0008285-&&-negative regulation of cell proliferation-%%-GO:0016477-&&-cell migration-%%-GO:0038083-&&-peptidyl-tyrosine autophosphorylation-%%-GO:0045087-&&-innate immune response-%%-GO:0000122-&&-negative regulation of transcription from RNA polymerase II promoter-%%-GO:0006468-&&-protein…	G:9606:FRK		FALSE		FRK	Homo sapiens (Human)-&&-9606	Gene Symbol-&-1&-FRK		0.374874	0.241758	14	4		FALSE		FRK	FRK	305.714		0	14	0	0.722073	FALSE	0	FRK	27422		0.116524
597069	taxon:9606	2.60705		4.921e-05	164552	1902	VPS37A, ESCRT-I subunit	gene	biological_process-&-1&-GO:0075733-&&-intracellular transport of virus-%%-GO:0043162-&&-ubiquitin-dependent protein catabolic process via the multivesicular body sorting pathway-%%-GO:0016197-&&-endosomal transport-%%-GO:0016236-&&-macroautophagy-%%-GO:0039702-&&-viral budding via host ESCRT complex-%%-GO:0015031-&&-protein transport-%%-GO:0019058-&&-viral life cycle-%%-GO:0036258-&&-multivesicul…	G:9606:VPS37A		FALSE	KEGG-&-1&-hsa04144-&&-Endocytosis	VPS37A	Homo sapiens (Human)-&&-9606	Gene Symbol-&-1&-VPS37A		0.383575	0.333333	10	4		FALSE		VPS37A	VPS37A	365.8		0	10	0	0.732158	FALSE	0	VPS37A	35660		0.116757
597070	taxon:9606	2.76667		0	164564	1902	chromosome 7 open reading frame 31	gene	cellular_component-&-1&-GO:0005737-&&-cytoplasm-%%-GO:0005813-&&-centrosome|molecular_function-&-1&-GO:0005515-&&-protein binding	G:9606:C7orf31		FALSE		C7orf31	Homo sapiens (Human)-&&-9606	Gene Symbol-&-1&-C7orf31		0.361446	0	1	4		FALSE		C7orf31	C7orf31	2132		0	1	0	0.705556	FALSE	0	C7orf31	0		0
597071	taxon:9606	2.64551		2.877e-05	164571	1902	myotrophin	gene	biological_process-&-1&-GO:0071260-&&-cellular response to mechanical stimulus-%%-GO:0016202-&&-regulation of striated muscle tissue development-%%-GO:0010613-&&-positive regulation of cardiac muscle hypertrophy-%%-GO:0030307-&&-positive regulation of cell growth-%%-GO:0051247-&&-positive regulation of protein metabolic process-%%-GO:0030182-&&-neuron differentiation-%%-GO:0021707-&&-cerebellar g…	G:9606:MTPN		FALSE		MTPN	Homo sapiens (Human)-&&-9606	Gene Symbol-&-1&-MTPN		0.377999	0.0806723	35	4		FALSE		MTPN	MTPN	162.857		0	35	0	0.725748	FALSE	0	MTPN	89552		0.0581534
597072	taxon:9606	2.73769		1.348e-05	164569	1902	ankyrin repeat and SOCS box containing 10	gene	biological_process-&-1&-GO:0035556-&&-intracellular signal transduction-%%-GO:0016567-&&-protein ubiquitination|cellular_component-&-1&-GO:0005634-&&-nucleus-%%-GO:0000151-&&-ubiquitin ligase complex-%%-GO:0005737-&&-cytoplasm|molecular_function-&-1&-GO:0004842-&&-ubiquitin-protein transferase activity-%%-GO:0031625-&&-ubiquitin protein ligase binding	G:9606:ASB10		FALSE		ASB10	Homo sapiens (Human)-&&-9606	Gene Symbol-&-1&-ASB10		0.365271	0.0942029	24	4		FALSE		ASB10	ASB10	159.75		0	24	0	0.710385	FALSE	0	ASB10	34022		0.0754297
597073	taxon:9606	2.88308		1.251e-05	148201	1902	TMED7-TICAM2 readthrough	gene		G:9606:TMED7-TICAM2		FALSE		TMED7-TICAM2	Homo sapiens (Human)-&&-9606	Gene Symbol-&-1&-TMED7-TICAM2		0.346852	0.271429	23	4		FALSE		TMED7-TICAM2	TMED7-TICAM2	72.1429		0	22	0	0.686154	FALSE	1	TMED7-TICAM2	19514		0.0664646
597074	taxon:9606	2.76667		0	164591	1902	diffuse panbronchiolitis critical region 1	gene	biological_process-&-1&-GO:1903955-&&-positive regulation of protein targeting to mitochondrion|cellular_component-&-1&-GO:0016021-&&-integral component of membrane	G:9606:DPCR1		FALSE		DPCR1	Homo sapiens (Human)-&&-9606	Gene Symbol-&-1&-DPCR1		0.361446	0	1	4		FALSE		DPCR1	DPCR1	2132		0	1	0	0.705556	FALSE	0	DPCR1	0		0
597075	taxon:9606	2.91936		1.04e-06	164589	1902	tripartite motif containing 50	gene	cellular_component-&-1&-GO:0005829-&&-cytosol|molecular_function-&-1&-GO:0008270-&&-zinc ion binding-%%-GO:0016740-&&-transferase activity-%%-GO:0042802-&&-identical protein binding	G:9606:TRIM50		FALSE		TRIM50	Homo sapiens (Human)-&&-9606	Gene Symbol-&-1&-TRIM50		0.342541	0.102564	15	4		FALSE		TRIM50	TRIM50	126.462		0	14	0	0.680107	FALSE	1	TRIM50	4336		0.149386
597076	taxon:9606	2.67897		2.65e-06	164592	1902	tripartite motif containing 40	gene	biological_process-&-1&-GO:0042177-&&-negative regulation of protein catabolic process-%%-GO:0045116-&&-protein neddylation-%%-GO:1901223-&&-negative regulation of NIK/NF-kappaB signaling-%%-GO:0032088-&&-negative regulation of NF-kappaB transcription factor activity-%%-GO:1900181-&&-negative regulation of protein localization to nucleus-%%-GO:0030308-&&-negative regulation of cell growth|cellula…	G:9606:TRIM40		FALSE		TRIM40	Homo sapiens (Human)-&&-9606	Gene Symbol-&-1&-TRIM40		0.373277	0.3	5	4		FALSE		TRIM40	TRIM40	596.8		0	5	0	0.720171	FALSE	0	TRIM40	17312		0.228769
597077	taxon:9606	2.53026		1.449e-05	164602	1902	parkin coregulated	gene	biological_process-&-1&-GO:0060548-&&-negative regulation of cell death-%%-GO:0007286-&&-spermatid development-%%-GO:0034620-&&-cellular response to unfolded protein|cellular_component-&-1&-GO:0043005-&&-neuron projection-%%-GO:0097225-&&-sperm midpiece-%%-GO:0005829-&&-cytosol-%%-GO:0005739-&&-mitochondrion-%%-GO:0044297-&&-cell body-%%-GO:0031982-&&-vesicle-%%-GO:0005634-&&-nucleus|molecular_fu…	G:9606:PACRG		FALSE		PACRG	Homo sapiens (Human)-&&-9606	Gene Symbol-&-1&-PACRG		0.395217	0.45614	19	4		FALSE		PACRG	PACRG	328.474		0	19	0	0.744957	FALSE	0	PACRG	31986		0.0892107
597078	taxon:9606	2.72487		7.43e-06	164603	1902	histidine triad nucleotide binding protein 3	gene	cellular_component-&-1&-GO:0005737-&&-cytoplasm-%%-GO:0070062-&&-extracellular exosome-%%-GO:0005634-&&-nucleus|molecular_function-&-1&-GO:0000166-&&-nucleotide binding-%%-GO:0016787-&&-hydrolase activity	G:9606:HINT3		FALSE		HINT3	Homo sapiens (Human)-&&-9606	Gene Symbol-&-1&-HINT3		0.36699	0.133333	6	4		FALSE		HINT3	HINT3	422		0	6	0	0.712521	FALSE	0	HINT3	17358		0.177918
597079	taxon:9606	2.73179		1.862e-05	148220	1902	GPR75-ASB3 readthrough	gene		G:9606:GPR75-ASB3		FALSE		GPR75-ASB3	Homo sapiens (Human)-&&-9606	Gene Symbol-&-1&-GPR75-ASB3		0.36606	0.0695187	34	4		FALSE		GPR75-ASB3	GPR75-ASB3	130.706		0	34	0	0.711368	FALSE	0	GPR75-ASB3	63794		0.0610256
597080	taxon:9606	2.79064		6.2e-07	164615	1902	junction mediating and regulatory protein, p53 cofactor	gene	biological_process-&-1&-GO:0070358-&&-actin polymerization-dependent cell motility-%%-GO:0006357-&&-regulation of transcription from RNA polymerase II promoter-%%-GO:0051091-&&-positive regulation of sequence-specific DNA binding transcription factor activity-%%-GO:0070060-&&-'de novo' actin filament nucleation-%%-GO:0043065-&&-positive regulation of apoptotic process-%%-GO:0072332-&&-intrinsic a…	G:9606:JMY		FALSE		JMY	Homo sapiens (Human)-&&-9606	Gene Symbol-&-1&-JMY		0.358341	0.4	6	4		FALSE		JMY	JMY	394.167		0	6	0	0.70156	FALSE	0	JMY	2208		0.224246
597081	taxon:9606	2.76667		0	164616	1902	calcyphosine like	gene	cellular_component-&-1&-GO:0005737-&&-cytoplasm|molecular_function-&-1&-GO:0005509-&&-calcium ion binding	G:9606:CAPSL		FALSE		CAPSL	Homo sapiens (Human)-&&-9606	Gene Symbol-&-1&-CAPSL		0.361446	0	1	4		FALSE		CAPSL	CAPSL	2132		0	1	0	0.705556	FALSE	0	CAPSL	0		0
597082	taxon:9606	3.01308		1.24e-06	164623	1902	EGF like, fibronectin type III and laminin G domains	gene	biological_process-&-1&-GO:0019800-&&-peptide cross-linking via chondroitin 4-sulfate glycosaminoglycan-%%-GO:0030198-&&-extracellular matrix organization-%%-GO:0010811-&&-positive regulation of cell-substrate adhesion|cellular_component-&-1&-GO:0005604-&&-basement membrane-%%-GO:0045202-&&-synapse-%%-GO:0005614-&&-interstitial matrix-%%-GO:0030054-&&-cell junction|molecular_function-&-1&-GO:0005…	G:9606:EGFLAM		FALSE		EGFLAM	Homo sapiens (Human)-&&-9606	Gene Symbol-&-1&-EGFLAM		0.331887	0	4	4		FALSE		EGFLAM	EGFLAM	219		0	4	0	0.664487	FALSE	0	EGFLAM	3218		0.270471
597083	taxon:9606	2.55115		4.503e-05	164620	1902	proline rich coiled-coil 1	gene	cellular_component-&-1&-GO:0005794-&&-Golgi apparatus|molecular_function-&-1&-GO:0005515-&&-protein binding	G:9606:PRRC1		FALSE		PRRC1	Homo sapiens (Human)-&&-9606	Gene Symbol-&-1&-PRRC1		0.391979	0.112554	22	4		FALSE		PRRC1	PRRC1	235.591		0	22	0	0.741474	FALSE	0	PRRC1	82718		0.0666504
597084	taxon:9606	2.79538		1.131e-05	164626	1902	beta	gene	biological_process-&-1&-GO:0045892-&&-negative regulation of transcription, DNA-templated-%%-GO:0060346-&&-bone trabecula formation-%%-GO:0034614-&&-cellular response to reactive oxygen species-%%-GO:0007005-&&-mitochondrion organization-%%-GO:0045780-&&-positive regulation of bone resorption-%%-GO:2000273-&&-positive regulation of receptor activity-%%-GO:0001503-&&-ossification-%%-GO:0006355-&&-…	G:9606:PPARGC1B		FALSE	KEGG-&-1&-hsa04931-&&-Insulin resistance	PPARGC1B	Homo sapiens (Human)-&&-9606	Gene Symbol-&-1&-PPARGC1B		0.357733	0.104762	15	4		FALSE		PPARGC1B	PPARGC1B	154.4		0	15	0	0.700769	FALSE	0	PPARGC1B	19920		0.0920502
597085	taxon:9606	2.71		9.873e-05	181015	1902	FOS like 2, AP-1 transcription factor subunit	gene	biological_process-&-1&-GO:0006366-&&-transcription from RNA polymerase II promoter-%%-GO:0048146-&&-positive regulation of fibroblast proliferation-%%-GO:0006357-&&-regulation of transcription from RNA polymerase II promoter-%%-GO:0045944-&&-positive regulation of transcription from RNA polymerase II promoter-%%-GO:0003334-&&-keratinocyte development-%%-GO:0008219-&&-cell death|cellular_componen…	G:9606:FOSL2	FOSL2	TRUE	KEGG-&-1&-hsa04380-&&-Osteoclast differentiation	FOSL2	Homo sapiens (Human)-&&-9606	Gene Symbol-&-1&-FOSL2		0.369004	0.0838574	54	4		FALSE		FOSL2	FOSL2	80.1296		0	54	0	0.715	FALSE	0	FOSL2	156876		0.0351323
597086	taxon:9606	2.92128		9.8e-07	181013	1902	formyl peptide receptor 1	gene	biological_process-&-1&-GO:0007263-&&-nitric oxide mediated signal transduction-%%-GO:0007188-&&-adenylate cyclase-modulating G-protein coupled receptor signaling pathway-%%-GO:0007204-&&-positive regulation of cytosolic calcium ion concentration-%%-GO:0050900-&&-leukocyte migration-%%-GO:0007165-&&-signal transduction-%%-GO:0000187-&&-activation of MAPK activity-%%-GO:0007200-&&-phospholipase C-…	G:9606:FPR1		FALSE	KEGG-&-1&-hsa05150-&&-Staphylococcus aureus infection-%%-hsa04015-&&-Rap1 signaling pathway-%%-hsa04080-&&-Neuroactive ligand-receptor interaction	FPR1	Homo sapiens (Human)-&&-9606	Gene Symbol-&-1&-FPR1		0.342315	0.0952381	7	4		FALSE		FPR1	FPR1	138.571		0	7	0	0.679786	FALSE	0	FPR1	2642		0.173765
597087	taxon:9606	2.87256		1.38e-06	181016	1902	FosB proto-oncogene, AP-1 transcription factor subunit	gene	biological_process-&-1&-GO:0006366-&&-transcription from RNA polymerase II promoter-%%-GO:0043278-&&-response to morphine-%%-GO:0051412-&&-response to corticosterone-%%-GO:0009612-&&-response to mechanical stimulus-%%-GO:0007565-&&-female pregnancy-%%-GO:0000122-&&-negative regulation of transcription from RNA polymerase II promoter-%%-GO:0051591-&&-response to cAMP-%%-GO:0032570-&&-response to p…	G:9606:FOSB	FOSB	TRUE	KEGG-&-1&-hsa05031-&&-Amphetamine addiction-%%-hsa04657-&&-IL-17 signaling pathway-%%-hsa05034-&&-Alcoholism-%%-hsa04380-&&-Osteoclast differentiation-%%-hsa05030-&&-Cocaine addiction	FOSB	Homo sapiens (Human)-&&-9606	Gene Symbol-&-1&-FOSB		0.348121	0.466667	10	5		FALSE		FOSB	FOSB	186.7		0	10	0	0.687906	FALSE	0	FOSB	4798		0.157071
597088	taxon:9606	2.20628	1045.36	0.00422254	181017	1902	Fos proto-oncogene, AP-1 transcription factor subunit	gene	biological_process-&-1&-GO:0009409-&&-response to cold-%%-GO:0034097-&&-response to cytokine-%%-GO:0051412-&&-response to corticosterone-%%-GO:0034614-&&-cellular response to reactive oxygen species-%%-GO:1902895-&&-positive regulation of pri-miRNA transcription from RNA polymerase II promoter-%%-GO:0001661-&&-conditioned taste aversion-%%-GO:0045893-&&-positive regulation of transcription, DNA-t…	G:9606:FOS	FOS	TRUE	KEGG-&-1&-hsa05132-&&-Salmonella infection-%%-hsa04210-&&-Apoptosis-%%-hsa05142-&&-Chagas disease (American trypanosomiasis)-%%-hsa05224-&&-Breast cancer-%%-hsa05210-&&-Colorectal cancer-%%-hsa04926-&&-Relaxin signaling pathway-%%-hsa05031-&&-Amphetamine addiction-%%-hsa04010-&&-MAPK signaling pathway-%%-hsa04658-&&-Th1 and Th2 cell differentiation-%%-hsa04660-&&-T cell receptor signaling pathway…	FOS	Homo sapiens (Human)-&&-9606	Gene Symbol-&-1&-FOS	0.507686	0.453251	0.0369485	217	4	0.0143397	FALSE	13.3333	FOS	FOS	93.8512	15.5283	0	216	0	0.798953	FALSE	1	FOS	6150340	Infinity	0.0157475
597089	taxon:9606	3.16923		1e-08	181021	1902	folate hydrolase 1	gene	biological_process-&-1&-GO:0035609-&&-C-terminal protein deglutamylation-%%-GO:0008652-&&-cellular amino acid biosynthetic process-%%-GO:0006760-&&-folic acid-containing compound metabolic process-%%-GO:0006508-&&-proteolysis|cellular_component-&-1&-GO:0016020-&&-membrane-%%-GO:0005737-&&-cytoplasm-%%-GO:0005886-&&-plasma membrane-%%-GO:0009986-&&-cell surface-%%-GO:0070062-&&-extracellular exoso…	G:9606:FOLH1	FOLH1	TRUE	KEGG-&-1&-hsa04977-&&-Vitamin digestion and absorption-%%-hsa00250-&&-Alanine, aspartate and glutamate metabolism-%%-hsa01100-&&-Metabolic pathways	FOLH1	Homo sapiens (Human)-&&-9606	Gene Symbol-&-1&-FOLH1		0.315534	0	4	5		FALSE		FOLH1	FOLH1	144.5		0	3	0	0.638462	FALSE	1	FOLH1	30		0.514337
597090	taxon:9606	2.53897		2.866e-05	181027	1902	fragile X mental retardation 1	gene	biological_process-&-1&-GO:0060999-&&-positive regulation of dendritic spine development-%%-GO:1901800-&&-positive regulation of proteasomal protein catabolic process-%%-GO:2000301-&&-negative regulation of synaptic vesicle exocytosis-%%-GO:0031047-&&-gene silencing by RNA-%%-GO:1901254-&&-positive regulation of intracellular transport of viral material-%%-GO:0008380-&&-RNA splicing-%%-GO:1902416…	G:9606:FMR1		FALSE	KEGG-&-1&-hsa03013-&&-RNA transport	FMR1	Homo sapiens (Human)-&&-9606	Gene Symbol-&-1&-FMR1		0.39386	0.14795	36	4		FALSE		FMR1	FMR1	224.794		0	35	0	0.743504	FALSE	1	FMR1	81494		0.0624959
597091	taxon:9606	2.49808		7.723e-05	164640	1902	eukaryotic translation initiation factor 5A-like 1	gene	biological_process-&-1&-GO:0007204-&&-positive regulation of cytosolic calcium ion concentration-%%-GO:0007568-&&-aging-%%-GO:0051028-&&-mRNA transport-%%-GO:2000379-&&-positive regulation of reactive oxygen species metabolic process-%%-GO:0045905-&&-positive regulation of translational termination-%%-GO:0051149-&&-positive regulation of muscle cell differentiation-%%-GO:0015031-&&-protein transp…	G:9606:EIF5AL1		FALSE		EIF5AL1	Homo sapiens (Human)-&&-9606	Gene Symbol-&-1&-EIF5AL1		0.400308	0.142995	46	4		FALSE		EIF5AL1	EIF5AL1	219.478		0	46	0	0.750321	FALSE	0	EIF5AL1	192940		0.0562254
[truncated: 7,354 more rows]

## Sheet: Supplementary Material 7
Supplementary Material 7
The 122 key targets in the treatment of AIDS by JAKCP
SMARCA4	HIST1H3A	GAPDH	NTRK1
FN1	HIST1H3B	HNRNPA1	HDAC1
HNRNPK	HIST1H3D	HDAC5	UBL4A
EWSR1	UBC	MYH9	MDM2
PSMD2	ILF3	TUBB	CLTC
SNW1	HDAC2	APP	KAT5
PABPC1	CUL7	VCAM1	ARRB2
RPA1	YWHAQ	FLNA	RACK1
HIST1H3H	CDK2	CCDC8	HSP90AB1
RNF2	IQGAP1	CUL4B	PARP1
HSPA5	MCM2	OBSL1	RPS27A
RPA2	HIST1H3I	ITGA4	GRB2
NCL	XRCC6	CDC5L	EEF1A1
TUBG1	PSMA3	CUL5	RPA3
[truncated: 17 more rows]

[truncated: 7 more sheets: Supplementary Material 8, Supplementary Material 9, Supplementary Material 10, Supplementary Material 11, Supplementary Material 12, Supplementary Material 13, Supplementary Material 14]
